# Supplementary material for: Study on the Mechanism of DNHP's Effects on Brain Damage Based on Network Toxicology
Source: Research Square preprint supplement (doi:10.21203/rs.3.rs-7966294/v1), 2025-12-01
Supplement: Supplementary file 1 [file 0d7e150ad0904e6b0a80207c.xlsx]

## Sheet: Sheet1
ONTOLOGY	ID	Description	GeneRatio	BgRatio	RichFactor	FoldEnrichment	zScore	pvalue	p.adjust	qvalue	geneID	Count
BP	GO:0042391	regulation of membrane potential	28/130	446/18888	0.0627803	9.12149	14.4497	2.91886e-19	1.07764e-15	6.10195e-16	GRIN2B/GRIN1/ABAT/GRIN3A/GRIN2D/KMT2A/GBA1/TNF/APP/GRIN2A/PARP1/GABRB3/GABRA3/GABRG2/GABRA1/GABRA5/GABRA2/SCN4A/GRM5/VCP/ADORA1/ADORA2A/TSPO/SCN5A/KCNK9/P2RX7/ABL1/LRRK2	28
BP	GO:0043410	positive regulation of MAPK cascade	26/130	475/18888	0.0547368	7.95284	12.7763	1.82819e-16	2.92084e-13	1.65387e-13	EZH2/HRAS/FGFR1/TNF/CDH2/APP/VEGFA/FGF23/F2R/FLT1/PDGFRB/KIT/ELANE/GRM5/AR/EGFR/PRKCA/ADORA1/JAK2/MAP2K1/HTR2C/HTR2A/P2RX7/RAF1/ABL1/LRRK2	26
BP	GO:0060078	regulation of postsynaptic membrane potential	17/130	148/18888	0.114865	16.689	15.9515	2.37338e-16	2.92084e-13	1.65387e-13	GRIN2B/GRIN1/ABAT/GRIN3A/GRIN2D/APP/GRIN2A/GABRA3/GABRG2/GABRA1/GABRA5/GABRA2/GRM5/ADORA1/ADORA2A/P2RX7/LRRK2	17
BP	GO:0050804	modulation of chemical synaptic transmission	25/130	493/18888	0.0507099	7.36776	11.9267	4.35464e-15	3.36837e-12	1.90728e-12	GRIN2B/GRIN1/KRAS/GRIN3A/CACNA1B/HRAS/GRIN2D/KMT2A/YWHAG/TNF/CDH2/APP/GRIN2A/F2R/KIT/GRM5/EGFR/SLC6A9/ADORA1/ADORA2A/JAK2/OXTR/HTR2A/ABL1/LRRK2	25
BP	GO:0099177	regulation of trans-synaptic signaling	25/130	494/18888	0.0506073	7.35285	11.9112	4.56172e-15	3.36837e-12	1.90728e-12	GRIN2B/GRIN1/KRAS/GRIN3A/CACNA1B/HRAS/GRIN2D/KMT2A/YWHAG/TNF/CDH2/APP/GRIN2A/F2R/KIT/GRM5/EGFR/SLC6A9/ADORA1/ADORA2A/JAK2/OXTR/HTR2A/ABL1/LRRK2	25
BP	GO:0051966	regulation of synaptic transmission, glutamatergic	13/130	80/18888	0.1625	23.61	16.8707	8.98896e-15	5.53121e-12	3.13194e-12	GRIN2B/GRIN1/GRIN2D/TNF/CDH2/GRIN2A/GRM5/EGFR/ADORA1/ADORA2A/OXTR/HTR2A/LRRK2	13
BP	GO:0071900	regulation of protein serine/threonine kinase activity	19/130	267/18888	0.071161	10.3392	12.7944	2.80796e-14	1.481e-11	8.38586e-12	EZH2/HTT/HRAS/FGFR1/GBA1/TNF/ACTB/VEGFA/FLT1/PDGFRB/KIT/ELANE/PRKCD/EGFR/MAP2K1/CCND1/CCND2/ABL1/LRRK2	19
BP	GO:0035249	synaptic transmission, glutamatergic	14/130	113/18888	0.123894	18.0008	15.0896	4.03724e-14	1.86318e-11	1.05499e-11	GRIN2B/GRIN1/GRIN3A/GRIN2D/TNF/CDH2/GRIN2A/GRM5/EGFR/ADORA1/ADORA2A/OXTR/HTR2A/LRRK2	14
BP	GO:0045859	regulation of protein kinase activity	23/130	470/18888	0.0489362	7.11005	11.1669	1.30591e-13	5.35715e-11	3.03339e-11	EZH2/HTT/HRAS/FGFR1/GBA1/YWHAG/TNF/ACTB/APP/VEGFA/FLT1/PDGFRB/KIT/ELANE/PRKCD/GRM5/EGFR/JAK2/MAP2K1/CCND1/CCND2/ABL1/LRRK2	23
BP	GO:0045860	positive regulation of protein kinase activity	18/130	257/18888	0.0700389	10.1761	12.3301	1.85171e-13	6.8365e-11	3.87104e-11	EZH2/HRAS/FGFR1/TNF/VEGFA/FLT1/PDGFRB/KIT/ELANE/PRKCD/GRM5/EGFR/JAK2/MAP2K1/CCND1/CCND2/ABL1/LRRK2	18
BP	GO:0071902	positive regulation of protein serine/threonine kinase activity	14/130	127/18888	0.110236	16.0165	14.1352	2.1033e-13	6.94874e-11	3.93459e-11	EZH2/HRAS/FGFR1/TNF/VEGFA/FLT1/PDGFRB/KIT/ELANE/EGFR/MAP2K1/CCND1/CCND2/LRRK2	14
BP	GO:0051932	synaptic transmission, GABAergic	11/130	59/18888	0.186441	27.0884	16.7078	2.25853e-13	6.94874e-11	3.93459e-11	EZH2/KRAS/GABRB3/GABRA3/GABRG2/GABRA1/GABRA5/GABRA2/ADORA1/ADORA2A/OXTR	11
BP	GO:0042063	gliogenesis	20/130	346/18888	0.0578035	8.3984	11.5627	2.81603e-13	7.99751e-11	4.52844e-11	SHH/EZH2/KRAS/ADGRG1/NAGLU/HRAS/GBA1/POU3F2/HEXB/NDRG1/TNF/CDH2/APP/SMO/EGFR/ADORA2A/MAP2K1/TSPO/RAF1/ABL1	20
BP	GO:0048732	gland development	22/130	449/18888	0.0489978	7.119	10.9243	4.59695e-13	1.21228e-10	6.86431e-11	UPB1/SHH/EZH2/NCOR2/NAGLU/FGFR1/POU3F2/ASH1L/TNF/VEGFA/SMO/AR/HIF1A/EGFR/JAK2/MAP2K1/OXTR/TSPO/CCND1/RAF1/ABL1/CRHR1	22
BP	GO:1901136	carbohydrate derivative catabolic process	18/130	273/18888	0.0659341	9.57971	11.8873	5.20057e-13	1.28003e-10	7.24795e-11	UPB1/OGT/NEU1/NAGLU/GBA1/NAGA/NGLY1/HEXA/HEXB/APP/PDE10A/PRKCD/HIF1A/HTR2A/PDE4A/PDE4B/P2RX7/GCK	18
BP	GO:0050890	cognition	19/130	322/18888	0.0590062	8.57315	11.4105	8.09809e-13	1.86863e-10	1.05808e-10	GRIN2B/GRIN1/KRAS/HTT/KMT2A/TNF/APP/GRIN2A/KIT/GABRA5/GRM5/HIF1A/EGFR/CASP3/ADORA1/OXTR/HTR2A/CCND2/ABL1	19
BP	GO:0033674	positive regulation of kinase activity	18/130	303/18888	0.0594059	8.63123	11.1479	3.03447e-12	6.39806e-10	3.62278e-10	EZH2/HRAS/FGFR1/TNF/VEGFA/FLT1/PDGFRB/KIT/ELANE/PRKCD/GRM5/EGFR/JAK2/MAP2K1/CCND1/CCND2/ABL1/LRRK2	18
BP	GO:0032259	methylation	17/130	262/18888	0.0648855	9.42736	11.4352	3.11931e-12	6.39806e-10	3.62278e-10	KMT2D/NSD2/PRDM16/PRMT7/GAMT/EZH2/EHMT1/KMT2E/HNMT/SETD2/KMT2A/SETD1A/NSD1/ASH1L/SETD1B/KMT2C/PARP1	17
BP	GO:0048168	regulation of neuronal synaptic plasticity	10/130	58/18888	0.172414	25.0504	15.2711	6.62464e-12	1.28727e-09	7.28894e-10	GRIN2B/GRIN1/KRAS/HRAS/GRIN2D/KMT2A/APP/GRIN2A/KIT/GRM5	10
BP	GO:0021782	glial cell development	13/130	133/18888	0.0977444	14.2015	12.7189	7.49594e-12	1.34745e-09	7.62969e-10	SHH/KRAS/NAGLU/HRAS/POU3F2/NDRG1/TNF/APP/SMO/EGFR/ADORA2A/MAP2K1/RAF1	13
BP	GO:0007611	learning or memory	17/130	278/18888	0.0611511	8.88478	11.0255	8.04465e-12	1.34745e-09	7.62969e-10	GRIN2B/GRIN1/KRAS/HTT/KMT2A/APP/GRIN2A/KIT/GABRA5/GRM5/HIF1A/EGFR/CASP3/OXTR/HTR2A/CCND2/ABL1	17
BP	GO:0043405	regulation of MAP kinase activity	13/130	134/18888	0.0970149	14.0955	12.6645	8.2534e-12	1.34745e-09	7.62969e-10	EZH2/HRAS/FGFR1/GBA1/TNF/VEGFA/FLT1/PDGFRB/KIT/ELANE/PRKCD/EGFR/LRRK2	13
BP	GO:0048872	homeostasis of number of cells	18/130	322/18888	0.0559006	8.12193	10.7307	8.39419e-12	1.34745e-09	7.62969e-10	EZH2/KRAS/ADGRG1/KMT2E/KMT2A/GBA1/CDH2/VEGFA/F2R/KIT/SMO/HIF1A/CASP3/MAPK14/JAK2/PDE4B/P2RX7/ABL1	18
BP	GO:0043406	positive regulation of MAP kinase activity	11/130	82/18888	0.134146	19.4904	13.969	9.88918e-12	1.52129e-09	8.614e-10	EZH2/HRAS/FGFR1/TNF/VEGFA/FLT1/PDGFRB/KIT/ELANE/EGFR/LRRK2	11
BP	GO:0048708	astrocyte differentiation	11/130	88/18888	0.125	18.1615	13.4332	2.18311e-11	3.17635e-09	1.79855e-09	SHH/KRAS/NAGLU/POU3F2/TNF/APP/SMO/EGFR/ADORA2A/MAP2K1/ABL1	11
BP	GO:0048511	rhythmic process	17/130	297/18888	0.0572391	8.31639	10.58	2.29376e-11	3.17635e-09	1.79855e-09	OGT/EZH2/GRIN3A/MAPK8/NCOR2/NAGLU/KMT2A/TNF/MAPK10/PARP1/EGFR/CASP3/RORB/RORA/ADORA1/ADORA2A/OXTR	17
BP	GO:0050808	synapse organization	21/130	493/18888	0.0425963	6.18892	9.71875	2.3229e-11	3.17635e-09	1.79855e-09	L1CAM/GRIN2B/OGT/AGRN/TNF/ACTB/CDH2/APP/F2R/GABRB3/GABRA3/GABRG2/GABRA1/GABRA5/GABRA2/GRM5/VCP/MAPK14/OXTR/ABL1/LRRK2	21
BP	GO:0009410	response to xenobiotic stimulus	20/130	444/18888	0.045045	6.5447	9.84242	2.69146e-11	3.54889e-09	2.00949e-09	GRIN1/NOS1/CERS1/ABAT/NAT2/TNF/GRIN2A/EGFR/CASP3/RORA/ADORA2A/OXTR/HTR2A/PDE4A/PDE4B/TSPO/CCND1/CDK4/P2RX7/ABL1	20
BP	GO:0010001	glial cell differentiation	16/130	260/18888	0.0615385	8.94107	10.7335	3.1413e-11	3.9992e-09	2.26447e-09	SHH/KRAS/NAGLU/HRAS/GBA1/POU3F2/NDRG1/TNF/CDH2/APP/SMO/EGFR/ADORA2A/MAP2K1/RAF1/ABL1	16
BP	GO:0031644	regulation of nervous system process	12/130	119/18888	0.10084	14.6513	12.4362	3.43079e-11	4.22216e-09	2.39072e-09	GRIN2B/GRIN1/ABAT/GRIN2D/GBA1/TNF/APP/GRIN2A/F2R/ADORA1/HTR2C/LRRK2	12
BP	GO:0043269	regulation of monoatomic ion transport	20/130	470/18888	0.0425532	6.18265	9.47195	7.43003e-11	8.84892e-09	5.01054e-09	GRIN2B/GRIN1/NOS1/HTT/GRIN2D/GRIN2A/F2R/PDGFRB/GRM5/SLC6A9/ADORA1/ADORA2A/HTR2A/PDE4B/TSPO/SCN5A/P2RX7/ABL1/GCK/CRHR1	20
BP	GO:0009416	response to light stimulus	17/130	321/18888	0.0529595	7.69461	10.0709	7.76329e-11	8.95689e-09	5.07167e-09	GRIN1/CERS1/KRAS/MAPK8/KMT2A/MAPK10/APP/GRIN2A/PARP1/KIT/ELANE/PRKCD/HIF1A/EGFR/CASP3/MAPK14/CCND1	17
BP	GO:1900274	regulation of phospholipase C activity	8/130	36/18888	0.222222	32.2872	15.6422	1.0427e-10	1.16656e-08	6.60543e-09	HRAS/FGFR1/FLT1/PDGFRB/KIT/EGFR/HTR2A/ABL1	8
BP	GO:0051347	positive regulation of transferase activity	18/130	376/18888	0.0478723	6.95548	9.71056	1.07878e-10	1.17142e-08	6.63296e-09	EZH2/HRAS/FGFR1/TNF/VEGFA/FLT1/PDGFRB/KIT/ELANE/PRKCD/GRM5/EGFR/JAK2/MAP2K1/CCND1/CCND2/ABL1/LRRK2	18
BP	GO:0006816	calcium ion transport	19/130	428/18888	0.0443925	6.44989	9.4941	1.13355e-10	1.19574e-08	6.77065e-09	GRIN2B/GRIN1/NOS1/HTT/GRIN3A/CACNA1B/GRIN2D/GRIN2A/F2R/PDGFRB/ADORA2A/HTR2C/HTR2A/PDE4B/TSPO/P2RX7/ABL1/GCK/CRHR1	19
BP	GO:0009314	response to radiation	19/130	431/18888	0.0440835	6.405	9.4496	1.27619e-10	1.30881e-08	7.41087e-09	GRIN1/CERS1/KRAS/MAPK8/HRAS/KMT2A/MAPK10/APP/GRIN2A/PARP1/KIT/ELANE/PRKCD/HIF1A/EGFR/CASP3/MAPK14/CCND1/CCND2	19
BP	GO:0043523	regulation of neuron apoptotic process	15/130	244/18888	0.0614754	8.9319	10.3816	1.36887e-10	1.35392e-08	7.66632e-09	KRAS/HRAS/GBA1/TNF/PARP1/RAD21/F2R/HIF1A/CASP3/ADORA2A/JAK2/HTR2A/CCND1/TERT/ABL1	15
BP	GO:0023061	signal release	20/130	487/18888	0.0410678	5.96683	9.24449	1.39352e-10	1.35392e-08	7.66632e-09	PORCN/ABAT/FGFR1/TNF/FGF23/F2R/HIF1A/EGFR/ADORA1/ADORA2A/JAK2/OXTR/HTR2C/HTR2A/TSPO/P2RX7/RAF1/GCK/LRRK2/CRHR1	20
BP	GO:0021549	cerebellum development	11/130	105/18888	0.104762	15.2211	12.1648	1.53988e-10	1.45775e-08	8.25424e-09	ATIC/EZH2/ABAT/NCOR2/NAGLU/GBA1/SMO/RORA/MAP2K1/SCN5A/ABL1	11
BP	GO:0051402	neuron apoptotic process	16/130	292/18888	0.0547945	7.96122	9.97992	1.76468e-10	1.6288e-08	9.22277e-09	KRAS/HRAS/GBA1/TNF/APP/PARP1/RAD21/F2R/HIF1A/CASP3/ADORA2A/JAK2/HTR2A/CCND1/TERT/ABL1	16
BP	GO:0032496	response to lipopolysaccharide	17/130	348/18888	0.0488506	7.09761	9.55772	2.71592e-10	2.44565e-08	1.3848e-08	NOS1/MAPK8/NAGLU/ADM/TNF/F2R/ELANE/CASP3/PRKCA/MAPK14/JAK2/PDE4B/CASP1/TSPO/CDK4/P2RX7/ABL1	17
BP	GO:0048167	regulation of synaptic plasticity	14/130	216/18888	0.0648148	9.41709	10.3575	2.91608e-10	2.56337e-08	1.45146e-08	GRIN2B/GRIN1/KRAS/HRAS/GRIN2D/KMT2A/YWHAG/APP/GRIN2A/KIT/GRM5/ADORA1/ADORA2A/ABL1	14
BP	GO:0050679	positive regulation of epithelial cell proliferation	14/130	219/18888	0.0639269	9.28809	10.2701	3.49744e-10	3.00292e-08	1.70035e-08	NRAS/SHH/HRAS/FGFR1/B4GALT1/TNF/VEGFA/SMO/AR/HIF1A/EGFR/PRKCA/SCN5A/CCND1	14
BP	GO:0030900	forebrain development	18/130	408/18888	0.0441176	6.40995	9.19671	4.04006e-10	3.38998e-08	1.91951e-08	ATIC/SHH/EZH2/KRAS/ADGRG1/POMGNT1/FGFR1/SETD2/POU3F2/CDH2/APP/SMO/HIF1A/EGFR/CASP3/OXTR/SCN5A/LRRK2	18
BP	GO:0022037	metencephalon development	11/130	115/18888	0.0956522	13.8975	11.5491	4.14988e-10	3.40475e-08	1.92787e-08	ATIC/EZH2/ABAT/NCOR2/NAGLU/GBA1/SMO/RORA/MAP2K1/SCN5A/ABL1	11
BP	GO:0010038	response to metal ion	17/130	360/18888	0.0472222	6.86103	9.34696	4.57286e-10	3.67022e-08	2.07819e-08	SHH/ABAT/MAPK8/SETD2/KMT2A/NDRG1/FGF23/PARP1/KIT/HIF1A/EGFR/CASP3/TSPO/SCN5A/P2RX7/TERT/LRRK2	17
BP	GO:0014002	astrocyte development	8/130	44/18888	0.181818	26.4168	14.0514	5.83219e-10	4.58138e-08	2.59412e-08	KRAS/NAGLU/POU3F2/TNF/APP/SMO/EGFR/ADORA2A	8
BP	GO:0002237	response to molecule of bacterial origin	17/130	369/18888	0.0460705	6.69368	9.19513	6.67139e-10	5.07783e-08	2.87523e-08	NOS1/MAPK8/NAGLU/ADM/TNF/F2R/ELANE/CASP3/PRKCA/MAPK14/JAK2/PDE4B/CASP1/TSPO/CDK4/P2RX7/ABL1	17
BP	GO:1900542	regulation of purine nucleotide metabolic process	10/130	91/18888	0.10989	15.9662	11.9137	6.73926e-10	5.07783e-08	2.87523e-08	OGT/NOS1/APP/PARP1/HIF1A/VCP/HTR2A/TSPO/P2RX7/GCK	10
BP	GO:0006140	regulation of nucleotide metabolic process	10/130	92/18888	0.108696	15.7926	11.8404	7.51744e-10	5.55088e-08	3.14308e-08	OGT/NOS1/APP/PARP1/HIF1A/VCP/HTR2A/TSPO/P2RX7/GCK	10
BP	GO:0050673	epithelial cell proliferation	19/130	482/18888	0.0394191	5.72729	8.75217	8.34569e-10	6.04163e-08	3.42096e-08	NRAS/SHH/HRAS/FGFR1/B4GALT1/TNF/VEGFA/FLT1/KIT/SMO/AR/HIF1A/EGFR/PRKCA/MAP2K1/SCN5A/CCND1/CDK4/RAF1	19
BP	GO:0030902	hindbrain development	12/130	158/18888	0.0759494	11.0349	10.5446	9.49688e-10	6.74279e-08	3.81798e-08	ATIC/SHH/EZH2/ABAT/NCOR2/NAGLU/GBA1/SMO/RORA/MAP2K1/SCN5A/ABL1	12
BP	GO:0034762	regulation of transmembrane transport	19/130	489/18888	0.0388548	5.6453	8.66426	1.0602e-09	7.38538e-08	4.18183e-08	GRIN2B/GRIN1/NOS1/HTT/GRIN2D/TNF/ACTB/APP/GRIN2A/F2R/GRM5/SLC6A9/MAPK14/PDE4B/SCN5A/P2RX7/TERT/ABL1/CRHR1	19
BP	GO:1903578	regulation of ATP metabolic process	9/130	72/18888	0.125	18.1615	12.1456	1.54682e-09	1.05757e-07	5.98828e-08	OGT/APP/PARP1/HIF1A/VCP/HTR2A/TSPO/P2RX7/GCK	9
BP	GO:0007623	circadian rhythm	13/130	205/18888	0.0634146	9.21366	9.84351	1.70184e-09	1.1424e-07	6.46861e-08	OGT/EZH2/MAPK8/NAGLU/KMT2A/TNF/MAPK10/PARP1/EGFR/RORB/RORA/ADORA1/ADORA2A	13
BP	GO:0010517	regulation of phospholipase activity	8/130	52/18888	0.153846	22.3527	12.8357	2.36496e-09	1.55918e-07	8.82859e-08	HRAS/FGFR1/FLT1/PDGFRB/KIT/EGFR/HTR2A/ABL1	8
BP	GO:0060688	regulation of morphogenesis of a branching structure	8/130	53/18888	0.150943	21.9309	12.7029	2.76942e-09	1.7938e-07	1.01571e-07	SHH/FGFR1/TNF/VEGFA/SMO/AR/ABL1/LRRK2	8
BP	GO:0010863	positive regulation of phospholipase C activity	7/130	34/18888	0.205882	29.9131	14.0473	2.86543e-09	1.82399e-07	1.0328e-07	HRAS/FGFR1/FLT1/PDGFRB/KIT/EGFR/HTR2A	7
BP	GO:0006643	membrane lipid metabolic process	13/130	217/18888	0.0599078	8.70415	9.50234	3.39957e-09	2.12732e-07	1.20456e-07	CERS1/ASAH1/ST3GAL3/NEU1/NAGLU/GBA1/NAGA/HEXA/HEXB/TNF/KIT/PRKCD/P2RX7	13
BP	GO:0051968	positive regulation of synaptic transmission, glutamatergic	7/130	36/18888	0.194444	28.2513	13.6245	4.39587e-09	2.70493e-07	1.53161e-07	GRIN2B/GRIN1/GRIN2D/GRIN2A/EGFR/ADORA2A/OXTR	7
BP	GO:0006672	ceramide metabolic process	10/130	111/18888	0.0900901	13.0894	10.6344	4.8132e-09	2.91317e-07	1.64953e-07	CERS1/ASAH1/ST3GAL3/NEU1/NAGLU/GBA1/HEXA/HEXB/PRKCD/P2RX7	10
BP	GO:0061900	glial cell activation	8/130	57/18888	0.140351	20.3919	12.2062	5.04568e-09	3.00462e-07	1.70131e-07	NAGLU/TNF/APP/SMO/EGFR/ADORA2A/JAK2/LRRK2	8
BP	GO:0050878	regulation of body fluid levels	16/130	370/18888	0.0432432	6.28291	8.54352	5.44226e-09	3.18934e-07	1.8059e-07	SHH/NCOR2/ADM/ACTB/VEGFA/F2R/PRKCD/HIF1A/EGFR/PRKCA/ADORA1/ADORA2A/MAPK14/JAK2/OXTR/CCND1	16
BP	GO:0150076	neuroinflammatory response	9/130	83/18888	0.108434	15.7546	11.2147	5.60561e-09	3.20355e-07	1.81395e-07	NAGLU/POMGNT1/TNF/APP/SMO/EGFR/ADORA2A/JAK2/LRRK2	9
BP	GO:0051345	positive regulation of hydrolase activity	18/130	482/18888	0.0373444	5.42585	8.19409	5.64005e-09	3.20355e-07	1.81395e-07	GRIN2B/EZH2/HRAS/FGFR1/AGRN/TNF/GRIN2A/F2R/FLT1/PDGFRB/KIT/PRKCD/CTSK/EGFR/VCP/JAK2/HTR2A/CASP1	18
BP	GO:0035235	ionotropic glutamate receptor signaling pathway	6/130	22/18888	0.272727	39.6252	15.0904	6.45161e-09	3.57613e-07	2.02492e-07	GRIN2B/GRIN1/GRIN3A/GRIN2D/APP/GRIN2A	6
BP	GO:0097553	calcium ion transmembrane import into cytosol	12/130	187/18888	0.0641711	9.32357	9.52265	6.48973e-09	3.57613e-07	2.02492e-07	GRIN2B/GRIN1/NOS1/HTT/CACNA1B/GRIN2D/GRIN2A/F2R/HTR2C/HTR2A/P2RX7/ABL1	12
BP	GO:0021537	telencephalon development	14/130	275/18888	0.0509091	7.3967	8.89557	6.69487e-09	3.63492e-07	2.0582e-07	ATIC/SHH/EZH2/ADGRG1/POMGNT1/POU3F2/CDH2/SMO/HIF1A/EGFR/CASP3/OXTR/SCN5A/LRRK2	14
BP	GO:0099565	chemical synaptic transmission, postsynaptic	10/130	115/18888	0.0869565	12.6341	10.4178	6.80155e-09	3.63932e-07	2.0607e-07	GRIN2B/GRIN1/ABAT/GRIN2D/APP/GRIN2A/ADORA1/ADORA2A/P2RX7/LRRK2	10
BP	GO:0055074	calcium ion homeostasis	15/130	326/18888	0.0460123	6.68523	8.61994	7.36343e-09	3.88369e-07	2.19906e-07	GRIN1/NOS1/HTT/FGFR1/HEXB/APP/FGF23/F2R/ELANE/GRM5/ADORA1/HTR2C/HTR2A/P2RX7/ABL1	15
BP	GO:0008306	associative learning	9/130	87/18888	0.103448	15.0302	10.9193	8.5475e-09	4.4447e-07	2.51673e-07	GRIN1/KRAS/KMT2A/APP/GRIN2A/KIT/GABRA5/HIF1A/ABL1	9
BP	GO:0007612	learning	11/130	153/18888	0.0718954	10.4459	9.76607	8.72506e-09	4.47402e-07	2.53333e-07	GRIN1/KRAS/HTT/KMT2A/APP/GRIN2A/KIT/GABRA5/GRM5/HIF1A/ABL1	11
BP	GO:0062012	regulation of small molecule metabolic process	15/130	331/18888	0.0453172	6.58424	8.53266	9.03394e-09	4.56894e-07	2.58708e-07	OGT/NOS1/NCOR2/ADM/TNF/APP/PARP1/KIT/HIF1A/RORA/VCP/HTR2A/TSPO/P2RX7/GCK	15
BP	GO:0070588	calcium ion transmembrane transport	15/130	334/18888	0.0449102	6.5251	8.48115	1.01954e-08	5.0867e-07	2.88025e-07	GRIN2B/GRIN1/NOS1/HTT/GRIN3A/CACNA1B/GRIN2D/GRIN2A/F2R/HTR2C/HTR2A/PDE4B/P2RX7/ABL1/CRHR1	15
BP	GO:2000628	regulation of miRNA metabolic process	9/130	90/18888	0.1	14.5292	10.7102	1.15671e-08	5.69407e-07	3.22416e-07	NCOR2/HRAS/MYCN/TNF/VEGFA/AR/HIF1A/EGFR/TERT	9
BP	GO:0046514	ceramide catabolic process	6/130	25/18888	0.24	34.8702	14.1072	1.50566e-08	7.31433e-07	4.1416e-07	ASAH1/NEU1/GBA1/HEXA/HEXB/PRKCD	6
BP	GO:0051962	positive regulation of nervous system development	14/130	294/18888	0.047619	6.91868	8.51475	1.56242e-08	7.49151e-07	4.24193e-07	L1CAM/SHH/KRAS/AGRN/TNF/VEGFA/KIT/SMO/GRM5/HIF1A/EGFR/MAP2K1/OXTR/TSPO	14
BP	GO:0010518	positive regulation of phospholipase activity	7/130	43/18888	0.162791	23.6522	12.3796	1.63045e-08	7.71746e-07	4.36987e-07	HRAS/FGFR1/FLT1/PDGFRB/KIT/EGFR/HTR2A	7
BP	GO:0050905	neuromuscular process	11/130	165/18888	0.0666667	9.68615	9.32914	1.91929e-08	8.87153e-07	5.02334e-07	GRIN3A/GRIN2D/GBA1/HEXA/HEXB/TNF/APP/GRIN2A/SCN4A/ADORA2A/ABL1	11
BP	GO:0019377	glycolipid catabolic process	6/130	26/18888	0.230769	33.529	13.8173	1.94635e-08	8.87153e-07	5.02334e-07	NEU1/GBA1/NAGA/HEXA/HEXB/PRKCD	6
BP	GO:0048143	astrocyte activation	6/130	26/18888	0.230769	33.529	13.8173	1.94635e-08	8.87153e-07	5.02334e-07	NAGLU/TNF/APP/SMO/EGFR/ADORA2A	6
BP	GO:0050678	regulation of epithelial cell proliferation	16/130	407/18888	0.039312	5.71174	7.99973	2.08285e-08	9.37791e-07	5.31006e-07	NRAS/SHH/HRAS/FGFR1/B4GALT1/TNF/VEGFA/FLT1/SMO/AR/HIF1A/EGFR/PRKCA/SCN5A/CCND1/CDK4	16
BP	GO:0006687	glycosphingolipid metabolic process	8/130	68/18888	0.117647	17.0932	11.0674	2.11878e-08	9.42473e-07	5.33658e-07	ST3GAL3/NEU1/NAGLU/GBA1/HEXA/HEXB/KIT/PRKCD	8
BP	GO:0006665	sphingolipid metabolic process	11/130	167/18888	0.0658683	9.57015	9.26066	2.17506e-08	9.44742e-07	5.34943e-07	CERS1/ASAH1/ST3GAL3/NEU1/NAGLU/GBA1/HEXA/HEXB/KIT/PRKCD/P2RX7	11
BP	GO:0009166	nucleotide catabolic process	11/130	167/18888	0.0658683	9.57015	9.26066	2.17506e-08	9.44742e-07	5.34943e-07	UPB1/OGT/APP/PDE10A/HIF1A/VCP/HTR2A/PDE4A/PDE4B/P2RX7/GCK	11
BP	GO:0045931	positive regulation of mitotic cell cycle	10/130	130/18888	0.0769231	11.1763	9.69236	2.22848e-08	9.56694e-07	5.4171e-07	KMT2E/FGFR1/APP/EGFR/PRKCA/CCND1/CDK4/CCND2/TERT/ABL1	10
BP	GO:0046466	membrane lipid catabolic process	7/130	45/18888	0.155556	22.601	12.0772	2.27002e-08	9.63324e-07	5.45464e-07	ASAH1/NEU1/GBA1/NAGA/HEXA/HEXB/PRKCD	7
BP	GO:0060191	regulation of lipase activity	8/130	69/18888	0.115942	16.8455	10.9772	2.38291e-08	9.99737e-07	5.66083e-07	HRAS/FGFR1/FLT1/PDGFRB/KIT/EGFR/HTR2A/ABL1	8
BP	GO:1904862	inhibitory synapse assembly	6/130	27/18888	0.222222	32.2872	13.5433	2.48839e-08	1.03226e-06	5.84499e-07	GABRB3/GABRA3/GABRG2/GABRA1/GABRA5/GABRA2	6
BP	GO:0070374	positive regulation of ERK1 and ERK2 cascade	12/130	215/18888	0.055814	8.10934	8.72773	3.08761e-08	1.26661e-06	7.17192e-07	HRAS/TNF/APP/FGF23/F2R/PDGFRB/EGFR/PRKCA/MAP2K1/HTR2C/HTR2A/ABL1	12
BP	GO:1901292	nucleoside phosphate catabolic process	11/130	176/18888	0.0625	9.08077	8.96621	3.7427e-08	1.51847e-06	8.59804e-07	UPB1/OGT/APP/PDE10A/HIF1A/VCP/HTR2A/PDE4A/PDE4B/P2RX7/GCK	11
BP	GO:0007214	gamma-aminobutyric acid signaling pathway	6/130	29/18888	0.206897	30.0605	13.0377	3.94847e-08	1.57511e-06	8.91875e-07	GABRB3/GABRA3/GABRG2/GABRA1/GABRA5/GABRA2	6
BP	GO:0050806	positive regulation of synaptic transmission	11/130	177/18888	0.0621469	9.02947	8.9348	3.96763e-08	1.57511e-06	8.91875e-07	GRIN2B/GRIN1/GRIN2D/TNF/APP/GRIN2A/EGFR/ADORA1/ADORA2A/OXTR/ABL1	11
BP	GO:0008542	visual learning	7/130	49/18888	0.142857	20.756	11.5273	4.20003e-08	1.64963e-06	9.34073e-07	GRIN1/KRAS/KMT2A/APP/GRIN2A/KIT/HIF1A	7
BP	GO:0018108	peptidyl-tyrosine phosphorylation	13/130	269/18888	0.0483271	7.02156	8.2807	4.4119e-08	1.7146e-06	9.70862e-07	FGFR1/TNF/APP/VEGFA/FLT1/PDGFRB/KIT/PRKCD/GRM5/EGFR/JAK2/HTR2A/ABL1	13
BP	GO:1902893	regulation of miRNA transcription	8/130	75/18888	0.106667	15.4978	10.4729	4.64497e-08	1.78638e-06	1.0115e-06	NCOR2/MYCN/TNF/VEGFA/AR/HIF1A/EGFR/TERT	8
BP	GO:0018212	peptidyl-tyrosine modification	13/130	271/18888	0.0479705	6.96974	8.24034	4.8125e-08	1.81094e-06	1.02541e-06	FGFR1/TNF/APP/VEGFA/FLT1/PDGFRB/KIT/PRKCD/GRM5/EGFR/JAK2/HTR2A/ABL1	13
BP	GO:0009261	ribonucleotide catabolic process	10/130	141/18888	0.070922	10.3044	9.23194	4.84617e-08	1.81094e-06	1.02541e-06	UPB1/OGT/APP/PDE10A/HIF1A/HTR2A/PDE4A/PDE4B/P2RX7/GCK	10
BP	GO:0007215	glutamate receptor signaling pathway	7/130	50/18888	0.14	20.3409	11.4	4.85598e-08	1.81094e-06	1.02541e-06	GRIN2B/GRIN1/GRIN3A/GRIN2D/APP/GRIN2A/GRM5	7
BP	GO:0061614	miRNA transcription	8/130	76/18888	0.105263	15.2939	10.3944	5.16167e-08	1.90569e-06	1.07906e-06	NCOR2/MYCN/TNF/VEGFA/AR/HIF1A/EGFR/TERT	8
BP	GO:0060079	excitatory postsynaptic potential	9/130	107/18888	0.0841121	12.2208	9.68987	5.32287e-08	1.94575e-06	1.10174e-06	GRIN2B/GRIN1/GRIN2D/APP/GRIN2A/ADORA1/ADORA2A/P2RX7/LRRK2	9
BP	GO:0001659	temperature homeostasis	11/130	183/18888	0.0601093	8.73342	8.75141	5.58828e-08	2.02274e-06	1.14534e-06	PRDM16/OGT/ABAT/EHMT1/TNF/FTO/VEGFA/ADORA1/JAK2/OXTR/HTR2A	11
BP	GO:0003018	vascular process in circulatory system	13/130	275/18888	0.0472727	6.86836	8.16084	5.71347e-08	2.04797e-06	1.15963e-06	NOS1/ADM/TNF/VEGFA/F2R/EGFR/SLC6A9/ABCG2/ADORA1/ADORA2A/OXTR/HTR2A/ABL1	13
BP	GO:0010586	miRNA metabolic process	9/130	108/18888	0.0833333	12.1077	9.63713	5.77332e-08	2.04953e-06	1.16051e-06	NCOR2/HRAS/MYCN/TNF/VEGFA/AR/HIF1A/EGFR/TERT	9
BP	GO:1990806	ligand-gated ion channel signaling pathway	6/130	31/18888	0.193548	28.1211	12.5809	6.05153e-08	2.1161e-06	1.1982e-06	GRIN2B/GRIN1/GRIN3A/GRIN2D/APP/GRIN2A	6
BP	GO:0001819	positive regulation of cytokine production	17/130	500/18888	0.034	4.93994	7.43305	6.07548e-08	2.1161e-06	1.1982e-06	HRAS/SETD2/TNF/APP/RAD21/F2R/KIT/ELANE/HIF1A/RORA/MAPK14/JAK2/PDE4B/CASP1/P2RX7/ABL1/LRRK2	17
BP	GO:0045787	positive regulation of cell cycle	14/130	332/18888	0.0421687	6.12678	7.8457	7.13155e-08	2.43974e-06	1.38146e-06	EZH2/KMT2E/FGFR1/TNF/APP/RAD21/PDGFRB/EGFR/PRKCA/CCND1/CDK4/CCND2/TERT/ABL1	14
BP	GO:0019722	calcium-mediated signaling	12/130	232/18888	0.0517241	7.51512	8.31222	7.13684e-08	2.43974e-06	1.38146e-06	GRIN2B/GRIN1/HTT/GRIN2D/TNF/APP/GRIN2A/PDGFRB/GRM5/HTR2C/P2RX7/LRRK2	12
BP	GO:0060193	positive regulation of lipase activity	7/130	53/18888	0.132075	19.1896	11.0392	7.36665e-08	2.4952e-06	1.41286e-06	HRAS/FGFR1/FLT1/PDGFRB/KIT/EGFR/HTR2A	7
BP	GO:0046434	organophosphate catabolic process	12/130	234/18888	0.0512821	7.45089	8.26611	7.83959e-08	2.63125e-06	1.4899e-06	UPB1/OGT/APP/PDE10A/PRKCD/HIF1A/VCP/HTR2A/PDE4A/PDE4B/P2RX7/GCK	12
BP	GO:0006664	glycolipid metabolic process	9/130	113/18888	0.079646	11.572	9.38349	8.56105e-08	2.82718e-06	1.60084e-06	ST3GAL3/NEU1/NAGLU/GBA1/NAGA/HEXA/HEXB/KIT/PRKCD	9
BP	GO:0051235	maintenance of location	14/130	337/18888	0.041543	6.03588	7.76545	8.5765e-08	2.82718e-06	1.60084e-06	NOS1/HTT/NAGLU/GBA1/HEXA/HEXB/TNF/FTO/F2R/HTR2C/HTR2A/TSPO/P2RX7/ABL1	14
BP	GO:0010959	regulation of metal ion transport	15/130	394/18888	0.0380711	5.53143	7.56708	9.02539e-08	2.94883e-06	1.66972e-06	GRIN1/NOS1/HTT/F2R/PDGFRB/ADORA1/ADORA2A/HTR2A/PDE4B/TSPO/SCN5A/P2RX7/ABL1/GCK/CRHR1	15
BP	GO:0034329	cell junction assembly	16/130	453/18888	0.0353201	5.13174	7.41003	9.13804e-08	2.95944e-06	1.67573e-06	OGT/AGRN/TNF/ACTB/CDH2/APP/VEGFA/GABRB3/GABRA3/GABRG2/GABRA1/GABRA5/GABRA2/PRKCA/OXTR/ABL1	16
BP	GO:1903509	liposaccharide metabolic process	9/130	114/18888	0.0789474	11.4704	9.33467	9.24132e-08	2.96687e-06	1.67993e-06	ST3GAL3/NEU1/NAGLU/GBA1/NAGA/HEXA/HEXB/KIT/PRKCD	9
BP	GO:0035296	regulation of tube diameter	10/130	152/18888	0.0657895	9.5587	8.81965	9.87317e-08	3.11553e-06	1.76411e-06	NOS1/ADM/TNF/F2R/EGFR/ADORA1/ADORA2A/OXTR/HTR2A/ABL1	10
BP	GO:0097746	blood vessel diameter maintenance	10/130	152/18888	0.0657895	9.5587	8.81965	9.87317e-08	3.11553e-06	1.76411e-06	NOS1/ADM/TNF/F2R/EGFR/ADORA1/ADORA2A/OXTR/HTR2A/ABL1	10
BP	GO:0035150	regulation of tube size	10/130	153/18888	0.0653595	9.49623	8.78426	1.05026e-07	3.28606e-06	1.86067e-06	NOS1/ADM/TNF/F2R/EGFR/ADORA1/ADORA2A/OXTR/HTR2A/ABL1	10
BP	GO:0007632	visual behavior	7/130	57/18888	0.122807	17.8429	10.6018	1.23503e-07	3.82411e-06	2.16533e-06	GRIN1/KRAS/KMT2A/APP/GRIN2A/KIT/HIF1A	7
BP	GO:0018209	peptidyl-serine modification	13/130	294/18888	0.0442177	6.42449	7.8038	1.24294e-07	3.82411e-06	2.16533e-06	NOS1/MAPK8/GALNT2/NSD1/TNF/APP/VEGFA/PRKCD/EGFR/PRKCA/MAPK14/RAF1/LRRK2	13
BP	GO:0034765	regulation of monoatomic ion transmembrane transport	14/130	349/18888	0.0401146	5.82834	7.57928	1.31828e-07	4.02238e-06	2.2776e-06	GRIN2B/GRIN1/NOS1/HTT/GRIN2D/GRIN2A/F2R/GRM5/SLC6A9/PDE4B/SCN5A/P2RX7/ABL1/CRHR1	14
BP	GO:0009259	ribonucleotide metabolic process	16/130	466/18888	0.0343348	4.98858	7.25776	1.34327e-07	4.05713e-06	2.29727e-06	UPB1/ATIC/OGT/APP/PARP1/PDE10A/HIF1A/RORA/VCP/HTR2A/PDE4A/PDE4B/TSPO/P2RX7/GCK/LRRK2	16
BP	GO:0050769	positive regulation of neurogenesis	12/130	246/18888	0.0487805	7.08743	8.00046	1.35164e-07	4.05713e-06	2.29727e-06	L1CAM/SHH/KRAS/TNF/VEGFA/KIT/SMO/GRM5/HIF1A/EGFR/MAP2K1/TSPO	12
BP	GO:0007626	locomotory behavior	11/130	202/18888	0.0544554	7.91196	8.22202	1.52779e-07	4.54887e-06	2.57571e-06	ABAT/NAGLU/GRIN2D/HEXA/HEXB/APP/GRM5/ADORA2A/HTR2C/CCND2/LRRK2	11
BP	GO:0051222	positive regulation of protein transport	12/130	251/18888	0.0478088	6.94625	7.89499	1.68082e-07	4.96448e-06	2.81104e-06	SHH/ABAT/TNF/SMO/PRKCD/HIF1A/EGFR/ADORA2A/MAPK14/JAK2/P2RX7/GCK	12
BP	GO:0043524	negative regulation of neuron apoptotic process	10/130	162/18888	0.0617284	8.96866	8.4797	1.79592e-07	5.26233e-06	2.9797e-06	KRAS/HRAS/GBA1/RAD21/F2R/HIF1A/ADORA2A/JAK2/CCND1/TERT	10
BP	GO:0001763	morphogenesis of a branching structure	11/130	206/18888	0.0533981	7.75833	8.11935	1.86226e-07	5.41374e-06	3.06543e-06	SHH/KRAS/FGFR1/SETD2/ADM/TNF/VEGFA/SMO/AR/ABL1/LRRK2	11
BP	GO:0046883	regulation of hormone secretion	12/130	254/18888	0.0472441	6.8642	7.83308	1.91106e-07	5.51221e-06	3.12118e-06	ABAT/FGFR1/TNF/FGF23/HIF1A/EGFR/ADORA1/JAK2/HTR2C/TSPO/GCK/CRHR1	12
BP	GO:0019693	ribose phosphate metabolic process	16/130	480/18888	0.0333333	4.84308	7.09997	2.00489e-07	5.73803e-06	3.24905e-06	UPB1/ATIC/OGT/APP/PARP1/PDE10A/HIF1A/RORA/VCP/HTR2A/PDE4A/PDE4B/TSPO/P2RX7/GCK/LRRK2	16
BP	GO:0007416	synapse assembly	11/130	208/18888	0.0528846	7.68373	8.06904	2.05264e-07	5.8295e-06	3.30085e-06	OGT/AGRN/CDH2/APP/GABRB3/GABRA3/GABRG2/GABRA1/GABRA5/GABRA2/OXTR	11
BP	GO:0097305	response to alcohol	12/130	259/18888	0.046332	6.73169	7.7321	2.35783e-07	6.62051e-06	3.74874e-06	GRIN2B/GRIN1/ABAT/GRIN3A/TNF/GRIN2A/PARP1/SMO/CTSK/TSPO/CDK4/CRHR1	12
BP	GO:0046879	hormone secretion	13/130	311/18888	0.0418006	6.07331	7.51007	2.374e-07	6.62051e-06	3.74874e-06	ABAT/FGFR1/TNF/FGF23/HIF1A/EGFR/ADORA1/JAK2/HTR2C/TSPO/RAF1/GCK/CRHR1	13
BP	GO:0061351	neural precursor cell proliferation	10/130	167/18888	0.0598802	8.70014	8.32055	2.38496e-07	6.62051e-06	3.74874e-06	SHH/ADGRG1/FGFR1/POU3F2/CDH2/VEGFA/SMO/HIF1A/RORA/LRRK2	10
BP	GO:0051899	membrane depolarization	8/130	93/18888	0.0860215	12.4983	9.25364	2.5283e-07	6.96603e-06	3.94439e-06	KMT2A/PARP1/ADORA2A/TSPO/SCN5A/P2RX7/ABL1/LRRK2	8
BP	GO:0030149	sphingolipid catabolic process	6/130	39/18888	0.153846	22.3527	11.1122	2.56341e-07	7.01045e-06	3.96954e-06	ASAH1/NEU1/GBA1/HEXA/HEXB/PRKCD	6
BP	GO:0090068	positive regulation of cell cycle process	12/130	263/18888	0.0456274	6.62931	7.65323	2.77996e-07	7.54678e-06	4.27322e-06	EZH2/KMT2E/FGFR1/TNF/APP/RAD21/PDGFRB/EGFR/CCND1/CDK4/CCND2/TERT	12
BP	GO:0009612	response to mechanical stimulus	11/130	216/18888	0.0509259	7.39915	7.87432	2.99816e-07	8.0797e-06	4.57498e-06	HTT/MAPK8/TNF/CDH2/KIT/EGFR/MAPK14/HTR2A/CASP1/P2RX7/RAF1	11
BP	GO:1905330	regulation of morphogenesis of an epithelium	7/130	65/18888	0.107692	15.6469	9.84729	3.1071e-07	8.31261e-06	4.70686e-06	SHH/FGFR1/TNF/VEGFA/SMO/AR/ABL1	7
BP	GO:0140747	regulation of ncRNA transcription	8/130	97/18888	0.0824742	11.9829	9.0279	3.50631e-07	9.31041e-06	5.27185e-06	NCOR2/MYCN/TNF/VEGFA/AR/HIF1A/EGFR/TERT	8
BP	GO:0009914	hormone transport	13/130	322/18888	0.0403727	5.86584	7.33139	3.53049e-07	9.31041e-06	5.27185e-06	ABAT/FGFR1/TNF/FGF23/HIF1A/EGFR/ADORA1/JAK2/HTR2C/TSPO/RAF1/GCK/CRHR1	13
BP	GO:2000630	positive regulation of miRNA metabolic process	7/130	67/18888	0.104478	15.1798	9.67934	3.83724e-07	1.00476e-05	5.68925e-06	HRAS/MYCN/TNF/AR/HIF1A/EGFR/TERT	7
BP	GO:0009154	purine ribonucleotide catabolic process	9/130	135/18888	0.0666667	9.68615	8.43177	3.94716e-07	1.02626e-05	5.81102e-06	OGT/APP/PDE10A/HIF1A/HTR2A/PDE4A/PDE4B/P2RX7/GCK	9
BP	GO:1904951	positive regulation of establishment of protein localization	13/130	326/18888	0.0398773	5.79387	7.26846	4.06243e-07	1.04885e-05	5.93889e-06	SHH/ABAT/HRAS/TNF/SMO/PRKCD/HIF1A/EGFR/ADORA2A/MAPK14/JAK2/P2RX7/GCK	13
BP	GO:0036293	response to decreased oxygen levels	13/130	327/18888	0.0397554	5.77615	7.25288	4.20615e-07	1.07841e-05	6.1063e-06	NOS1/ABAT/NDRG1/ADM/TNF/VEGFA/RAD21/HIF1A/CASP3/RORA/ADORA1/OXTR/TERT	13
BP	GO:0046479	glycosphingolipid catabolic process	5/130	23/18888	0.217391	31.5853	12.2182	4.35501e-07	1.10887e-05	6.2788e-06	NEU1/GBA1/HEXA/HEXB/PRKCD	5
BP	GO:0009150	purine ribonucleotide metabolic process	15/130	446/18888	0.0336323	4.88651	6.91486	4.42829e-07	1.11981e-05	6.34072e-06	ATIC/OGT/APP/PARP1/PDE10A/HIF1A/RORA/VCP/HTR2A/PDE4A/PDE4B/TSPO/P2RX7/GCK/LRRK2	15
BP	GO:0070371	ERK1 and ERK2 cascade	13/130	332/18888	0.0391566	5.68916	7.17598	4.99532e-07	1.25461e-05	7.10397e-06	HRAS/TNF/APP/FGF23/F2R/PDGFRB/EGFR/PRKCA/MAP2K1/OXTR/HTR2C/HTR2A/ABL1	13
BP	GO:0051651	maintenance of location in cell	11/130	228/18888	0.0482456	7.00972	7.60021	5.13959e-07	1.28212e-05	7.25976e-06	NOS1/HTT/NAGLU/HEXA/HEXB/F2R/HTR2C/HTR2A/TSPO/P2RX7/ABL1	11
BP	GO:0043467	regulation of generation of precursor metabolites and energy	9/130	140/18888	0.0642857	9.34022	8.24563	5.37291e-07	1.33133e-05	7.5384e-06	PRDM16/OGT/TNF/APP/HIF1A/VCP/HTR2A/P2RX7/GCK	9
BP	GO:0018105	peptidyl-serine phosphorylation	12/130	282/18888	0.0425532	6.18265	7.29978	5.85104e-07	1.44014e-05	8.1545e-06	NOS1/MAPK8/NSD1/TNF/APP/VEGFA/PRKCD/EGFR/PRKCA/MAPK14/RAF1/LRRK2	12
BP	GO:0003012	muscle system process	15/130	459/18888	0.0326797	4.74811	6.7675	6.36335e-07	1.55586e-05	8.80977e-06	NOS1/GAMT/EZH2/ABAT/TNF/PARP1/F2R/KIT/SCN4A/PRKCA/ADORA1/OXTR/HTR2A/PDE4B/SCN5A	15
BP	GO:0048169	regulation of long-term neuronal synaptic plasticity	5/130	25/18888	0.2	29.0585	11.6866	6.80083e-07	1.6235e-05	9.19276e-06	KRAS/HRAS/APP/KIT/GRM5	5
BP	GO:0051882	mitochondrial depolarization	5/130	25/18888	0.2	29.0585	11.6866	6.80083e-07	1.6235e-05	9.19276e-06	PARP1/TSPO/P2RX7/ABL1/LRRK2	5
BP	GO:0006195	purine nucleotide catabolic process	9/130	144/18888	0.0625	9.08077	8.10331	6.81588e-07	1.6235e-05	9.19276e-06	OGT/APP/PDE10A/HIF1A/HTR2A/PDE4A/PDE4B/P2RX7/GCK	9
BP	GO:0030534	adult behavior	9/130	144/18888	0.0625	9.08077	8.10331	6.81588e-07	1.6235e-05	9.19276e-06	ABAT/NAGLU/GRIN2D/HEXA/APP/GABRG2/HTR2A/CCND2/CRHR1	9
BP	GO:0051881	regulation of mitochondrial membrane potential	7/130	74/18888	0.0945946	13.7439	9.144	7.62991e-07	1.80575e-05	1.02247e-05	PARP1/VCP/ADORA2A/TSPO/P2RX7/ABL1/LRRK2	7
BP	GO:0051098	regulation of binding	11/130	238/18888	0.0462185	6.71519	7.38652	7.85852e-07	1.83631e-05	1.03977e-05	PRMT7/MAPK8/NSD1/ACTB/APP/SMO/PRKCD/JAK2/TERT/ABL1/LRRK2	11
BP	GO:0072593	reactive oxygen species metabolic process	11/130	238/18888	0.0462185	6.71519	7.38652	7.85852e-07	1.83631e-05	1.03977e-05	GRIN1/NAGLU/TNF/PDGFRB/PRKCD/HIF1A/EGFR/MAPK14/TSPO/P2RX7/LRRK2	11
BP	GO:0051960	regulation of nervous system development	15/130	468/18888	0.0320513	4.6568	6.66868	8.1191e-07	1.88527e-05	1.0675e-05	L1CAM/SHH/EZH2/KRAS/AGRN/TNF/VEGFA/KIT/SMO/GRM5/HIF1A/EGFR/MAP2K1/OXTR/TSPO	15
BP	GO:0021543	pallium development	10/130	191/18888	0.052356	7.60693	7.63994	8.23257e-07	1.89967e-05	1.07565e-05	ATIC/EZH2/ADGRG1/POMGNT1/POU3F2/CDH2/SMO/HIF1A/EGFR/CASP3	10
BP	GO:0072523	purine-containing compound catabolic process	9/130	149/18888	0.0604027	8.77605	7.93302	9.08218e-07	2.06984e-05	1.17201e-05	OGT/APP/PDE10A/HIF1A/HTR2A/PDE4A/PDE4B/P2RX7/GCK	9
BP	GO:2000377	regulation of reactive oxygen species metabolic process	9/130	149/18888	0.0604027	8.77605	7.93302	9.08218e-07	2.06984e-05	1.17201e-05	GRIN1/TNF/PDGFRB/PRKCD/HIF1A/EGFR/MAPK14/TSPO/LRRK2	9
BP	GO:0001890	placenta development	9/130	150/18888	0.06	8.71754	7.89992	9.60628e-07	2.17077e-05	1.22916e-05	SETD2/ASH1L/ADM/PARP1/HIF1A/EGFR/MAPK14/MAP2K1/CTSB	9
BP	GO:0050807	regulation of synapse organization	11/130	243/18888	0.0452675	6.57702	7.28423	9.64263e-07	2.17077e-05	1.22916e-05	GRIN2B/OGT/AGRN/TNF/CDH2/APP/VCP/MAPK14/OXTR/ABL1/LRRK2	11
BP	GO:0090398	cellular senescence	8/130	111/18888	0.0720721	10.4715	8.33159	9.88441e-07	2.21171e-05	1.25234e-05	MAPK8/HRAS/MAPK10/PRKCD/MAPK14/MAP2K1/TERT/ABL1	8
BP	GO:0098976	excitatory chemical synaptic transmission	4/130	12/18888	0.333333	48.4308	13.6822	1.01616e-06	2.26004e-05	1.27971e-05	GRIN2B/GRIN1/GRIN2D/GRIN2A	4
BP	GO:0070482	response to oxygen levels	13/130	354/18888	0.0367232	5.33559	6.85528	1.02772e-06	2.27207e-05	1.28652e-05	NOS1/ABAT/NDRG1/ADM/TNF/VEGFA/RAD21/HIF1A/CASP3/RORA/ADORA1/OXTR/TERT	13
BP	GO:0098815	modulation of excitatory postsynaptic potential	6/130	49/18888	0.122449	17.7909	9.79722	1.03856e-06	2.28235e-05	1.29234e-05	GRIN2B/GRIN1/GRIN2D/APP/GRIN2A/LRRK2	6
BP	GO:0090257	regulation of muscle system process	11/130	245/18888	0.044898	6.52333	7.24412	1.04506e-06	2.28306e-05	1.29274e-05	NOS1/ABAT/PARP1/F2R/KIT/SCN4A/PRKCA/ADORA1/OXTR/PDE4B/SCN5A	11
BP	GO:0051924	regulation of calcium ion transport	11/130	247/18888	0.0445344	6.47051	7.20446	1.13176e-06	2.45792e-05	1.39175e-05	GRIN1/NOS1/HTT/F2R/PDGFRB/ADORA2A/PDE4B/TSPO/P2RX7/ABL1/CRHR1	11
BP	GO:0048863	stem cell differentiation	11/130	248/18888	0.0443548	6.44442	7.18479	1.17744e-06	2.54033e-05	1.43841e-05	SHH/EZH2/FGFR1/SETD2/SETD1A/CDH2/KIT/SMO/HIF1A/MAPK14/ABL1	11
BP	GO:0009411	response to UV	9/130	154/18888	0.0584416	8.49111	7.77054	1.19731e-06	2.54033e-05	1.43841e-05	CERS1/MAPK8/PARP1/ELANE/PRKCD/EGFR/CASP3/MAPK14/CCND1	9
BP	GO:0042552	myelination	9/130	154/18888	0.0584416	8.49111	7.77054	1.19731e-06	2.54033e-05	1.43841e-05	HRAS/POMGNT1/POU3F2/HEXA/HEXB/NDRG1/TNF/MAP2K1/RAF1	9
BP	GO:1903829	positive regulation of protein localization	15/130	483/18888	0.0310559	4.51218	6.50943	1.20336e-06	2.54033e-05	1.43841e-05	SHH/ABAT/HRAS/TNF/PARP1/SMO/PRKCD/HIF1A/EGFR/ADORA2A/MAPK14/JAK2/P2RX7/TERT/GCK	15
BP	GO:0006874	intracellular calcium ion homeostasis	12/130	302/18888	0.0397351	5.7732	6.96114	1.20457e-06	2.54033e-05	1.43841e-05	NOS1/HTT/HEXB/APP/F2R/ELANE/GRM5/ADORA1/HTR2C/HTR2A/P2RX7/ABL1	12
BP	GO:0042752	regulation of circadian rhythm	8/130	114/18888	0.0701754	10.196	8.19843	1.21099e-06	2.54033e-05	1.43841e-05	EZH2/MAPK8/MAPK10/PARP1/RORB/RORA/ADORA1/ADORA2A	8
BP	GO:0050803	regulation of synapse structure or activity	11/130	249/18888	0.0441767	6.41854	7.16523	1.22474e-06	2.55465e-05	1.44653e-05	GRIN2B/OGT/AGRN/TNF/CDH2/APP/VCP/MAPK14/OXTR/ABL1/LRRK2	11
BP	GO:0001573	ganglioside metabolic process	5/130	28/18888	0.178571	25.9451	10.9965	1.23736e-06	2.56649e-05	1.45323e-05	ST3GAL3/NEU1/NAGLU/HEXA/HEXB	5
BP	GO:0006110	regulation of glycolytic process	6/130	51/18888	0.117647	17.0932	9.58036	1.32257e-06	2.69022e-05	1.52329e-05	OGT/APP/HIF1A/HTR2A/P2RX7/GCK	6
BP	GO:0030811	regulation of nucleotide catabolic process	6/130	51/18888	0.117647	17.0932	9.58036	1.32257e-06	2.69022e-05	1.52329e-05	OGT/APP/HIF1A/HTR2A/P2RX7/GCK	6
BP	GO:0033121	regulation of purine nucleotide catabolic process	6/130	51/18888	0.117647	17.0932	9.58036	1.32257e-06	2.69022e-05	1.52329e-05	OGT/APP/HIF1A/HTR2A/P2RX7/GCK	6
BP	GO:0007272	ensheathment of neurons	9/130	156/18888	0.0576923	8.38225	7.70759	1.33345e-06	2.69022e-05	1.52329e-05	HRAS/POMGNT1/POU3F2/HEXA/HEXB/NDRG1/TNF/MAP2K1/RAF1	9
BP	GO:0008366	axon ensheathment	9/130	156/18888	0.0576923	8.38225	7.70759	1.33345e-06	2.69022e-05	1.52329e-05	HRAS/POMGNT1/POU3F2/HEXA/HEXB/NDRG1/TNF/MAP2K1/RAF1	9
BP	GO:0019233	sensory perception of pain	7/130	81/18888	0.0864198	12.5561	8.67671	1.41664e-06	2.84252e-05	1.60953e-05	GRIN2D/TNF/GRIN2A/F2R/ADORA1/HTR2A/P2RX7	7
BP	GO:1901989	positive regulation of cell cycle phase transition	8/130	117/18888	0.0683761	9.93452	8.07012	1.47491e-06	2.91961e-05	1.65317e-05	EZH2/KMT2E/APP/EGFR/CCND1/CDK4/CCND2/TERT	8
BP	GO:0070372	regulation of ERK1 and ERK2 cascade	12/130	308/18888	0.038961	5.66074	6.86542	1.47955e-06	2.91961e-05	1.65317e-05	HRAS/TNF/APP/FGF23/F2R/PDGFRB/EGFR/PRKCA/MAP2K1/HTR2C/HTR2A/ABL1	12
BP	GO:0016052	carbohydrate catabolic process	9/130	158/18888	0.056962	8.27614	7.64576	1.48277e-06	2.91961e-05	1.65317e-05	OGT/NEU1/NAGA/HEXB/APP/HIF1A/HTR2A/P2RX7/GCK	9
BP	GO:0021695	cerebellar cortex development	6/130	52/18888	0.115385	16.7645	9.47649	1.48669e-06	2.91961e-05	1.65317e-05	EZH2/NAGLU/GBA1/SMO/RORA/MAP2K1	6
BP	GO:0042692	muscle cell differentiation	14/130	428/18888	0.0327103	4.75255	6.53721	1.52484e-06	2.97386e-05	1.68389e-05	NOS1/SHH/EZH2/KRAS/NAGLU/ADM/CDH2/VEGFA/PDGFRB/KIT/SMO/CASP3/RORA/MAPK14	14
BP	GO:1904062	regulation of monoatomic cation transmembrane transport	12/130	309/18888	0.038835	5.64242	6.84971	1.53043e-06	2.97386e-05	1.68389e-05	GRIN2B/GRIN1/NOS1/HTT/GRIN2D/GRIN2A/F2R/PDE4B/SCN5A/P2RX7/ABL1/CRHR1	12
BP	GO:0042060	wound healing	14/130	430/18888	0.0325581	4.73045	6.51422	1.61055e-06	3.11316e-05	1.76277e-05	SHH/HRAS/B4GALT1/TNF/ACTB/VEGFA/F2R/PRKCD/HIF1A/PRKCA/ADORA2A/MAPK14/JAK2/RAF1	14
BP	GO:0062197	cellular response to chemical stress	12/130	311/18888	0.0385852	5.60613	6.8185	1.63684e-06	3.1475e-05	1.78222e-05	EZH2/MAPK8/NAGLU/PARP1/PRKCD/HIF1A/EGFR/CASP3/CASP1/TSPO/ABL1/LRRK2	12
BP	GO:0001666	response to hypoxia	12/130	313/18888	0.0383387	5.57031	6.78756	1.74975e-06	3.34719e-05	1.89528e-05	NOS1/ABAT/NDRG1/ADM/TNF/VEGFA/RAD21/HIF1A/CASP3/RORA/ADORA1/TERT	12
BP	GO:0001894	tissue homeostasis	11/130	259/18888	0.042471	6.17072	6.97534	1.79791e-06	3.40404e-05	1.92748e-05	KRAS/NAGLU/KMT2A/ACTB/VEGFA/F2R/SMO/CTSK/EGFR/PRKCA/P2RX7	11
BP	GO:0060249	anatomical structure homeostasis	11/130	259/18888	0.042471	6.17072	6.97534	1.79791e-06	3.40404e-05	1.92748e-05	KRAS/NAGLU/KMT2A/ACTB/VEGFA/F2R/SMO/CTSK/EGFR/PRKCA/P2RX7	11
BP	GO:0043434	response to peptide hormone	14/130	438/18888	0.0319635	4.64405	6.42366	1.9981e-06	3.73435e-05	2.11451e-05	OGT/HRAS/YWHAG/ADM/PARP1/PRKCD/CTSK/PRKCA/MAPK14/JAK2/OXTR/RAF1/GCK/CRHR1	14
BP	GO:1901653	cellular response to peptide	13/130	376/18888	0.0345745	5.0234	6.56026	2.00706e-06	3.73435e-05	2.11451e-05	OGT/HRAS/YWHAG/TNF/APP/PARP1/PRKCD/GRM5/PRKCA/JAK2/RAF1/GCK/CRHR1	13
BP	GO:1903522	regulation of blood circulation	11/130	262/18888	0.0419847	6.10006	6.92032	2.01054e-06	3.73435e-05	2.11451e-05	NOS1/ADM/TNF/F2R/EGFR/ADORA1/OXTR/HTR2A/PDE4B/SCN5A/ABL1	11
BP	GO:0045471	response to ethanol	8/130	122/18888	0.0655738	9.52736	7.86627	2.02366e-06	3.73435e-05	2.11451e-05	GRIN2B/GRIN1/ABAT/GRIN3A/TNF/GRIN2A/CTSK/CRHR1	8
BP	GO:0043270	positive regulation of monoatomic ion transport	10/130	211/18888	0.0473934	6.88589	7.15747	2.03118e-06	3.73435e-05	2.11451e-05	GRIN1/NOS1/HTT/F2R/PDGFRB/ADORA1/TSPO/SCN5A/P2RX7/ABL1	10
BP	GO:0106070	regulation of adenylate cyclase-activating G protein-coupled receptor signaling pathway	4/130	14/18888	0.285714	41.5121	12.6234	2.03306e-06	3.73435e-05	2.11451e-05	NOS1/PRKCA/PDE4A/PDE4B	4
BP	GO:0044706	multi-multicellular organism process	10/130	212/18888	0.0471698	6.85341	7.13502	2.11943e-06	3.87373e-05	2.19343e-05	B4GALT1/HEXB/ASH1L/ADM/VEGFA/PARP1/AR/OXTR/CRHR1/CTSB	10
BP	GO:1902895	positive regulation of miRNA transcription	6/130	56/18888	0.107143	15.567	9.08818	2.31827e-06	4.21629e-05	2.38739e-05	MYCN/TNF/AR/HIF1A/EGFR/TERT	6
BP	GO:0006937	regulation of muscle contraction	9/130	167/18888	0.0538922	7.83012	7.38044	2.34734e-06	4.24822e-05	2.40548e-05	NOS1/ABAT/F2R/KIT/SCN4A/ADORA1/OXTR/PDE4B/SCN5A	9
BP	GO:0007204	positive regulation of cytosolic calcium ion concentration	9/130	169/18888	0.0532544	7.73746	7.32417	2.58966e-06	4.64127e-05	2.62803e-05	GRIN1/NOS1/ADM/F2R/JAK2/OXTR/HTR2A/P2RX7/ABL1	9
BP	GO:0015698	inorganic anion transport	9/130	169/18888	0.0532544	7.73746	7.32417	2.58966e-06	4.64127e-05	2.62803e-05	FGFR1/FGF23/GABRB3/GABRA3/GABRG2/GABRA1/GABRA5/GABRA2/TSPO	9
BP	GO:0009100	glycoprotein metabolic process	13/130	386/18888	0.0336788	4.89326	6.43366	2.67876e-06	4.77777e-05	2.70532e-05	OGT/MGAT2/PORCN/ST3GAL3/NAGLU/DPAGT1/GALNT2/POMGNT1/B4GALT1/NGLY1/HEXA/HEXB/HIF1A	13
BP	GO:0045907	positive regulation of vasoconstriction	5/130	33/18888	0.151515	22.014	10.058	2.90683e-06	5.15961e-05	2.92154e-05	F2R/EGFR/OXTR/HTR2A/ABL1	5
BP	GO:0048638	regulation of developmental growth	12/130	330/18888	0.0363636	5.28336	6.53485	3.02407e-06	5.33021e-05	3.01813e-05	L1CAM/GAMT/FGFR1/AGRN/POU3F2/FTO/APP/VEGFA/SMO/AR/MAPK14/ABL1	12
BP	GO:0010720	positive regulation of cell development	14/130	454/18888	0.030837	4.48038	6.24892	3.03181e-06	5.33021e-05	3.01813e-05	L1CAM/SHH/KRAS/TNF/ACTB/VEGFA/KIT/SMO/GRM5/HIF1A/EGFR/PRKCA/MAP2K1/TSPO	14
BP	GO:0043393	regulation of protein binding	8/130	130/18888	0.0615385	8.94107	7.5634	3.26025e-06	5.6791e-05	3.21568e-05	PRMT7/MAPK8/ACTB/APP/PRKCD/TERT/ABL1/LRRK2	8
BP	GO:0050767	regulation of neurogenesis	13/130	393/18888	0.0330789	4.80611	6.34761	3.26102e-06	5.6791e-05	3.21568e-05	L1CAM/SHH/EZH2/KRAS/TNF/VEGFA/KIT/SMO/GRM5/HIF1A/EGFR/MAP2K1/TSPO	13
BP	GO:0014009	glial cell proliferation	6/130	60/18888	0.1	14.5292	8.73789	3.4951e-06	6.05817e-05	3.43033e-05	SHH/KRAS/GBA1/TNF/EGFR/TSPO	6
BP	GO:2001233	regulation of apoptotic signaling pathway	13/130	396/18888	0.0328283	4.7697	6.31135	3.54317e-06	6.1128e-05	3.46126e-05	HTT/FGFR1/TNF/PARP1/PRKCD/AR/CTSK/HIF1A/ADORA2A/JAK2/RAF1/TERT/LRRK2	13
BP	GO:0007589	body fluid secretion	7/130	93/18888	0.0752688	10.936	7.99633	3.60469e-06	6.14171e-05	3.47763e-05	NCOR2/VEGFA/HIF1A/EGFR/ADORA1/OXTR/CCND1	7
BP	GO:0050730	regulation of peptidyl-tyrosine phosphorylation	10/130	225/18888	0.0444444	6.45744	6.85566	3.60984e-06	6.14171e-05	3.47763e-05	TNF/APP/VEGFA/KIT/PRKCD/GRM5/EGFR/JAK2/HTR2A/ABL1	10
BP	GO:0071222	cellular response to lipopolysaccharide	10/130	225/18888	0.0444444	6.45744	6.85566	3.60984e-06	6.14171e-05	3.47763e-05	MAPK8/TNF/PRKCA/MAPK14/JAK2/PDE4B/CASP1/TSPO/CDK4/ABL1	10
BP	GO:0034349	glial cell apoptotic process	4/130	16/18888	0.25	36.3231	11.7671	3.65719e-06	6.19373e-05	3.50708e-05	RAD21/PRKCD/CASP3/PRKCA	4
BP	GO:0000423	mitophagy	6/130	61/18888	0.0983607	14.291	8.65553	3.85465e-06	6.41152e-05	3.6304e-05	OGT/CERS1/HTT/CTSK/HIF1A/TSPO	6
BP	GO:0043470	regulation of carbohydrate catabolic process	6/130	61/18888	0.0983607	14.291	8.65553	3.85465e-06	6.41152e-05	3.6304e-05	OGT/APP/HIF1A/HTR2A/P2RX7/GCK	6
BP	GO:0048545	response to steroid hormone	12/130	338/18888	0.035503	5.15831	6.42189	3.8669e-06	6.41152e-05	3.6304e-05	KMT2D/NCOR2/GBA1/ADM/TNF/PARP1/AR/EGFR/CASP3/JAK2/OXTR/TSPO	12
BP	GO:0051952	regulation of amine transport	7/130	94/18888	0.0744681	10.8196	7.94529	3.87261e-06	6.41152e-05	3.6304e-05	ABAT/TNF/ADORA1/ADORA2A/OXTR/HTR2A/P2RX7	7
BP	GO:1900182	positive regulation of protein localization to nucleus	7/130	94/18888	0.0744681	10.8196	7.94529	3.87261e-06	6.41152e-05	3.6304e-05	SHH/PARP1/SMO/PRKCD/MAPK14/JAK2/TERT	7
BP	GO:0035640	exploration behavior	5/130	35/18888	0.142857	20.756	9.73876	3.9324e-06	6.45263e-05	3.65368e-05	ABAT/NAGLU/KMT2A/LRRK2/CRHR1	5
BP	GO:0048873	homeostasis of number of cells within a tissue	5/130	35/18888	0.142857	20.756	9.73876	3.9324e-06	6.45263e-05	3.65368e-05	KRAS/KMT2A/F2R/SMO/P2RX7	5
BP	GO:0030879	mammary gland development	8/130	135/18888	0.0592593	8.60991	7.38705	4.32028e-06	7.05774e-05	3.99631e-05	NCOR2/VEGFA/SMO/AR/HIF1A/JAK2/OXTR/CCND1	8
BP	GO:0035270	endocrine system development	8/130	137/18888	0.0583942	8.48422	7.31905	4.81934e-06	7.83833e-05	4.43831e-05	SHH/POU3F2/CDH2/SMO/MAP2K1/TSPO/RAF1/CRHR1	8
BP	GO:0050954	sensory perception of mechanical stimulus	9/130	185/18888	0.0486486	7.06827	6.90487	5.43231e-06	8.79653e-05	4.98087e-05	POMGNT1/FGFR1/FBXO11/HEXA/HEXB/TNF/KIT/CASP3/HTR2A	9
BP	GO:1901992	positive regulation of mitotic cell cycle phase transition	7/130	99/18888	0.0707071	10.2732	7.70114	5.4743e-06	8.82581e-05	4.99745e-05	KMT2E/APP/EGFR/CCND1/CDK4/CCND2/TERT	7
BP	GO:0030225	macrophage differentiation	6/130	65/18888	0.0923077	13.4116	8.34449	5.60666e-06	8.9999e-05	5.09603e-05	NAGLU/GBA1/APP/VEGFA/PARP1/PRKCA	6
BP	GO:0071219	cellular response to molecule of bacterial origin	10/130	238/18888	0.0420168	6.10472	6.59752	5.93787e-06	9.43593e-05	5.34292e-05	MAPK8/TNF/PRKCA/MAPK14/JAK2/PDE4B/CASP1/TSPO/CDK4/ABL1	10
BP	GO:0031281	positive regulation of cyclase activity	5/130	38/18888	0.131579	19.1174	9.30662	5.98052e-06	9.43593e-05	5.34292e-05	NOS1/MAPK8/MAPK14/RAF1/CRHR1	5
BP	GO:0045981	positive regulation of nucleotide metabolic process	5/130	38/18888	0.131579	19.1174	9.30662	5.98052e-06	9.43593e-05	5.34292e-05	NOS1/APP/VCP/HTR2A/P2RX7	5
BP	GO:1900544	positive regulation of purine nucleotide metabolic process	5/130	38/18888	0.131579	19.1174	9.30662	5.98052e-06	9.43593e-05	5.34292e-05	NOS1/APP/VCP/HTR2A/P2RX7	5
BP	GO:0031100	animal organ regeneration	6/130	66/18888	0.0909091	13.2084	8.27099	6.13276e-06	9.63496e-05	5.45562e-05	ATIC/EZH2/ADM/TNF/EGFR/CCND1	6
BP	GO:0062013	positive regulation of small molecule metabolic process	8/130	142/18888	0.056338	8.18548	7.15493	6.28511e-06	9.83247e-05	5.56745e-05	NOS1/ADM/TNF/APP/VCP/HTR2A/P2RX7/GCK	8
BP	GO:0006936	muscle contraction	12/130	355/18888	0.0338028	4.91129	6.19329	6.37382e-06	9.92917e-05	5.62221e-05	NOS1/GAMT/ABAT/TNF/F2R/KIT/SCN4A/ADORA1/OXTR/HTR2A/PDE4B/SCN5A	12
BP	GO:0061138	morphogenesis of a branching epithelium	9/130	189/18888	0.047619	6.91868	6.8078	6.46278e-06	0.000100255	5.67673e-05	SHH/KRAS/FGFR1/ADM/TNF/VEGFA/SMO/AR/ABL1	9
BP	GO:0002274	myeloid leukocyte activation	10/130	241/18888	0.0414938	6.02873	6.54067	6.63042e-06	0.00010227	5.79082e-05	KMT2E/NAGLU/NDRG1/TNF/APP/KIT/PRKCD/RORA/JAK2/LRRK2	10
BP	GO:0000422	autophagy of mitochondrion	7/130	102/18888	0.0686275	9.97104	7.56285	6.67578e-06	0.00010227	5.79082e-05	OGT/CERS1/HTT/GBA1/CTSK/HIF1A/TSPO	7
BP	GO:2000177	regulation of neural precursor cell proliferation	7/130	102/18888	0.0686275	9.97104	7.56285	6.67578e-06	0.00010227	5.79082e-05	SHH/ADGRG1/CDH2/VEGFA/SMO/HIF1A/LRRK2	7
BP	GO:2000116	regulation of cysteine-type endopeptidase activity	9/130	190/18888	0.0473684	6.88227	6.78397	6.74512e-06	0.000102905	5.82679e-05	GRIN2B/TNF/VEGFA/GRIN2A/F2R/VCP/JAK2/CASP1/RAF1	9
BP	GO:0031667	response to nutrient levels	14/130	490/18888	0.0285714	4.15121	5.88369	7.26891e-06	0.000109639	6.2081e-05	OGT/HNRNPA1/MAPK8/GBA1/YWHAG/ADM/TNF/FGF23/CTSK/EGFR/MAPK14/HTR2C/TSPO/LRRK2	14
BP	GO:0009311	oligosaccharide metabolic process	6/130	68/18888	0.0882353	12.8199	8.12866	7.3053e-06	0.000109639	6.2081e-05	MGAT2/ST3GAL3/NEU1/B4GALT1/NAGA/HEXB	6
BP	GO:0046513	ceramide biosynthetic process	6/130	68/18888	0.0882353	12.8199	8.12866	7.3053e-06	0.000109639	6.2081e-05	CERS1/ASAH1/ST3GAL3/GBA1/PRKCD/P2RX7	6
BP	GO:1902808	positive regulation of cell cycle G1/S phase transition	6/130	68/18888	0.0882353	12.8199	8.12866	7.3053e-06	0.000109639	6.2081e-05	EZH2/KMT2E/EGFR/CCND1/CCND2/TERT	6
BP	GO:0046777	protein autophosphorylation	9/130	192/18888	0.046875	6.81058	6.73683	7.34162e-06	0.000109738	6.2137e-05	FGFR1/VEGFA/FLT1/PDGFRB/KIT/EGFR/JAK2/ABL1/LRRK2	9
BP	GO:0009205	purine ribonucleoside triphosphate metabolic process	10/130	244/18888	0.0409836	5.9546	6.48476	7.39183e-06	0.000110043	6.23098e-05	OGT/APP/PARP1/HIF1A/VCP/HTR2A/TSPO/P2RX7/GCK/LRRK2	10
BP	GO:0050727	regulation of inflammatory response	13/130	425/18888	0.0305882	4.44424	5.97855	7.6077e-06	0.000112802	6.38718e-05	GBA1/ASH1L/TNF/APP/ELANE/PRKCD/RORA/ADORA1/ADORA2A/MAPK14/JAK2/CASP1/LRRK2	13
BP	GO:0098781	ncRNA transcription	8/130	146/18888	0.0547945	7.96122	7.02933	7.71426e-06	0.000113924	6.45075e-05	NCOR2/MYCN/TNF/VEGFA/AR/HIF1A/EGFR/TERT	8
BP	GO:0042307	positive regulation of protein import into nucleus	5/130	40/18888	0.125	18.1615	9.0451	7.75409e-06	0.000114056	6.45821e-05	SHH/SMO/PRKCD/MAPK14/JAK2	5
BP	GO:0019229	regulation of vasoconstriction	6/130	69/18888	0.0869565	12.6341	8.05971	7.95622e-06	0.000116565	6.60027e-05	ADM/F2R/EGFR/OXTR/HTR2A/ABL1	6
BP	GO:0015837	amine transport	7/130	105/18888	0.0666667	9.68615	7.43018	8.08873e-06	0.000118038	6.68367e-05	ABAT/TNF/ADORA1/ADORA2A/OXTR/HTR2A/P2RX7	7
BP	GO:0002790	peptide secretion	10/130	247/18888	0.0404858	5.88228	6.42978	8.22777e-06	0.000119594	6.7718e-05	ABAT/TNF/HIF1A/EGFR/ADORA1/JAK2/HTR2C/RAF1/GCK/CRHR1	10
BP	GO:2000379	positive regulation of reactive oxygen species metabolic process	6/130	70/18888	0.0857143	12.4536	7.99218	8.65336e-06	0.000125287	7.09415e-05	GRIN1/PDGFRB/PRKCD/EGFR/MAPK14/TSPO	6
BP	GO:0007188	adenylate cyclase-modulating G protein-coupled receptor signaling pathway	10/130	249/18888	0.0401606	5.83503	6.39363	8.82941e-06	0.000127337	7.2102e-05	NOS1/ADGRG1/ADM/GRM5/PRKCA/ADORA1/ADORA2A/PDE4A/PDE4B/CRHR1	10
BP	GO:0009144	purine nucleoside triphosphate metabolic process	10/130	250/18888	0.04	5.81169	6.3757	9.14423e-06	0.000131364	7.43823e-05	OGT/APP/PARP1/HIF1A/VCP/HTR2A/TSPO/P2RX7/GCK/LRRK2	10
BP	GO:0009199	ribonucleoside triphosphate metabolic process	10/130	251/18888	0.0398406	5.78854	6.35787	9.4687e-06	0.000134294	7.60412e-05	OGT/APP/PARP1/HIF1A/VCP/HTR2A/TSPO/P2RX7/GCK/LRRK2	10
BP	GO:0033002	muscle cell proliferation	10/130	251/18888	0.0398406	5.78854	6.35787	9.4687e-06	0.000134294	7.60412e-05	SHH/FGFR1/TNF/PDGFRB/ELANE/EGFR/MAPK14/JAK2/TERT/ABL1	10
BP	GO:0051900	regulation of mitochondrial depolarization	4/130	20/18888	0.2	29.0585	10.4514	9.53004e-06	0.000134294	7.60412e-05	PARP1/TSPO/P2RX7/LRRK2	4
BP	GO:0060749	mammary gland alveolus development	4/130	20/18888	0.2	29.0585	10.4514	9.53004e-06	0.000134294	7.60412e-05	VEGFA/AR/HIF1A/CCND1	4
BP	GO:0061377	mammary gland lobule development	4/130	20/18888	0.2	29.0585	10.4514	9.53004e-06	0.000134294	7.60412e-05	VEGFA/AR/HIF1A/CCND1	4
BP	GO:0060291	long-term synaptic potentiation	7/130	108/18888	0.0648148	9.41709	7.30275	9.74149e-06	0.000136751	7.74329e-05	GRIN2B/GRIN2D/APP/GRIN2A/ADORA1/ADORA2A/ABL1	7
BP	GO:0014044	Schwann cell development	5/130	42/18888	0.119048	17.2967	8.80187	9.91459e-06	0.000138131	7.8214e-05	HRAS/POU3F2/NDRG1/MAP2K1/RAF1	5
BP	GO:0060251	regulation of glial cell proliferation	5/130	42/18888	0.119048	17.2967	8.80187	9.91459e-06	0.000138131	7.8214e-05	SHH/KRAS/TNF/EGFR/TSPO	5
BP	GO:0051341	regulation of oxidoreductase activity	6/130	72/18888	0.0833333	12.1077	7.86115	1.01962e-05	0.000141065	7.98754e-05	TNF/FGF23/HIF1A/EGFR/TERT/ABL1	6
BP	GO:0031099	regeneration	9/130	200/18888	0.045	6.53815	6.55479	1.02016e-05	0.000141065	7.98754e-05	ATIC/EZH2/ADM/TNF/EGFR/JAK2/MAP2K1/TSPO/CCND1	9
BP	GO:0042886	amide transport	11/130	312/18888	0.0352564	5.12249	6.11252	1.06352e-05	0.000146512	8.29598e-05	ABAT/TNF/HIF1A/EGFR/ABCG2/ADORA1/JAK2/HTR2C/RAF1/GCK/CRHR1	11
BP	GO:0030099	myeloid cell differentiation	13/130	439/18888	0.0296128	4.30251	5.8284	1.07529e-05	0.000147582	8.35657e-05	KMT2E/NAGLU/GBA1/TNF/APP/VEGFA/PARP1/KIT/HIF1A/CASP3/PRKCA/MAPK14/JAK2	13
BP	GO:0051146	striated muscle cell differentiation	11/130	313/18888	0.0351438	5.10612	6.09817	1.09589e-05	0.000148713	8.42061e-05	NOS1/SHH/EZH2/KRAS/NAGLU/CDH2/VEGFA/PDGFRB/SMO/CASP3/MAPK14	11
BP	GO:0032611	interleukin-1 beta production	7/130	110/18888	0.0636364	9.24587	7.22052	1.09918e-05	0.000148713	8.42061e-05	TNF/APP/RAD21/F2R/JAK2/CASP1/P2RX7	7
BP	GO:0032651	regulation of interleukin-1 beta production	7/130	110/18888	0.0636364	9.24587	7.22052	1.09918e-05	0.000148713	8.42061e-05	TNF/APP/RAD21/F2R/JAK2/CASP1/P2RX7	7
BP	GO:0051223	regulation of protein transport	13/130	440/18888	0.0295455	4.29273	5.81791	1.10161e-05	0.000148713	8.42061e-05	SHH/ABAT/TNF/F2R/SMO/PRKCD/HIF1A/EGFR/ADORA2A/MAPK14/JAK2/P2RX7/GCK	13
BP	GO:0007595	lactation	5/130	43/18888	0.116279	16.8945	8.68644	1.11575e-05	0.000148713	8.42061e-05	NCOR2/VEGFA/HIF1A/OXTR/CCND1	5
BP	GO:0032768	regulation of monooxygenase activity	5/130	43/18888	0.116279	16.8945	8.68644	1.11575e-05	0.000148713	8.42061e-05	TNF/FGF23/HIF1A/EGFR/TERT	5
BP	GO:0051353	positive regulation of oxidoreductase activity	5/130	43/18888	0.116279	16.8945	8.68644	1.11575e-05	0.000148713	8.42061e-05	TNF/FGF23/HIF1A/TERT/ABL1	5
BP	GO:0051955	regulation of amino acid transport	5/130	43/18888	0.116279	16.8945	8.68644	1.11575e-05	0.000148713	8.42061e-05	ABAT/TNF/ADORA1/ADORA2A/P2RX7	5
BP	GO:0043588	skin development	11/130	318/18888	0.0345912	5.02583	6.02731	1.2709e-05	0.000168783	9.55703e-05	SHH/EZH2/ASAH1/NAGLU/GBA1/ASH1L/TNF/SMO/EGFR/CASP3/MAP2K1	11
BP	GO:0007189	adenylate cyclase-activating G protein-coupled receptor signaling pathway	8/130	158/18888	0.0506329	7.35657	6.67948	1.37525e-05	0.000181987	0.000103047	NOS1/ADGRG1/ADM/PRKCA/ADORA2A/PDE4A/PDE4B/CRHR1	8
BP	GO:0021587	cerebellum morphogenesis	5/130	45/18888	0.111111	16.1436	8.46681	1.40064e-05	0.000184684	0.000104574	GBA1/SMO/RORA/MAP2K1/ABL1	5
BP	GO:0030431	sleep	4/130	22/18888	0.181818	26.4168	9.93006	1.42358e-05	0.000187041	0.000105908	GRIN2A/PARP1/ADORA1/ADORA2A	4
BP	GO:0008544	epidermis development	12/130	387/18888	0.0310078	4.50519	5.80001	1.51473e-05	0.000197935	0.000112077	SHH/EZH2/ASAH1/NAGLU/FGFR1/GBA1/POU3F2/TNF/SMO/EGFR/CASP3/MAP2K1	12
BP	GO:0071216	cellular response to biotic stimulus	10/130	265/18888	0.0377358	5.48273	6.11787	1.51722e-05	0.000197935	0.000112077	MAPK8/TNF/PRKCA/MAPK14/JAK2/PDE4B/CASP1/TSPO/CDK4/ABL1	10
BP	GO:0009141	nucleoside triphosphate metabolic process	10/130	266/18888	0.037594	5.46212	6.10139	1.56739e-05	0.000203454	0.000115202	OGT/APP/PARP1/HIF1A/VCP/HTR2A/TSPO/P2RX7/GCK/LRRK2	10
BP	GO:0048568	embryonic organ development	13/130	455/18888	0.0285714	4.15121	5.66428	1.57054e-05	0.000203454	0.000115202	SHH/NAGLU/FGFR1/SETD2/KMT2A/ADM/TNF/VEGFA/KIT/SMO/HIF1A/EGFR/MAP2K1	13
BP	GO:0019216	regulation of lipid metabolic process	11/130	326/18888	0.0337423	4.9025	5.91697	1.60157e-05	0.000206748	0.000117067	OGT/ASAH1/ADM/TNF/KIT/PRKCD/RORA/ADORA1/HTR2C/HTR2A/TSPO	11
BP	GO:0051928	positive regulation of calcium ion transport	7/130	117/18888	0.0598291	8.6927	6.94845	1.64623e-05	0.000211773	0.000119913	GRIN1/HTT/F2R/PDGFRB/TSPO/P2RX7/ABL1	7
BP	GO:0032868	response to insulin	10/130	269/18888	0.0371747	5.4012	6.05242	1.72657e-05	0.000221337	0.000125328	OGT/HRAS/YWHAG/ADM/PARP1/PRKCD/CTSK/MAPK14/RAF1/GCK	10
BP	GO:0008202	steroid metabolic process	11/130	329/18888	0.0334347	4.8578	5.87652	1.74355e-05	0.00022204	0.000125726	SHH/ASAH1/FGFR1/GBA1/ADM/TNF/APP/FGF23/KIT/RORA/TSPO	11
BP	GO:0035304	regulation of protein dephosphorylation	6/130	79/18888	0.0759494	11.0349	7.4405	1.74408e-05	0.00022204	0.000125726	HTT/GBA1/TNF/PDGFRB/PRKCD/ADORA1	6
BP	GO:0015833	peptide transport	10/130	271/18888	0.0369004	5.36134	6.02018	1.84026e-05	0.000233479	0.000132203	ABAT/TNF/HIF1A/EGFR/ADORA1/JAK2/HTR2C/RAF1/GCK/CRHR1	10
BP	GO:0001774	microglial cell activation	5/130	48/18888	0.104167	15.1346	8.16252	1.93085e-05	0.000240023	0.000135909	NAGLU/TNF/APP/JAK2/LRRK2	5
BP	GO:0003254	regulation of membrane depolarization	5/130	48/18888	0.104167	15.1346	8.16252	1.93085e-05	0.000240023	0.000135909	PARP1/TSPO/SCN5A/P2RX7/LRRK2	5
BP	GO:0006305	DNA alkylation	5/130	48/18888	0.104167	15.1346	8.16252	1.93085e-05	0.000240023	0.000135909	EZH2/EHMT1/KMT2E/KMT2A/PARP1	5
BP	GO:0006306	DNA methylation	5/130	48/18888	0.104167	15.1346	8.16252	1.93085e-05	0.000240023	0.000135909	EZH2/EHMT1/KMT2E/KMT2A/PARP1	5
BP	GO:0021575	hindbrain morphogenesis	5/130	48/18888	0.104167	15.1346	8.16252	1.93085e-05	0.000240023	0.000135909	GBA1/SMO/RORA/MAP2K1/ABL1	5
BP	GO:0042311	vasodilation	5/130	48/18888	0.104167	15.1346	8.16252	1.93085e-05	0.000240023	0.000135909	NOS1/TNF/EGFR/ADORA1/ADORA2A	5
BP	GO:0006979	response to oxidative stress	12/130	398/18888	0.0301508	4.38067	5.67461	1.99874e-05	0.00024669	0.000139684	EZH2/MAPK8/NAGLU/APP/PARP1/PRKCD/HIF1A/EGFR/CASP3/JAK2/ABL1/LRRK2	12
BP	GO:0071214	cellular response to abiotic stimulus	11/130	334/18888	0.0329341	4.78508	5.81017	2.00453e-05	0.00024669	0.000139684	CERS1/MAPK8/HRAS/PARP1/PRKCD/EGFR/CASP3/MAPK14/CASP1/TSPO/CCND2	11
BP	GO:0104004	cellular response to environmental stimulus	11/130	334/18888	0.0329341	4.78508	5.81017	2.00453e-05	0.00024669	0.000139684	CERS1/MAPK8/HRAS/PARP1/PRKCD/EGFR/CASP3/MAPK14/CASP1/TSPO/CCND2	11
BP	GO:0035162	embryonic hemopoiesis	4/130	24/18888	0.166667	24.2154	9.47381	2.04599e-05	0.000248619	0.000140776	KMT2A/VEGFA/KIT/HIF1A	4
BP	GO:0060252	positive regulation of glial cell proliferation	4/130	24/18888	0.166667	24.2154	9.47381	2.04599e-05	0.000248619	0.000140776	KRAS/TNF/EGFR/TSPO	4
BP	GO:0060571	morphogenesis of an epithelial fold	4/130	24/18888	0.166667	24.2154	9.47381	2.04599e-05	0.000248619	0.000140776	SHH/AR/HIF1A/EGFR	4
BP	GO:0010952	positive regulation of peptidase activity	8/130	167/18888	0.0479042	6.96011	6.44033	2.05461e-05	0.000248619	0.000140776	GRIN2B/TNF/GRIN2A/F2R/CTSK/VCP/JAK2/CASP1	8
BP	GO:0060562	epithelial tube morphogenesis	11/130	335/18888	0.0328358	4.77079	5.79706	2.0606e-05	0.000248619	0.000140776	SHH/KRAS/SETD2/ADM/TNF/VEGFA/SMO/AR/HIF1A/CASP3/ABL1	11
BP	GO:0071496	cellular response to external stimulus	11/130	335/18888	0.0328358	4.77079	5.79706	2.0606e-05	0.000248619	0.000140776	OGT/HNRNPA1/MAPK8/GBA1/YWHAG/FGF23/CTSK/EGFR/CASP1/P2RX7/LRRK2	11
BP	GO:0045862	positive regulation of proteolysis	11/130	336/18888	0.0327381	4.75659	5.784	2.11803e-05	0.000254715	0.000144228	GRIN2B/OGT/GBA1/TNF/GRIN2A/F2R/CTSK/VCP/JAK2/CASP1/LRRK2	11
BP	GO:0014037	Schwann cell differentiation	5/130	49/18888	0.102041	14.8257	8.0671	2.13846e-05	0.000256291	0.00014512	HRAS/POU3F2/NDRG1/MAP2K1/RAF1	5
BP	GO:1903169	regulation of calcium ion transmembrane transport	8/130	168/18888	0.047619	6.91868	6.41485	2.14502e-05	0.000256291	0.00014512	GRIN1/NOS1/HTT/F2R/PDE4B/P2RX7/ABL1/CRHR1	8
BP	GO:0007405	neuroblast proliferation	6/130	82/18888	0.0731707	10.6311	7.27606	2.16042e-05	0.000257299	0.000145691	SHH/FGFR1/VEGFA/SMO/HIF1A/LRRK2	6
BP	GO:0046034	ATP metabolic process	9/130	220/18888	0.0409091	5.94378	6.14018	2.17988e-05	0.000258782	0.000146531	OGT/APP/PARP1/HIF1A/VCP/HTR2A/TSPO/P2RX7/GCK	9
BP	GO:0045834	positive regulation of lipid metabolic process	7/130	123/18888	0.0569106	8.26867	6.73276	2.27856e-05	0.00026963	0.000152673	OGT/ADM/TNF/PRKCD/ADORA1/HTR2C/HTR2A	7
BP	GO:0001570	vasculogenesis	6/130	83/18888	0.0722892	10.5031	7.22313	2.31573e-05	0.000273152	0.000154667	SHH/SETD2/ADM/VEGFA/PDGFRB/SMO	6
BP	GO:0016042	lipid catabolic process	11/130	340/18888	0.0323529	4.70063	5.73227	2.36183e-05	0.000277704	0.000157244	ASAH1/NEU1/NAGLU/GBA1/NAGA/HEXA/HEXB/TNF/FGF23/PRKCD/ADORA1	11
BP	GO:0006821	chloride transport	7/130	124/18888	0.0564516	8.20199	6.69823	2.4012e-05	0.000281436	0.000159358	GABRB3/GABRA3/GABRG2/GABRA1/GABRA5/GABRA2/TSPO	7
BP	GO:0006820	monoatomic anion transport	8/130	171/18888	0.0467836	6.7973	6.33966	2.4365e-05	0.000283772	0.00016068	GABRB3/GABRA3/GABRG2/GABRA1/GABRA5/GABRA2/GRM5/TSPO	8
BP	GO:0051897	positive regulation of phosphatidylinositol 3-kinase/protein kinase B signal transduction	8/130	171/18888	0.0467836	6.7973	6.33966	2.4365e-05	0.000283772	0.00016068	FGFR1/TNF/F2R/FLT1/PDGFRB/KIT/EGFR/JAK2	8
BP	GO:0016236	macroautophagy	11/130	343/18888	0.03207	4.65952	5.694	2.5603e-05	0.000297252	0.000168313	OGT/CERS1/HTT/MAPK8/GBA1/CTSK/HIF1A/CASP3/VCP/TSPO/LRRK2	11
BP	GO:0002269	leukocyte activation involved in inflammatory response	5/130	51/18888	0.0980392	14.2443	7.88442	2.6055e-05	0.000301552	0.000170748	NAGLU/TNF/APP/JAK2/LRRK2	5
BP	GO:0016241	regulation of macroautophagy	8/130	173/18888	0.0462428	6.71872	6.29052	2.64872e-05	0.000305596	0.000173038	CERS1/HTT/MAPK8/GBA1/HIF1A/CASP3/TSPO/LRRK2	8
BP	GO:0033135	regulation of peptidyl-serine phosphorylation	7/130	126/18888	0.0555556	8.07179	6.63033	2.66284e-05	0.000306268	0.000173418	NOS1/NSD1/TNF/APP/VEGFA/EGFR/RAF1	7
BP	GO:0021987	cerebral cortex development	7/130	127/18888	0.0551181	8.00824	6.59694	2.8022e-05	0.000320301	0.000181365	ATIC/ADGRG1/POU3F2/CDH2/SMO/HIF1A/EGFR	7
BP	GO:2001056	positive regulation of cysteine-type endopeptidase activity	7/130	127/18888	0.0551181	8.00824	6.59694	2.8022e-05	0.000320301	0.000181365	GRIN2B/TNF/GRIN2A/F2R/VCP/JAK2/CASP1	7
BP	GO:1903008	organelle disassembly	8/130	175/18888	0.0457143	6.64193	6.24216	2.87622e-05	0.000327747	0.00018558	OGT/CERS1/HTT/GBA1/CTSK/HIF1A/VCP/TSPO	8
BP	GO:0009791	post-embryonic development	6/130	87/18888	0.0689655	10.0202	7.0201	3.02943e-05	0.000343087	0.000194267	KMT2A/ASH1L/VEGFA/GABRG2/JAK2/ABL1	6
BP	GO:0015844	monoamine transport	6/130	87/18888	0.0689655	10.0202	7.0201	3.02943e-05	0.000343087	0.000194267	NOS1/ABAT/ACTB/ADORA2A/OXTR/HTR2A	6
BP	GO:0032612	interleukin-1 production	7/130	129/18888	0.0542636	7.88408	6.53124	3.09898e-05	0.000347764	0.000196915	TNF/APP/RAD21/F2R/JAK2/CASP1/P2RX7	7
BP	GO:0032652	regulation of interleukin-1 production	7/130	129/18888	0.0542636	7.88408	6.53124	3.09898e-05	0.000347764	0.000196915	TNF/APP/RAD21/F2R/JAK2/CASP1/P2RX7	7
BP	GO:0051209	release of sequestered calcium ion into cytosol	7/130	129/18888	0.0542636	7.88408	6.53124	3.09898e-05	0.000347764	0.000196915	NOS1/HTT/F2R/HTR2C/HTR2A/P2RX7/ABL1	7
BP	GO:0002262	myeloid cell homeostasis	8/130	177/18888	0.0451977	6.56688	6.19456	3.11986e-05	0.000349046	0.000197641	KMT2E/VEGFA/KIT/HIF1A/CASP3/MAPK14/JAK2/PDE4B	8
BP	GO:1902692	regulation of neuroblast proliferation	5/130	53/18888	0.0943396	13.7068	7.71173	3.14814e-05	0.000351145	0.00019883	SHH/VEGFA/SMO/HIF1A/LRRK2	5
BP	GO:0046889	positive regulation of lipid biosynthetic process	6/130	88/18888	0.0681818	9.90629	6.97139	3.23291e-05	0.000359515	0.000203569	OGT/ADM/TNF/PRKCD/HTR2C/HTR2A	6
BP	GO:0051283	negative regulation of sequestering of calcium ion	7/130	130/18888	0.0538462	7.82343	6.49892	3.25679e-05	0.000361083	0.000204457	NOS1/HTT/F2R/HTR2C/HTR2A/P2RX7/ABL1	7
BP	GO:1902894	negative regulation of miRNA transcription	4/130	27/18888	0.148148	21.5248	8.8846	3.32555e-05	0.000367603	0.000208148	NCOR2/TNF/VEGFA/HIF1A	4
BP	GO:0042310	vasoconstriction	6/130	89/18888	0.0674157	9.79499	6.92345	3.44722e-05	0.000375772	0.000212774	ADM/F2R/EGFR/OXTR/HTR2A/ABL1	6
BP	GO:2000027	regulation of animal organ morphogenesis	6/130	89/18888	0.0674157	9.79499	6.92345	3.44722e-05	0.000375772	0.000212774	SHH/FGFR1/TNF/VEGFA/SMO/AR	6
BP	GO:0031279	regulation of cyclase activity	5/130	54/18888	0.0925926	13.453	7.62885	3.45034e-05	0.000375772	0.000212774	NOS1/MAPK8/MAPK14/RAF1/CRHR1	5
BP	GO:0038093	Fc receptor signaling pathway	5/130	54/18888	0.0925926	13.453	7.62885	3.45034e-05	0.000375772	0.000212774	MAPK8/MAPK10/KIT/PRKCD/ABL1	5
BP	GO:1904645	response to amyloid-beta	5/130	54/18888	0.0925926	13.453	7.62885	3.45034e-05	0.000375772	0.000212774	CACNA1B/TNF/APP/PARP1/GRM5	5
BP	GO:0051282	regulation of sequestering of calcium ion	7/130	132/18888	0.0530303	7.7049	6.4353	3.59227e-05	0.000390079	0.000220875	NOS1/HTT/F2R/HTR2C/HTR2A/P2RX7/ABL1	7
BP	GO:0006096	glycolytic process	6/130	90/18888	0.0666667	9.68615	6.87627	3.6728e-05	0.000397653	0.000225164	OGT/APP/HIF1A/HTR2A/P2RX7/GCK	6
BP	GO:0034351	negative regulation of glial cell apoptotic process	3/130	10/18888	0.3	43.5877	11.2141	3.69043e-05	0.000398394	0.000225583	RAD21/PRKCD/PRKCA	3
BP	GO:0048565	digestive tract development	7/130	133/18888	0.0526316	7.64696	6.40399	3.77037e-05	0.000403933	0.000228719	SHH/TNF/KIT/SMO/HIF1A/EGFR/OXTR	7
BP	GO:0030857	negative regulation of epithelial cell differentiation	5/130	55/18888	0.0909091	13.2084	7.54814	3.77456e-05	0.000403933	0.000228719	EZH2/KRAS/VEGFA/SMO/CCND1	5
BP	GO:1900087	positive regulation of G1/S transition of mitotic cell cycle	5/130	55/18888	0.0909091	13.2084	7.54814	3.77456e-05	0.000403933	0.000228719	KMT2E/EGFR/CCND1/CCND2/TERT	5
BP	GO:0001964	startle response	4/130	28/18888	0.142857	20.756	8.709	3.85919e-05	0.000409429	0.000231831	GRIN3A/GRIN2D/GRIN2A/ADORA2A	4
BP	GO:0032770	positive regulation of monooxygenase activity	4/130	28/18888	0.142857	20.756	8.709	3.85919e-05	0.000409429	0.000231831	TNF/FGF23/HIF1A/TERT	4
BP	GO:2000629	negative regulation of miRNA metabolic process	4/130	28/18888	0.142857	20.756	8.709	3.85919e-05	0.000409429	0.000231831	NCOR2/TNF/VEGFA/HIF1A	4
BP	GO:0007565	female pregnancy	8/130	183/18888	0.0437158	6.35158	6.05603	3.95682e-05	0.000418584	0.000237015	ASH1L/ADM/VEGFA/PARP1/AR/OXTR/CRHR1/CTSB	8
BP	GO:0031346	positive regulation of cell projection organization	11/130	360/18888	0.0305556	4.43949	5.48518	3.98049e-05	0.000419884	0.000237752	L1CAM/EZH2/HTT/HRAS/FGFR1/AGRN/VEGFA/KIT/MAP2K1/P2RX7/ABL1	11
BP	GO:0030218	erythrocyte differentiation	7/130	135/18888	0.0518519	7.53368	6.34233	4.14835e-05	0.000436272	0.000247031	KMT2E/VEGFA/KIT/HIF1A/CASP3/MAPK14/JAK2	7
BP	GO:0046032	ADP catabolic process	6/130	92/18888	0.0652174	9.47559	6.78408	4.15947e-05	0.000436272	0.000247031	OGT/APP/HIF1A/HTR2A/P2RX7/GCK	6
BP	GO:0002573	myeloid leukocyte differentiation	9/130	239/18888	0.0376569	5.47126	5.7911	4.17307e-05	0.000436458	0.000247136	NAGLU/GBA1/TNF/APP/VEGFA/PARP1/KIT/PRKCA/MAPK14	9
BP	GO:0051208	sequestering of calcium ion	7/130	136/18888	0.0514706	7.47828	6.31198	4.34869e-05	0.000453541	0.000256809	NOS1/HTT/F2R/HTR2C/HTR2A/P2RX7/ABL1	7
BP	GO:0033138	positive regulation of peptidyl-serine phosphorylation	6/130	93/18888	0.0645161	9.3737	6.73903	4.42147e-05	0.000459833	0.000260372	NOS1/TNF/APP/VEGFA/EGFR/RAF1	6
BP	GO:0030072	peptide hormone secretion	9/130	242/18888	0.0371901	5.40343	5.7394	4.59767e-05	0.00047573	0.000269373	ABAT/TNF/HIF1A/EGFR/JAK2/HTR2C/RAF1/GCK/CRHR1	9
BP	GO:0008217	regulation of blood pressure	8/130	187/18888	0.0427807	6.21571	5.96708	4.61298e-05	0.00047573	0.000269373	NOS1/ABAT/ADM/TNF/F2R/AR/ADORA1/OXTR	8
BP	GO:0046890	regulation of lipid biosynthetic process	8/130	187/18888	0.0427807	6.21571	5.96708	4.61298e-05	0.00047573	0.000269373	OGT/ASAH1/ADM/TNF/PRKCD/HTR2C/HTR2A/TSPO	8
BP	GO:0019364	pyridine nucleotide catabolic process	6/130	94/18888	0.0638298	9.27398	6.69466	4.69653e-05	0.000481656	0.000272729	OGT/APP/HIF1A/HTR2A/P2RX7/GCK	6
BP	GO:0050848	regulation of calcium-mediated signaling	6/130	94/18888	0.0638298	9.27398	6.69466	4.69653e-05	0.000481656	0.000272729	HTT/TNF/APP/PDGFRB/HTR2C/LRRK2	6
BP	GO:0052547	regulation of peptidase activity	10/130	304/18888	0.0328947	4.77935	5.53025	4.88693e-05	0.000498767	0.000282418	GRIN2B/TNF/VEGFA/GRIN2A/F2R/CTSK/VCP/JAK2/CASP1/RAF1	10
BP	GO:0042306	regulation of protein import into nucleus	5/130	58/18888	0.0862069	12.5252	7.31808	4.8904e-05	0.000498767	0.000282418	SHH/SMO/PRKCD/MAPK14/JAK2	5
BP	GO:0009137	purine nucleoside diphosphate catabolic process	6/130	95/18888	0.0631579	9.17636	6.65095	4.98513e-05	0.000504249	0.000285522	OGT/APP/HIF1A/HTR2A/P2RX7/GCK	6
BP	GO:0009181	purine ribonucleoside diphosphate catabolic process	6/130	95/18888	0.0631579	9.17636	6.65095	4.98513e-05	0.000504249	0.000285522	OGT/APP/HIF1A/HTR2A/P2RX7/GCK	6
BP	GO:0043279	response to alkaloid	6/130	95/18888	0.0631579	9.17636	6.65095	4.98513e-05	0.000504249	0.000285522	ABAT/SETD2/CASP3/ADORA2A/OXTR/HTR2A	6
BP	GO:0033148	positive regulation of intracellular estrogen receptor signaling pathway	3/130	11/18888	0.272727	39.6252	10.6674	5.0488e-05	0.000504503	0.000285666	KMT2D/PARP1/AR	3
BP	GO:0034350	regulation of glial cell apoptotic process	3/130	11/18888	0.272727	39.6252	10.6674	5.0488e-05	0.000504503	0.000285666	RAD21/PRKCD/PRKCA	3
BP	GO:0060020	Bergmann glial cell differentiation	3/130	11/18888	0.272727	39.6252	10.6674	5.0488e-05	0.000504503	0.000285666	SHH/MAP2K1/ABL1	3
BP	GO:1904181	positive regulation of membrane depolarization	3/130	11/18888	0.272727	39.6252	10.6674	5.0488e-05	0.000504503	0.000285666	PARP1/TSPO/P2RX7	3
BP	GO:0016485	protein processing	9/130	245/18888	0.0367347	5.33727	5.68855	5.05825e-05	0.000504503	0.000285666	OGT/SHH/NAGLU/GRIN2A/PARP1/CASP3/CASP1/P2RX7/LRRK2	9
BP	GO:0009306	protein secretion	11/130	370/18888	0.0297297	4.3195	5.3683	5.09895e-05	0.000504503	0.000285666	PORCN/ABAT/TNF/F2R/HIF1A/EGFR/ADORA2A/JAK2/P2RX7/RAF1/GCK	11
BP	GO:0045987	positive regulation of smooth muscle contraction	4/130	30/18888	0.133333	19.3723	8.38371	5.11062e-05	0.000504503	0.000285666	ABAT/F2R/KIT/OXTR	4
BP	GO:0097421	liver regeneration	4/130	30/18888	0.133333	19.3723	8.38371	5.11062e-05	0.000504503	0.000285666	EZH2/TNF/EGFR/CCND1	4
BP	GO:0099505	regulation of presynaptic membrane potential	4/130	30/18888	0.133333	19.3723	8.38371	5.11062e-05	0.000504503	0.000285666	GRIN2B/GRIN2D/GABRA5/GABRA2	4
BP	GO:0035592	establishment of protein localization to extracellular region	11/130	371/18888	0.0296496	4.30786	5.35684	5.22438e-05	0.000514358	0.000291246	PORCN/ABAT/TNF/F2R/HIF1A/EGFR/ADORA2A/JAK2/P2RX7/RAF1/GCK	11
BP	GO:0003073	regulation of systemic arterial blood pressure	6/130	96/18888	0.0625	9.08077	6.60787	5.28775e-05	0.000519212	0.000293994	ADM/TNF/F2R/AR/ADORA1/OXTR	6
BP	GO:0034599	cellular response to oxidative stress	9/130	248/18888	0.0362903	5.2727	5.63853	5.5572e-05	0.000544223	0.000308156	EZH2/MAPK8/NAGLU/PARP1/PRKCD/HIF1A/EGFR/ABL1/LRRK2	9
BP	GO:0072526	pyridine-containing compound catabolic process	6/130	97/18888	0.0618557	8.98715	6.56542	5.60489e-05	0.00054744	0.000309978	OGT/APP/HIF1A/HTR2A/P2RX7/GCK	6
BP	GO:0071168	protein localization to chromatin	5/130	60/18888	0.0833333	12.1077	7.17393	5.76524e-05	0.000560138	0.000317168	EZH2/SETD2/PARP1/RAD21/VCP	5
BP	GO:0097300	programmed necrotic cell death	5/130	60/18888	0.0833333	12.1077	7.17393	5.76524e-05	0.000560138	0.000317168	OGT/ASAH1/TNF/PARP1/TSPO	5
BP	GO:0071375	cellular response to peptide hormone stimulus	10/130	311/18888	0.0321543	4.67178	5.43537	5.91295e-05	0.000572314	0.000324062	OGT/HRAS/YWHAG/PARP1/PRKCD/PRKCA/JAK2/RAF1/GCK/CRHR1	10
BP	GO:0009191	ribonucleoside diphosphate catabolic process	6/130	98/18888	0.0612245	8.89545	6.52358	5.93706e-05	0.000572314	0.000324062	OGT/APP/HIF1A/HTR2A/P2RX7/GCK	6
BP	GO:0046031	ADP metabolic process	6/130	98/18888	0.0612245	8.89545	6.52358	5.93706e-05	0.000572314	0.000324062	OGT/APP/HIF1A/HTR2A/P2RX7/GCK	6
BP	GO:0071466	cellular response to xenobiotic stimulus	8/130	194/18888	0.0412371	5.99144	5.81748	5.97949e-05	0.000574903	0.000325528	GRIN1/NOS1/CERS1/NAT2/EGFR/RORA/PDE4A/PDE4B	8
BP	GO:0051047	positive regulation of secretion	10/130	312/18888	0.0320513	4.6568	5.42204	6.07352e-05	0.000582427	0.000329789	ABAT/FGFR1/HIF1A/EGFR/ADORA1/ADORA2A/JAK2/OXTR/P2RX7/GCK	10
BP	GO:0034101	erythrocyte homeostasis	7/130	144/18888	0.0486111	7.06282	6.07974	6.25523e-05	0.000596752	0.0003379	KMT2E/VEGFA/KIT/HIF1A/CASP3/MAPK14/JAK2	7
BP	GO:1900180	regulation of protein localization to nucleus	7/130	144/18888	0.0486111	7.06282	6.07974	6.25523e-05	0.000596752	0.0003379	SHH/PARP1/SMO/PRKCD/MAPK14/JAK2/TERT	7
BP	GO:0071692	protein localization to extracellular region	11/130	379/18888	0.0290237	4.21693	5.26659	6.32703e-05	0.000602047	0.000340898	PORCN/ABAT/TNF/F2R/HIF1A/EGFR/ADORA2A/JAK2/P2RX7/RAF1/GCK	11
BP	GO:0055123	digestive system development	7/130	145/18888	0.0482759	7.01411	6.05196	6.53533e-05	0.000620268	0.000351215	SHH/TNF/KIT/SMO/HIF1A/EGFR/OXTR	7
BP	GO:1903580	positive regulation of ATP metabolic process	4/130	32/18888	0.125	18.1615	8.08847	6.63495e-05	0.000624594	0.000353665	APP/VCP/HTR2A/P2RX7	4
BP	GO:2000463	positive regulation of excitatory postsynaptic potential	4/130	32/18888	0.125	18.1615	8.08847	6.63495e-05	0.000624594	0.000353665	GRIN2B/GRIN1/GRIN2D/GRIN2A	4
BP	GO:0006304	DNA modification	6/130	100/18888	0.06	8.71754	6.44167	6.64857e-05	0.000624594	0.000353665	EZH2/EHMT1/KMT2E/KMT2A/FTO/PARP1	6
BP	GO:0048661	positive regulation of smooth muscle cell proliferation	6/130	100/18888	0.06	8.71754	6.44167	6.64857e-05	0.000624594	0.000353665	TNF/PDGFRB/ELANE/EGFR/JAK2/TERT	6
BP	GO:0033145	positive regulation of intracellular steroid hormone receptor signaling pathway	3/130	12/18888	0.25	36.3231	10.1895	6.69787e-05	0.000627627	0.000355382	KMT2D/PARP1/AR	3
BP	GO:0032731	positive regulation of interleukin-1 beta production	5/130	62/18888	0.0806452	11.7171	7.03647	6.75621e-05	0.000629897	0.000356667	TNF/APP/JAK2/CASP1/P2RX7	5
BP	GO:0046824	positive regulation of nucleocytoplasmic transport	5/130	62/18888	0.0806452	11.7171	7.03647	6.75621e-05	0.000629897	0.000356667	SHH/SMO/PRKCD/MAPK14/JAK2	5
BP	GO:0098656	monoatomic anion transmembrane transport	7/130	146/18888	0.0479452	6.96607	6.02444	6.8256e-05	0.000634763	0.000359423	GABRB3/GABRA3/GABRG2/GABRA1/GABRA5/GABRA2/GRM5	7
BP	GO:0120162	positive regulation of cold-induced thermogenesis	6/130	101/18888	0.0594059	8.63123	6.40157	7.02899e-05	0.000652036	0.000369203	PRDM16/OGT/EHMT1/VEGFA/JAK2/OXTR	6
BP	GO:0050714	positive regulation of protein secretion	7/130	147/18888	0.047619	6.91868	5.99718	7.12632e-05	0.000659408	0.000373377	ABAT/HIF1A/EGFR/ADORA2A/JAK2/P2RX7/GCK	7
BP	GO:0002791	regulation of peptide secretion	8/130	200/18888	0.04	5.81169	5.69497	7.40462e-05	0.000683446	0.000386989	ABAT/TNF/HIF1A/EGFR/ADORA1/JAK2/HTR2C/GCK	8
BP	GO:0009134	nucleoside diphosphate catabolic process	6/130	102/18888	0.0588235	8.54661	6.36201	7.42658e-05	0.000683764	0.000387168	OGT/APP/HIF1A/HTR2A/P2RX7/GCK	6
BP	GO:1901524	regulation of mitophagy	4/130	33/18888	0.121212	17.6112	7.95068	7.51002e-05	0.000689726	0.000390545	CERS1/HTT/HIF1A/TSPO	4
BP	GO:0050728	negative regulation of inflammatory response	8/130	201/18888	0.039801	5.78278	5.67503	7.66753e-05	0.000702445	0.000397746	GBA1/ASH1L/ELANE/PRKCD/RORA/ADORA1/ADORA2A/MAPK14	8
BP	GO:0008277	regulation of G protein-coupled receptor signaling pathway	7/130	149/18888	0.0469799	6.82581	5.94342	7.76027e-05	0.00070743	0.000400569	NOS1/ADM/GRM5/HIF1A/PRKCA/PDE4A/PDE4B	7
BP	GO:0035148	tube formation	7/130	149/18888	0.0469799	6.82581	5.94342	7.76027e-05	0.00070743	0.000400569	SHH/SETD2/ADM/VEGFA/HIF1A/CASP3/ABL1	7
BP	GO:0040014	regulation of multicellular organism growth	5/130	64/18888	0.078125	11.351	6.90517	7.87357e-05	0.000714231	0.00040442	GAMT/POU3F2/FTO/APP/SMO	5
BP	GO:2000179	positive regulation of neural precursor cell proliferation	5/130	64/18888	0.078125	11.351	6.90517	7.87357e-05	0.000714231	0.00040442	SHH/ADGRG1/VEGFA/SMO/HIF1A	5
BP	GO:0090087	regulation of peptide transport	8/130	202/18888	0.039604	5.75415	5.65523	7.93815e-05	0.000718325	0.000406738	ABAT/TNF/HIF1A/EGFR/ADORA1/JAK2/HTR2C/GCK	8
BP	GO:0016331	morphogenesis of embryonic epithelium	7/130	150/18888	0.0466667	6.78031	5.91691	8.09409e-05	0.000730645	0.000413714	SHH/SETD2/ADM/AR/HIF1A/CASP3/ABL1	7
BP	GO:0000302	response to reactive oxygen species	8/130	203/18888	0.0394089	5.72581	5.63556	8.21666e-05	0.0007399	0.000418955	EZH2/MAPK8/PRKCD/HIF1A/EGFR/CASP3/ABL1/LRRK2	8
BP	GO:0010469	regulation of signaling receptor activity	6/130	104/18888	0.0576923	8.38225	6.28451	8.27553e-05	0.000741584	0.000419908	TNF/APP/PRKCD/HIF1A/SLC6A9/JAK2	6
BP	GO:0019218	regulation of steroid metabolic process	6/130	104/18888	0.0576923	8.38225	6.28451	8.27553e-05	0.000741584	0.000419908	ASAH1/ADM/TNF/KIT/RORA/TSPO	6
BP	GO:0051051	negative regulation of transport	12/130	462/18888	0.025974	3.77383	5.0251	8.44646e-05	0.000755002	0.000427506	NOS1/SHH/ABAT/TNF/FGF23/F2R/SLC6A9/ADORA1/HTR2A/TSPO/LRRK2/CRHR1	12
BP	GO:0007435	salivary gland morphogenesis	4/130	34/18888	0.117647	17.0932	7.8188	8.46617e-05	0.000755002	0.000427506	SHH/FGFR1/TNF/EGFR	4
BP	GO:0044703	multi-organism reproductive process	8/130	204/18888	0.0392157	5.69774	5.61602	8.50323e-05	0.00075648	0.000428343	ASH1L/ADM/VEGFA/PARP1/AR/OXTR/CRHR1/CTSB	8
BP	GO:0014004	microglia differentiation	3/130	13/18888	0.230769	33.529	9.76694	8.66343e-05	0.000763374	0.000432246	NAGLU/GBA1/APP	3
BP	GO:0045737	positive regulation of cyclin-dependent protein serine/threonine kinase activity	3/130	13/18888	0.230769	33.529	9.76694	8.66343e-05	0.000763374	0.000432246	EGFR/CCND1/CCND2	3
BP	GO:0071679	commissural neuron axon guidance	3/130	13/18888	0.230769	33.529	9.76694	8.66343e-05	0.000763374	0.000432246	NCAM1/VEGFA/SMO	3
BP	GO:1901526	positive regulation of mitophagy	3/130	13/18888	0.230769	33.529	9.76694	8.66343e-05	0.000763374	0.000432246	CERS1/HTT/HIF1A	3
BP	GO:0034612	response to tumor necrosis factor	9/130	263/18888	0.0342205	4.97198	5.40004	8.72086e-05	0.000766605	0.000434076	ASAH1/GBA1/TNF/CTSK/CASP3/RORA/MAPK14/JAK2/CASP1	9
BP	GO:0015800	acidic amino acid transport	5/130	66/18888	0.0757576	11.007	6.77958	9.12804e-05	0.000797339	0.000451479	ABAT/TNF/ADORA1/ADORA2A/P2RX7	5
BP	GO:0006935	chemotaxis	12/130	466/18888	0.0257511	3.74143	4.98841	9.16347e-05	0.000797339	0.000451479	L1CAM/HRAS/FGFR1/VEGFA/FLT1/PDGFRB/KIT/ELANE/PRKCD/MAPK14/MAP2K1/PDE4B	12
BP	GO:0010950	positive regulation of endopeptidase activity	7/130	153/18888	0.0457516	6.64736	5.83881	9.16652e-05	0.000797339	0.000451479	GRIN2B/TNF/GRIN2A/F2R/VCP/JAK2/CASP1	7
BP	GO:0018210	peptidyl-threonine modification	6/130	106/18888	0.0566038	8.22409	6.20905	9.20007e-05	0.000797339	0.000451479	MAPK8/GALNT2/APP/PRKCD/PRKCA/LRRK2	6
BP	GO:0030148	sphingolipid biosynthetic process	6/130	106/18888	0.0566038	8.22409	6.20905	9.20007e-05	0.000797339	0.000451479	CERS1/ASAH1/ST3GAL3/GBA1/PRKCD/P2RX7	6
BP	GO:0035303	regulation of dephosphorylation	6/130	106/18888	0.0566038	8.22409	6.20905	9.20007e-05	0.000797339	0.000451479	HTT/GBA1/TNF/PDGFRB/PRKCD/ADORA1	6
BP	GO:0050900	leukocyte migration	11/130	396/18888	0.0277778	4.0359	5.0828	9.34938e-05	0.000808382	0.000457731	GBA1/B4GALT1/TNF/APP/VEGFA/FLT1/KIT/ELANE/ADORA1/PDE4B/ABL1	11
BP	GO:0032228	regulation of synaptic transmission, GABAergic	4/130	35/18888	0.114286	16.6048	7.69242	9.50783e-05	0.000820162	0.000464401	KRAS/ADORA1/ADORA2A/OXTR	4
BP	GO:0042330	taxis	12/130	468/18888	0.025641	3.72544	4.97022	9.54124e-05	0.000821125	0.000464947	L1CAM/HRAS/FGFR1/VEGFA/FLT1/PDGFRB/KIT/ELANE/PRKCD/MAPK14/MAP2K1/PDE4B	12
BP	GO:0032963	collagen metabolic process	6/130	107/18888	0.0560748	8.14723	6.17206	9.69218e-05	0.000832175	0.000471204	NAGLU/F2R/CTSK/HIF1A/P2RX7/CTSB	6
BP	GO:0061180	mammary gland epithelium development	5/130	67/18888	0.0746269	10.8427	6.71878	9.81015e-05	0.00084035	0.000475832	SMO/AR/HIF1A/JAK2/CCND1	5
BP	GO:0001776	leukocyte homeostasis	6/130	108/18888	0.0555556	8.07179	6.13555	0.00010205	0.00087215	0.000493839	F2R/HIF1A/CASP3/PDE4B/P2RX7/ABL1	6
BP	GO:0031960	response to corticosteroid	7/130	156/18888	0.0448718	6.51953	5.76278	0.00010352	0.00087873	0.000497565	GBA1/ADM/TNF/PARP1/EGFR/CASP3/JAK2	7
BP	GO:0031668	cellular response to extracellular stimulus	9/130	269/18888	0.0334572	4.86108	5.30966	0.000103534	0.00087873	0.000497565	OGT/HNRNPA1/MAPK8/GBA1/YWHAG/FGF23/CTSK/P2RX7/LRRK2	9
BP	GO:0050708	regulation of protein secretion	9/130	269/18888	0.0334572	4.86108	5.30966	0.000103534	0.00087873	0.000497565	ABAT/TNF/F2R/HIF1A/EGFR/ADORA2A/JAK2/P2RX7/GCK	9
BP	GO:0007617	mating behavior	4/130	36/18888	0.111111	16.1436	7.57114	0.000106395	0.000898883	0.000508976	ABAT/HEXB/APP/OXTR	4
BP	GO:1905332	positive regulation of morphogenesis of an epithelium	4/130	36/18888	0.111111	16.1436	7.57114	0.000106395	0.000898883	0.000508976	VEGFA/SMO/AR/ABL1	4
BP	GO:1902476	chloride transmembrane transport	6/130	109/18888	0.0550459	7.99774	6.09951	0.000107392	0.000905229	0.000512569	GABRB3/GABRA3/GABRG2/GABRA1/GABRA5/GABRA2	6
BP	GO:0048754	branching morphogenesis of an epithelial tube	7/130	157/18888	0.044586	6.478	5.73788	0.000107739	0.000906084	0.000513053	SHH/KRAS/TNF/VEGFA/SMO/AR/ABL1	7
BP	GO:0009214	cyclic nucleotide catabolic process	3/130	14/18888	0.214286	31.1341	9.38966	0.000109707	0.00091431	0.000517711	PDE10A/PDE4A/PDE4B	3
BP	GO:0070141	response to UV-A	3/130	14/18888	0.214286	31.1341	9.38966	0.000109707	0.00091431	0.000517711	CERS1/EGFR/CCND1	3
BP	GO:1900272	negative regulation of long-term synaptic potentiation	3/130	14/18888	0.214286	31.1341	9.38966	0.000109707	0.00091431	0.000517711	APP/ADORA1/ABL1	3
BP	GO:1903727	positive regulation of phospholipid metabolic process	3/130	14/18888	0.214286	31.1341	9.38966	0.000109707	0.00091431	0.000517711	PRKCD/HTR2C/HTR2A	3
BP	GO:0021915	neural tube development	7/130	158/18888	0.0443038	6.437	5.71319	0.000112096	0.000930856	0.00052708	SHH/SETD2/ADM/SMO/HIF1A/CASP3/ABL1	7
BP	GO:0009135	purine nucleoside diphosphate metabolic process	6/130	110/18888	0.0545455	7.92503	6.06392	0.000112953	0.000930856	0.00052708	OGT/APP/HIF1A/HTR2A/P2RX7/GCK	6
BP	GO:0009179	purine ribonucleoside diphosphate metabolic process	6/130	110/18888	0.0545455	7.92503	6.06392	0.000112953	0.000930856	0.00052708	OGT/APP/HIF1A/HTR2A/P2RX7/GCK	6
BP	GO:0042116	macrophage activation	6/130	110/18888	0.0545455	7.92503	6.06392	0.000112953	0.000930856	0.00052708	NAGLU/TNF/APP/RORA/JAK2/LRRK2	6
BP	GO:0051100	negative regulation of binding	6/130	110/18888	0.0545455	7.92503	6.06392	0.000112953	0.000930856	0.00052708	MAPK8/ACTB/SMO/PRKCD/JAK2/LRRK2	6
BP	GO:0034764	positive regulation of transmembrane transport	8/130	213/18888	0.0375587	5.45699	5.44579	0.000114761	0.000943648	0.000534323	GRIN1/NOS1/HTT/F2R/MAPK14/P2RX7/TERT/ABL1	8
BP	GO:0002052	positive regulation of neuroblast proliferation	4/130	37/18888	0.108108	15.7073	7.45463	0.000118659	0.000965622	0.000546766	SHH/VEGFA/SMO/HIF1A	4
BP	GO:0007431	salivary gland development	4/130	37/18888	0.108108	15.7073	7.45463	0.000118659	0.000965622	0.000546766	SHH/FGFR1/TNF/EGFR	4
BP	GO:0021696	cerebellar cortex morphogenesis	4/130	37/18888	0.108108	15.7073	7.45463	0.000118659	0.000965622	0.000546766	GBA1/SMO/RORA/MAP2K1	4
BP	GO:0007040	lysosome organization	6/130	111/18888	0.0540541	7.85364	6.02878	0.000118741	0.000965622	0.000546766	NAGLU/GBA1/HEXA/HEXB/P2RX7/LRRK2	6
BP	GO:0080171	lytic vacuole organization	6/130	111/18888	0.0540541	7.85364	6.02878	0.000118741	0.000965622	0.000546766	NAGLU/GBA1/HEXA/HEXB/P2RX7/LRRK2	6
BP	GO:0043281	regulation of cysteine-type endopeptidase activity involved in apoptotic process	7/130	160/18888	0.04375	6.35654	5.66446	0.00012124	0.000983773	0.000557043	TNF/VEGFA/F2R/VCP/JAK2/CASP1/RAF1	7
BP	GO:0014013	regulation of gliogenesis	6/130	112/18888	0.0535714	7.78352	5.99408	0.000124762	0.00100792	0.000570719	SHH/EZH2/KRAS/TNF/EGFR/TSPO	6
BP	GO:0046822	regulation of nucleocytoplasmic transport	6/130	112/18888	0.0535714	7.78352	5.99408	0.000124762	0.00100792	0.000570719	SHH/SETD2/SMO/PRKCD/MAPK14/JAK2	6
BP	GO:0007605	sensory perception of sound	7/130	161/18888	0.0434783	6.31706	5.6404	0.000126034	0.00101598	0.000575278	POMGNT1/FGFR1/FBXO11/HEXA/HEXB/KIT/CASP3	7
BP	GO:1901654	response to ketone	8/130	217/18888	0.0368664	5.3564	5.37321	0.00013049	0.0010496	0.000594318	GBA1/PARP1/AR/EGFR/JAK2/OXTR/TSPO/CDK4	8
BP	GO:0002793	positive regulation of peptide secretion	6/130	113/18888	0.0530973	7.71464	5.9598	0.000131023	0.0010516	0.000595449	ABAT/HIF1A/EGFR/ADORA1/JAK2/GCK	6
BP	GO:0045187	regulation of circadian sleep/wake cycle, sleep	3/130	15/18888	0.2	29.0585	9.05001	0.000136445	0.00109274	0.000618745	PARP1/ADORA1/ADORA2A	3
BP	GO:0052548	regulation of endopeptidase activity	9/130	280/18888	0.0321429	4.67011	5.15072	0.000140144	0.00111994	0.000634143	GRIN2B/TNF/VEGFA/GRIN2A/F2R/VCP/JAK2/CASP1/RAF1	9
BP	GO:0019362	pyridine nucleotide metabolic process	7/130	164/18888	0.0426829	6.2015	5.56944	0.000141348	0.00112228	0.000635468	OGT/APP/HIF1A/VCP/HTR2A/P2RX7/GCK	7
BP	GO:0046496	nicotinamide nucleotide metabolic process	7/130	164/18888	0.0426829	6.2015	5.56944	0.000141348	0.00112228	0.000635468	OGT/APP/HIF1A/VCP/HTR2A/P2RX7/GCK	7
BP	GO:0050731	positive regulation of peptidyl-tyrosine phosphorylation	7/130	164/18888	0.0426829	6.2015	5.56944	0.000141348	0.00112228	0.000635468	TNF/VEGFA/KIT/GRM5/JAK2/HTR2A/ABL1	7
BP	GO:0051954	positive regulation of amine transport	4/130	39/18888	0.102564	14.9018	7.23466	0.000146211	0.0011584	0.00065592	ABAT/ADORA2A/OXTR/P2RX7	4
BP	GO:0032732	positive regulation of interleukin-1 production	5/130	73/18888	0.0684932	9.95153	6.3792	0.000147632	0.00116715	0.000660876	TNF/APP/JAK2/CASP1/P2RX7	5
BP	GO:0051170	import into nucleus	7/130	166/18888	0.0421687	6.12678	5.5231	0.000152372	0.00120205	0.000680636	SHH/HNRNPA1/SMO/PRKCD/MAPK14/JAK2/LRRK2	7
BP	GO:0014015	positive regulation of gliogenesis	5/130	74/18888	0.0675676	9.81705	6.32643	0.000157464	0.00123693	0.000700389	SHH/KRAS/TNF/EGFR/TSPO	5
BP	GO:0051937	catecholamine transport	5/130	74/18888	0.0675676	9.81705	6.32643	0.000157464	0.00123693	0.000700389	ABAT/ACTB/ADORA2A/OXTR/HTR2A	5
BP	GO:0044060	regulation of endocrine process	4/130	40/18888	0.1	14.5292	7.13067	0.000161596	0.00126133	0.000714207	FGFR1/F2R/TSPO/CRHR1	4
BP	GO:0052652	cyclic purine nucleotide metabolic process	4/130	40/18888	0.1	14.5292	7.13067	0.000161596	0.00126133	0.000714207	PDE10A/RORA/PDE4A/PDE4B	4
BP	GO:0062098	regulation of programmed necrotic cell death	4/130	40/18888	0.1	14.5292	7.13067	0.000161596	0.00126133	0.000714207	OGT/ASAH1/PARP1/TSPO	4
BP	GO:0022407	regulation of cell-cell adhesion	12/130	496/18888	0.0241935	3.51514	4.7255	0.000164198	0.00127894	0.000724177	SHH/TNF/ACTB/VEGFA/ELANE/PRKCD/CASP3/PRKCA/ADORA2A/MAPK14/JAK2/ABL1	12
BP	GO:0006090	pyruvate metabolic process	6/130	118/18888	0.0508475	7.38774	5.7945	0.000166165	0.00128251	0.000726199	OGT/APP/HIF1A/HTR2A/P2RX7/GCK	6
BP	GO:0042303	molting cycle	6/130	118/18888	0.0508475	7.38774	5.7945	0.000166165	0.00128251	0.000726199	SHH/NAGLU/TNF/SMO/EGFR/TERT	6
BP	GO:0042633	hair cycle	6/130	118/18888	0.0508475	7.38774	5.7945	0.000166165	0.00128251	0.000726199	SHH/NAGLU/TNF/SMO/EGFR/TERT	6
BP	GO:0050802	circadian sleep/wake cycle, sleep	3/130	16/18888	0.1875	27.2423	8.74204	0.000167088	0.00128251	0.000726199	PARP1/ADORA1/ADORA2A	3
BP	GO:0051956	negative regulation of amino acid transport	3/130	16/18888	0.1875	27.2423	8.74204	0.000167088	0.00128251	0.000726199	ABAT/TNF/ADORA1	3
BP	GO:1903599	positive regulation of autophagy of mitochondrion	3/130	16/18888	0.1875	27.2423	8.74204	0.000167088	0.00128251	0.000726199	CERS1/HTT/HIF1A	3
BP	GO:1904031	positive regulation of cyclin-dependent protein kinase activity	3/130	16/18888	0.1875	27.2423	8.74204	0.000167088	0.00128251	0.000726199	EGFR/CCND1/CCND2	3
BP	GO:0048639	positive regulation of developmental growth	7/130	169/18888	0.0414201	6.01802	5.455	0.000170205	0.00130373	0.000738212	L1CAM/FGFR1/AGRN/POU3F2/VEGFA/SMO/MAPK14	7
BP	GO:0007596	blood coagulation	8/130	226/18888	0.0353982	5.14309	5.21626	0.000172463	0.00131829	0.000746458	SHH/ACTB/F2R/PRKCD/PRKCA/ADORA2A/MAPK14/JAK2	8
BP	GO:1903532	positive regulation of secretion by cell	9/130	288/18888	0.03125	4.54038	5.04023	0.000173092	0.00132036	0.000747632	ABAT/FGFR1/HIF1A/EGFR/ADORA2A/JAK2/OXTR/P2RX7/GCK	9
BP	GO:0072524	pyridine-containing compound metabolic process	7/130	170/18888	0.0411765	5.98262	5.43266	0.000176511	0.00134367	0.000760828	OGT/APP/HIF1A/VCP/HTR2A/P2RX7/GCK	7
BP	GO:0009187	cyclic nucleotide metabolic process	4/130	41/18888	0.097561	14.1749	7.03035	0.000178116	0.00134755	0.000763025	PDE10A/RORA/PDE4A/PDE4B	4
BP	GO:0071542	dopaminergic neuron differentiation	4/130	41/18888	0.097561	14.1749	7.03035	0.000178116	0.00134755	0.000763025	SHH/VEGFA/SMO/HIF1A	4
BP	GO:1903146	regulation of autophagy of mitochondrion	4/130	41/18888	0.097561	14.1749	7.03035	0.000178116	0.00134755	0.000763025	CERS1/HTT/HIF1A/TSPO	4
BP	GO:1901990	regulation of mitotic cell cycle phase transition	10/130	356/18888	0.0280899	4.08124	4.88596	0.000179413	0.00135459	0.000767009	EZH2/KMT2E/ACTB/APP/RAD21/EGFR/CCND1/CDK4/CCND2/TERT	10
BP	GO:0009185	ribonucleoside diphosphate metabolic process	6/130	120/18888	0.05	7.26462	5.73107	0.000182149	0.00137244	0.000777117	OGT/APP/HIF1A/HTR2A/P2RX7/GCK	6
BP	GO:0007254	JNK cascade	7/130	171/18888	0.0409357	5.94764	5.4105	0.000183005	0.00137608	0.000779181	MAPK8/HRAS/TNF/MAPK10/APP/EGFR/LRRK2	7
BP	GO:0010506	regulation of autophagy	10/130	357/18888	0.0280112	4.06981	4.8748	0.00018352	0.00137715	0.000779784	CERS1/HTT/MAPK8/SETD2/GBA1/HIF1A/CASP3/TSPO/ABL1/LRRK2	10
BP	GO:0031348	negative regulation of defense response	9/130	291/18888	0.0309278	4.49358	4.99983	0.000187007	0.00140047	0.000792989	GBA1/ASH1L/PARP1/ELANE/PRKCD/RORA/ADORA1/ADORA2A/MAPK14	9
BP	GO:0006809	nitric oxide biosynthetic process	5/130	77/18888	0.0649351	9.43457	6.17393	0.000189982	0.00141129	0.000799118	NOS1/TNF/RORA/JAK2/TSPO	5
BP	GO:0032729	positive regulation of type II interferon production	5/130	77/18888	0.0649351	9.43457	6.17393	0.000189982	0.00141129	0.000799118	HRAS/TNF/JAK2/PDE4B/ABL1	5
BP	GO:0032890	regulation of organic acid transport	5/130	77/18888	0.0649351	9.43457	6.17393	0.000189982	0.00141129	0.000799118	ABAT/TNF/ADORA1/ADORA2A/P2RX7	5
BP	GO:0043536	positive regulation of blood vessel endothelial cell migration	5/130	77/18888	0.0649351	9.43457	6.17393	0.000189982	0.00141129	0.000799118	FGFR1/VEGFA/HIF1A/PRKCA/ABL1	5
BP	GO:0044242	cellular lipid catabolic process	8/130	230/18888	0.0347826	5.05365	5.14917	0.000194392	0.00143826	0.00081439	ASAH1/NEU1/NAGLU/GBA1/NAGA/HEXA/HEXB/PRKCD	8
BP	GO:0097191	extrinsic apoptotic signaling pathway	8/130	230/18888	0.0347826	5.05365	5.14917	0.000194392	0.00143826	0.00081439	HTT/FGFR1/TNF/AR/JAK2/P2RX7/RAF1/TERT	8
BP	GO:0048512	circadian behavior	4/130	42/18888	0.0952381	13.8374	6.93347	0.000195821	0.00144594	0.000818739	NAGLU/PARP1/ADORA1/ADORA2A	4
BP	GO:0031331	positive regulation of cellular catabolic process	11/130	432/18888	0.025463	3.69957	4.72528	0.000199979	0.00147252	0.000833784	CERS1/HTT/SETD2/TNF/FTO/APP/PRKCD/HIF1A/HTR2A/P2RX7/LRRK2	11
BP	GO:0050817	coagulation	8/130	231/18888	0.034632	5.03177	5.13264	0.000200217	0.00147252	0.000833784	SHH/ACTB/F2R/PRKCD/PRKCA/ADORA2A/MAPK14/JAK2	8
BP	GO:0038083	peptidyl-tyrosine autophosphorylation	3/130	17/18888	0.176471	25.6398	8.46105	0.000201873	0.00148174	0.000839009	VEGFA/EGFR/ABL1	3
BP	GO:0007599	hemostasis	8/130	233/18888	0.0343348	4.98858	5.09986	0.0002123	0.00155518	0.000880594	SHH/ACTB/F2R/PRKCD/PRKCA/ADORA2A/MAPK14/JAK2	8
BP	GO:0019098	reproductive behavior	4/130	43/18888	0.0930233	13.5156	6.83985	0.000214761	0.00156699	0.00088728	ABAT/HEXB/APP/OXTR	4
BP	GO:1904646	cellular response to amyloid-beta	4/130	43/18888	0.0930233	13.5156	6.83985	0.000214761	0.00156699	0.00088728	TNF/APP/PARP1/GRM5	4
BP	GO:0034502	protein localization to chromosome	6/130	124/18888	0.0483871	7.03027	5.60848	0.000217751	0.00158568	0.00089786	EZH2/SETD2/PARP1/RAD21/VCP/TERT	6
BP	GO:0000082	G1/S transition of mitotic cell cycle	8/130	234/18888	0.034188	4.96726	5.08361	0.000218562	0.00158845	0.00089943	EZH2/KMT2E/ACTB/EGFR/CCND1/CDK4/CCND2/TERT	8
BP	GO:0021761	limbic system development	6/130	125/18888	0.048	6.97403	5.57868	0.000227455	0.00164983	0.000934186	EZH2/POMGNT1/FGFR1/POU3F2/SMO/CASP3	6
BP	GO:0043491	phosphatidylinositol 3-kinase/protein kinase B signal transduction	9/130	299/18888	0.0301003	4.37335	4.89473	0.000228742	0.00165591	0.000937629	FGFR1/TNF/F2R/FLT1/PDGFRB/KIT/EGFR/JAK2/HTR2A	9
BP	GO:0007622	rhythmic behavior	4/130	44/18888	0.0909091	13.2084	6.74929	0.000234985	0.00169447	0.000959459	NAGLU/PARP1/ADORA1/ADORA2A	4
BP	GO:0035307	positive regulation of protein dephosphorylation	4/130	44/18888	0.0909091	13.2084	6.74929	0.000234985	0.00169447	0.000959459	GBA1/PDGFRB/PRKCD/ADORA1	4
BP	GO:0030522	intracellular receptor signaling pathway	10/130	369/18888	0.0271003	3.93746	4.74391	0.000239318	0.00171462	0.000970871	KMT2D/EZH2/MAPK8/NCOR2/TNF/PARP1/AR/RORB/RORA/JAK2	10
BP	GO:0051054	positive regulation of DNA metabolic process	9/130	301/18888	0.0299003	4.34429	4.86903	0.000240305	0.00171462	0.000970871	NSD2/HNRNPA1/FGFR1/TNF/ACTB/PARP1/PDGFRB/PRKCD/EGFR	9
BP	GO:0010522	regulation of calcium ion transport into cytosol	3/130	18/18888	0.166667	24.2154	8.20325	0.000241031	0.00171462	0.000970871	GRIN1/NOS1/P2RX7	3
BP	GO:0043116	negative regulation of vascular permeability	3/130	18/18888	0.166667	24.2154	8.20325	0.000241031	0.00171462	0.000970871	ADM/VEGFA/ADORA2A	3
BP	GO:0048368	lateral mesoderm development	3/130	18/18888	0.166667	24.2154	8.20325	0.000241031	0.00171462	0.000970871	SHH/FGFR1/SMO	3
BP	GO:0051930	regulation of sensory perception of pain	3/130	18/18888	0.166667	24.2154	8.20325	0.000241031	0.00171462	0.000970871	GRIN2D/F2R/ADORA1	3
BP	GO:0051931	regulation of sensory perception	3/130	18/18888	0.166667	24.2154	8.20325	0.000241031	0.00171462	0.000970871	GRIN2D/F2R/ADORA1	3
BP	GO:0009132	nucleoside diphosphate metabolic process	6/130	127/18888	0.0472441	6.8642	5.52005	0.000247884	0.00175997	0.000996552	OGT/APP/HIF1A/HTR2A/P2RX7/GCK	6
BP	GO:1905475	regulation of protein localization to membrane	7/130	180/18888	0.0388889	5.65026	5.21866	0.000250606	0.00177589	0.00100556	OGT/HRAS/TNF/ACTB/CDH2/AR/EGFR	7
BP	GO:0031669	cellular response to nutrient levels	8/130	239/18888	0.0334728	4.86334	5.00373	0.000252193	0.00178371	0.00100999	OGT/HNRNPA1/MAPK8/GBA1/YWHAG/FGF23/CTSK/LRRK2	8
BP	GO:1904427	positive regulation of calcium ion transmembrane transport	5/130	82/18888	0.0609756	8.85929	5.93747	0.000255269	0.00180201	0.00102036	GRIN1/HTT/F2R/P2RX7/ABL1	5
BP	GO:0001936	regulation of endothelial cell proliferation	7/130	181/18888	0.038674	5.61904	5.19815	0.000259216	0.0018229	0.00103219	NRAS/FGFR1/TNF/VEGFA/FLT1/HIF1A/PRKCA	7
BP	GO:0043414	macromolecule methylation	7/130	181/18888	0.038674	5.61904	5.19815	0.000259216	0.0018229	0.00103219	PRMT7/EZH2/EHMT1/KMT2E/SETD2/KMT2A/PARP1	7
BP	GO:0001503	ossification	11/130	446/18888	0.0246637	3.58344	4.59645	0.000262961	0.00184573	0.00104511	SHH/SETD2/TNF/FGF23/SMO/CTSK/HIF1A/EGFR/RORB/MAPK14/P2RX7	11
BP	GO:0070085	glycosylation	8/130	241/18888	0.033195	4.82298	4.9724	0.000266781	0.00186544	0.00105627	OGT/MGAT2/ST3GAL3/DPAGT1/GALNT2/POMGNT1/GBA1/B4GALT1	8
BP	GO:0071356	cellular response to tumor necrosis factor	8/130	241/18888	0.033195	4.82298	4.9724	0.000266781	0.00186544	0.00105627	ASAH1/GBA1/TNF/CTSK/RORA/MAPK14/JAK2/CASP1	8
BP	GO:0006109	regulation of carbohydrate metabolic process	7/130	182/18888	0.0384615	5.58817	5.17779	0.000268062	0.00187086	0.00105934	OGT/APP/HIF1A/RORA/HTR2A/P2RX7/GCK	7
BP	GO:0098773	skin epidermis development	6/130	129/18888	0.0465116	6.75778	5.46267	0.000269729	0.00187894	0.00106392	SHH/NAGLU/GBA1/TNF/SMO/EGFR	6
BP	GO:0043086	negative regulation of catalytic activity	11/130	449/18888	0.0244989	3.5595	4.56951	0.000278443	0.00193599	0.00109622	NOS1/CERS1/HRAS/GBA1/YWHAG/TNF/VEGFA/PRKCD/RAF1/ABL1/LRRK2	11
BP	GO:0098661	inorganic anion transmembrane transport	6/130	130/18888	0.0461538	6.7058	5.43444	0.000281205	0.00195152	0.00110501	GABRB3/GABRA3/GABRG2/GABRA1/GABRA5/GABRA2	6
BP	GO:0022410	circadian sleep/wake cycle process	3/130	19/18888	0.157895	22.9409	7.96556	0.000284787	0.00196044	0.00111006	PARP1/ADORA1/ADORA2A	3
BP	GO:0042749	regulation of circadian sleep/wake cycle	3/130	19/18888	0.157895	22.9409	7.96556	0.000284787	0.00196044	0.00111006	PARP1/ADORA1/ADORA2A	3
BP	GO:0060977	coronary vasculature morphogenesis	3/130	19/18888	0.157895	22.9409	7.96556	0.000284787	0.00196044	0.00111006	SETD2/VEGFA/PDGFRB	3
BP	GO:1902074	response to salt	3/130	19/18888	0.157895	22.9409	7.96556	0.000284787	0.00196044	0.00111006	HNRNPA1/FGFR1/FGF23	3
BP	GO:0014855	striated muscle cell proliferation	5/130	84/18888	0.0595238	8.64835	5.84847	0.000285676	0.00196044	0.00111006	SHH/FGFR1/MAPK14/JAK2/ABL1	5
BP	GO:0046209	nitric oxide metabolic process	5/130	84/18888	0.0595238	8.64835	5.84847	0.000285676	0.00196044	0.00111006	NOS1/TNF/RORA/JAK2/TSPO	5
BP	GO:2000045	regulation of G1/S transition of mitotic cell cycle	7/130	185/18888	0.0378378	5.49755	5.11759	0.000296069	0.00202799	0.00114831	EZH2/KMT2E/ACTB/EGFR/CCND1/CCND2/TERT	7
BP	GO:2001057	reactive nitrogen species metabolic process	5/130	85/18888	0.0588235	8.54661	5.80507	0.000301873	0.00206392	0.00116865	NOS1/TNF/RORA/JAK2/TSPO	5
BP	GO:0045933	positive regulation of muscle contraction	4/130	47/18888	0.0851064	12.3653	6.49438	0.00030387	0.0020699	0.00117204	ABAT/F2R/KIT/OXTR	4
BP	GO:1900271	regulation of long-term synaptic potentiation	4/130	47/18888	0.0851064	12.3653	6.49438	0.00030387	0.0020699	0.00117204	APP/ADORA1/ADORA2A/ABL1	4
BP	GO:0015850	organic hydroxy compound transport	9/130	311/18888	0.0289389	4.2046	4.7438	0.000305662	0.00207614	0.00117558	NOS1/SHH/ABAT/ACTB/ADORA2A/OXTR/HTR2A/TSPO/CRHR1	9
BP	GO:0098727	maintenance of cell number	7/130	186/18888	0.0376344	5.46799	5.09782	0.000305911	0.00207614	0.00117558	OGT/EZH2/ACTB/CDH2/KIT/SMO/RAF1	7
BP	GO:0007409	axonogenesis	11/130	455/18888	0.0241758	3.51256	4.51632	0.000311726	0.00210786	0.00119354	L1CAM/SHH/NCAM1/POU3F2/ACTB/CDH2/APP/VEGFA/SMO/MAP2K1/ABL1	11
BP	GO:1901987	regulation of cell cycle phase transition	11/130	455/18888	0.0241758	3.51256	4.51632	0.000311726	0.00210786	0.00119354	EZH2/KMT2E/ACTB/APP/RAD21/EGFR/MAPK14/CCND1/CDK4/CCND2/TERT	11
BP	GO:0045766	positive regulation of angiogenesis	7/130	187/18888	0.0374332	5.43875	5.07819	0.000316013	0.00213295	0.00120774	ADM/VEGFA/FLT1/HIF1A/PRKCA/TERT/ABL1	7
BP	GO:0032102	negative regulation of response to external stimulus	11/130	456/18888	0.0241228	3.50486	4.50754	0.000317587	0.00213966	0.00121154	GRIN3A/GBA1/ASH1L/TNF/PARP1/ELANE/PRKCD/RORA/ADORA1/ADORA2A/MAPK14	11
BP	GO:0048864	stem cell development	5/130	86/18888	0.0581395	8.44723	5.76238	0.000318756	0.00214362	0.00121379	SHH/SETD2/CDH2/SMO/HIF1A	5
BP	GO:0045444	fat cell differentiation	8/130	248/18888	0.0322581	4.68685	4.86539	0.000323384	0.00217079	0.00122917	PRDM16/TNF/FTO/RORA/MAPK14/HTR2C/HTR2A/CCND1	8
BP	GO:0045776	negative regulation of blood pressure	4/130	48/18888	0.0833333	12.1077	6.41452	0.000329739	0.00220943	0.00125105	NOS1/ABAT/TNF/ADORA1	4
BP	GO:0051384	response to glucocorticoid	6/130	134/18888	0.0447761	6.50563	5.32442	0.000330997	0.00220965	0.00125117	GBA1/ADM/TNF/EGFR/CASP3/JAK2	6
BP	GO:0014048	regulation of glutamate secretion	3/130	20/18888	0.15	21.7938	7.74545	0.000333362	0.00220965	0.00125117	ADORA1/ADORA2A/P2RX7	3
BP	GO:0030813	positive regulation of nucleotide catabolic process	3/130	20/18888	0.15	21.7938	7.74545	0.000333362	0.00220965	0.00125117	APP/HTR2A/P2RX7	3
BP	GO:0033123	positive regulation of purine nucleotide catabolic process	3/130	20/18888	0.15	21.7938	7.74545	0.000333362	0.00220965	0.00125117	APP/HTR2A/P2RX7	3
BP	GO:0034244	negative regulation of transcription elongation by RNA polymerase II	3/130	20/18888	0.15	21.7938	7.74545	0.000333362	0.00220965	0.00125117	SHH/EZH2/PARP1	3
BP	GO:0045821	positive regulation of glycolytic process	3/130	20/18888	0.15	21.7938	7.74545	0.000333362	0.00220965	0.00125117	APP/HTR2A/P2RX7	3
BP	GO:1904018	positive regulation of vasculature development	7/130	190/18888	0.0368421	5.35287	5.02013	0.000347939	0.00230214	0.00130354	ADM/VEGFA/FLT1/HIF1A/PRKCA/TERT/ABL1	7
BP	GO:0001892	embryonic placenta development	5/130	88/18888	0.0568182	8.25524	5.67903	0.00035466	0.00234208	0.00132616	SETD2/ADM/HIF1A/EGFR/MAP2K1	5
BP	GO:0014075	response to amine	4/130	49/18888	0.0816327	11.8606	6.33699	0.000357148	0.00234208	0.00132616	GRIN2A/ADORA2A/JAK2/OXTR	4
BP	GO:0035272	exocrine system development	4/130	49/18888	0.0816327	11.8606	6.33699	0.000357148	0.00234208	0.00132616	SHH/FGFR1/TNF/EGFR	4
BP	GO:0046427	positive regulation of receptor signaling pathway via JAK-STAT	4/130	49/18888	0.0816327	11.8606	6.33699	0.000357148	0.00234208	0.00132616	TNF/F2R/KIT/JAK2	4
BP	GO:0048538	thymus development	4/130	49/18888	0.0816327	11.8606	6.33699	0.000357148	0.00234208	0.00132616	SHH/MAP2K1/RAF1/ABL1	4
BP	GO:0030168	platelet activation	6/130	136/18888	0.0441176	6.40995	5.27107	0.000358354	0.00234582	0.00132828	ACTB/F2R/PRKCD/PRKCA/MAPK14/JAK2	6
BP	GO:0097193	intrinsic apoptotic signaling pathway	9/130	319/18888	0.0282132	4.09916	4.64734	0.000367983	0.00240459	0.00136156	HRAS/TNF/PARP1/PRKCD/HIF1A/CASP3/JAK2/ABL1/LRRK2	9
BP	GO:0051896	regulation of phosphatidylinositol 3-kinase/protein kinase B signal transduction	8/130	253/18888	0.0316206	4.59422	4.79138	0.000369536	0.00241047	0.00136489	FGFR1/TNF/F2R/FLT1/PDGFRB/KIT/EGFR/JAK2	8
BP	GO:1904375	regulation of protein localization to cell periphery	6/130	137/18888	0.0437956	6.36317	5.2448	0.00037268	0.00242669	0.00137407	OGT/HRAS/TNF/ACTB/AR/EGFR	6
BP	GO:0016055	Wnt signaling pathway	11/130	466/18888	0.0236052	3.42965	4.42107	0.000381494	0.00247971	0.00140409	SHH/PORCN/CDH2/APP/EGFR/VCP/MAPK14/CCND1/TERT/ABL1/LRRK2	11
BP	GO:0030324	lung development	7/130	193/18888	0.0362694	5.26967	4.96329	0.000382402	0.00248124	0.00140496	SHH/KRAS/FGFR1/TNF/VEGFA/EGFR/MAP2K1	7
BP	GO:0043457	regulation of cellular respiration	4/130	50/18888	0.08	11.6234	6.26167	0.00038615	0.0024921	0.00141111	PRDM16/TNF/HIF1A/VCP	4
BP	GO:0042359	vitamin D metabolic process	3/130	21/18888	0.142857	20.756	7.54081	0.000386971	0.0024921	0.00141111	FGFR1/TNF/FGF23	3
BP	GO:0042745	circadian sleep/wake cycle	3/130	21/18888	0.142857	20.756	7.54081	0.000386971	0.0024921	0.00141111	PARP1/ADORA1/ADORA2A	3
BP	GO:0044321	response to leptin	3/130	21/18888	0.142857	20.756	7.54081	0.000386971	0.0024921	0.00141111	FGF23/CCND1/GCK	3
BP	GO:1904064	positive regulation of cation transmembrane transport	6/130	138/18888	0.0434783	6.31706	5.21879	0.000387451	0.0024921	0.00141111	GRIN1/NOS1/HTT/F2R/P2RX7/ABL1	6
BP	GO:0007422	peripheral nervous system development	5/130	90/18888	0.0555556	8.07179	5.59828	0.000393541	0.00252249	0.00142831	HRAS/POU3F2/NDRG1/MAP2K1/RAF1	5
BP	GO:0048145	regulation of fibroblast proliferation	5/130	90/18888	0.0555556	8.07179	5.59828	0.000393541	0.00252249	0.00142831	HRAS/KMT2A/EGFR/CDK4/ABL1	5
BP	GO:0198738	cell-cell signaling by wnt	11/130	468/18888	0.0235043	3.41499	4.40406	0.000395495	0.00253062	0.00143291	SHH/PORCN/CDH2/APP/EGFR/VCP/MAPK14/CCND1/TERT/ABL1/LRRK2	11
BP	GO:0001101	response to acid chemical	6/130	139/18888	0.0431655	6.27161	5.19304	0.000402675	0.0025721	0.00145641	GRIN1/GRIN2D/TNF/VEGFA/EGFR/CASP3	6
BP	GO:0050885	neuromuscular process controlling balance	4/130	51/18888	0.0784314	11.3955	6.18847	0.000416796	0.00265771	0.00150488	HEXA/HEXB/APP/ABL1	4
BP	GO:0007498	mesoderm development	6/130	140/18888	0.0428571	6.22681	5.16753	0.000418363	0.0026631	0.00150793	SHH/FGFR1/SETD2/VEGFA/SMO/JAK2	6
BP	GO:0045927	positive regulation of growth	8/130	258/18888	0.0310078	4.50519	4.71927	0.000420923	0.00267478	0.00151454	L1CAM/FGFR1/AGRN/POU3F2/VEGFA/SMO/EGFR/MAPK14	8
BP	GO:0030323	respiratory tube development	7/130	197/18888	0.035533	5.16267	4.88932	0.000432549	0.00273923	0.00155104	SHH/KRAS/FGFR1/TNF/VEGFA/EGFR/MAP2K1	7
BP	GO:0090276	regulation of peptide hormone secretion	7/130	197/18888	0.035533	5.16267	4.88932	0.000432549	0.00273923	0.00155104	ABAT/TNF/HIF1A/EGFR/JAK2/HTR2C/GCK	7
BP	GO:0032409	regulation of transporter activity	8/130	260/18888	0.0307692	4.47053	4.69094	0.00044304	0.00280086	0.00158594	NOS1/HTT/ACTB/APP/PRKCD/GRM5/SLC6A9/CRHR1	8
BP	GO:0060445	branching involved in salivary gland morphogenesis	3/130	22/18888	0.136364	19.8126	7.34987	0.000445824	0.00281364	0.00159317	SHH/FGFR1/TNF	3
BP	GO:0050886	endocrine process	5/130	93/18888	0.0537634	7.81141	5.48173	0.000457795	0.00288426	0.00163316	FGFR1/F2R/OXTR/TSPO/CRHR1	5
BP	GO:0001701	in utero embryonic development	10/130	401/18888	0.0249377	3.62325	4.42016	0.000461554	0.00290299	0.00164377	UPB1/FGFR1/SETD2/ADM/VEGFA/SMO/AR/HIF1A/EGFR/MAP2K1	10
BP	GO:0044843	cell cycle G1/S phase transition	8/130	262/18888	0.0305344	4.43641	4.66289	0.000466093	0.00292656	0.00165711	EZH2/KMT2E/ACTB/EGFR/CCND1/CDK4/CCND2/TERT	8
BP	GO:0001889	liver development	6/130	143/18888	0.041958	6.09618	5.09249	0.000468307	0.00293546	0.00166215	UPB1/EZH2/NAGLU/TNF/EGFR/CCND1	6
BP	GO:0071248	cellular response to metal ion	7/130	200/18888	0.035	5.08523	4.83515	0.000473503	0.00296301	0.00167775	SHH/MAPK8/PARP1/EGFR/TSPO/SCN5A/LRRK2	7
BP	GO:0001942	hair follicle development	5/130	94/18888	0.0531915	7.72831	5.44403	0.000480875	0.00299346	0.00169499	SHH/NAGLU/TNF/SMO/EGFR	5
BP	GO:0019915	lipid storage	5/130	94/18888	0.0531915	7.72831	5.44403	0.000480875	0.00299346	0.00169499	GBA1/HEXA/HEXB/TNF/FTO	5
BP	GO:0050433	regulation of catecholamine secretion	4/130	53/18888	0.0754717	10.9655	6.04801	0.000483235	0.00299346	0.00169499	ABAT/ADORA2A/OXTR/HTR2A	4
BP	GO:0050850	positive regulation of calcium-mediated signaling	4/130	53/18888	0.0754717	10.9655	6.04801	0.000483235	0.00299346	0.00169499	TNF/APP/PDGFRB/HTR2C	4
BP	GO:0050982	detection of mechanical stimulus	4/130	53/18888	0.0754717	10.9655	6.04801	0.000483235	0.00299346	0.00169499	TNF/CDH2/KIT/HTR2A	4
BP	GO:1904894	positive regulation of receptor signaling pathway via STAT	4/130	53/18888	0.0754717	10.9655	6.04801	0.000483235	0.00299346	0.00169499	TNF/F2R/KIT/JAK2	4
BP	GO:0046887	positive regulation of hormone secretion	6/130	144/18888	0.0416667	6.05385	5.06795	0.000485948	0.00300523	0.00170165	ABAT/FGFR1/HIF1A/EGFR/JAK2/GCK	6
BP	GO:0001935	endothelial cell proliferation	7/130	202/18888	0.0346535	5.03488	4.79964	0.000502483	0.00309601	0.00175306	NRAS/FGFR1/TNF/VEGFA/FLT1/HIF1A/PRKCA	7
BP	GO:0014706	striated muscle tissue development	8/130	265/18888	0.0301887	4.38618	4.62135	0.000502491	0.00309601	0.00175306	SHH/NAGLU/FGFR1/VEGFA/PDGFRB/MAPK14/SCN5A/ABL1	8
BP	GO:0014020	primary neural tube formation	5/130	95/18888	0.0526316	7.64696	5.40688	0.000504821	0.00309601	0.00175306	SETD2/ADM/HIF1A/CASP3/ABL1	5
BP	GO:0033555	multicellular organismal response to stress	5/130	95/18888	0.0526316	7.64696	5.40688	0.000504821	0.00309601	0.00175306	NOS1/GABRA5/HTR2C/TSPO/CRHR1	5
BP	GO:0090316	positive regulation of intracellular protein transport	5/130	95/18888	0.0526316	7.64696	5.40688	0.000504821	0.00309601	0.00175306	SHH/SMO/PRKCD/MAPK14/JAK2	5
BP	GO:0015874	norepinephrine transport	3/130	23/18888	0.130435	18.9512	7.17114	0.000510126	0.0031079	0.00175979	ACTB/ADORA2A/OXTR	3
BP	GO:0032785	negative regulation of DNA-templated transcription, elongation	3/130	23/18888	0.130435	18.9512	7.17114	0.000510126	0.0031079	0.00175979	SHH/EZH2/PARP1	3
BP	GO:0038128	ERBB2 signaling pathway	3/130	23/18888	0.130435	18.9512	7.17114	0.000510126	0.0031079	0.00175979	EGFR/MAP2K1/RAF1	3
BP	GO:0046058	cAMP metabolic process	3/130	23/18888	0.130435	18.9512	7.17114	0.000510126	0.0031079	0.00175979	PDE10A/PDE4A/PDE4B	3
BP	GO:0022408	negative regulation of cell-cell adhesion	7/130	203/18888	0.0344828	5.01008	4.78205	0.000517495	0.00314203	0.00177912	SHH/VEGFA/PRKCD/CASP3/ADORA2A/JAK2/ABL1	7
BP	GO:0032092	positive regulation of protein binding	4/130	54/18888	0.0740741	10.7624	5.98056	0.000519133	0.00314203	0.00177912	APP/TERT/ABL1/LRRK2	4
BP	GO:0035306	positive regulation of dephosphorylation	4/130	54/18888	0.0740741	10.7624	5.98056	0.000519133	0.00314203	0.00177912	GBA1/PDGFRB/PRKCD/ADORA1	4
BP	GO:0048146	positive regulation of fibroblast proliferation	4/130	54/18888	0.0740741	10.7624	5.98056	0.000519133	0.00314203	0.00177912	HRAS/EGFR/CDK4/ABL1	4
BP	GO:0030177	positive regulation of Wnt signaling pathway	6/130	146/18888	0.0410959	5.97092	5.01955	0.000522783	0.00314351	0.00177995	SHH/EGFR/VCP/TERT/ABL1/LRRK2	6
BP	GO:0045598	regulation of fat cell differentiation	6/130	146/18888	0.0410959	5.97092	5.01955	0.000522783	0.00314351	0.00177995	TNF/FTO/RORA/MAPK14/HTR2C/HTR2A	6
BP	GO:0046467	membrane lipid biosynthetic process	6/130	146/18888	0.0410959	5.97092	5.01955	0.000522783	0.00314351	0.00177995	CERS1/ASAH1/ST3GAL3/GBA1/PRKCD/P2RX7	6
BP	GO:0061008	hepaticobiliary system development	6/130	146/18888	0.0410959	5.97092	5.01955	0.000522783	0.00314351	0.00177995	UPB1/EZH2/NAGLU/TNF/EGFR/CCND1	6
BP	GO:0032386	regulation of intracellular transport	8/130	267/18888	0.0299625	4.35333	4.59399	0.000528014	0.0031698	0.00179484	SHH/SETD2/SMO/PRKCD/MAPK14/JAK2/MAP2K1/LRRK2	8
BP	GO:0018107	peptidyl-threonine phosphorylation	5/130	96/18888	0.0520833	7.56731	5.37027	0.000529653	0.00317448	0.00179749	MAPK8/APP/PRKCD/PRKCA/LRRK2	5
BP	GO:0051346	negative regulation of hydrolase activity	7/130	204/18888	0.0343137	4.98552	4.76459	0.000532861	0.00318853	0.00180545	NOS1/HRAS/TNF/VEGFA/RAF1/ABL1/LRRK2	7
BP	GO:0035264	multicellular organism growth	6/130	147/18888	0.0408163	5.9303	4.99569	0.000541996	0.00323795	0.00183343	GAMT/POU3F2/FTO/APP/SMO/AR	6
BP	GO:0048469	cell maturation	7/130	205/18888	0.0341463	4.9612	4.74723	0.00054859	0.00327204	0.00185273	FGFR1/AGRN/GBA1/APP/VEGFA/HIF1A/LRRK2	7
BP	GO:0022404	molting cycle process	5/130	97/18888	0.0515464	7.48929	5.33419	0.000555392	0.00330195	0.00186967	SHH/NAGLU/TNF/SMO/EGFR	5
BP	GO:0022405	hair cycle process	5/130	97/18888	0.0515464	7.48929	5.33419	0.000555392	0.00330195	0.00186967	SHH/NAGLU/TNF/SMO/EGFR	5
BP	GO:0060425	lung morphogenesis	4/130	55/18888	0.0727273	10.5667	5.91486	0.000556889	0.00330552	0.00187169	SHH/KRAS/TNF/MAP2K1	4
BP	GO:0032869	cellular response to insulin stimulus	7/130	206/18888	0.0339806	4.93712	4.72999	0.000564685	0.00334642	0.00189485	OGT/HRAS/YWHAG/PARP1/PRKCD/RAF1/GCK	7
BP	GO:0032891	negative regulation of organic acid transport	3/130	24/18888	0.125	18.1615	7.00333	0.000580079	0.00342664	0.00194027	ABAT/TNF/ADORA1	3
BP	GO:0051957	positive regulation of amino acid transport	3/130	24/18888	0.125	18.1615	7.00333	0.000580079	0.00342664	0.00194027	ABAT/ADORA2A/P2RX7	3
BP	GO:0006942	regulation of striated muscle contraction	5/130	98/18888	0.0510204	7.41287	5.29861	0.00058206	0.00342738	0.00194069	NOS1/SCN4A/ADORA1/PDE4B/SCN5A	5
BP	GO:0048534	hematopoietic or lymphoid organ development	5/130	98/18888	0.0510204	7.41287	5.29861	0.00058206	0.00342738	0.00194069	SHH/KMT2A/MAP2K1/RAF1/ABL1	5
BP	GO:0007528	neuromuscular junction development	4/130	56/18888	0.0714286	10.378	5.85082	0.000596556	0.00350714	0.00198585	AGRN/APP/F2R/LRRK2	4
BP	GO:0030111	regulation of Wnt signaling pathway	9/130	342/18888	0.0263158	3.82348	4.38665	0.000608023	0.00356887	0.00202081	SHH/CDH2/APP/EGFR/VCP/MAPK14/TERT/ABL1/LRRK2	9
BP	GO:0006835	dicarboxylic acid transport	5/130	99/18888	0.0505051	7.338	5.26354	0.000609678	0.00357291	0.00202309	ABAT/TNF/ADORA1/ADORA2A/P2RX7	5
BP	GO:0034614	cellular response to reactive oxygen species	6/130	151/18888	0.0397351	5.7732	4.9024	0.000624407	0.00364764	0.00206541	EZH2/MAPK8/PRKCD/EGFR/ABL1/LRRK2	6
BP	GO:0120161	regulation of cold-induced thermogenesis	6/130	151/18888	0.0397351	5.7732	4.9024	0.000624407	0.00364764	0.00206541	PRDM16/OGT/EHMT1/VEGFA/JAK2/OXTR	6
BP	GO:0019935	cyclic-nucleotide-mediated signaling	5/130	100/18888	0.05	7.26462	5.22894	0.000638267	0.00371685	0.0021046	ADM/PDE10A/HTR2C/PDE4A/PDE4B	5
BP	GO:2001237	negative regulation of extrinsic apoptotic signaling pathway	5/130	100/18888	0.05	7.26462	5.22894	0.000638267	0.00371685	0.0021046	HTT/TNF/AR/RAF1/TERT	5
BP	GO:0106106	cold-induced thermogenesis	6/130	152/18888	0.0394737	5.73522	4.87959	0.000646452	0.00375858	0.00212823	PRDM16/OGT/EHMT1/VEGFA/JAK2/OXTR	6
BP	GO:1902806	regulation of cell cycle G1/S phase transition	7/130	211/18888	0.0331754	4.82012	4.64542	0.000650895	0.00377846	0.00213949	EZH2/KMT2E/ACTB/EGFR/CCND1/CCND2/TERT	7
BP	GO:0035994	response to muscle stretch	3/130	25/18888	0.12	17.4351	6.84536	0.000655877	0.00379545	0.0021491	CDH2/MAPK14/RAF1	3
BP	GO:0046697	decidualization	3/130	25/18888	0.12	17.4351	6.84536	0.000655877	0.00379545	0.0021491	ASH1L/PARP1/CTSB	3
BP	GO:0042594	response to starvation	7/130	212/18888	0.0330189	4.79739	4.62883	0.000669327	0.00386722	0.00218974	HNRNPA1/MAPK8/GBA1/YWHAG/ADM/CTSK/LRRK2	7
BP	GO:0048008	platelet-derived growth factor receptor signaling pathway	4/130	58/18888	0.0689655	10.0202	5.72747	0.000681839	0.00393336	0.00222719	VEGFA/PDGFRB/JAK2/ABL1	4
BP	GO:0034767	positive regulation of monoatomic ion transmembrane transport	6/130	154/18888	0.038961	5.66074	4.83459	0.000692351	0.00398777	0.002258	GRIN1/NOS1/HTT/F2R/P2RX7/ABL1	6
BP	GO:0001841	neural tube formation	5/130	102/18888	0.0490196	7.12217	5.16117	0.000698446	0.00401661	0.00227433	SETD2/ADM/HIF1A/CASP3/ABL1	5
BP	GO:1901888	regulation of cell junction assembly	7/130	215/18888	0.0325581	4.73045	4.57966	0.000727123	0.00415814	0.00235447	OGT/AGRN/TNF/APP/VEGFA/OXTR/ABL1	7
BP	GO:0050432	catecholamine secretion	4/130	59/18888	0.0677966	9.85033	5.66802	0.000727562	0.00415814	0.00235447	ABAT/ADORA2A/OXTR/HTR2A	4
BP	GO:0060135	maternal process involved in female pregnancy	4/130	59/18888	0.0677966	9.85033	5.66802	0.000727562	0.00415814	0.00235447	ASH1L/PARP1/AR/CTSB	4
BP	GO:0090497	mesenchymal cell migration	4/130	59/18888	0.0677966	9.85033	5.66802	0.000727562	0.00415814	0.00235447	SHH/CDH2/SMO/HIF1A	4
BP	GO:0002053	positive regulation of mesenchymal cell proliferation	3/130	26/18888	0.115385	16.7645	6.69627	0.000737711	0.00420313	0.00237994	SHH/FGFR1/SMO	3
BP	GO:0021697	cerebellar cortex formation	3/130	26/18888	0.115385	16.7645	6.69627	0.000737711	0.00420313	0.00237994	GBA1/RORA/MAP2K1	3
BP	GO:0043535	regulation of blood vessel endothelial cell migration	6/130	156/18888	0.0384615	5.58817	4.79037	0.000740735	0.00421386	0.00238602	FGFR1/TNF/VEGFA/HIF1A/PRKCA/ABL1	6
BP	GO:0002064	epithelial cell development	7/130	216/18888	0.0324074	4.70855	4.56347	0.000747243	0.00424434	0.00240328	B4GALT1/TNF/CDH2/VEGFA/SMO/AR/HIF1A	7
BP	GO:0009895	negative regulation of catabolic process	9/130	353/18888	0.0254958	3.70434	4.26984	0.000761517	0.00431877	0.00244542	OGT/SHH/TNF/GRIN2A/EGFR/ADORA1/MAPK14/TSPO/LRRK2	9
BP	GO:2001236	regulation of extrinsic apoptotic signaling pathway	6/130	157/18888	0.0382166	5.55257	4.76855	0.000765887	0.00433689	0.00245568	HTT/FGFR1/TNF/AR/RAF1/TERT	6
BP	GO:0006940	regulation of smooth muscle contraction	4/130	60/18888	0.0666667	9.68615	5.60998	0.000775413	0.00437072	0.00247484	ABAT/F2R/KIT/OXTR	4
BP	GO:0022029	telencephalon cell migration	4/130	60/18888	0.0666667	9.68615	5.60998	0.000775413	0.00437072	0.00247484	ADGRG1/POU3F2/EGFR/LRRK2	4
BP	GO:0046686	response to cadmium ion	4/130	60/18888	0.0666667	9.68615	5.60998	0.000775413	0.00437072	0.00247484	MAPK8/KIT/EGFR/TERT	4
BP	GO:0006865	amino acid transport	6/130	158/18888	0.0379747	5.51743	4.74691	0.000791694	0.00445569	0.00252295	ABAT/TNF/SLC6A9/ADORA1/ADORA2A/P2RX7	6
BP	GO:0031102	neuron projection regeneration	4/130	61/18888	0.0655738	9.52736	5.55327	0.000825445	0.00461929	0.00261559	ADM/JAK2/MAP2K1/TSPO	4
BP	GO:0048010	vascular endothelial growth factor receptor signaling pathway	4/130	61/18888	0.0655738	9.52736	5.55327	0.000825445	0.00461929	0.00261559	VEGFA/FLT1/HIF1A/MAPK14	4
BP	GO:0007205	protein kinase C-activating G protein-coupled receptor signaling pathway	3/130	27/18888	0.111111	16.1436	6.55523	0.000825768	0.00461929	0.00261559	F2R/GRM5/ADORA2A	3
BP	GO:0016540	protein autoprocessing	3/130	27/18888	0.111111	16.1436	6.55523	0.000825768	0.00461929	0.00261559	SHH/PARP1/CASP1	3
BP	GO:0060541	respiratory system development	7/130	220/18888	0.0318182	4.62294	4.4997	0.000832176	0.0046481	0.0026319	SHH/KRAS/FGFR1/TNF/VEGFA/EGFR/MAP2K1	7
BP	GO:0061448	connective tissue development	8/130	288/18888	0.0277778	4.0359	4.32202	0.00086509	0.00482464	0.00273186	HRAS/FGFR1/FTO/PARP1/PDGFRB/CTSK/HIF1A/MAPK14	8
BP	GO:0006606	protein import into nucleus	6/130	161/18888	0.0372671	5.41462	4.68309	0.000873165	0.00486233	0.00275321	SHH/SMO/PRKCD/MAPK14/JAK2/LRRK2	6
BP	GO:0006939	smooth muscle contraction	5/130	108/18888	0.0462963	6.7265	4.96836	0.000904586	0.00501844	0.0028416	ABAT/F2R/KIT/OXTR/HTR2A	5
BP	GO:0060537	muscle tissue development	10/130	438/18888	0.0228311	3.31718	4.08468	0.000909934	0.00501844	0.0028416	SHH/KRAS/NAGLU/FGFR1/VEGFA/PDGFRB/SMO/MAPK14/SCN5A/ABL1	10
BP	GO:0003156	regulation of animal organ formation	3/130	28/18888	0.107143	15.567	6.42154	0.000920229	0.00501844	0.0028416	SHH/FGFR1/AR	3
BP	GO:0010971	positive regulation of G2/M transition of mitotic cell cycle	3/130	28/18888	0.107143	15.567	6.42154	0.000920229	0.00501844	0.0028416	APP/CCND1/CDK4	3
BP	GO:0014047	glutamate secretion	3/130	28/18888	0.107143	15.567	6.42154	0.000920229	0.00501844	0.0028416	ADORA1/ADORA2A/P2RX7	3
BP	GO:0021680	cerebellar Purkinje cell layer development	3/130	28/18888	0.107143	15.567	6.42154	0.000920229	0.00501844	0.0028416	NAGLU/GBA1/RORA	3
BP	GO:0042634	regulation of hair cycle	3/130	28/18888	0.107143	15.567	6.42154	0.000920229	0.00501844	0.0028416	TNF/SMO/TERT	3
BP	GO:0044342	type B pancreatic cell proliferation	3/130	28/18888	0.107143	15.567	6.42154	0.000920229	0.00501844	0.0028416	MAP2K1/CDK4/RAF1	3
BP	GO:0050999	regulation of nitric-oxide synthase activity	3/130	28/18888	0.107143	15.567	6.42154	0.000920229	0.00501844	0.0028416	HIF1A/EGFR/TERT	3
BP	GO:0051953	negative regulation of amine transport	3/130	28/18888	0.107143	15.567	6.42154	0.000920229	0.00501844	0.0028416	ABAT/TNF/ADORA1	3
BP	GO:0060402	calcium ion transport into cytosol	3/130	28/18888	0.107143	15.567	6.42154	0.000920229	0.00501844	0.0028416	GRIN1/NOS1/P2RX7	3
BP	GO:0062149	detection of stimulus involved in sensory perception of pain	3/130	28/18888	0.107143	15.567	6.42154	0.000920229	0.00501844	0.0028416	TNF/ADORA1/HTR2A	3
BP	GO:0090330	regulation of platelet aggregation	3/130	28/18888	0.107143	15.567	6.42154	0.000920229	0.00501844	0.0028416	PRKCD/PRKCA/JAK2	3
BP	GO:0090594	inflammatory response to wounding	3/130	28/18888	0.107143	15.567	6.42154	0.000920229	0.00501844	0.0028416	TNF/F2R/HIF1A	3
BP	GO:0021885	forebrain cell migration	4/130	63/18888	0.0634921	9.22491	5.44369	0.000932271	0.00507661	0.00287454	ADGRG1/POU3F2/EGFR/LRRK2	4
BP	GO:0002526	acute inflammatory response	5/130	109/18888	0.0458716	6.66478	4.93765	0.000942913	0.005127	0.00290307	B4GALT1/ASH1L/TNF/ELANE/ADORA1	5
BP	GO:0006486	protein glycosylation	7/130	225/18888	0.0311111	4.52021	4.4221	0.000948881	0.0051443	0.00291287	OGT/MGAT2/ST3GAL3/DPAGT1/GALNT2/POMGNT1/B4GALT1	7
BP	GO:0043413	macromolecule glycosylation	7/130	225/18888	0.0311111	4.52021	4.4221	0.000948881	0.0051443	0.00291287	OGT/MGAT2/ST3GAL3/DPAGT1/GALNT2/POMGNT1/B4GALT1	7
BP	GO:0001708	cell fate specification	5/130	110/18888	0.0454545	6.6042	4.90733	0.000982435	0.00531061	0.00300704	SHH/FGFR1/POU3F2/SMO/AR	5
BP	GO:0048144	fibroblast proliferation	5/130	110/18888	0.0454545	6.6042	4.90733	0.000982435	0.00531061	0.00300704	HRAS/KMT2A/EGFR/CDK4/ABL1	5
BP	GO:0008631	intrinsic apoptotic signaling pathway in response to oxidative stress	4/130	64/18888	0.0625	9.08077	5.39072	0.000989173	0.00533922	0.00302323	PARP1/PRKCD/HIF1A/JAK2	4
BP	GO:0007263	nitric oxide mediated signal transduction	3/130	29/18888	0.103448	15.0302	6.29455	0.00102127	0.0054668	0.00309548	NOS1/VEGFA/EGFR	3
BP	GO:0009312	oligosaccharide biosynthetic process	3/130	29/18888	0.103448	15.0302	6.29455	0.00102127	0.0054668	0.00309548	MGAT2/ST3GAL3/B4GALT1	3
BP	GO:0001938	positive regulation of endothelial cell proliferation	5/130	111/18888	0.045045	6.5447	4.87738	0.00102318	0.0054668	0.00309548	NRAS/FGFR1/VEGFA/HIF1A/PRKCA	5
BP	GO:0043280	positive regulation of cysteine-type endopeptidase activity involved in apoptotic process	5/130	111/18888	0.045045	6.5447	4.87738	0.00102318	0.0054668	0.00309548	TNF/F2R/VCP/JAK2/CASP1	5
BP	GO:0045445	myoblast differentiation	5/130	111/18888	0.045045	6.5447	4.87738	0.00102318	0.0054668	0.00309548	NRAS/SHH/TNF/ACTB/MAPK14	5
BP	GO:0090277	positive regulation of peptide hormone secretion	5/130	111/18888	0.045045	6.5447	4.87738	0.00102318	0.0054668	0.00309548	ABAT/HIF1A/EGFR/JAK2/GCK	5
BP	GO:0120034	positive regulation of plasma membrane bounded cell projection assembly	5/130	111/18888	0.045045	6.5447	4.87738	0.00102318	0.0054668	0.00309548	HTT/HRAS/AGRN/KIT/P2RX7	5
BP	GO:0010573	vascular endothelial growth factor production	4/130	65/18888	0.0615385	8.94107	5.33889	0.00104847	0.00559243	0.00316661	ADGRG1/TNF/HIF1A/RORA	4
BP	GO:0022898	regulation of transmembrane transporter activity	7/130	229/18888	0.0305677	4.44125	4.36164	0.00105123	0.00559243	0.00316661	NOS1/HTT/ACTB/APP/GRM5/SLC6A9/CRHR1	7
BP	GO:0071241	cellular response to inorganic substance	7/130	229/18888	0.0305677	4.44125	4.36164	0.00105123	0.00559243	0.00316661	SHH/MAPK8/PARP1/EGFR/TSPO/SCN5A/LRRK2	7
BP	GO:0045453	bone resorption	4/130	66/18888	0.0606061	8.80559	5.28816	0.00111023	0.00588932	0.00333472	CTSK/EGFR/PRKCA/P2RX7	4
BP	GO:1901224	positive regulation of non-canonical NF-kappaB signal transduction	4/130	66/18888	0.0606061	8.80559	5.28816	0.00111023	0.00588932	0.00333472	TNF/APP/EGFR/VCP	4
BP	GO:1990845	adaptive thermogenesis	6/130	169/18888	0.035503	5.15831	4.52042	0.0011222	0.00594428	0.00336584	PRDM16/OGT/EHMT1/VEGFA/JAK2/OXTR	6
BP	GO:0060441	epithelial tube branching involved in lung morphogenesis	3/130	30/18888	0.1	14.5292	6.1737	0.00112907	0.00597209	0.00338158	SHH/KRAS/TNF	3
BP	GO:0019318	hexose metabolic process	7/130	232/18888	0.0301724	4.38382	4.3172	0.00113354	0.00598352	0.00338806	OGT/B4GALT1/TNF/RORA/MAPK14/MPI/GCK	7
BP	GO:0044772	mitotic cell cycle phase transition	10/130	451/18888	0.0221729	3.22156	3.97522	0.00113447	0.00598352	0.00338806	EZH2/KMT2E/ACTB/APP/RAD21/EGFR/CCND1/CDK4/CCND2/TERT	10
BP	GO:0030856	regulation of epithelial cell differentiation	6/130	171/18888	0.0350877	5.09798	4.48135	0.00119221	0.00627908	0.00355541	EZH2/KRAS/TNF/VEGFA/SMO/CCND1	6
BP	GO:0032355	response to estradiol	5/130	115/18888	0.0434783	6.31706	4.76117	0.00119879	0.00630473	0.00356994	EZH2/NCOR2/EGFR/CASP3/OXTR	5
BP	GO:0009267	cellular response to starvation	6/130	172/18888	0.0348837	5.06834	4.46205	0.00122845	0.00644923	0.00365175	HNRNPA1/MAPK8/GBA1/YWHAG/CTSK/LRRK2	6
BP	GO:0045936	negative regulation of phosphate metabolic process	9/130	378/18888	0.0238095	3.45934	4.02088	0.00122976	0.00644923	0.00365175	GBA1/YWHAG/TNF/PARP1/SMO/PRKCD/TSPO/ABL1/LRRK2	9
BP	GO:0006919	activation of cysteine-type endopeptidase activity involved in apoptotic process	4/130	68/18888	0.0588235	8.54661	5.18987	0.00124131	0.00645859	0.00365705	TNF/F2R/VCP/JAK2	4
BP	GO:0030808	regulation of nucleotide biosynthetic process	3/130	31/18888	0.0967742	14.0605	6.05851	0.00124379	0.00645859	0.00365705	NOS1/PARP1/VCP	3
BP	GO:0030878	thyroid gland development	3/130	31/18888	0.0967742	14.0605	6.05851	0.00124379	0.00645859	0.00365705	SHH/MAP2K1/RAF1	3
BP	GO:0035590	purinergic nucleotide receptor signaling pathway	3/130	31/18888	0.0967742	14.0605	6.05851	0.00124379	0.00645859	0.00365705	ADORA1/ADORA2A/P2RX7	3
BP	GO:0045745	positive regulation of G protein-coupled receptor signaling pathway	3/130	31/18888	0.0967742	14.0605	6.05851	0.00124379	0.00645859	0.00365705	NOS1/HIF1A/PRKCA	3
BP	GO:1900371	regulation of purine nucleotide biosynthetic process	3/130	31/18888	0.0967742	14.0605	6.05851	0.00124379	0.00645859	0.00365705	NOS1/PARP1/VCP	3
BP	GO:1902751	positive regulation of cell cycle G2/M phase transition	3/130	31/18888	0.0967742	14.0605	6.05851	0.00124379	0.00645859	0.00365705	APP/CCND1/CDK4	3
BP	GO:0010563	negative regulation of phosphorus metabolic process	9/130	379/18888	0.0237467	3.45021	4.01136	0.00125247	0.00649453	0.0036774	GBA1/YWHAG/TNF/PARP1/SMO/PRKCD/TSPO/ABL1/LRRK2	9
BP	GO:0051048	negative regulation of secretion	6/130	173/18888	0.0346821	5.03904	4.4429	0.00126552	0.00655301	0.00371052	ABAT/TNF/FGF23/F2R/ADORA1/TSPO	6
BP	GO:0048660	regulation of smooth muscle cell proliferation	6/130	174/18888	0.0344828	5.01008	4.42389	0.00130344	0.00673993	0.00381636	TNF/PDGFRB/ELANE/EGFR/JAK2/TERT	6
BP	GO:0043525	positive regulation of neuron apoptotic process	4/130	69/18888	0.057971	8.42274	5.14222	0.00131075	0.00675881	0.00382705	TNF/CASP3/HTR2A/ABL1	4
BP	GO:0048645	animal organ formation	4/130	69/18888	0.057971	8.42274	5.14222	0.00131075	0.00675881	0.00382705	SHH/FGFR1/AR/MAP2K1	4
BP	GO:0009743	response to carbohydrate	7/130	239/18888	0.0292887	4.25542	4.21637	0.00134533	0.00692744	0.00392254	OGT/NAGLU/TNF/HIF1A/CASP3/RAF1/GCK	7
BP	GO:0042445	hormone metabolic process	7/130	240/18888	0.0291667	4.23769	4.20228	0.00137796	0.00708555	0.00401206	SHH/NAGLU/ADM/CTSK/HIF1A/TSPO/CTSB	7
BP	GO:0032609	type II interferon production	5/130	119/18888	0.0420168	6.10472	4.65034	0.00139578	0.00715723	0.00405265	HRAS/TNF/JAK2/PDE4B/ABL1	5
BP	GO:0032649	regulation of type II interferon production	5/130	119/18888	0.0420168	6.10472	4.65034	0.00139578	0.00715723	0.00405265	HRAS/TNF/JAK2/PDE4B/ABL1	5
BP	GO:0034504	protein localization to nucleus	8/130	311/18888	0.0257235	3.73742	4.05223	0.00141344	0.00723773	0.00409823	SHH/PARP1/SMO/PRKCD/MAPK14/JAK2/TERT/LRRK2	8
BP	GO:0019933	cAMP-mediated signaling	4/130	71/18888	0.056338	8.18548	5.04975	0.0014577	0.00744374	0.00421488	ADM/PDE10A/PDE4A/PDE4B	4
BP	GO:0032091	negative regulation of protein binding	4/130	71/18888	0.056338	8.18548	5.04975	0.0014577	0.00744374	0.00421488	MAPK8/ACTB/PRKCD/LRRK2	4
BP	GO:0048659	smooth muscle cell proliferation	6/130	178/18888	0.0337079	4.89749	4.34929	0.0014639	0.00746508	0.00422696	TNF/PDGFRB/ELANE/EGFR/JAK2/TERT	6
BP	GO:0001975	response to amphetamine	3/130	33/18888	0.0909091	13.2084	5.84335	0.00149464	0.00756955	0.00428612	GRIN2A/ADORA2A/OXTR	3
BP	GO:0010464	regulation of mesenchymal cell proliferation	3/130	33/18888	0.0909091	13.2084	5.84335	0.00149464	0.00756955	0.00428612	SHH/FGFR1/SMO	3
BP	GO:0031069	hair follicle morphogenesis	3/130	33/18888	0.0909091	13.2084	5.84335	0.00149464	0.00756955	0.00428612	SHH/NAGLU/SMO	3
BP	GO:0060055	angiogenesis involved in wound healing	3/130	33/18888	0.0909091	13.2084	5.84335	0.00149464	0.00756955	0.00428612	B4GALT1/TNF/VEGFA	3
BP	GO:1903715	regulation of aerobic respiration	3/130	33/18888	0.0909091	13.2084	5.84335	0.00149464	0.00756955	0.00428612	TNF/HIF1A/VCP	3
BP	GO:2001234	negative regulation of apoptotic signaling pathway	7/130	244/18888	0.0286885	4.16822	4.14668	0.0015147	0.00766063	0.00433769	HTT/TNF/AR/HIF1A/RAF1/TERT/LRRK2	7
BP	GO:0010569	regulation of double-strand break repair via homologous recombination	4/130	72/18888	0.0555556	8.07179	5.00486	0.00153531	0.00774368	0.00438472	SETD2/ACTB/PARP1/ABL1	4
BP	GO:0042698	ovulation cycle	4/130	72/18888	0.0555556	8.07179	5.00486	0.00153531	0.00774368	0.00438472	NCOR2/EGFR/CASP3/OXTR	4
BP	GO:0035265	organ growth	6/130	180/18888	0.0333333	4.84308	4.31282	0.00154957	0.00780492	0.00441939	SHH/FGFR1/SMO/AR/MAPK14/ABL1	6
BP	GO:0030278	regulation of ossification	5/130	122/18888	0.0409836	5.9546	4.57049	0.00155847	0.00783904	0.00443871	SETD2/FGF23/HIF1A/MAPK14/P2RX7	5
BP	GO:0046631	alpha-beta T cell activation	6/130	181/18888	0.0331492	4.81632	4.29479	0.00159381	0.00799503	0.00452704	SHH/KMT2A/RORA/ADORA2A/JAK2/ABL1	6
BP	GO:0071478	cellular response to radiation	6/130	181/18888	0.0331492	4.81632	4.29479	0.00159381	0.00799503	0.00452704	CERS1/HRAS/PARP1/PRKCD/MAPK14/CCND2	6
BP	GO:0001838	embryonic epithelial tube formation	5/130	123/18888	0.0406504	5.90619	4.54446	0.00161567	0.00807223	0.00457075	SETD2/ADM/HIF1A/CASP3/ABL1	5
BP	GO:0030518	intracellular steroid hormone receptor signaling pathway	5/130	123/18888	0.0406504	5.90619	4.54446	0.00161567	0.00807223	0.00457075	KMT2D/NCOR2/PARP1/AR/JAK2	5
BP	GO:0033143	regulation of intracellular steroid hormone receptor signaling pathway	4/130	73/18888	0.0547945	7.96122	4.96083	0.00161576	0.00807223	0.00457075	KMT2D/NCOR2/PARP1/AR	4
BP	GO:0001782	B cell homeostasis	3/130	34/18888	0.0882353	12.8199	5.74264	0.00163109	0.00809405	0.00458311	HIF1A/CASP3/ABL1	3
BP	GO:0086004	regulation of cardiac muscle cell contraction	3/130	34/18888	0.0882353	12.8199	5.74264	0.00163109	0.00809405	0.00458311	ADORA1/PDE4B/SCN5A	3
BP	GO:0090183	regulation of kidney development	3/130	34/18888	0.0882353	12.8199	5.74264	0.00163109	0.00809405	0.00458311	EZH2/VEGFA/SMO	3
BP	GO:1901658	glycosyl compound catabolic process	3/130	34/18888	0.0882353	12.8199	5.74264	0.00163109	0.00809405	0.00458311	UPB1/GBA1/NAGA	3
BP	GO:1903725	regulation of phospholipid metabolic process	3/130	34/18888	0.0882353	12.8199	5.74264	0.00163109	0.00809405	0.00458311	PRKCD/HTR2C/HTR2A	3
BP	GO:0019827	stem cell population maintenance	6/130	182/18888	0.032967	4.78986	4.27689	0.001639	0.00812242	0.00459917	OGT/ACTB/CDH2/KIT/SMO/RAF1	6
BP	GO:0048738	cardiac muscle tissue development	7/130	248/18888	0.0282258	4.10099	4.09226	0.0016618	0.00822437	0.0046569	NAGLU/FGFR1/VEGFA/PDGFRB/MAPK14/SCN5A/ABL1	7
BP	GO:0043200	response to amino acid	5/130	124/18888	0.0403226	5.85856	4.51872	0.00167441	0.00827567	0.00468594	GRIN1/GRIN2D/TNF/EGFR/CASP3	5
BP	GO:0043534	blood vessel endothelial cell migration	6/130	183/18888	0.0327869	4.76368	4.25912	0.00168517	0.00831771	0.00470975	FGFR1/TNF/VEGFA/HIF1A/PRKCA/ABL1	6
BP	GO:0070527	platelet aggregation	4/130	74/18888	0.0540541	7.85364	4.91764	0.00169909	0.00836983	0.00473926	ACTB/PRKCD/PRKCA/JAK2	4
BP	GO:0060047	heart contraction	7/130	249/18888	0.0281124	4.08452	4.07884	0.00170026	0.00836983	0.00473926	NOS1/ADM/TNF/SCN4A/ADORA1/PDE4B/SCN5A	7
BP	GO:0002065	columnar/cuboidal epithelial cell differentiation	5/130	125/18888	0.04	5.81169	4.49326	0.0017347	0.00850533	0.00481598	POU3F2/CDH2/SMO/HIF1A/ABL1	5
BP	GO:0022612	gland morphogenesis	5/130	125/18888	0.04	5.81169	4.49326	0.0017347	0.00850533	0.00481598	SHH/FGFR1/TNF/AR/EGFR	5
BP	GO:0032434	regulation of proteasomal ubiquitin-dependent protein catabolic process	5/130	125/18888	0.04	5.81169	4.49326	0.0017347	0.00850533	0.00481598	OGT/SHH/GBA1/VCP/LRRK2	5
BP	GO:0001893	maternal placenta development	3/130	35/18888	0.0857143	12.4536	5.64608	0.00177509	0.00863455	0.00488915	ASH1L/PARP1/CTSB	3
BP	GO:0008340	determination of adult lifespan	3/130	35/18888	0.0857143	12.4536	5.64608	0.00177509	0.00863455	0.00488915	NAGLU/GBA1/LRRK2	3
BP	GO:0033146	regulation of intracellular estrogen receptor signaling pathway	3/130	35/18888	0.0857143	12.4536	5.64608	0.00177509	0.00863455	0.00488915	KMT2D/PARP1/AR	3
BP	GO:0034110	regulation of homotypic cell-cell adhesion	3/130	35/18888	0.0857143	12.4536	5.64608	0.00177509	0.00863455	0.00488915	PRKCD/PRKCA/JAK2	3
BP	GO:0050974	detection of mechanical stimulus involved in sensory perception	3/130	35/18888	0.0857143	12.4536	5.64608	0.00177509	0.00863455	0.00488915	TNF/KIT/HTR2A	3
BP	GO:0099171	presynaptic modulation of chemical synaptic transmission	3/130	35/18888	0.0857143	12.4536	5.64608	0.00177509	0.00863455	0.00488915	GRIN3A/ADORA2A/HTR2A	3
BP	GO:0005996	monosaccharide metabolic process	7/130	252/18888	0.0277778	4.0359	4.03897	0.00181981	0.00884045	0.00500574	OGT/B4GALT1/TNF/RORA/MAPK14/MPI/GCK	7
BP	GO:1905952	regulation of lipid localization	6/130	186/18888	0.0322581	4.68685	4.20657	0.00182961	0.00887637	0.00502608	SHH/TNF/PRKCD/TSPO/P2RX7/CRHR1	6
BP	GO:0003014	renal system process	5/130	127/18888	0.0393701	5.72017	4.44315	0.00186004	0.00901215	0.00510297	ADM/F2R/ABCG2/ADORA1/ADORA2A	5
BP	GO:0002260	lymphocyte homeostasis	4/130	76/18888	0.0526316	7.64696	4.83362	0.00187462	0.00905904	0.00512951	HIF1A/CASP3/P2RX7/ABL1	4
BP	GO:0035924	cellular response to vascular endothelial growth factor stimulus	4/130	76/18888	0.0526316	7.64696	4.83362	0.00187462	0.00905904	0.00512951	VEGFA/FLT1/PDGFRB/MAPK14	4
BP	GO:1903131	mononuclear cell differentiation	10/130	484/18888	0.0206612	3.00191	3.71424	0.00191388	0.00923667	0.00523009	SHH/EZH2/KMT2A/GBA1/ACTB/VEGFA/KIT/CTSK/RORA/ABL1	10
BP	GO:0001569	branching involved in blood vessel morphogenesis	3/130	36/18888	0.0833333	12.1077	5.55337	0.00192679	0.00926263	0.00524479	SHH/VEGFA/ABL1	3
BP	GO:0002068	glandular epithelial cell development	3/130	36/18888	0.0833333	12.1077	5.55337	0.00192679	0.00926263	0.00524479	CDH2/SMO/HIF1A	3
BP	GO:0042462	eye photoreceptor cell development	3/130	36/18888	0.0833333	12.1077	5.55337	0.00192679	0.00926263	0.00524479	NAGLU/VEGFA/RORB	3
BP	GO:0048771	tissue remodeling	6/130	188/18888	0.0319149	4.63699	4.17215	0.001931	0.00927079	0.00524941	F2R/CTSK/HIF1A/EGFR/PRKCA/P2RX7	6
BP	GO:0045913	positive regulation of carbohydrate metabolic process	4/130	77/18888	0.0519481	7.54765	4.79275	0.00196693	0.00941882	0.00533323	APP/HTR2A/P2RX7/GCK	4
BP	GO:0055117	regulation of cardiac muscle contraction	4/130	77/18888	0.0519481	7.54765	4.79275	0.00196693	0.00941882	0.00533323	NOS1/ADORA1/PDE4B/SCN5A	4
BP	GO:0045786	negative regulation of cell cycle	9/130	405/18888	0.0222222	3.22872	3.77447	0.00197279	0.00943465	0.0053422	EZH2/NAA10/TNF/RAD21/EGFR/CASP3/MAPK14/CCND1/ABL1	9
BP	GO:0003140	determination of left/right asymmetry in lateral mesoderm	2/130	10/18888	0.2	29.0585	7.38832	0.00204029	0.00963267	0.00545432	SHH/SMO	2
BP	GO:0038129	ERBB3 signaling pathway	2/130	10/18888	0.2	29.0585	7.38832	0.00204029	0.00963267	0.00545432	MAP2K1/RAF1	2
BP	GO:0046548	retinal rod cell development	2/130	10/18888	0.2	29.0585	7.38832	0.00204029	0.00963267	0.00545432	NAGLU/RORB	2
BP	GO:0051124	synaptic assembly at neuromuscular junction	2/130	10/18888	0.2	29.0585	7.38832	0.00204029	0.00963267	0.00545432	AGRN/APP	2
BP	GO:0060245	detection of cell density	2/130	10/18888	0.2	29.0585	7.38832	0.00204029	0.00963267	0.00545432	SMO/TSPO	2
BP	GO:0060768	regulation of epithelial cell proliferation involved in prostate gland development	2/130	10/18888	0.2	29.0585	7.38832	0.00204029	0.00963267	0.00545432	SHH/AR	2
BP	GO:0071073	positive regulation of phospholipid biosynthetic process	2/130	10/18888	0.2	29.0585	7.38832	0.00204029	0.00963267	0.00545432	HTR2C/HTR2A	2
BP	GO:0072203	cell proliferation involved in metanephros development	2/130	10/18888	0.2	29.0585	7.38832	0.00204029	0.00963267	0.00545432	SHH/PDGFRB	2
BP	GO:1904383	response to sodium phosphate	2/130	10/18888	0.2	29.0585	7.38832	0.00204029	0.00963267	0.00545432	FGFR1/FGF23	2
BP	GO:2000849	regulation of glucocorticoid secretion	2/130	10/18888	0.2	29.0585	7.38832	0.00204029	0.00963267	0.00545432	TSPO/CRHR1	2
BP	GO:0000079	regulation of cyclin-dependent protein serine/threonine kinase activity	4/130	78/18888	0.0512821	7.45089	4.75261	0.00206234	0.00969957	0.0054922	ACTB/EGFR/CCND1/CCND2	4
BP	GO:0051101	regulation of DNA binding	4/130	78/18888	0.0512821	7.45089	4.75261	0.00206234	0.00969957	0.0054922	MAPK8/NSD1/SMO/JAK2	4
BP	GO:0051145	smooth muscle cell differentiation	4/130	78/18888	0.0512821	7.45089	4.75261	0.00206234	0.00969957	0.0054922	SHH/ADM/VEGFA/KIT	4
BP	GO:0009225	nucleotide-sugar metabolic process	3/130	37/18888	0.0810811	11.7805	5.46425	0.00208633	0.00976264	0.00552791	DPAGT1/GNE/MPI	3
BP	GO:0046677	response to antibiotic	3/130	37/18888	0.0810811	11.7805	5.46425	0.00208633	0.00976264	0.00552791	EZH2/EHMT1/JAK2	3
BP	GO:0048730	epidermis morphogenesis	3/130	37/18888	0.0810811	11.7805	5.46425	0.00208633	0.00976264	0.00552791	SHH/NAGLU/SMO	3
BP	GO:0070269	pyroptosis	3/130	37/18888	0.0810811	11.7805	5.46425	0.00208633	0.00976264	0.00552791	ELANE/CASP3/CASP1	3
BP	GO:0006941	striated muscle contraction	6/130	191/18888	0.0314136	4.56416	4.12142	0.00209099	0.00977205	0.00553324	NOS1/TNF/SCN4A/ADORA1/PDE4B/SCN5A	6
BP	GO:0010595	positive regulation of endothelial cell migration	5/130	131/18888	0.0381679	5.54551	4.34607	0.00213044	0.00994386	0.00563053	FGFR1/VEGFA/HIF1A/PRKCA/ABL1	5
BP	GO:0071897	DNA biosynthetic process	6/130	192/18888	0.03125	4.54038	4.10475	0.00214648	0.0100061	0.00566575	CERS1/HNRNPA1/TNF/PDGFRB/VCP/TERT	6
BP	GO:0006913	nucleocytoplasmic transport	8/130	333/18888	0.024024	3.49051	3.81715	0.00216774	0.0100797	0.00570746	SHH/HNRNPA1/SETD2/SMO/PRKCD/MAPK14/JAK2/LRRK2	8
BP	GO:0051169	nuclear transport	8/130	333/18888	0.024024	3.49051	3.81715	0.00216774	0.0100797	0.00570746	SHH/HNRNPA1/SETD2/SMO/PRKCD/MAPK14/JAK2/LRRK2	8
BP	GO:0003015	heart process	7/130	260/18888	0.0269231	3.91172	3.93561	0.0021707	0.0100808	0.00570805	NOS1/ADM/TNF/SCN4A/ADORA1/PDE4B/SCN5A	7
BP	GO:0000018	regulation of DNA recombination	5/130	132/18888	0.0378788	5.5035	4.32242	0.0022023	0.0102019	0.00577662	NSD2/SETD2/ACTB/PARP1/ABL1	5
BP	GO:2000779	regulation of double-strand break repair	5/130	132/18888	0.0378788	5.5035	4.32242	0.0022023	0.0102019	0.00577662	NSD2/SETD2/ACTB/PARP1/ABL1	5
BP	GO:0035633	maintenance of blood-brain barrier	3/130	38/18888	0.0789474	11.4704	5.3785	0.00225385	0.0104145	0.00589704	NAGLU/ACTB/VEGFA	3
BP	GO:0048854	brain morphogenesis	3/130	38/18888	0.0789474	11.4704	5.3785	0.00225385	0.0104145	0.00589704	GBA1/CDH2/SMO	3
BP	GO:0002534	cytokine production involved in inflammatory response	4/130	80/18888	0.05	7.26462	4.67442	0.00226266	0.0104162	0.00589795	EZH2/TNF/HIF1A/MAPK14	4
BP	GO:0014032	neural crest cell development	4/130	80/18888	0.05	7.26462	4.67442	0.00226266	0.0104162	0.00589795	SHH/CDH2/SMO/HIF1A	4
BP	GO:1900015	regulation of cytokine production involved in inflammatory response	4/130	80/18888	0.05	7.26462	4.67442	0.00226266	0.0104162	0.00589795	EZH2/TNF/HIF1A/MAPK14	4
BP	GO:0042476	odontogenesis	5/130	133/18888	0.037594	5.46212	4.29901	0.00227591	0.0104641	0.00592508	SHH/FGFR1/ADM/SMO/SCN5A	5
BP	GO:0001667	ameboidal-type cell migration	10/130	498/18888	0.0200803	2.91752	3.61013	0.00235453	0.0108121	0.00612214	SHH/FGFR1/TNF/CDH2/VEGFA/KIT/SMO/HIF1A/PRKCA/ABL1	10
BP	GO:0006970	response to osmotic stress	4/130	81/18888	0.0493827	7.17493	4.63633	0.00236768	0.0108187	0.00612587	TNF/CASP3/CASP1/TSPO	4
BP	GO:0008344	adult locomotory behavior	4/130	81/18888	0.0493827	7.17493	4.63633	0.00236768	0.0108187	0.00612587	GRIN2D/HEXA/APP/CCND2	4
BP	GO:0050810	regulation of steroid biosynthetic process	4/130	81/18888	0.0493827	7.17493	4.63633	0.00236768	0.0108187	0.00612587	ASAH1/ADM/TNF/TSPO	4
BP	GO:1904029	regulation of cyclin-dependent protein kinase activity	4/130	81/18888	0.0493827	7.17493	4.63633	0.00236768	0.0108187	0.00612587	ACTB/EGFR/CCND1/CCND2	4
BP	GO:0072175	epithelial tube formation	5/130	135/18888	0.037037	5.3812	4.25289	0.00242848	0.0110692	0.00626771	SETD2/ADM/HIF1A/CASP3/ABL1	5
BP	GO:0051349	positive regulation of lyase activity	3/130	39/18888	0.0769231	11.1763	5.29589	0.00242949	0.0110692	0.00626771	NOS1/RAF1/CRHR1	3
BP	GO:0002520	immune system development	6/130	197/18888	0.0304569	4.42515	4.02305	0.00244083	0.0110692	0.00626771	NSD2/SHH/KMT2A/MAP2K1/RAF1/ABL1	6
BP	GO:0032147	activation of protein kinase activity	4/130	82/18888	0.0487805	7.08743	4.59889	0.00247601	0.0110692	0.00626771	VEGFA/PRKCD/JAK2/ABL1	4
BP	GO:0001973	G protein-coupled adenosine receptor signaling pathway	2/130	11/18888	0.181818	26.4168	7.01957	0.00248247	0.0110692	0.00626771	ADORA1/ADORA2A	2
BP	GO:0002327	immature B cell differentiation	2/130	11/18888	0.181818	26.4168	7.01957	0.00248247	0.0110692	0.00626771	KIT/ABL1	2
BP	GO:0006678	glucosylceramide metabolic process	2/130	11/18888	0.181818	26.4168	7.01957	0.00248247	0.0110692	0.00626771	GBA1/PRKCD	2
BP	GO:0014049	positive regulation of glutamate secretion	2/130	11/18888	0.181818	26.4168	7.01957	0.00248247	0.0110692	0.00626771	ADORA2A/P2RX7	2
BP	GO:0031650	regulation of heat generation	2/130	11/18888	0.181818	26.4168	7.01957	0.00248247	0.0110692	0.00626771	ABAT/TNF	2
BP	GO:0034776	response to histamine	2/130	11/18888	0.181818	26.4168	7.01957	0.00248247	0.0110692	0.00626771	GABRB3/GABRG2	2
BP	GO:0035588	G protein-coupled purinergic receptor signaling pathway	2/130	11/18888	0.181818	26.4168	7.01957	0.00248247	0.0110692	0.00626771	ADORA1/ADORA2A	2
BP	GO:0046477	glycosylceramide catabolic process	2/130	11/18888	0.181818	26.4168	7.01957	0.00248247	0.0110692	0.00626771	GBA1/PRKCD	2
BP	GO:0060439	trachea morphogenesis	2/130	11/18888	0.181818	26.4168	7.01957	0.00248247	0.0110692	0.00626771	SHH/MAP2K1	2
BP	GO:0060601	lateral sprouting from an epithelium	2/130	11/18888	0.181818	26.4168	7.01957	0.00248247	0.0110692	0.00626771	SHH/AR	2
BP	GO:0060736	prostate gland growth	2/130	11/18888	0.181818	26.4168	7.01957	0.00248247	0.0110692	0.00626771	SHH/AR	2
BP	GO:0060767	epithelial cell proliferation involved in prostate gland development	2/130	11/18888	0.181818	26.4168	7.01957	0.00248247	0.0110692	0.00626771	SHH/AR	2
BP	GO:0062100	positive regulation of programmed necrotic cell death	2/130	11/18888	0.181818	26.4168	7.01957	0.00248247	0.0110692	0.00626771	PARP1/TSPO	2
BP	GO:0098696	regulation of neurotransmitter receptor localization to postsynaptic specialization membrane	2/130	11/18888	0.181818	26.4168	7.01957	0.00248247	0.0110692	0.00626771	OGT/HRAS	2
BP	GO:0099550	trans-synaptic signaling, modulating synaptic transmission	2/130	11/18888	0.181818	26.4168	7.01957	0.00248247	0.0110692	0.00626771	F2R/GRM5	2
BP	GO:2001054	negative regulation of mesenchymal cell apoptotic process	2/130	11/18888	0.181818	26.4168	7.01957	0.00248247	0.0110692	0.00626771	SHH/HIF1A	2
BP	GO:0051279	regulation of release of sequestered calcium ion into cytosol	4/130	83/18888	0.0481928	7.00204	4.56206	0.0025877	0.0115106	0.00651766	NOS1/HTT/F2R/ABL1	4
BP	GO:0086003	cardiac muscle cell contraction	4/130	83/18888	0.0481928	7.00204	4.56206	0.0025877	0.0115106	0.00651766	SCN4A/ADORA1/PDE4B/SCN5A	4
BP	GO:0035886	vascular associated smooth muscle cell differentiation	3/130	40/18888	0.075	10.8969	5.21624	0.00261337	0.0115968	0.00656649	ADM/VEGFA/KIT	3
BP	GO:1903115	regulation of actin filament-based movement	3/130	40/18888	0.075	10.8969	5.21624	0.00261337	0.0115968	0.00656649	ADORA1/PDE4B/SCN5A	3
BP	GO:0048762	mesenchymal cell differentiation	7/130	269/18888	0.0260223	3.78084	3.82414	0.00262569	0.0116375	0.00658952	SHH/EZH2/FGFR1/NCAM1/CDH2/SMO/HIF1A	7
BP	GO:0030073	insulin secretion	6/130	200/18888	0.03	4.35877	3.97533	0.00263144	0.011649	0.00659604	ABAT/TNF/HIF1A/JAK2/RAF1/GCK	6
BP	GO:0010212	response to ionizing radiation	5/130	138/18888	0.0362319	5.26421	4.18541	0.00267109	0.0118104	0.00668741	HRAS/PARP1/CASP3/MAPK14/CCND2	5
BP	GO:0071695	anatomical structure maturation	7/130	271/18888	0.0258303	3.75294	3.80002	0.00273608	0.0120833	0.00684193	FGFR1/AGRN/GBA1/APP/VEGFA/HIF1A/LRRK2	7
BP	GO:0043010	camera-type eye development	8/130	346/18888	0.0231214	3.35936	3.68735	0.00274387	0.0121032	0.00685321	SHH/NAGLU/VEGFA/FLT1/PDGFRB/HIF1A/EGFR/RORB	8
BP	GO:0043401	steroid hormone mediated signaling pathway	5/130	139/18888	0.0359712	5.22634	4.16335	0.00275574	0.012141	0.00687463	KMT2D/NCOR2/PARP1/AR/JAK2	5
BP	GO:0031400	negative regulation of protein modification process	9/130	426/18888	0.0211268	3.06956	3.59669	0.0027694	0.0121867	0.00690047	OGT/GBA1/YWHAG/TNF/SMO/PRKCD/TSPO/ABL1/LRRK2	9
BP	GO:0051281	positive regulation of release of sequestered calcium ion into cytosol	3/130	41/18888	0.0731707	10.6311	5.13935	0.00280563	0.0123314	0.00698242	HTT/F2R/ABL1	3
BP	GO:0008589	regulation of smoothened signaling pathway	4/130	85/18888	0.0470588	6.83729	4.49021	0.00282137	0.0123858	0.00701325	SHH/SMO/RORA/VCP	4
BP	GO:0009581	detection of external stimulus	5/130	140/18888	0.0357143	5.18901	4.1415	0.00284231	0.0124482	0.00704853	TNF/CDH2/KIT/ADORA1/HTR2A	5
BP	GO:0032388	positive regulation of intracellular transport	5/130	140/18888	0.0357143	5.18901	4.1415	0.00284231	0.0124482	0.00704853	SHH/SMO/PRKCD/MAPK14/JAK2	5
BP	GO:0120032	regulation of plasma membrane bounded cell projection assembly	6/130	204/18888	0.0294118	4.2733	3.91315	0.00290273	0.0126977	0.00718986	HTT/HRAS/AGRN/KIT/PRKCD/P2RX7	6
BP	GO:0070828	heterochromatin organization	5/130	141/18888	0.035461	5.15221	4.11986	0.00293083	0.0127907	0.00724252	KMT2D/PRDM16/EZH2/EHMT1/KMT2A	5
BP	GO:0032024	positive regulation of insulin secretion	4/130	86/18888	0.0465116	6.75778	4.45515	0.00294345	0.0127907	0.00724252	ABAT/HIF1A/JAK2/GCK	4
BP	GO:0001967	suckling behavior	2/130	12/18888	0.166667	24.2154	6.69686	0.00296557	0.0127907	0.00724252	APP/OXTR	2
BP	GO:0002551	mast cell chemotaxis	2/130	12/18888	0.166667	24.2154	6.69686	0.00296557	0.0127907	0.00724252	VEGFA/KIT	2
BP	GO:0002674	negative regulation of acute inflammatory response	2/130	12/18888	0.166667	24.2154	6.69686	0.00296557	0.0127907	0.00724252	ASH1L/ADORA1	2
BP	GO:0007494	midgut development	2/130	12/18888	0.166667	24.2154	6.69686	0.00296557	0.0127907	0.00724252	SMO/EGFR	2
BP	GO:0010749	regulation of nitric oxide mediated signal transduction	2/130	12/18888	0.166667	24.2154	6.69686	0.00296557	0.0127907	0.00724252	VEGFA/EGFR	2
BP	GO:0014051	gamma-aminobutyric acid secretion	2/130	12/18888	0.166667	24.2154	6.69686	0.00296557	0.0127907	0.00724252	ABAT/P2RX7	2
BP	GO:0035933	glucocorticoid secretion	2/130	12/18888	0.166667	24.2154	6.69686	0.00296557	0.0127907	0.00724252	TSPO/CRHR1	2
BP	GO:0050655	dermatan sulfate proteoglycan metabolic process	2/130	12/18888	0.166667	24.2154	6.69686	0.00296557	0.0127907	0.00724252	HEXA/HEXB	2
BP	GO:0097084	vascular associated smooth muscle cell development	2/130	12/18888	0.166667	24.2154	6.69686	0.00296557	0.0127907	0.00724252	ADM/VEGFA	2
BP	GO:0099004	calmodulin dependent kinase signaling pathway	2/130	12/18888	0.166667	24.2154	6.69686	0.00296557	0.0127907	0.00724252	HTT/LRRK2	2
BP	GO:0042119	neutrophil activation	3/130	42/18888	0.0714286	10.378	5.06508	0.00300638	0.0129365	0.00732508	KMT2E/TNF/PRKCD	3
BP	GO:0060563	neuroepithelial cell differentiation	3/130	42/18888	0.0714286	10.378	5.06508	0.00300638	0.0129365	0.00732508	POU3F2/CDH2/ABL1	3
BP	GO:0016051	carbohydrate biosynthetic process	6/130	206/18888	0.0291262	4.23181	3.88265	0.00304598	0.0130665	0.00739867	OGT/MGAT2/ST3GAL3/B4GALT1/PARP1/GCK	6
BP	GO:0060491	regulation of cell projection assembly	6/130	206/18888	0.0291262	4.23181	3.88265	0.00304598	0.0130665	0.00739867	HTT/HRAS/AGRN/KIT/PRKCD/P2RX7	6
BP	GO:0070661	leukocyte proliferation	8/130	352/18888	0.0227273	3.3021	3.6295	0.0030472	0.0130665	0.00739867	SHH/GBA1/KIT/PRKCD/CASP3/JAK2/P2RX7/ABL1	8
BP	GO:0045765	regulation of angiogenesis	8/130	353/18888	0.0226629	3.29274	3.61998	0.0031002	0.0132784	0.00751862	ADM/TNF/VEGFA/FLT1/HIF1A/PRKCA/TERT/ABL1	8
BP	GO:0009582	detection of abiotic stimulus	5/130	143/18888	0.034965	5.08015	4.07719	0.00311383	0.0133058	0.00753418	TNF/CDH2/KIT/ADORA1/HTR2A	5
BP	GO:2001235	positive regulation of apoptotic signaling pathway	5/130	143/18888	0.034965	5.08015	4.07719	0.00311383	0.0133058	0.00753418	TNF/PRKCD/CTSK/ADORA2A/JAK2	5
BP	GO:0008016	regulation of heart contraction	6/130	208/18888	0.0288462	4.19112	3.85254	0.00319446	0.0136032	0.00770254	NOS1/ADM/TNF/ADORA1/PDE4B/SCN5A	6
BP	GO:0009746	response to hexose	6/130	208/18888	0.0288462	4.19112	3.85254	0.00319446	0.0136032	0.00770254	OGT/TNF/HIF1A/CASP3/RAF1/GCK	6
BP	GO:0043123	positive regulation of canonical NF-kappaB signal transduction	6/130	208/18888	0.0288462	4.19112	3.85254	0.00319446	0.0136032	0.00770254	TNF/VEGFA/PARP1/F2R/CASP1/ABL1	6
BP	GO:0016266	O-glycan processing	3/130	43/18888	0.0697674	10.1367	4.99326	0.00321575	0.0136623	0.00773603	ST3GAL3/GALNT2/POMGNT1	3
BP	GO:0045124	regulation of bone resorption	3/130	43/18888	0.0697674	10.1367	4.99326	0.00321575	0.0136623	0.00773603	EGFR/PRKCA/P2RX7	3
BP	GO:1990778	protein localization to cell periphery	8/130	356/18888	0.0224719	3.265	3.59163	0.00326353	0.0138494	0.00784195	OGT/HRAS/TNF/ACTB/CDH2/GRIN2A/AR/EGFR	8
BP	GO:0007266	Rho protein signal transduction	5/130	145/18888	0.0344828	5.01008	4.03531	0.00330493	0.0139929	0.00792322	ADGRG1/F2R/RAF1/ABL1/LRRK2	5
BP	GO:0060048	cardiac muscle contraction	5/130	145/18888	0.0344828	5.01008	4.03531	0.00330493	0.0139929	0.00792322	NOS1/SCN4A/ADORA1/PDE4B/SCN5A	5
BP	GO:0001843	neural tube closure	4/130	89/18888	0.0449438	6.52999	4.35323	0.00333127	0.0140561	0.00795899	SETD2/ADM/CASP3/ABL1	4
BP	GO:0035023	regulation of Rho protein signal transduction	4/130	89/18888	0.0449438	6.52999	4.35323	0.00333127	0.0140561	0.00795899	ADGRG1/F2R/RAF1/ABL1	4
BP	GO:2000243	positive regulation of reproductive process	4/130	89/18888	0.0449438	6.52999	4.35323	0.00333127	0.0140561	0.00795899	SHH/VEGFA/AR/OXTR	4
BP	GO:0006470	protein dephosphorylation	6/130	210/18888	0.0285714	4.15121	3.8228	0.00334827	0.0141117	0.00799048	HTT/GBA1/TNF/PDGFRB/PRKCD/ADORA1	6
BP	GO:0046717	acid secretion	3/130	44/18888	0.0681818	9.90629	4.92376	0.00343386	0.014423	0.00816674	ABAT/TNF/P2RX7	3
BP	GO:0071548	response to dexamethasone	3/130	44/18888	0.0681818	9.90629	4.92376	0.00343386	0.014423	0.00816674	GBA1/EGFR/JAK2	3
BP	GO:1903539	protein localization to postsynaptic membrane	3/130	44/18888	0.0681818	9.90629	4.92376	0.00343386	0.014423	0.00816674	OGT/HRAS/GRIN2A	3
BP	GO:0034644	cellular response to UV	4/130	90/18888	0.0444444	6.45744	4.3203	0.00346791	0.0145165	0.00821968	CERS1/PARP1/PRKCD/MAPK14	4
BP	GO:0046849	bone remodeling	4/130	90/18888	0.0444444	6.45744	4.3203	0.00346791	0.0145165	0.00821968	CTSK/EGFR/PRKCA/P2RX7	4
BP	GO:0060606	tube closure	4/130	90/18888	0.0444444	6.45744	4.3203	0.00346791	0.0145165	0.00821968	SETD2/ADM/CASP3/ABL1	4
BP	GO:0010524	positive regulation of calcium ion transport into cytosol	2/130	13/18888	0.153846	22.3527	6.41121	0.00348901	0.014517	0.00822	GRIN1/P2RX7	2
BP	GO:0014061	regulation of norepinephrine secretion	2/130	13/18888	0.153846	22.3527	6.41121	0.00348901	0.014517	0.00822	ADORA2A/OXTR	2
BP	GO:0021794	thalamus development	2/130	13/18888	0.153846	22.3527	6.41121	0.00348901	0.014517	0.00822	SHH/SMO	2
BP	GO:0021978	telencephalon regionalization	2/130	13/18888	0.153846	22.3527	6.41121	0.00348901	0.014517	0.00822	SHH/ADGRG1	2
BP	GO:0060134	prepulse inhibition	2/130	13/18888	0.153846	22.3527	6.41121	0.00348901	0.014517	0.00822	GRIN3A/ADORA2A	2
BP	GO:0002768	immune response-regulating cell surface receptor signaling pathway	8/130	360/18888	0.0222222	3.22872	3.55428	0.00349164	0.014517	0.00822	MAPK8/NAGLU/HRAS/MAPK10/KIT/PRKCD/PDE4B/ABL1	8
BP	GO:1904019	epithelial cell apoptotic process	5/130	147/18888	0.0340136	4.94192	3.9942	0.00350435	0.0145535	0.00824065	TNF/CASP3/JAK2/TERT/ABL1	5
BP	GO:0045216	cell-cell junction organization	6/130	213/18888	0.028169	4.09274	3.77888	0.00358927	0.0148727	0.0084214	TNF/ACTB/CDH2/VEGFA/F2R/PRKCA	6
BP	GO:0071383	cellular response to steroid hormone stimulus	6/130	213/18888	0.028169	4.09274	3.77888	0.00358927	0.0148727	0.0084214	KMT2D/NCOR2/PARP1/AR/EGFR/JAK2	6
BP	GO:1903510	mucopolysaccharide metabolic process	4/130	91/18888	0.043956	6.38648	4.28786	0.00360831	0.0149094	0.00844217	ST3GAL3/NAGLU/HEXA/HEXB	4
BP	GO:0042176	regulation of protein catabolic process	8/130	362/18888	0.0220994	3.21088	3.53581	0.00361024	0.0149094	0.00844217	OGT/SHH/GBA1/TNF/GRIN2A/EGFR/VCP/LRRK2	8
BP	GO:1901342	regulation of vasculature development	8/130	362/18888	0.0220994	3.21088	3.53581	0.00361024	0.0149094	0.00844217	ADM/TNF/VEGFA/FLT1/HIF1A/PRKCA/TERT/ABL1	8
BP	GO:0010463	mesenchymal cell proliferation	3/130	45/18888	0.0666667	9.68615	4.85645	0.00366081	0.0150509	0.00852229	SHH/FGFR1/SMO	3
BP	GO:0033574	response to testosterone	3/130	45/18888	0.0666667	9.68615	4.85645	0.00366081	0.0150509	0.00852229	GBA1/AR/TSPO	3
BP	GO:0060428	lung epithelium development	3/130	45/18888	0.0666667	9.68615	4.85645	0.00366081	0.0150509	0.00852229	SHH/KRAS/MAP2K1	3
BP	GO:0062237	protein localization to postsynapse	3/130	45/18888	0.0666667	9.68615	4.85645	0.00366081	0.0150509	0.00852229	OGT/HRAS/GRIN2A	3
BP	GO:2000241	regulation of reproductive process	6/130	214/18888	0.0280374	4.07362	3.76442	0.0036724	0.0150818	0.00853977	SHH/B4GALT1/VEGFA/KIT/AR/OXTR	6
BP	GO:0043122	regulation of canonical NF-kappaB signal transduction	7/130	286/18888	0.0244755	3.55611	3.62612	0.00368189	0.0151039	0.00855232	TNF/VEGFA/PARP1/F2R/RORA/CASP1/ABL1	7
BP	GO:0010821	regulation of mitochondrion organization	5/130	149/18888	0.033557	4.87558	3.95382	0.00371228	0.0151948	0.00860379	CERS1/HTT/HIF1A/TSPO/LRRK2	5
BP	GO:0033157	regulation of intracellular protein transport	5/130	149/18888	0.033557	4.87558	3.95382	0.00371228	0.0151948	0.00860379	SHH/SMO/PRKCD/MAPK14/JAK2	5
BP	GO:0006282	regulation of DNA repair	6/130	215/18888	0.027907	4.05467	3.75004	0.00375695	0.0153437	0.00868806	NSD2/SETD2/ACTB/PARP1/EGFR/ABL1	6
BP	GO:0034284	response to monosaccharide	6/130	215/18888	0.027907	4.05467	3.75004	0.00375695	0.0153437	0.00868806	OGT/TNF/HIF1A/CASP3/RAF1/GCK	6
BP	GO:0032892	positive regulation of organic acid transport	3/130	46/18888	0.0652174	9.47559	4.79121	0.00389671	0.0158427	0.00897065	ABAT/ADORA2A/P2RX7	3
BP	GO:2001239	regulation of extrinsic apoptotic signaling pathway in absence of ligand	3/130	46/18888	0.0652174	9.47559	4.79121	0.00389671	0.0158427	0.00897065	FGFR1/TNF/TERT	3
BP	GO:0014033	neural crest cell differentiation	4/130	93/18888	0.0430108	6.24913	4.22443	0.00390061	0.0158427	0.00897065	SHH/CDH2/SMO/HIF1A	4
BP	GO:0042475	odontogenesis of dentin-containing tooth	4/130	93/18888	0.0430108	6.24913	4.22443	0.00390061	0.0158427	0.00897065	SHH/ADM/SMO/SCN5A	4
BP	GO:2001251	negative regulation of chromosome organization	4/130	93/18888	0.0430108	6.24913	4.22443	0.00390061	0.0158427	0.00897065	HNRNPA1/NAA10/PARP1/RAD21	4
BP	GO:0010508	positive regulation of autophagy	5/130	152/18888	0.0328947	4.77935	3.89458	0.00404057	0.0161404	0.00913922	CERS1/HTT/SETD2/HIF1A/LRRK2	5
BP	GO:1903531	negative regulation of secretion by cell	5/130	152/18888	0.0328947	4.77935	3.89458	0.00404057	0.0161404	0.00913922	ABAT/FGF23/F2R/ADORA1/TSPO	5
BP	GO:0001977	renal system process involved in regulation of blood volume	2/130	14/18888	0.142857	20.756	6.15591	0.00405223	0.0161404	0.00913922	F2R/ADORA1	2
BP	GO:0006047	UDP-N-acetylglucosamine metabolic process	2/130	14/18888	0.142857	20.756	6.15591	0.00405223	0.0161404	0.00913922	DPAGT1/GNE	2
BP	GO:0021534	cell proliferation in hindbrain	2/130	14/18888	0.142857	20.756	6.15591	0.00405223	0.0161404	0.00913922	SHH/RORA	2
BP	GO:0021924	cell proliferation in external granule layer	2/130	14/18888	0.142857	20.756	6.15591	0.00405223	0.0161404	0.00913922	SHH/RORA	2
BP	GO:0021930	cerebellar granule cell precursor proliferation	2/130	14/18888	0.142857	20.756	6.15591	0.00405223	0.0161404	0.00913922	SHH/RORA	2
BP	GO:0032621	interleukin-18 production	2/130	14/18888	0.142857	20.756	6.15591	0.00405223	0.0161404	0.00913922	TNF/CASP1	2
BP	GO:0032661	regulation of interleukin-18 production	2/130	14/18888	0.142857	20.756	6.15591	0.00405223	0.0161404	0.00913922	TNF/CASP1	2
BP	GO:0035791	platelet-derived growth factor receptor-beta signaling pathway	2/130	14/18888	0.142857	20.756	6.15591	0.00405223	0.0161404	0.00913922	PDGFRB/ABL1	2
BP	GO:0042541	hemoglobin biosynthetic process	2/130	14/18888	0.142857	20.756	6.15591	0.00405223	0.0161404	0.00913922	HIF1A/SLC6A9	2
BP	GO:0046512	sphingosine biosynthetic process	2/130	14/18888	0.142857	20.756	6.15591	0.00405223	0.0161404	0.00913922	ASAH1/GBA1	2
BP	GO:0046520	sphingoid biosynthetic process	2/130	14/18888	0.142857	20.756	6.15591	0.00405223	0.0161404	0.00913922	ASAH1/GBA1	2
BP	GO:0048148	behavioral response to cocaine	2/130	14/18888	0.142857	20.756	6.15591	0.00405223	0.0161404	0.00913922	ABAT/HTR2A	2
BP	GO:0048243	norepinephrine secretion	2/130	14/18888	0.142857	20.756	6.15591	0.00405223	0.0161404	0.00913922	ADORA2A/OXTR	2
BP	GO:0071871	response to epinephrine	2/130	14/18888	0.142857	20.756	6.15591	0.00405223	0.0161404	0.00913922	PDE4B/ABL1	2
BP	GO:2001053	regulation of mesenchymal cell apoptotic process	2/130	14/18888	0.142857	20.756	6.15591	0.00405223	0.0161404	0.00913922	SHH/HIF1A	2
BP	GO:0021766	hippocampus development	4/130	94/18888	0.0425532	6.18265	4.1934	0.0040526	0.0161404	0.00913922	EZH2/POMGNT1/SMO/CASP3	4
BP	GO:0006775	fat-soluble vitamin metabolic process	3/130	47/18888	0.0638298	9.27398	4.72793	0.00414168	0.0164244	0.00929999	FGFR1/TNF/FGF23	3
BP	GO:0043666	regulation of phosphoprotein phosphatase activity	3/130	47/18888	0.0638298	9.27398	4.72793	0.00414168	0.0164244	0.00929999	HTT/TNF/PDGFRB	3
BP	GO:0060119	inner ear receptor cell development	3/130	47/18888	0.0638298	9.27398	4.72793	0.00414168	0.0164244	0.00929999	NAGLU/FGFR1/GABRA5	3
BP	GO:0140353	lipid export from cell	3/130	47/18888	0.0638298	9.27398	4.72793	0.00414168	0.0164244	0.00929999	TSPO/P2RX7/CRHR1	3
BP	GO:0071229	cellular response to acid chemical	4/130	95/18888	0.0421053	6.11757	4.16282	0.00420854	0.0166716	0.00943999	GRIN2D/TNF/VEGFA/EGFR	4
BP	GO:0071456	cellular response to hypoxia	5/130	154/18888	0.0324675	4.71728	3.85594	0.00427065	0.0168995	0.00956903	NDRG1/VEGFA/HIF1A/RORA/TERT	5
BP	GO:0032412	regulation of monoatomic ion transmembrane transporter activity	6/130	221/18888	0.0271493	3.94459	3.66558	0.004295	0.0169777	0.00961328	NOS1/HTT/APP/GRM5/SLC6A9/CRHR1	6
BP	GO:0044282	small molecule catabolic process	8/130	373/18888	0.0214477	3.11619	3.43643	0.00431951	0.0170563	0.0096578	UPB1/NOS1/ABAT/HNMT/HEXA/HEXB/FGF23/GCK	8
BP	GO:0002673	regulation of acute inflammatory response	3/130	48/18888	0.0625	9.08077	4.66652	0.00439581	0.0172652	0.00977612	ASH1L/TNF/ADORA1	3
BP	GO:0021795	cerebral cortex cell migration	3/130	48/18888	0.0625	9.08077	4.66652	0.00439581	0.0172652	0.00977612	ADGRG1/POU3F2/EGFR	3
BP	GO:0042596	fear response	3/130	48/18888	0.0625	9.08077	4.66652	0.00439581	0.0172652	0.00977612	GABRA5/HTR2C/CRHR1	3
BP	GO:0044273	sulfur compound catabolic process	3/130	48/18888	0.0625	9.08077	4.66652	0.00439581	0.0172652	0.00977612	NAGLU/HEXA/HEXB	3
BP	GO:0140718	facultative heterochromatin formation	3/130	48/18888	0.0625	9.08077	4.66652	0.00439581	0.0172652	0.00977612	EZH2/EHMT1/KMT2A	3
BP	GO:0032368	regulation of lipid transport	5/130	156/18888	0.0320513	4.6568	3.81796	0.00450994	0.0176759	0.0100086	SHH/PRKCD/TSPO/P2RX7/CRHR1	5
BP	GO:0050770	regulation of axonogenesis	5/130	156/18888	0.0320513	4.6568	3.81796	0.00450994	0.0176759	0.0100086	L1CAM/POU3F2/CDH2/VEGFA/MAP2K1	5
BP	GO:0010975	regulation of neuron projection development	9/130	460/18888	0.0195652	2.84268	3.3308	0.00457962	0.0179185	0.010146	L1CAM/EZH2/FGFR1/POU3F2/CDH2/VEGFA/MAP2K1/ABL1/LRRK2	9
BP	GO:0007567	parturition	2/130	15/18888	0.133333	19.3723	5.92582	0.00465465	0.0179185	0.010146	OXTR/CRHR1	2
BP	GO:0021694	cerebellar Purkinje cell layer formation	2/130	15/18888	0.133333	19.3723	5.92582	0.00465465	0.0179185	0.010146	GBA1/RORA	2
BP	GO:0032230	positive regulation of synaptic transmission, GABAergic	2/130	15/18888	0.133333	19.3723	5.92582	0.00465465	0.0179185	0.010146	ADORA2A/OXTR	2
BP	GO:0032352	positive regulation of hormone metabolic process	2/130	15/18888	0.133333	19.3723	5.92582	0.00465465	0.0179185	0.010146	ADM/HIF1A	2
BP	GO:0044849	estrous cycle	2/130	15/18888	0.133333	19.3723	5.92582	0.00465465	0.0179185	0.010146	NCOR2/OXTR	2
BP	GO:0050966	detection of mechanical stimulus involved in sensory perception of pain	2/130	15/18888	0.133333	19.3723	5.92582	0.00465465	0.0179185	0.010146	TNF/HTR2A	2
BP	GO:0051290	protein heterotetramerization	2/130	15/18888	0.133333	19.3723	5.92582	0.00465465	0.0179185	0.010146	GRIN2B/GRIN1	2
BP	GO:0060413	atrial septum morphogenesis	2/130	15/18888	0.133333	19.3723	5.92582	0.00465465	0.0179185	0.010146	NSD2/SMO	2
BP	GO:0060572	morphogenesis of an epithelial bud	2/130	15/18888	0.133333	19.3723	5.92582	0.00465465	0.0179185	0.010146	SHH/AR	2
BP	GO:0097531	mast cell migration	2/130	15/18888	0.133333	19.3723	5.92582	0.00465465	0.0179185	0.010146	VEGFA/KIT	2
BP	GO:2001028	positive regulation of endothelial cell chemotaxis	2/130	15/18888	0.133333	19.3723	5.92582	0.00465465	0.0179185	0.010146	FGFR1/VEGFA	2
BP	GO:0006479	protein methylation	3/130	49/18888	0.0612245	8.89545	4.60687	0.0046592	0.0179185	0.010146	PRMT7/EHMT1/SETD2	3
BP	GO:0008213	protein alkylation	3/130	49/18888	0.0612245	8.89545	4.60687	0.0046592	0.0179185	0.010146	PRMT7/EHMT1/SETD2	3
BP	GO:0036230	granulocyte activation	3/130	49/18888	0.0612245	8.89545	4.60687	0.0046592	0.0179185	0.010146	KMT2E/TNF/PRKCD	3
BP	GO:0042551	neuron maturation	3/130	49/18888	0.0612245	8.89545	4.60687	0.0046592	0.0179185	0.010146	AGRN/APP/LRRK2	3
BP	GO:0048546	digestive tract morphogenesis	3/130	49/18888	0.0612245	8.89545	4.60687	0.0046592	0.0179185	0.010146	SHH/HIF1A/EGFR	3
BP	GO:0070266	necroptotic process	3/130	49/18888	0.0612245	8.89545	4.60687	0.0046592	0.0179185	0.010146	OGT/TNF/PARP1	3
BP	GO:0034109	homotypic cell-cell adhesion	4/130	98/18888	0.0408163	5.9303	4.07364	0.0047006	0.0180401	0.0102149	ACTB/PRKCD/PRKCA/JAK2	4
BP	GO:0060993	kidney morphogenesis	4/130	98/18888	0.0408163	5.9303	4.07364	0.0047006	0.0180401	0.0102149	SHH/VEGFA/SMO/LRRK2	4
BP	GO:0001657	ureteric bud development	4/130	99/18888	0.040404	5.8704	4.04473	0.00487285	0.0186818	0.0105782	SHH/FGFR1/VEGFA/SMO	4
BP	GO:0001818	negative regulation of cytokine production	8/130	381/18888	0.0209974	3.05076	3.36642	0.00489952	0.0187646	0.0106251	EZH2/FGFR1/GBA1/TNF/RAD21/ELANE/CASP3/TSPO	8
BP	GO:0001754	eye photoreceptor cell differentiation	3/130	50/18888	0.06	8.71754	4.5489	0.00493195	0.0187719	0.0106292	NAGLU/VEGFA/RORB	3
BP	GO:0035094	response to nicotine	3/130	50/18888	0.06	8.71754	4.5489	0.00493195	0.0187719	0.0106292	ABAT/TNF/CASP3	3
BP	GO:0043114	regulation of vascular permeability	3/130	50/18888	0.06	8.71754	4.5489	0.00493195	0.0187719	0.0106292	ADM/VEGFA/ADORA2A	3
BP	GO:0043154	negative regulation of cysteine-type endopeptidase activity involved in apoptotic process	3/130	50/18888	0.06	8.71754	4.5489	0.00493195	0.0187719	0.0106292	TNF/VEGFA/RAF1	3
BP	GO:0051403	stress-activated MAPK cascade	3/130	50/18888	0.06	8.71754	4.5489	0.00493195	0.0187719	0.0106292	MAPK8/MAPK14/MAP2K1	3
BP	GO:0060976	coronary vasculature development	3/130	50/18888	0.06	8.71754	4.5489	0.00493195	0.0187719	0.0106292	SETD2/VEGFA/PDGFRB	3
BP	GO:1903037	regulation of leukocyte cell-cell adhesion	8/130	382/18888	0.0209424	3.04277	3.3578	0.00497603	0.0189202	0.0107132	SHH/TNF/ACTB/ELANE/CASP3/ADORA2A/JAK2/ABL1	8
BP	GO:0006493	protein O-linked glycosylation	4/130	100/18888	0.04	5.81169	4.01622	0.00504929	0.0191396	0.0108375	OGT/ST3GAL3/GALNT2/POMGNT1	4
BP	GO:0072163	mesonephric epithelium development	4/130	100/18888	0.04	5.81169	4.01622	0.00504929	0.0191396	0.0108375	SHH/FGFR1/VEGFA/SMO	4
BP	GO:0072164	mesonephric tubule development	4/130	100/18888	0.04	5.81169	4.01622	0.00504929	0.0191396	0.0108375	SHH/FGFR1/VEGFA/SMO	4
BP	GO:0036294	cellular response to decreased oxygen levels	5/130	161/18888	0.0310559	4.51218	3.72577	0.00514975	0.0195004	0.0110417	NDRG1/VEGFA/HIF1A/RORA/TERT	5
BP	GO:0002685	regulation of leukocyte migration	6/130	230/18888	0.026087	3.79023	3.54431	0.00520617	0.0195714	0.011082	TNF/APP/VEGFA/ELANE/ADORA1/ABL1	6
BP	GO:0010043	response to zinc ion	3/130	51/18888	0.0588235	8.54661	4.49253	0.00521414	0.0195714	0.011082	PARP1/TSPO/P2RX7	3
BP	GO:0042220	response to cocaine	3/130	51/18888	0.0588235	8.54661	4.49253	0.00521414	0.0195714	0.011082	ABAT/OXTR/HTR2A	3
BP	GO:0042461	photoreceptor cell development	3/130	51/18888	0.0588235	8.54661	4.49253	0.00521414	0.0195714	0.011082	NAGLU/VEGFA/RORB	3
BP	GO:0046850	regulation of bone remodeling	3/130	51/18888	0.0588235	8.54661	4.49253	0.00521414	0.0195714	0.011082	EGFR/PRKCA/P2RX7	3
BP	GO:0002263	cell activation involved in immune response	7/130	305/18888	0.0229508	3.33458	3.42184	0.00521544	0.0195714	0.011082	NSD2/KMT2A/TNF/APP/KIT/RORA/ABL1	7
BP	GO:0032755	positive regulation of interleukin-6 production	4/130	101/18888	0.039604	5.75415	3.98809	0.00522997	0.0195714	0.011082	TNF/APP/F2R/P2RX7	4
BP	GO:0042542	response to hydrogen peroxide	4/130	101/18888	0.039604	5.75415	3.98809	0.00522997	0.0195714	0.011082	EZH2/PRKCD/CASP3/ABL1	4
BP	GO:0009313	oligosaccharide catabolic process	2/130	16/18888	0.125	18.1615	5.71699	0.00529573	0.0195714	0.011082	NEU1/HEXB	2
BP	GO:0014857	regulation of skeletal muscle cell proliferation	2/130	16/18888	0.125	18.1615	5.71699	0.00529573	0.0195714	0.011082	SHH/JAK2	2
BP	GO:0021513	spinal cord dorsal/ventral patterning	2/130	16/18888	0.125	18.1615	5.71699	0.00529573	0.0195714	0.011082	SHH/SMO	2
BP	GO:0021904	dorsal/ventral neural tube patterning	2/130	16/18888	0.125	18.1615	5.71699	0.00529573	0.0195714	0.011082	SHH/SMO	2
BP	GO:0030214	hyaluronan catabolic process	2/130	16/18888	0.125	18.1615	5.71699	0.00529573	0.0195714	0.011082	HEXA/HEXB	2
BP	GO:0030810	positive regulation of nucleotide biosynthetic process	2/130	16/18888	0.125	18.1615	5.71699	0.00529573	0.0195714	0.011082	NOS1/VCP	2
BP	GO:0031649	heat generation	2/130	16/18888	0.125	18.1615	5.71699	0.00529573	0.0195714	0.011082	ABAT/TNF	2
BP	GO:0044065	regulation of respiratory system process	2/130	16/18888	0.125	18.1615	5.71699	0.00529573	0.0195714	0.011082	FTO/ADORA1	2
BP	GO:0051770	positive regulation of nitric-oxide synthase biosynthetic process	2/130	16/18888	0.125	18.1615	5.71699	0.00529573	0.0195714	0.011082	JAK2/LRRK2	2
BP	GO:0071071	regulation of phospholipid biosynthetic process	2/130	16/18888	0.125	18.1615	5.71699	0.00529573	0.0195714	0.011082	HTR2C/HTR2A	2
BP	GO:0072520	seminiferous tubule development	2/130	16/18888	0.125	18.1615	5.71699	0.00529573	0.0195714	0.011082	ADGRG1/AR	2
BP	GO:0097152	mesenchymal cell apoptotic process	2/130	16/18888	0.125	18.1615	5.71699	0.00529573	0.0195714	0.011082	SHH/HIF1A	2
BP	GO:1900006	positive regulation of dendrite development	2/130	16/18888	0.125	18.1615	5.71699	0.00529573	0.0195714	0.011082	EZH2/ABL1	2
BP	GO:1900373	positive regulation of purine nucleotide biosynthetic process	2/130	16/18888	0.125	18.1615	5.71699	0.00529573	0.0195714	0.011082	NOS1/VCP	2
BP	GO:1902065	response to L-glutamate	2/130	16/18888	0.125	18.1615	5.71699	0.00529573	0.0195714	0.011082	GRIN2D/TNF	2
BP	GO:2000846	regulation of corticosteroid hormone secretion	2/130	16/18888	0.125	18.1615	5.71699	0.00529573	0.0195714	0.011082	TSPO/CRHR1	2
BP	GO:0045861	negative regulation of proteolysis	6/130	231/18888	0.025974	3.77383	3.53122	0.00531551	0.0196249	0.0111122	OGT/SHH/TNF/VEGFA/RAF1/LRRK2	6
BP	GO:0048608	reproductive structure development	7/130	307/18888	0.0228013	3.31285	3.40128	0.00540114	0.0199211	0.01128	SHH/ADGRG1/ASH1L/VEGFA/KIT/AR/CASP3	7
BP	GO:0007200	phospholipase C-activating G protein-coupled receptor signaling pathway	4/130	102/18888	0.0392157	5.69774	3.96033	0.00541493	0.0199321	0.0112862	F2R/GRM5/HTR2C/HTR2A	4
BP	GO:0043266	regulation of potassium ion transport	4/130	102/18888	0.0392157	5.69774	3.96033	0.00541493	0.0199321	0.0112862	NOS1/ADORA1/HTR2A/GCK	4
BP	GO:0010543	regulation of platelet activation	3/130	52/18888	0.0576923	8.38225	4.43768	0.00550588	0.0202065	0.0114415	PRKCD/PRKCA/JAK2	3
BP	GO:0071470	cellular response to osmotic stress	3/130	52/18888	0.0576923	8.38225	4.43768	0.00550588	0.0202065	0.0114415	CASP3/CASP1/TSPO	3
BP	GO:1904707	positive regulation of vascular associated smooth muscle cell proliferation	3/130	52/18888	0.0576923	8.38225	4.43768	0.00550588	0.0202065	0.0114415	TNF/JAK2/TERT	3
BP	GO:0007033	vacuole organization	6/130	234/18888	0.025641	3.72544	3.49236	0.00565368	0.0206667	0.0117021	NAGLU/GBA1/HEXA/HEXB/P2RX7/LRRK2	6
BP	GO:0007411	axon guidance	6/130	234/18888	0.025641	3.72544	3.49236	0.00565368	0.0206667	0.0117021	L1CAM/SHH/NCAM1/APP/VEGFA/SMO	6
BP	GO:0010594	regulation of endothelial cell migration	6/130	234/18888	0.025641	3.72544	3.49236	0.00565368	0.0206667	0.0117021	FGFR1/TNF/VEGFA/HIF1A/PRKCA/ABL1	6
BP	GO:0097485	neuron projection guidance	6/130	234/18888	0.025641	3.72544	3.49236	0.00565368	0.0206667	0.0117021	L1CAM/SHH/NCAM1/APP/VEGFA/SMO	6
BP	GO:0007162	negative regulation of cell adhesion	7/130	310/18888	0.0225806	3.28079	3.37076	0.00568896	0.0207546	0.0117519	SHH/VEGFA/PRKCD/CASP3/ADORA2A/JAK2/ABL1	7
BP	GO:0030217	T cell differentiation	7/130	310/18888	0.0225806	3.28079	3.37076	0.00568896	0.0207546	0.0117519	SHH/KMT2A/GBA1/ACTB/KIT/RORA/ABL1	7
BP	GO:0007249	canonical NF-kappaB signal transduction	7/130	311/18888	0.022508	3.27024	3.36066	0.00578741	0.0209993	0.0118905	TNF/VEGFA/PARP1/F2R/RORA/CASP1/ABL1	7
BP	GO:0061458	reproductive system development	7/130	311/18888	0.022508	3.27024	3.36066	0.00578741	0.0209993	0.0118905	SHH/ADGRG1/ASH1L/VEGFA/KIT/AR/CASP3	7
BP	GO:0001823	mesonephros development	4/130	104/18888	0.0384615	5.58817	3.9059	0.00579788	0.0209993	0.0118905	SHH/FGFR1/VEGFA/SMO	4
BP	GO:0010389	regulation of G2/M transition of mitotic cell cycle	4/130	104/18888	0.0384615	5.58817	3.9059	0.00579788	0.0209993	0.0118905	APP/RAD21/CCND1/CDK4	4
BP	GO:0032642	regulation of chemokine production	4/130	104/18888	0.0384615	5.58817	3.9059	0.00579788	0.0209993	0.0118905	TNF/APP/ELANE/HIF1A	4
BP	GO:0002066	columnar/cuboidal epithelial cell development	3/130	53/18888	0.0566038	8.22409	4.38428	0.00580724	0.0209993	0.0118905	CDH2/SMO/HIF1A	3
BP	GO:0038084	vascular endothelial growth factor signaling pathway	3/130	53/18888	0.0566038	8.22409	4.38428	0.00580724	0.0209993	0.0118905	VEGFA/FLT1/PDGFRB	3
BP	GO:0046622	positive regulation of organ growth	3/130	53/18888	0.0566038	8.22409	4.38428	0.00580724	0.0209993	0.0118905	FGFR1/SMO/MAPK14	3
BP	GO:0048009	insulin-like growth factor receptor signaling pathway	3/130	53/18888	0.0566038	8.22409	4.38428	0.00580724	0.0209993	0.0118905	AR/MAP2K1/RAF1	3
BP	GO:2000058	regulation of ubiquitin-dependent protein catabolic process	5/130	166/18888	0.0301205	4.37627	3.63727	0.00585142	0.0211384	0.0119692	OGT/SHH/GBA1/VCP/LRRK2	5
BP	GO:0001654	eye development	8/130	393/18888	0.0203562	2.9576	3.26478	0.00587956	0.0212193	0.012015	SHH/NAGLU/VEGFA/FLT1/PDGFRB/HIF1A/EGFR/RORB	8
BP	GO:0006302	double-strand break repair	7/130	312/18888	0.0224359	3.25976	3.35061	0.00588713	0.0212259	0.0120188	NSD2/SETD2/ACTB/PARP1/RAD21/VCP/ABL1	7
BP	GO:0007063	regulation of sister chromatid cohesion	2/130	17/18888	0.117647	17.0932	5.52624	0.00597492	0.0212571	0.0120365	NAA10/RAD21	2
BP	GO:0044320	cellular response to leptin stimulus	2/130	17/18888	0.117647	17.0932	5.52624	0.00597492	0.0212571	0.0120365	FGF23/GCK	2
BP	GO:0046068	cGMP metabolic process	2/130	17/18888	0.117647	17.0932	5.52624	0.00597492	0.0212571	0.0120365	PDE10A/RORA	2
BP	GO:0051000	positive regulation of nitric-oxide synthase activity	2/130	17/18888	0.117647	17.0932	5.52624	0.00597492	0.0212571	0.0120365	HIF1A/TERT	2
BP	GO:0060080	inhibitory postsynaptic potential	2/130	17/18888	0.117647	17.0932	5.52624	0.00597492	0.0212571	0.0120365	ABAT/ADORA2A	2
BP	GO:0060221	retinal rod cell differentiation	2/130	17/18888	0.117647	17.0932	5.52624	0.00597492	0.0212571	0.0120365	NAGLU/RORB	2
BP	GO:0060644	mammary gland epithelial cell differentiation	2/130	17/18888	0.117647	17.0932	5.52624	0.00597492	0.0212571	0.0120365	SMO/HIF1A	2
BP	GO:0070254	mucus secretion	2/130	17/18888	0.117647	17.0932	5.52624	0.00597492	0.0212571	0.0120365	EGFR/ADORA1	2
BP	GO:0170043	non-proteinogenic amino acid biosynthetic process	2/130	17/18888	0.117647	17.0932	5.52624	0.00597492	0.0212571	0.0120365	UPB1/ABAT	2
BP	GO:1901550	regulation of endothelial cell development	2/130	17/18888	0.117647	17.0932	5.52624	0.00597492	0.0212571	0.0120365	TNF/VEGFA	2
BP	GO:1902036	regulation of hematopoietic stem cell differentiation	2/130	17/18888	0.117647	17.0932	5.52624	0.00597492	0.0212571	0.0120365	SETD1A/ABL1	2
BP	GO:1903140	regulation of establishment of endothelial barrier	2/130	17/18888	0.117647	17.0932	5.52624	0.00597492	0.0212571	0.0120365	TNF/VEGFA	2
BP	GO:2000310	regulation of NMDA receptor activity	2/130	17/18888	0.117647	17.0932	5.52624	0.00597492	0.0212571	0.0120365	APP/SLC6A9	2
BP	GO:0031507	heterochromatin formation	4/130	105/18888	0.0380952	5.53495	3.87922	0.00599595	0.0212571	0.0120365	KMT2D/EZH2/EHMT1/KMT2A	4
BP	GO:0032602	chemokine production	4/130	105/18888	0.0380952	5.53495	3.87922	0.00599595	0.0212571	0.0120365	TNF/APP/ELANE/HIF1A	4
BP	GO:0045639	positive regulation of myeloid cell differentiation	4/130	105/18888	0.0380952	5.53495	3.87922	0.00599595	0.0212571	0.0120365	TNF/HIF1A/PRKCA/MAPK14	4
BP	GO:1901222	regulation of non-canonical NF-kappaB signal transduction	4/130	105/18888	0.0380952	5.53495	3.87922	0.00599595	0.0212571	0.0120365	TNF/APP/EGFR/VCP	4
BP	GO:0050796	regulation of insulin secretion	5/130	167/18888	0.0299401	4.35007	3.61999	0.00599944	0.0212571	0.0120365	ABAT/TNF/HIF1A/JAK2/GCK	5
BP	GO:0006909	phagocytosis	6/130	237/18888	0.0253165	3.67829	3.45414	0.00600734	0.0212647	0.0120407	ELANE/PRKCD/ADORA1/ADORA2A/P2RX7/ABL1	6
BP	GO:0030520	intracellular estrogen receptor signaling pathway	3/130	54/18888	0.0555556	8.07179	4.33227	0.0061183	0.0215954	0.012228	KMT2D/PARP1/AR	3
BP	GO:0031103	axon regeneration	3/130	54/18888	0.0555556	8.07179	4.33227	0.0061183	0.0215954	0.012228	JAK2/MAP2K1/TSPO	3
BP	GO:0050873	brown fat cell differentiation	3/130	54/18888	0.0555556	8.07179	4.33227	0.0061183	0.0215954	0.012228	PRDM16/FTO/MAPK14	3
BP	GO:0003205	cardiac chamber development	5/130	168/18888	0.0297619	4.32418	3.60285	0.00615009	0.0216868	0.0122798	NSD2/NAGLU/SMO/HIF1A/SCN5A	5
BP	GO:0002532	production of molecular mediator involved in inflammatory response	4/130	106/18888	0.0377358	5.48273	3.85287	0.00619848	0.0218158	0.0123528	EZH2/TNF/HIF1A/MAPK14	4
BP	GO:0046425	regulation of receptor signaling pathway via JAK-STAT	4/130	106/18888	0.0377358	5.48273	3.85287	0.00619848	0.0218158	0.0123528	TNF/F2R/KIT/JAK2	4
BP	GO:0150063	visual system development	8/130	397/18888	0.0201511	2.9278	3.23175	0.00623741	0.0219319	0.0124185	SHH/NAGLU/VEGFA/FLT1/PDGFRB/HIF1A/EGFR/RORB	8
BP	GO:0007631	feeding behavior	4/130	107/18888	0.0373832	5.43149	3.82686	0.00640551	0.0224802	0.012729	APP/ADORA2A/OXTR/HTR2C	4
BP	GO:1901655	cellular response to ketone	4/130	107/18888	0.0373832	5.43149	3.82686	0.00640551	0.0224802	0.012729	AR/EGFR/JAK2/CDK4	4
BP	GO:0045785	positive regulation of cell adhesion	9/130	485/18888	0.0185567	2.69615	3.15028	0.00641887	0.0225057	0.0127434	SHH/ADGRG1/TNF/ACTB/VEGFA/ELANE/PRKCA/JAK2/ABL1	9
BP	GO:1903351	cellular response to dopamine	3/130	55/18888	0.0545455	7.92503	4.28157	0.00643915	0.0225554	0.0127716	HTR2A/ABL1/LRRK2	3
BP	GO:0043409	negative regulation of MAPK cascade	5/130	170/18888	0.0294118	4.2733	3.56895	0.00645933	0.0226046	0.0127994	GBA1/ASH1L/PRKCD/P2RX7/ABL1	5
BP	GO:1903320	regulation of protein modification by small protein conjugation or removal	6/130	241/18888	0.0248963	3.61724	3.40414	0.00650367	0.0227382	0.0128751	OGT/HIF1A/VCP/TSPO/ABL1/LRRK2	6
BP	GO:1901890	positive regulation of cell junction assembly	4/130	108/18888	0.037037	5.3812	3.80117	0.00661708	0.0230633	0.0130592	AGRN/VEGFA/OXTR/ABL1	4
BP	GO:1902414	protein localization to cell junction	4/130	108/18888	0.037037	5.3812	3.80117	0.00661708	0.0230633	0.0130592	OGT/HRAS/ACTB/GRIN2A	4
BP	GO:1903076	regulation of protein localization to plasma membrane	4/130	108/18888	0.037037	5.3812	3.80117	0.00661708	0.0230633	0.0130592	TNF/ACTB/AR/EGFR	4
BP	GO:0001822	kidney development	7/130	319/18888	0.0219436	3.18823	3.28136	0.00662164	0.0230633	0.0130592	SHH/EZH2/FGFR1/VEGFA/PDGFRB/SMO/LRRK2	7
BP	GO:0010042	response to manganese ion	2/130	18/18888	0.111111	16.1436	5.35105	0.00669165	0.0230893	0.0130739	TSPO/LRRK2	2
BP	GO:0020027	hemoglobin metabolic process	2/130	18/18888	0.111111	16.1436	5.35105	0.00669165	0.0230893	0.0130739	HIF1A/SLC6A9	2
BP	GO:0021511	spinal cord patterning	2/130	18/18888	0.111111	16.1436	5.35105	0.00669165	0.0230893	0.0130739	SHH/SMO	2
BP	GO:0032239	regulation of nucleobase-containing compound transport	2/130	18/18888	0.111111	16.1436	5.35105	0.00669165	0.0230893	0.0130739	SETD2/ADORA1	2
BP	GO:0032930	positive regulation of superoxide anion generation	2/130	18/18888	0.111111	16.1436	5.35105	0.00669165	0.0230893	0.0130739	PRKCD/EGFR	2
BP	GO:0042753	positive regulation of circadian rhythm	2/130	18/18888	0.111111	16.1436	5.35105	0.00669165	0.0230893	0.0130739	RORA/ADORA2A	2
BP	GO:0071243	cellular response to arsenic-containing substance	2/130	18/18888	0.111111	16.1436	5.35105	0.00669165	0.0230893	0.0130739	HNRNPA1/VCP	2
BP	GO:0090190	positive regulation of branching involved in ureteric bud morphogenesis	2/130	18/18888	0.111111	16.1436	5.35105	0.00669165	0.0230893	0.0130739	VEGFA/SMO	2
BP	GO:0150078	positive regulation of neuroinflammatory response	2/130	18/18888	0.111111	16.1436	5.35105	0.00669165	0.0230893	0.0130739	TNF/LRRK2	2
BP	GO:2001169	regulation of ATP biosynthetic process	2/130	18/18888	0.111111	16.1436	5.35105	0.00669165	0.0230893	0.0130739	PARP1/VCP	2
BP	GO:0048880	sensory system development	8/130	403/18888	0.0198511	2.88421	3.18297	0.00680498	0.0234584	0.0132829	SHH/NAGLU/VEGFA/FLT1/PDGFRB/HIF1A/EGFR/RORB	8
BP	GO:0060326	cell chemotaxis	7/130	322/18888	0.0217391	3.15853	3.25227	0.00695652	0.0239585	0.013566	FGFR1/VEGFA/FLT1/PDGFRB/KIT/PRKCD/PDE4B	7
BP	GO:0001755	neural crest cell migration	3/130	57/18888	0.0526316	7.64696	4.18393	0.00711052	0.0243978	0.0138148	SHH/SMO/HIF1A	3
BP	GO:0034332	adherens junction organization	3/130	57/18888	0.0526316	7.64696	4.18393	0.00711052	0.0243978	0.0138148	ACTB/CDH2/VEGFA	3
BP	GO:0060986	endocrine hormone secretion	3/130	57/18888	0.0526316	7.64696	4.18393	0.00711052	0.0243978	0.0138148	FGFR1/TSPO/CRHR1	3
BP	GO:1903350	response to dopamine	3/130	57/18888	0.0526316	7.64696	4.18393	0.00711052	0.0243978	0.0138148	HTR2A/ABL1/LRRK2	3
BP	GO:1901873	regulation of post-translational protein modification	6/130	246/18888	0.0243902	3.54371	3.3431	0.00716526	0.0245628	0.0139082	OGT/HIF1A/VCP/TSPO/ABL1/LRRK2	6
BP	GO:0009101	glycoprotein biosynthetic process	7/130	324/18888	0.0216049	3.13903	3.23306	0.00718667	0.0246133	0.0139368	OGT/MGAT2/ST3GAL3/DPAGT1/GALNT2/POMGNT1/B4GALT1	7
BP	GO:0030203	glycosaminoglycan metabolic process	4/130	111/18888	0.036036	5.23576	3.72597	0.00727948	0.0249081	0.0141037	ST3GAL3/NAGLU/HEXA/HEXB	4
BP	GO:0045930	negative regulation of mitotic cell cycle	6/130	248/18888	0.0241935	3.51514	3.31913	0.00744308	0.0250652	0.0141927	EZH2/TNF/RAD21/EGFR/CCND1/ABL1	6
BP	GO:0002523	leukocyte migration involved in inflammatory response	2/130	19/18888	0.105263	15.2939	5.18936	0.0074454	0.0250652	0.0141927	TNF/ELANE	2
BP	GO:0007620	copulation	2/130	19/18888	0.105263	15.2939	5.18936	0.0074454	0.0250652	0.0141927	ABAT/OXTR	2
BP	GO:0021692	cerebellar Purkinje cell layer morphogenesis	2/130	19/18888	0.105263	15.2939	5.18936	0.0074454	0.0250652	0.0141927	GBA1/RORA	2
BP	GO:0033194	response to hydroperoxide	2/130	19/18888	0.105263	15.2939	5.18936	0.0074454	0.0250652	0.0141927	PRKCD/JAK2	2
BP	GO:0035930	corticosteroid hormone secretion	2/130	19/18888	0.105263	15.2939	5.18936	0.0074454	0.0250652	0.0141927	TSPO/CRHR1	2
BP	GO:0045780	positive regulation of bone resorption	2/130	19/18888	0.105263	15.2939	5.18936	0.0074454	0.0250652	0.0141927	EGFR/PRKCA	2
BP	GO:0050965	detection of temperature stimulus involved in sensory perception of pain	2/130	19/18888	0.105263	15.2939	5.18936	0.0074454	0.0250652	0.0141927	ADORA1/HTR2A	2
BP	GO:0051797	regulation of hair follicle development	2/130	19/18888	0.105263	15.2939	5.18936	0.0074454	0.0250652	0.0141927	TNF/SMO	2
BP	GO:0060438	trachea development	2/130	19/18888	0.105263	15.2939	5.18936	0.0074454	0.0250652	0.0141927	SHH/MAP2K1	2
BP	GO:0061298	retina vasculature development in camera-type eye	2/130	19/18888	0.105263	15.2939	5.18936	0.0074454	0.0250652	0.0141927	PDGFRB/HIF1A	2
BP	GO:1900242	regulation of synaptic vesicle endocytosis	2/130	19/18888	0.105263	15.2939	5.18936	0.0074454	0.0250652	0.0141927	ACTB/LRRK2	2
BP	GO:1902514	regulation of calcium ion transmembrane transport via high voltage-gated calcium channel	2/130	19/18888	0.105263	15.2939	5.18936	0.0074454	0.0250652	0.0141927	NOS1/PDE4B	2
BP	GO:1905038	regulation of membrane lipid metabolic process	2/130	19/18888	0.105263	15.2939	5.18936	0.0074454	0.0250652	0.0141927	TNF/PRKCD	2
BP	GO:0000724	double-strand break repair via homologous recombination	5/130	176/18888	0.0284091	4.12762	3.47033	0.00745242	0.0250652	0.0141927	SETD2/ACTB/PARP1/RAD21/ABL1	5
BP	GO:0032635	interleukin-6 production	5/130	176/18888	0.0284091	4.12762	3.47033	0.00745242	0.0250652	0.0141927	GBA1/TNF/APP/F2R/P2RX7	5
BP	GO:0032675	regulation of interleukin-6 production	5/130	176/18888	0.0284091	4.12762	3.47033	0.00745242	0.0250652	0.0141927	GBA1/TNF/APP/F2R/P2RX7	5
BP	GO:0051339	regulation of lyase activity	3/130	58/18888	0.0517241	7.51512	4.13686	0.00746117	0.0250652	0.0141927	NOS1/RAF1/CRHR1	3
BP	GO:0071868	cellular response to monoamine stimulus	3/130	58/18888	0.0517241	7.51512	4.13686	0.00746117	0.0250652	0.0141927	HTR2A/ABL1/LRRK2	3
BP	GO:0071870	cellular response to catecholamine stimulus	3/130	58/18888	0.0517241	7.51512	4.13686	0.00746117	0.0250652	0.0141927	HTR2A/ABL1/LRRK2	3
BP	GO:0010634	positive regulation of epithelial cell migration	5/130	177/18888	0.0282486	4.1043	3.45432	0.00762771	0.0255781	0.0144831	FGFR1/VEGFA/HIF1A/PRKCA/ABL1	5
BP	GO:0071453	cellular response to oxygen levels	5/130	177/18888	0.0282486	4.1043	3.45432	0.00762771	0.0255781	0.0144831	NDRG1/VEGFA/HIF1A/RORA/TERT	5
BP	GO:0018958	phenol-containing compound metabolic process	4/130	113/18888	0.0353982	5.14309	3.67734	0.00774455	0.0258993	0.014665	ABAT/GRIN2A/CTSK/CTSB	4
BP	GO:0060840	artery development	4/130	113/18888	0.0353982	5.14309	3.67734	0.00774455	0.0258993	0.014665	SHH/NAGLU/VEGFA/PDGFRB	4
BP	GO:0070252	actin-mediated cell contraction	4/130	113/18888	0.0353982	5.14309	3.67734	0.00774455	0.0258993	0.014665	SCN4A/ADORA1/PDE4B/SCN5A	4
BP	GO:0002757	immune response-activating signaling pathway	9/130	500/18888	0.018	2.61526	3.04734	0.00776837	0.025932	0.0146835	MAPK8/NAGLU/HRAS/TNF/PARP1/PRKCD/PDE4B/CASP1/ABL1	9
BP	GO:0007264	small GTPase-mediated signal transduction	9/130	500/18888	0.018	2.61526	3.04734	0.00776837	0.025932	0.0146835	NRAS/OGT/KRAS/ADGRG1/HRAS/F2R/RAF1/ABL1/LRRK2	9
BP	GO:0072001	renal system development	7/130	329/18888	0.0212766	3.09133	3.18568	0.00778676	0.0259699	0.014705	SHH/EZH2/FGFR1/VEGFA/PDGFRB/SMO/LRRK2	7
BP	GO:0010921	regulation of phosphatase activity	3/130	59/18888	0.0508475	7.38774	4.09091	0.0078219	0.0259932	0.0147182	HTT/TNF/PDGFRB	3
BP	GO:0031098	stress-activated protein kinase signaling cascade	3/130	59/18888	0.0508475	7.38774	4.09091	0.0078219	0.0259932	0.0147182	MAPK8/MAPK14/MAP2K1	3
BP	GO:0060612	adipose tissue development	3/130	59/18888	0.0508475	7.38774	4.09091	0.0078219	0.0259932	0.0147182	HRAS/FTO/PARP1	3
BP	GO:0098900	regulation of action potential	3/130	59/18888	0.0508475	7.38774	4.09091	0.0078219	0.0259932	0.0147182	GBA1/TNF/SCN5A	3
BP	GO:0042177	negative regulation of protein catabolic process	4/130	114/18888	0.0350877	5.09798	3.65345	0.00798424	0.0264938	0.0150016	OGT/SHH/GRIN2A/EGFR	4
BP	GO:1903034	regulation of response to wounding	5/130	179/18888	0.027933	4.05844	3.42264	0.00798688	0.0264938	0.0150016	HRAS/TNF/F2R/PRKCD/MAP2K1	5
BP	GO:0030198	extracellular matrix organization	7/130	332/18888	0.0210843	3.06339	3.15768	0.00816418	0.0268604	0.0152092	POMGNT1/B4GALT1/TNF/APP/ELANE/CTSK/ABL1	7
BP	GO:0001658	branching involved in ureteric bud morphogenesis	3/130	60/18888	0.05	7.26462	4.04602	0.00819277	0.0268604	0.0152092	SHH/VEGFA/SMO	3
BP	GO:0046324	regulation of glucose import	3/130	60/18888	0.05	7.26462	4.04602	0.00819277	0.0268604	0.0152092	TNF/MAPK14/TERT	3
BP	GO:0060038	cardiac muscle cell proliferation	3/130	60/18888	0.05	7.26462	4.04602	0.00819277	0.0268604	0.0152092	FGFR1/MAPK14/ABL1	3
BP	GO:0071867	response to monoamine	3/130	60/18888	0.05	7.26462	4.04602	0.00819277	0.0268604	0.0152092	HTR2A/ABL1/LRRK2	3
BP	GO:0071869	response to catecholamine	3/130	60/18888	0.05	7.26462	4.04602	0.00819277	0.0268604	0.0152092	HTR2A/ABL1/LRRK2	3
BP	GO:0051099	positive regulation of binding	4/130	115/18888	0.0347826	5.05365	3.62984	0.00822876	0.0268604	0.0152092	APP/TERT/ABL1/LRRK2	4
BP	GO:0051963	regulation of synapse assembly	4/130	115/18888	0.0347826	5.05365	3.62984	0.00822876	0.0268604	0.0152092	OGT/AGRN/APP/OXTR	4
BP	GO:1904035	regulation of epithelial cell apoptotic process	4/130	115/18888	0.0347826	5.05365	3.62984	0.00822876	0.0268604	0.0152092	TNF/JAK2/TERT/ABL1	4
BP	GO:2000278	regulation of DNA biosynthetic process	4/130	115/18888	0.0347826	5.05365	3.62984	0.00822876	0.0268604	0.0152092	CERS1/HNRNPA1/TNF/PDGFRB	4
BP	GO:0002029	desensitization of G protein-coupled receptor signaling pathway	2/130	20/18888	0.1	14.5292	5.03947	0.00823563	0.0268604	0.0152092	ADM/GRM5	2
BP	GO:0006670	sphingosine metabolic process	2/130	20/18888	0.1	14.5292	5.03947	0.00823563	0.0268604	0.0152092	ASAH1/GBA1	2
BP	GO:0006700	C21-steroid hormone biosynthetic process	2/130	20/18888	0.1	14.5292	5.03947	0.00823563	0.0268604	0.0152092	ADM/TSPO	2
BP	GO:0010738	regulation of protein kinase A signaling	2/130	20/18888	0.1	14.5292	5.03947	0.00823563	0.0268604	0.0152092	PDE4A/LRRK2	2
BP	GO:0015812	gamma-aminobutyric acid transport	2/130	20/18888	0.1	14.5292	5.03947	0.00823563	0.0268604	0.0152092	ABAT/P2RX7	2
BP	GO:0051767	nitric-oxide synthase biosynthetic process	2/130	20/18888	0.1	14.5292	5.03947	0.00823563	0.0268604	0.0152092	JAK2/LRRK2	2
BP	GO:0051769	regulation of nitric-oxide synthase biosynthetic process	2/130	20/18888	0.1	14.5292	5.03947	0.00823563	0.0268604	0.0152092	JAK2/LRRK2	2
BP	GO:1902004	positive regulation of amyloid-beta formation	2/130	20/18888	0.1	14.5292	5.03947	0.00823563	0.0268604	0.0152092	TNF/CASP3	2
BP	GO:1903376	regulation of oxidative stress-induced neuron intrinsic apoptotic signaling pathway	2/130	20/18888	0.1	14.5292	5.03947	0.00823563	0.0268604	0.0152092	PARP1/HIF1A	2
BP	GO:0043062	extracellular structure organization	7/130	333/18888	0.021021	3.05419	3.14842	0.00829293	0.0270234	0.0153015	POMGNT1/B4GALT1/TNF/APP/ELANE/CTSK/ABL1	7
BP	GO:0000725	recombinational repair	5/130	181/18888	0.0276243	4.0136	3.39143	0.00835765	0.0272103	0.0154073	SETD2/ACTB/PARP1/RAD21/ABL1	5
BP	GO:0043254	regulation of protein-containing complex assembly	8/130	418/18888	0.0191388	2.78071	3.06485	0.00839518	0.0273084	0.0154629	MAPK8/GBA1/TNF/VEGFA/PRKCD/VCP/RAF1/ABL1	8
BP	GO:0045229	external encapsulating structure organization	7/130	334/18888	0.0209581	3.04505	3.13919	0.00842319	0.0273754	0.0155008	POMGNT1/B4GALT1/TNF/APP/ELANE/CTSK/ABL1	7
BP	GO:0006368	transcription elongation by RNA polymerase II	4/130	116/18888	0.0344828	5.01008	3.60651	0.00847815	0.0275056	0.0155745	SHH/EZH2/SETD2/PARP1	4
BP	GO:1902749	regulation of cell cycle G2/M phase transition	4/130	116/18888	0.0344828	5.01008	3.60651	0.00847815	0.0275056	0.0155745	APP/RAD21/CCND1/CDK4	4
BP	GO:0007159	leukocyte cell-cell adhesion	8/130	419/18888	0.0190931	2.77408	3.05716	0.00851032	0.0275857	0.0156199	SHH/TNF/ACTB/ELANE/CASP3/ADORA2A/JAK2/ABL1	8
BP	GO:0008347	glial cell migration	3/130	61/18888	0.0491803	7.14552	4.00215	0.00857384	0.0277429	0.0157089	ADGRG1/HEXB/TSPO	3
BP	GO:0045744	negative regulation of G protein-coupled receptor signaling pathway	3/130	61/18888	0.0491803	7.14552	4.00215	0.00857384	0.0277429	0.0157089	ADM/GRM5/PDE4B	3
BP	GO:0060485	mesenchyme development	7/130	336/18888	0.0208333	3.02692	3.12084	0.00868821	0.0280883	0.0159045	SHH/EZH2/FGFR1/NCAM1/CDH2/SMO/HIF1A	7
BP	GO:0001649	osteoblast differentiation	6/130	257/18888	0.0233463	3.39204	3.21423	0.00879044	0.028394	0.0160776	SHH/TNF/FGF23/SMO/RORB/MAPK14	6
BP	GO:2000351	regulation of endothelial cell apoptotic process	3/130	62/18888	0.0483871	7.03027	3.95926	0.00896516	0.028933	0.0163828	TNF/TERT/ABL1	3
BP	GO:0006677	glycosylceramide metabolic process	2/130	21/18888	0.0952381	13.8374	4.89998	0.0090618	0.0289413	0.0163875	GBA1/PRKCD	2
BP	GO:0016137	glycoside metabolic process	2/130	21/18888	0.0952381	13.8374	4.89998	0.0090618	0.0289413	0.0163875	GBA1/NAGA	2
BP	GO:0022401	negative adaptation of signaling pathway	2/130	21/18888	0.0952381	13.8374	4.89998	0.0090618	0.0289413	0.0163875	ADM/GRM5	2
BP	GO:0030502	negative regulation of bone mineralization	2/130	21/18888	0.0952381	13.8374	4.89998	0.0090618	0.0289413	0.0163875	FGF23/HIF1A	2
BP	GO:0032928	regulation of superoxide anion generation	2/130	21/18888	0.0952381	13.8374	4.89998	0.0090618	0.0289413	0.0163875	PRKCD/EGFR	2
BP	GO:0035809	regulation of urine volume	2/130	21/18888	0.0952381	13.8374	4.89998	0.0090618	0.0289413	0.0163875	ADM/ADORA2A	2
BP	GO:0042474	middle ear morphogenesis	2/130	21/18888	0.0952381	13.8374	4.89998	0.0090618	0.0289413	0.0163875	NAGLU/FGFR1	2
BP	GO:0043586	tongue development	2/130	21/18888	0.0952381	13.8374	4.89998	0.0090618	0.0289413	0.0163875	KIT/EGFR	2
BP	GO:0061577	calcium ion transmembrane transport via high voltage-gated calcium channel	2/130	21/18888	0.0952381	13.8374	4.89998	0.0090618	0.0289413	0.0163875	NOS1/PDE4B	2
BP	GO:0090189	regulation of branching involved in ureteric bud morphogenesis	2/130	21/18888	0.0952381	13.8374	4.89998	0.0090618	0.0289413	0.0163875	VEGFA/SMO	2
BP	GO:0097709	connective tissue replacement	2/130	21/18888	0.0952381	13.8374	4.89998	0.0090618	0.0289413	0.0163875	F2R/HIF1A	2
BP	GO:1902683	regulation of receptor localization to synapse	2/130	21/18888	0.0952381	13.8374	4.89998	0.0090618	0.0289413	0.0163875	OGT/HRAS	2
BP	GO:0043500	muscle adaptation	4/130	119/18888	0.0336134	4.88378	3.53807	0.00925587	0.0295356	0.016724	EZH2/PARP1/PRKCA/SCN5A	4
BP	GO:0015695	organic cation transport	3/130	63/18888	0.047619	6.91868	3.91731	0.00936681	0.0297866	0.0168661	ACTB/ADORA2A/OXTR	3
BP	GO:0032757	positive regulation of interleukin-8 production	3/130	63/18888	0.047619	6.91868	3.91731	0.00936681	0.0297866	0.0168661	TNF/F2R/ELANE	3
BP	GO:0045428	regulation of nitric oxide biosynthetic process	3/130	63/18888	0.047619	6.91868	3.91731	0.00936681	0.0297866	0.0168661	TNF/JAK2/TSPO	3
BP	GO:2000117	negative regulation of cysteine-type endopeptidase activity	3/130	63/18888	0.047619	6.91868	3.91731	0.00936681	0.0297866	0.0168661	TNF/VEGFA/RAF1	3
BP	GO:0021700	developmental maturation	7/130	341/18888	0.0205279	2.98254	3.07555	0.0093776	0.0297953	0.016871	FGFR1/AGRN/GBA1/APP/VEGFA/HIF1A/LRRK2	7
BP	GO:0071346	cellular response to type II interferon	4/130	120/18888	0.0333333	4.84308	3.51577	0.00952509	0.0302379	0.0171216	TNF/JAK2/CASP1/RAF1	4
BP	GO:0016032	viral process	8/130	428/18888	0.0186916	2.71574	2.98895	0.00960071	0.0304517	0.0172427	MGAT2/ST3GAL3/NCAM1/TNF/EGFR/VCP/HTR2A/CTSB	8
BP	GO:0070050	neuron cellular homeostasis	3/130	64/18888	0.046875	6.81058	3.87626	0.00977882	0.0309901	0.0175475	HEXB/APP/ADORA1	3
BP	GO:0001759	organ induction	2/130	22/18888	0.0909091	13.2084	4.76969	0.0099234	0.0311276	0.0176254	FGFR1/AR	2
BP	GO:0002433	immune response-regulating cell surface receptor signaling pathway involved in phagocytosis	2/130	22/18888	0.0909091	13.2084	4.76969	0.0099234	0.0311276	0.0176254	PRKCD/ABL1	2
BP	GO:0034260	negative regulation of GTPase activity	2/130	22/18888	0.0909091	13.2084	4.76969	0.0099234	0.0311276	0.0176254	HRAS/LRRK2	2
BP	GO:0034312	diol biosynthetic process	2/130	22/18888	0.0909091	13.2084	4.76969	0.0099234	0.0311276	0.0176254	ASAH1/GBA1	2
BP	GO:0036480	neuron intrinsic apoptotic signaling pathway in response to oxidative stress	2/130	22/18888	0.0909091	13.2084	4.76969	0.0099234	0.0311276	0.0176254	PARP1/HIF1A	2
BP	GO:0038096	Fc-gamma receptor signaling pathway involved in phagocytosis	2/130	22/18888	0.0909091	13.2084	4.76969	0.0099234	0.0311276	0.0176254	PRKCD/ABL1	2
BP	GO:0046519	sphingoid metabolic process	2/130	22/18888	0.0909091	13.2084	4.76969	0.0099234	0.0311276	0.0176254	ASAH1/GBA1	2
BP	GO:0072111	cell proliferation involved in kidney development	2/130	22/18888	0.0909091	13.2084	4.76969	0.0099234	0.0311276	0.0176254	SHH/PDGFRB	2
BP	GO:0098801	regulation of renal system process	2/130	22/18888	0.0909091	13.2084	4.76969	0.0099234	0.0311276	0.0176254	F2R/ADORA1	2
BP	GO:1900273	positive regulation of long-term synaptic potentiation	2/130	22/18888	0.0909091	13.2084	4.76969	0.0099234	0.0311276	0.0176254	APP/ADORA2A	2
BP	GO:1902473	regulation of protein localization to synapse	2/130	22/18888	0.0909091	13.2084	4.76969	0.0099234	0.0311276	0.0176254	OGT/HRAS	2
BP	GO:2000831	regulation of steroid hormone secretion	2/130	22/18888	0.0909091	13.2084	4.76969	0.0099234	0.0311276	0.0176254	TSPO/CRHR1	2
BP	GO:0032640	tumor necrosis factor production	5/130	189/18888	0.026455	3.84371	3.2709	0.00996034	0.031164	0.0176461	APP/RAD21/JAK2/TSPO/LRRK2	5
BP	GO:0032680	regulation of tumor necrosis factor production	5/130	189/18888	0.026455	3.84371	3.2709	0.00996034	0.031164	0.0176461	APP/RAD21/JAK2/TSPO/LRRK2	5
BP	GO:0061136	regulation of proteasomal protein catabolic process	5/130	189/18888	0.026455	3.84371	3.2709	0.00996034	0.031164	0.0176461	OGT/SHH/GBA1/VCP/LRRK2	5
BP	GO:0006022	aminoglycan metabolic process	4/130	122/18888	0.0327869	4.76368	3.4719	0.0100787	0.031481	0.0178256	ST3GAL3/NAGLU/HEXA/HEXB	4
BP	GO:1904892	regulation of receptor signaling pathway via STAT	4/130	122/18888	0.0327869	4.76368	3.4719	0.0100787	0.031481	0.0178256	TNF/F2R/KIT/JAK2	4
BP	GO:0030098	lymphocyte differentiation	8/130	432/18888	0.0185185	2.6906	2.95919	0.0101175	0.0315754	0.017879	SHH/EZH2/KMT2A/GBA1/ACTB/KIT/RORA/ABL1	8
BP	GO:0060113	inner ear receptor cell differentiation	3/130	65/18888	0.0461538	6.7058	3.83609	0.0102013	0.0317832	0.0179966	NAGLU/FGFR1/GABRA5	3
BP	GO:0080164	regulation of nitric oxide metabolic process	3/130	65/18888	0.0461538	6.7058	3.83609	0.0102013	0.0317832	0.0179966	TNF/JAK2/TSPO	3
BP	GO:0071482	cellular response to light stimulus	4/130	123/18888	0.0325203	4.72495	3.45032	0.0103632	0.0322604	0.0182669	CERS1/PARP1/PRKCD/MAPK14	4
BP	GO:0006575	cellular modified amino acid metabolic process	5/130	191/18888	0.026178	3.80346	3.24179	0.0103918	0.032295	0.0182865	ATIC/GAMT/FOLH1/CTSK/CTSB	5
BP	GO:0097696	receptor signaling pathway via STAT	5/130	191/18888	0.026178	3.80346	3.24179	0.0103918	0.032295	0.0182865	NAGLU/TNF/F2R/KIT/JAK2	5
BP	GO:0006006	glucose metabolic process	5/130	192/18888	0.0260417	3.78365	3.22739	0.0106123	0.0328822	0.0186189	OGT/TNF/RORA/MAPK14/GCK	5
BP	GO:0001947	heart looping	3/130	66/18888	0.0454545	6.6042	3.79675	0.0106342	0.0328822	0.0186189	SHH/SMO/HIF1A	3
BP	GO:0042446	hormone biosynthetic process	3/130	66/18888	0.0454545	6.6042	3.79675	0.0106342	0.0328822	0.0186189	ADM/HIF1A/TSPO	3
BP	GO:0042531	positive regulation of tyrosine phosphorylation of STAT protein	3/130	66/18888	0.0454545	6.6042	3.79675	0.0106342	0.0328822	0.0186189	TNF/KIT/JAK2	3
BP	GO:0046530	photoreceptor cell differentiation	3/130	66/18888	0.0454545	6.6042	3.79675	0.0106342	0.0328822	0.0186189	NAGLU/VEGFA/RORB	3
BP	GO:0050994	regulation of lipid catabolic process	3/130	66/18888	0.0454545	6.6042	3.79675	0.0106342	0.0328822	0.0186189	TNF/PRKCD/ADORA1	3
BP	GO:0060828	regulation of canonical Wnt signaling pathway	6/130	268/18888	0.0223881	3.25281	3.09216	0.0106647	0.0329491	0.0186568	SHH/CDH2/EGFR/VCP/MAPK14/LRRK2	6
BP	GO:0003085	negative regulation of systemic arterial blood pressure	2/130	23/18888	0.0869565	12.6341	4.6476	0.0108199	0.0331236	0.0187556	TNF/ADORA1	2
BP	GO:0003283	atrial septum development	2/130	23/18888	0.0869565	12.6341	4.6476	0.0108199	0.0331236	0.0187556	NSD2/SMO	2
BP	GO:0006590	thyroid hormone generation	2/130	23/18888	0.0869565	12.6341	4.6476	0.0108199	0.0331236	0.0187556	CTSK/CTSB	2
BP	GO:0010893	positive regulation of steroid biosynthetic process	2/130	23/18888	0.0869565	12.6341	4.6476	0.0108199	0.0331236	0.0187556	ADM/TNF	2
BP	GO:0021542	dentate gyrus development	2/130	23/18888	0.0869565	12.6341	4.6476	0.0108199	0.0331236	0.0187556	POMGNT1/SMO	2
BP	GO:0046835	carbohydrate phosphorylation	2/130	23/18888	0.0869565	12.6341	4.6476	0.0108199	0.0331236	0.0187556	GNE/GCK	2
BP	GO:0050961	detection of temperature stimulus involved in sensory perception	2/130	23/18888	0.0869565	12.6341	4.6476	0.0108199	0.0331236	0.0187556	ADORA1/HTR2A	2
BP	GO:0061744	motor behavior	2/130	23/18888	0.0869565	12.6341	4.6476	0.0108199	0.0331236	0.0187556	NAGLU/GBA1	2
BP	GO:0097164	ammonium ion metabolic process	2/130	23/18888	0.0869565	12.6341	4.6476	0.0108199	0.0331236	0.0187556	HNMT/GRIN2A	2
BP	GO:0098664	G protein-coupled serotonin receptor signaling pathway	2/130	23/18888	0.0869565	12.6341	4.6476	0.0108199	0.0331236	0.0187556	HTR2C/HTR2A	2
BP	GO:1903579	negative regulation of ATP metabolic process	2/130	23/18888	0.0869565	12.6341	4.6476	0.0108199	0.0331236	0.0187556	PARP1/TSPO	2
BP	GO:0003007	heart morphogenesis	6/130	269/18888	0.0223048	3.24072	3.08138	0.0108481	0.0331826	0.018789	NSD2/SHH/NAGLU/VEGFA/SMO/HIF1A	6
BP	GO:0002824	positive regulation of adaptive immune response based on somatic recombination of immune receptors built from immunoglobulin superfamily domains	4/130	125/18888	0.032	4.64935	3.40784	0.0109476	0.0334314	0.0189299	NSD2/TNF/JAK2/P2RX7	4
BP	GO:0046632	alpha-beta T cell differentiation	4/130	125/18888	0.032	4.64935	3.40784	0.0109476	0.0334314	0.0189299	SHH/KMT2A/RORA/ABL1	4
BP	GO:0071706	tumor necrosis factor superfamily cytokine production	5/130	194/18888	0.0257732	3.74465	3.19887	0.0110628	0.0336336	0.0190444	APP/RAD21/JAK2/TSPO/LRRK2	5
BP	GO:1903555	regulation of tumor necrosis factor superfamily cytokine production	5/130	194/18888	0.0257732	3.74465	3.19887	0.0110628	0.0336336	0.0190444	APP/RAD21/JAK2/TSPO/LRRK2	5
BP	GO:0046888	negative regulation of hormone secretion	3/130	67/18888	0.0447761	6.50563	3.75822	0.0110776	0.0336336	0.0190444	FGF23/ADORA1/TSPO	3
BP	GO:0060675	ureteric bud morphogenesis	3/130	67/18888	0.0447761	6.50563	3.75822	0.0110776	0.0336336	0.0190444	SHH/VEGFA/SMO	3
BP	GO:0070301	cellular response to hydrogen peroxide	3/130	67/18888	0.0447761	6.50563	3.75822	0.0110776	0.0336336	0.0190444	EZH2/PRKCD/ABL1	3
BP	GO:0097192	extrinsic apoptotic signaling pathway in absence of ligand	3/130	67/18888	0.0447761	6.50563	3.75822	0.0110776	0.0336336	0.0190444	FGFR1/TNF/TERT	3
BP	GO:1905953	negative regulation of lipid localization	3/130	67/18888	0.0447761	6.50563	3.75822	0.0110776	0.0336336	0.0190444	SHH/TNF/TSPO	3
BP	GO:0006805	xenobiotic metabolic process	4/130	126/18888	0.031746	4.61245	3.38694	0.0112477	0.034038	0.0192734	GRIN1/NOS1/NAT2/RORA	4
BP	GO:0007613	memory	4/130	126/18888	0.031746	4.61245	3.38694	0.0112477	0.034038	0.0192734	GRIN2A/OXTR/HTR2A/CCND2	4
BP	GO:0008286	insulin receptor signaling pathway	4/130	126/18888	0.031746	4.61245	3.38694	0.0112477	0.034038	0.0192734	OGT/HRAS/PRKCD/RAF1	4
BP	GO:0072089	stem cell proliferation	4/130	126/18888	0.031746	4.61245	3.38694	0.0112477	0.034038	0.0192734	SHH/FGFR1/GBA1/TERT	4
BP	GO:0009755	hormone-mediated signaling pathway	5/130	196/18888	0.0255102	3.70644	3.17072	0.0115262	0.0347264	0.0196632	KMT2D/NCOR2/PARP1/AR/JAK2	5
BP	GO:0045664	regulation of neuron differentiation	5/130	196/18888	0.0255102	3.70644	3.17072	0.0115262	0.0347264	0.0196632	SHH/FGFR1/YWHAG/APP/LRRK2	5
BP	GO:0035019	somatic stem cell population maintenance	3/130	68/18888	0.0441176	6.40995	3.72047	0.0115316	0.0347264	0.0196632	KIT/SMO/RAF1	3
BP	GO:0045668	negative regulation of osteoblast differentiation	3/130	68/18888	0.0441176	6.40995	3.72047	0.0115316	0.0347264	0.0196632	TNF/FGF23/RORB	3
BP	GO:0072171	mesonephric tubule morphogenesis	3/130	68/18888	0.0441176	6.40995	3.72047	0.0115316	0.0347264	0.0196632	SHH/VEGFA/SMO	3
BP	GO:0072577	endothelial cell apoptotic process	3/130	68/18888	0.0441176	6.40995	3.72047	0.0115316	0.0347264	0.0196632	TNF/TERT/ABL1	3
BP	GO:0003206	cardiac chamber morphogenesis	4/130	127/18888	0.0314961	4.57614	3.36626	0.0115529	0.0347341	0.0196675	NSD2/NAGLU/SMO/HIF1A	4
BP	GO:0003231	cardiac ventricle development	4/130	127/18888	0.0314961	4.57614	3.36626	0.0115529	0.0347341	0.0196675	NSD2/NAGLU/HIF1A/SCN5A	4
BP	GO:0002082	regulation of oxidative phosphorylation	2/130	24/18888	0.0833333	12.1077	4.53286	0.0117508	0.034987	0.0198108	TNF/VCP	2
BP	GO:0002320	lymphoid progenitor cell differentiation	2/130	24/18888	0.0833333	12.1077	4.53286	0.0117508	0.034987	0.0198108	SHH/KIT	2
BP	GO:0003323	type B pancreatic cell development	2/130	24/18888	0.0833333	12.1077	4.53286	0.0117508	0.034987	0.0198108	CDH2/SMO	2
BP	GO:0021871	forebrain regionalization	2/130	24/18888	0.0833333	12.1077	4.53286	0.0117508	0.034987	0.0198108	SHH/ADGRG1	2
BP	GO:0023058	adaptation of signaling pathway	2/130	24/18888	0.0833333	12.1077	4.53286	0.0117508	0.034987	0.0198108	ADM/GRM5	2
BP	GO:0030539	male genitalia development	2/130	24/18888	0.0833333	12.1077	4.53286	0.0117508	0.034987	0.0198108	SHH/AR	2
BP	GO:0046885	regulation of hormone biosynthetic process	2/130	24/18888	0.0833333	12.1077	4.53286	0.0117508	0.034987	0.0198108	ADM/HIF1A	2
BP	GO:0051152	positive regulation of smooth muscle cell differentiation	2/130	24/18888	0.0833333	12.1077	4.53286	0.0117508	0.034987	0.0198108	SHH/KIT	2
BP	GO:0061042	vascular wound healing	2/130	24/18888	0.0833333	12.1077	4.53286	0.0117508	0.034987	0.0198108	TNF/VEGFA	2
BP	GO:0071294	cellular response to zinc ion	2/130	24/18888	0.0833333	12.1077	4.53286	0.0117508	0.034987	0.0198108	PARP1/TSPO	2
BP	GO:0097066	response to thyroid hormone	2/130	24/18888	0.0833333	12.1077	4.53286	0.0117508	0.034987	0.0198108	GBA1/CTSB	2
BP	GO:2001026	regulation of endothelial cell chemotaxis	2/130	24/18888	0.0833333	12.1077	4.53286	0.0117508	0.034987	0.0198108	FGFR1/VEGFA	2
BP	GO:0038034	signal transduction in absence of ligand	3/130	69/18888	0.0434783	6.31706	3.68347	0.0119962	0.0356601	0.0201918	FGFR1/TNF/TERT	3
BP	GO:0045911	positive regulation of DNA recombination	3/130	69/18888	0.0434783	6.31706	3.68347	0.0119962	0.0356601	0.0201918	NSD2/ACTB/PARP1	3
BP	GO:0046942	carboxylic acid transport	7/130	358/18888	0.0195531	2.84091	2.9275	0.0120232	0.0357116	0.020221	ABAT/TNF/SLC6A9/ABCG2/ADORA1/ADORA2A/P2RX7	7
BP	GO:0015849	organic acid transport	7/130	359/18888	0.0194986	2.833	2.91906	0.012194	0.0361898	0.0204918	ABAT/TNF/SLC6A9/ABCG2/ADORA1/ADORA2A/P2RX7	7
BP	GO:1903039	positive regulation of leukocyte cell-cell adhesion	6/130	277/18888	0.0216606	3.14713	2.9969	0.0123967	0.0367621	0.0208158	SHH/TNF/ACTB/ELANE/JAK2/ABL1	6
BP	GO:0032922	circadian regulation of gene expression	3/130	70/18888	0.0428571	6.22681	3.6472	0.0124714	0.0368355	0.0208574	OGT/KMT2A/RORA	3
BP	GO:0042490	mechanoreceptor differentiation	3/130	70/18888	0.0428571	6.22681	3.6472	0.0124714	0.0368355	0.0208574	NAGLU/FGFR1/GABRA5	3
BP	GO:0043627	response to estrogen	3/130	70/18888	0.0428571	6.22681	3.6472	0.0124714	0.0368355	0.0208574	KMT2D/GBA1/AR	3
BP	GO:0071479	cellular response to ionizing radiation	3/130	70/18888	0.0428571	6.22681	3.6472	0.0124714	0.0368355	0.0208574	HRAS/MAPK14/CCND2	3
BP	GO:2000573	positive regulation of DNA biosynthetic process	3/130	70/18888	0.0428571	6.22681	3.6472	0.0124714	0.0368355	0.0208574	HNRNPA1/TNF/PDGFRB	3
BP	GO:0042113	B cell activation	6/130	278/18888	0.0215827	3.13581	2.98656	0.0126007	0.0370861	0.0209993	NSD2/EZH2/KIT/PRKCD/CASP3/ABL1	6
BP	GO:0003071	renal system process involved in regulation of systemic arterial blood pressure	2/130	25/18888	0.08	11.6234	4.42474	0.0127156	0.0370861	0.0209993	F2R/ADORA1	2
BP	GO:0007190	activation of adenylate cyclase activity	2/130	25/18888	0.08	11.6234	4.42474	0.0127156	0.0370861	0.0209993	RAF1/CRHR1	2
BP	GO:0014856	skeletal muscle cell proliferation	2/130	25/18888	0.08	11.6234	4.42474	0.0127156	0.0370861	0.0209993	SHH/JAK2	2
BP	GO:0018022	peptidyl-lysine methylation	2/130	25/18888	0.08	11.6234	4.42474	0.0127156	0.0370861	0.0209993	EHMT1/SETD2	2
BP	GO:0035020	regulation of Rac protein signal transduction	2/130	25/18888	0.08	11.6234	4.42474	0.0127156	0.0370861	0.0209993	OGT/KRAS	2
BP	GO:0036315	cellular response to sterol	2/130	25/18888	0.08	11.6234	4.42474	0.0127156	0.0370861	0.0209993	SMO/RORA	2
BP	GO:0038095	Fc-epsilon receptor signaling pathway	2/130	25/18888	0.08	11.6234	4.42474	0.0127156	0.0370861	0.0209993	MAPK8/MAPK10	2
BP	GO:0042659	regulation of cell fate specification	2/130	25/18888	0.08	11.6234	4.42474	0.0127156	0.0370861	0.0209993	FGFR1/AR	2
BP	GO:0043576	regulation of respiratory gaseous exchange	2/130	25/18888	0.08	11.6234	4.42474	0.0127156	0.0370861	0.0209993	FTO/ADORA1	2
BP	GO:0048011	neurotrophin TRK receptor signaling pathway	2/130	25/18888	0.08	11.6234	4.42474	0.0127156	0.0370861	0.0209993	CASP3/RAF1	2
BP	GO:0090335	regulation of brown fat cell differentiation	2/130	25/18888	0.08	11.6234	4.42474	0.0127156	0.0370861	0.0209993	FTO/MAPK14	2
BP	GO:0099633	protein localization to postsynaptic specialization membrane	2/130	25/18888	0.08	11.6234	4.42474	0.0127156	0.0370861	0.0209993	OGT/HRAS	2
BP	GO:0099645	neurotransmitter receptor localization to postsynaptic specialization membrane	2/130	25/18888	0.08	11.6234	4.42474	0.0127156	0.0370861	0.0209993	OGT/HRAS	2
BP	GO:1902993	positive regulation of amyloid precursor protein catabolic process	2/130	25/18888	0.08	11.6234	4.42474	0.0127156	0.0370861	0.0209993	TNF/CASP3	2
BP	GO:0002696	positive regulation of leukocyte activation	7/130	362/18888	0.019337	2.80952	2.89392	0.012717	0.0370861	0.0209993	NSD2/SHH/TNF/ACTB/JAK2/ABL1/LRRK2	7
BP	GO:0002821	positive regulation of adaptive immune response	4/130	131/18888	0.0305344	4.43641	3.28563	0.0128273	0.0373488	0.0211481	NSD2/TNF/JAK2/P2RX7	4
BP	GO:0038127	ERBB signaling pathway	4/130	131/18888	0.0305344	4.43641	3.28563	0.0128273	0.0373488	0.0211481	EGFR/MAP2K1/RAF1/ABL1	4
BP	GO:0045600	positive regulation of fat cell differentiation	3/130	71/18888	0.0422535	6.13911	3.61162	0.0129573	0.0376383	0.021312	MAPK14/HTR2C/HTR2A	3
BP	GO:0061371	determination of heart left/right asymmetry	3/130	71/18888	0.0422535	6.13911	3.61162	0.0129573	0.0376383	0.021312	SHH/SMO/HIF1A	3
BP	GO:0071677	positive regulation of mononuclear cell migration	3/130	71/18888	0.0422535	6.13911	3.61162	0.0129573	0.0376383	0.021312	TNF/APP/ABL1	3
BP	GO:0009749	response to glucose	5/130	203/18888	0.0246305	3.57863	3.07504	0.0132521	0.0384454	0.021769	OGT/HIF1A/CASP3/RAF1/GCK	5
BP	GO:0010639	negative regulation of organelle organization	7/130	365/18888	0.0191781	2.78643	2.86904	0.013256	0.0384454	0.021769	HNRNPA1/NAA10/PARP1/RAD21/PRKCD/TSPO/LRRK2	7
BP	GO:0072594	establishment of protein localization to organelle	8/130	454/18888	0.0176211	2.56022	2.80132	0.0133379	0.0386526	0.0218863	SHH/SMO/PRKCD/MAPK14/JAK2/TSPO/TERT/LRRK2	8
BP	GO:0002067	glandular epithelial cell differentiation	3/130	72/18888	0.0416667	6.05385	3.57672	0.0134539	0.0388364	0.0219904	CDH2/SMO/HIF1A	3
BP	GO:0003143	embryonic heart tube morphogenesis	3/130	72/18888	0.0416667	6.05385	3.57672	0.0134539	0.0388364	0.0219904	SHH/SMO/HIF1A	3
BP	GO:0006487	protein N-linked glycosylation	3/130	72/18888	0.0416667	6.05385	3.57672	0.0134539	0.0388364	0.0219904	MGAT2/DPAGT1/B4GALT1	3
BP	GO:0010822	positive regulation of mitochondrion organization	3/130	72/18888	0.0416667	6.05385	3.57672	0.0134539	0.0388364	0.0219904	CERS1/HTT/HIF1A	3
BP	GO:0032722	positive regulation of chemokine production	3/130	72/18888	0.0416667	6.05385	3.57672	0.0134539	0.0388364	0.0219904	TNF/APP/HIF1A	3
BP	GO:0002244	hematopoietic progenitor cell differentiation	4/130	133/18888	0.0300752	4.36969	3.24652	0.0134968	0.0388387	0.0219917	SHH/SETD1A/KIT/ABL1	4
BP	GO:0014902	myotube differentiation	4/130	133/18888	0.0300752	4.36969	3.24652	0.0134968	0.0388387	0.0219917	NOS1/SHH/SMO/MAPK14	4
BP	GO:0043271	negative regulation of monoatomic ion transport	4/130	133/18888	0.0300752	4.36969	3.24652	0.0134968	0.0388387	0.0219917	NOS1/SLC6A9/HTR2A/CRHR1	4
BP	GO:0048593	camera-type eye morphogenesis	4/130	133/18888	0.0300752	4.36969	3.24652	0.0134968	0.0388387	0.0219917	NAGLU/VEGFA/HIF1A/RORB	4
BP	GO:0055001	muscle cell development	5/130	204/18888	0.0245098	3.56109	3.06171	0.0135121	0.0388527	0.0219996	NAGLU/ADM/VEGFA/PDGFRB/SMO	5
BP	GO:0002026	regulation of the force of heart contraction	2/130	26/18888	0.0769231	11.1763	4.32259	0.0137137	0.0390973	0.0221381	NOS1/ADM	2
BP	GO:0007202	activation of phospholipase C activity	2/130	26/18888	0.0769231	11.1763	4.32259	0.0137137	0.0390973	0.0221381	EGFR/HTR2A	2
BP	GO:0016048	detection of temperature stimulus	2/130	26/18888	0.0769231	11.1763	4.32259	0.0137137	0.0390973	0.0221381	ADORA1/HTR2A	2
BP	GO:0051894	positive regulation of focal adhesion assembly	2/130	26/18888	0.0769231	11.1763	4.32259	0.0137137	0.0390973	0.0221381	VEGFA/ABL1	2
BP	GO:0060333	type II interferon-mediated signaling pathway	2/130	26/18888	0.0769231	11.1763	4.32259	0.0137137	0.0390973	0.0221381	JAK2/RAF1	2
BP	GO:0060740	prostate gland epithelium morphogenesis	2/130	26/18888	0.0769231	11.1763	4.32259	0.0137137	0.0390973	0.0221381	SHH/AR	2
BP	GO:1900543	negative regulation of purine nucleotide metabolic process	2/130	26/18888	0.0769231	11.1763	4.32259	0.0137137	0.0390973	0.0221381	PARP1/TSPO	2
BP	GO:1903421	regulation of synaptic vesicle recycling	2/130	26/18888	0.0769231	11.1763	4.32259	0.0137137	0.0390973	0.0221381	ACTB/LRRK2	2
BP	GO:1904996	positive regulation of leukocyte adhesion to vascular endothelial cell	2/130	26/18888	0.0769231	11.1763	4.32259	0.0137137	0.0390973	0.0221381	TNF/ELANE	2
BP	GO:2000272	negative regulation of signaling receptor activity	2/130	26/18888	0.0769231	11.1763	4.32259	0.0137137	0.0390973	0.0221381	TNF/SLC6A9	2
BP	GO:2000773	negative regulation of cellular senescence	2/130	26/18888	0.0769231	11.1763	4.32259	0.0137137	0.0390973	0.0221381	TERT/ABL1	2
BP	GO:0006801	superoxide metabolic process	3/130	73/18888	0.0410959	5.97092	3.54247	0.0139612	0.0396804	0.0224683	NAGLU/PRKCD/EGFR	3
BP	GO:0045661	regulation of myoblast differentiation	3/130	73/18888	0.0410959	5.97092	3.54247	0.0139612	0.0396804	0.0224683	TNF/ACTB/MAPK14	3
BP	GO:0071260	cellular response to mechanical stimulus	3/130	73/18888	0.0410959	5.97092	3.54247	0.0139612	0.0396804	0.0224683	MAPK8/EGFR/CASP1	3
BP	GO:2000036	regulation of stem cell population maintenance	3/130	73/18888	0.0410959	5.97092	3.54247	0.0139612	0.0396804	0.0224683	OGT/ACTB/SMO	3
BP	GO:0006836	neurotransmitter transport	5/130	206/18888	0.0242718	3.52651	3.03531	0.0140425	0.0398501	0.0225644	NOS1/SLC6A9/ADORA2A/P2RX7/LRRK2	5
BP	GO:0071674	mononuclear cell migration	5/130	206/18888	0.0242718	3.52651	3.03531	0.0140425	0.0398501	0.0225644	GBA1/TNF/APP/FLT1/ABL1	5
BP	GO:0006354	DNA-templated transcription elongation	4/130	135/18888	0.0296296	4.30496	3.20817	0.0141881	0.0401707	0.0227459	SHH/EZH2/SETD2/PARP1	4
BP	GO:0038061	non-canonical NF-kappaB signal transduction	4/130	135/18888	0.0296296	4.30496	3.20817	0.0141881	0.0401707	0.0227459	TNF/APP/EGFR/VCP	4
BP	GO:0045814	negative regulation of gene expression, epigenetic	4/130	135/18888	0.0296296	4.30496	3.20817	0.0141881	0.0401707	0.0227459	KMT2D/EZH2/EHMT1/KMT2A	4
BP	GO:0043542	endothelial cell migration	6/130	286/18888	0.020979	3.04809	2.90544	0.0143181	0.0405076	0.0229367	FGFR1/TNF/VEGFA/HIF1A/PRKCA/ABL1	6
BP	GO:0050795	regulation of behavior	3/130	74/18888	0.0405405	5.89023	3.50885	0.0144793	0.0409324	0.0231772	PARP1/ADORA1/ADORA2A	3
BP	GO:0000086	G2/M transition of mitotic cell cycle	4/130	136/18888	0.0294118	4.2733	3.18927	0.0145421	0.0410784	0.0232599	APP/RAD21/CCND1/CDK4	4
BP	GO:0021846	cell proliferation in forebrain	2/130	27/18888	0.0740741	10.7624	4.22587	0.0147448	0.0413975	0.0234405	FGFR1/POU3F2	2
BP	GO:0035929	steroid hormone secretion	2/130	27/18888	0.0740741	10.7624	4.22587	0.0147448	0.0413975	0.0234405	TSPO/CRHR1	2
BP	GO:0045940	positive regulation of steroid metabolic process	2/130	27/18888	0.0740741	10.7624	4.22587	0.0147448	0.0413975	0.0234405	ADM/TNF	2
BP	GO:0045980	negative regulation of nucleotide metabolic process	2/130	27/18888	0.0740741	10.7624	4.22587	0.0147448	0.0413975	0.0234405	PARP1/TSPO	2
BP	GO:0048745	smooth muscle tissue development	2/130	27/18888	0.0740741	10.7624	4.22587	0.0147448	0.0413975	0.0234405	SHH/SMO	2
BP	GO:0050996	positive regulation of lipid catabolic process	2/130	27/18888	0.0740741	10.7624	4.22587	0.0147448	0.0413975	0.0234405	PRKCD/ADORA1	2
BP	GO:0060669	embryonic placenta morphogenesis	2/130	27/18888	0.0740741	10.7624	4.22587	0.0147448	0.0413975	0.0234405	SETD2/ADM	2
BP	GO:0071549	cellular response to dexamethasone stimulus	2/130	27/18888	0.0740741	10.7624	4.22587	0.0147448	0.0413975	0.0234405	EGFR/JAK2	2
BP	GO:0007548	sex differentiation	6/130	288/18888	0.0208333	3.02692	2.88561	0.0147718	0.0414418	0.0234656	SHH/ADGRG1/VEGFA/KIT/AR/CASP3	6
BP	GO:0045165	cell fate commitment	6/130	289/18888	0.0207612	3.01645	2.87575	0.0150023	0.0420414	0.0238051	SHH/FGFR1/POU3F2/SMO/AR/CASP3	6
BP	GO:1901019	regulation of calcium ion transmembrane transporter activity	3/130	75/18888	0.04	5.81169	3.47584	0.0150083	0.0420414	0.0238051	NOS1/HTT/CRHR1	3
BP	GO:0010631	epithelial cell migration	7/130	375/18888	0.0186667	2.71212	2.78787	0.0151716	0.0424666	0.0240459	FGFR1/TNF/VEGFA/KIT/HIF1A/PRKCA/ABL1	7
BP	GO:0030048	actin filament-based movement	4/130	138/18888	0.0289855	4.21137	3.15202	0.0152667	0.0426037	0.0241235	SCN4A/ADORA1/PDE4B/SCN5A	4
BP	GO:0046328	regulation of JNK cascade	4/130	138/18888	0.0289855	4.21137	3.15202	0.0152667	0.0426037	0.0241235	HRAS/TNF/APP/EGFR	4
BP	GO:0061041	regulation of wound healing	4/130	138/18888	0.0289855	4.21137	3.15202	0.0152667	0.0426037	0.0241235	HRAS/TNF/F2R/PRKCD	4
BP	GO:0070555	response to interleukin-1	4/130	138/18888	0.0289855	4.21137	3.15202	0.0152667	0.0426037	0.0241235	APP/HIF1A/PRKCA/RORA	4
BP	GO:0051057	positive regulation of small GTPase mediated signal transduction	3/130	76/18888	0.0394737	5.73522	3.44342	0.015548	0.0433559	0.0245495	KRAS/ADGRG1/F2R	3
BP	GO:0090132	epithelium migration	7/130	378/18888	0.0185185	2.6906	2.76403	0.0157829	0.043751	0.0247732	FGFR1/TNF/VEGFA/KIT/HIF1A/PRKCA/ABL1	7
BP	GO:0006027	glycosaminoglycan catabolic process	2/130	28/18888	0.0714286	10.378	4.13408	0.0158082	0.043751	0.0247732	HEXA/HEXB	2
BP	GO:0006760	folic acid-containing compound metabolic process	2/130	28/18888	0.0714286	10.378	4.13408	0.0158082	0.043751	0.0247732	ATIC/FOLH1	2
BP	GO:0006817	phosphate ion transport	2/130	28/18888	0.0714286	10.378	4.13408	0.0158082	0.043751	0.0247732	FGFR1/FGF23	2
BP	GO:0010039	response to iron ion	2/130	28/18888	0.0714286	10.378	4.13408	0.0158082	0.043751	0.0247732	ABAT/HIF1A	2
BP	GO:0010165	response to X-ray	2/130	28/18888	0.0714286	10.378	4.13408	0.0158082	0.043751	0.0247732	CASP3/CCND2	2
BP	GO:0030325	adrenal gland development	2/130	28/18888	0.0714286	10.378	4.13408	0.0158082	0.043751	0.0247732	TSPO/CRHR1	2
BP	GO:0050995	negative regulation of lipid catabolic process	2/130	28/18888	0.0714286	10.378	4.13408	0.0158082	0.043751	0.0247732	TNF/ADORA1	2
BP	GO:0060512	prostate gland morphogenesis	2/130	28/18888	0.0714286	10.378	4.13408	0.0158082	0.043751	0.0247732	SHH/AR	2
BP	GO:1904357	negative regulation of telomere maintenance via telomere lengthening	2/130	28/18888	0.0714286	10.378	4.13408	0.0158082	0.043751	0.0247732	HNRNPA1/PARP1	2
BP	GO:0042098	T cell proliferation	5/130	213/18888	0.0234742	3.41062	2.94542	0.0160089	0.0442401	0.0250501	SHH/CASP3/JAK2/P2RX7/ABL1	5
BP	GO:0051348	negative regulation of transferase activity	5/130	213/18888	0.0234742	3.41062	2.94542	0.0160089	0.0442401	0.0250501	CERS1/GBA1/YWHAG/PRKCD/ABL1	5
BP	GO:0007585	respiratory gaseous exchange by respiratory system	3/130	77/18888	0.038961	5.66074	3.41157	0.0160986	0.0443552	0.0251153	HNMT/FTO/ADORA1	3
BP	GO:0031016	pancreas development	3/130	77/18888	0.038961	5.66074	3.41157	0.0160986	0.0443552	0.0251153	SHH/CDH2/SMO	3
BP	GO:0032436	positive regulation of proteasomal ubiquitin-dependent protein catabolic process	3/130	77/18888	0.038961	5.66074	3.41157	0.0160986	0.0443552	0.0251153	GBA1/VCP/LRRK2	3
BP	GO:0072078	nephron tubule morphogenesis	3/130	77/18888	0.038961	5.66074	3.41157	0.0160986	0.0443552	0.0251153	SHH/VEGFA/SMO	3
BP	GO:0050867	positive regulation of cell activation	7/130	380/18888	0.0184211	2.67644	2.74827	0.0162001	0.0446016	0.0252548	NSD2/SHH/TNF/ACTB/JAK2/ABL1/LRRK2	7
BP	GO:0010827	regulation of glucose transmembrane transport	3/130	78/18888	0.0384615	5.58817	3.38027	0.01666	0.0456636	0.0258562	TNF/MAPK14/TERT	3
BP	GO:0031397	negative regulation of protein ubiquitination	3/130	78/18888	0.0384615	5.58817	3.38027	0.01666	0.0456636	0.0258562	OGT/TSPO/ABL1	3
BP	GO:0035418	protein localization to synapse	3/130	78/18888	0.0384615	5.58817	3.38027	0.01666	0.0456636	0.0258562	OGT/HRAS/GRIN2A	3
BP	GO:0042509	regulation of tyrosine phosphorylation of STAT protein	3/130	78/18888	0.0384615	5.58817	3.38027	0.01666	0.0456636	0.0258562	TNF/KIT/JAK2	3
BP	GO:0046323	glucose import	3/130	78/18888	0.0384615	5.58817	3.38027	0.01666	0.0456636	0.0258562	TNF/MAPK14/TERT	3
BP	GO:0050772	positive regulation of axonogenesis	3/130	78/18888	0.0384615	5.58817	3.38027	0.01666	0.0456636	0.0258562	L1CAM/VEGFA/MAP2K1	3
BP	GO:0001933	negative regulation of protein phosphorylation	6/130	296/18888	0.0202703	2.94511	2.80794	0.0166867	0.0457027	0.0258783	GBA1/YWHAG/SMO/PRKCD/ABL1/LRRK2	6
BP	GO:0034341	response to type II interferon	4/130	142/18888	0.028169	4.09274	3.07959	0.0167834	0.0458881	0.0259833	TNF/JAK2/CASP1/RAF1	4
BP	GO:0051053	negative regulation of DNA metabolic process	4/130	142/18888	0.028169	4.09274	3.07959	0.0167834	0.0458881	0.0259833	CERS1/HNRNPA1/PARP1/ABL1	4
BP	GO:0090130	tissue migration	7/130	383/18888	0.0182768	2.65547	2.72481	0.0168405	0.0458881	0.0259833	FGFR1/TNF/VEGFA/KIT/HIF1A/PRKCA/ABL1	7
BP	GO:0003094	glomerular filtration	2/130	29/18888	0.0689655	10.0202	4.04682	0.0169035	0.0458881	0.0259833	F2R/ADORA1	2
BP	GO:0003209	cardiac atrium morphogenesis	2/130	29/18888	0.0689655	10.0202	4.04682	0.0169035	0.0458881	0.0259833	NSD2/SMO	2
BP	GO:0003309	type B pancreatic cell differentiation	2/130	29/18888	0.0689655	10.0202	4.04682	0.0169035	0.0458881	0.0259833	CDH2/SMO	2
BP	GO:0022011	myelination in peripheral nervous system	2/130	29/18888	0.0689655	10.0202	4.04682	0.0169035	0.0458881	0.0259833	POU3F2/NDRG1	2
BP	GO:0032292	peripheral nervous system axon ensheathment	2/130	29/18888	0.0689655	10.0202	4.04682	0.0169035	0.0458881	0.0259833	POU3F2/NDRG1	2
BP	GO:0042403	thyroid hormone metabolic process	2/130	29/18888	0.0689655	10.0202	4.04682	0.0169035	0.0458881	0.0259833	CTSK/CTSB	2
BP	GO:0050951	sensory perception of temperature stimulus	2/130	29/18888	0.0689655	10.0202	4.04682	0.0169035	0.0458881	0.0259833	ADORA1/HTR2A	2
BP	GO:0051291	protein heterooligomerization	2/130	29/18888	0.0689655	10.0202	4.04682	0.0169035	0.0458881	0.0259833	GRIN2B/GRIN1	2
BP	GO:2000273	positive regulation of signaling receptor activity	2/130	29/18888	0.0689655	10.0202	4.04682	0.0169035	0.0458881	0.0259833	HIF1A/JAK2	2
BP	GO:0048562	embryonic organ morphogenesis	6/130	297/18888	0.020202	2.9352	2.79842	0.0169375	0.0459467	0.0260164	SHH/NAGLU/FGFR1/SETD2/SMO/HIF1A	6
BP	GO:0010632	regulation of epithelial cell migration	6/130	298/18888	0.0201342	2.92535	2.78893	0.017191	0.0465999	0.0263863	FGFR1/TNF/VEGFA/HIF1A/PRKCA/ABL1	6
BP	GO:0016239	positive regulation of macroautophagy	3/130	79/18888	0.0379747	5.51743	3.34952	0.0172324	0.0466436	0.0264111	CERS1/HTT/HIF1A	3
BP	GO:0072088	nephron epithelium morphogenesis	3/130	79/18888	0.0379747	5.51743	3.34952	0.0172324	0.0466436	0.0264111	SHH/VEGFA/SMO	3
BP	GO:0002460	adaptive immune response based on somatic recombination of immune receptors built from immunoglobulin superfamily domains	7/130	385/18888	0.0181818	2.64168	2.7093	0.0172773	0.0466967	0.0264411	NSD2/HRAS/TNF/PRKCD/RORA/JAK2/P2RX7	7
BP	GO:0032970	regulation of actin filament-based process	7/130	385/18888	0.0181818	2.64168	2.7093	0.0172773	0.0466967	0.0264411	HRAS/PDGFRB/PRKCD/ADORA1/PDE4B/SCN5A/ABL1	7
BP	GO:0034763	negative regulation of transmembrane transport	4/130	144/18888	0.0277778	4.0359	3.04437	0.0175758	0.0474689	0.0268784	NOS1/TNF/SLC6A9/CRHR1	4
BP	GO:0021536	diencephalon development	3/130	80/18888	0.0375	5.44846	3.31928	0.0178156	0.0480813	0.0272251	SHH/POU3F2/SMO	3
BP	GO:0002366	leukocyte activation involved in immune response	6/130	301/18888	0.0199336	2.89619	2.76071	0.017967	0.0483777	0.027393	NSD2/KMT2A/TNF/KIT/RORA/ABL1	6
BP	GO:0032006	regulation of TOR signaling	4/130	145/18888	0.0275862	4.00806	3.02699	0.0179807	0.0483777	0.027393	OGT/GBA1/YWHAG/HIF1A	4
BP	GO:0008209	androgen metabolic process	2/130	30/18888	0.0666667	9.68615	3.9637	0.0180303	0.0483777	0.027393	SHH/ADM	2
BP	GO:0038094	Fc-gamma receptor signaling pathway	2/130	30/18888	0.0666667	9.68615	3.9637	0.0180303	0.0483777	0.027393	PRKCD/ABL1	2
BP	GO:0043392	negative regulation of DNA binding	2/130	30/18888	0.0666667	9.68615	3.9637	0.0180303	0.0483777	0.027393	SMO/JAK2	2
BP	GO:0045762	positive regulation of adenylate cyclase activity	2/130	30/18888	0.0666667	9.68615	3.9637	0.0180303	0.0483777	0.027393	RAF1/CRHR1	2
BP	GO:0070168	negative regulation of biomineral tissue development	2/130	30/18888	0.0666667	9.68615	3.9637	0.0180303	0.0483777	0.027393	FGF23/HIF1A	2
BP	GO:1900017	positive regulation of cytokine production involved in inflammatory response	2/130	30/18888	0.0666667	9.68615	3.9637	0.0180303	0.0483777	0.027393	TNF/HIF1A	2
BP	GO:0040029	epigenetic regulation of gene expression	5/130	220/18888	0.0227273	3.3021	2.85921	0.0181512	0.0486667	0.0275566	KMT2D/PRMT7/EZH2/EHMT1/KMT2A	5
BP	GO:0071560	cellular response to transforming growth factor beta stimulus	6/130	302/18888	0.0198675	2.8866	2.75138	0.0182309	0.0488452	0.0276577	PRDM16/OGT/KMT2A/PARP1/CTSK/ABL1	6
BP	GO:0007224	smoothened signaling pathway	4/130	146/18888	0.0273973	3.98061	3.00977	0.0183913	0.0491815	0.0278481	SHH/SMO/RORA/VCP	4
BP	GO:0048844	artery morphogenesis	3/130	81/18888	0.037037	5.3812	3.28954	0.0184098	0.0491815	0.0278481	NAGLU/VEGFA/PDGFRB	3
BP	GO:0061333	renal tubule morphogenesis	3/130	81/18888	0.037037	5.3812	3.28954	0.0184098	0.0491815	0.0278481	SHH/VEGFA/SMO	3
BP	GO:0072028	nephron morphogenesis	3/130	81/18888	0.037037	5.3812	3.28954	0.0184098	0.0491815	0.0278481	SHH/VEGFA/SMO	3
CC	GO:0045211	postsynaptic membrane	17/130	276/19894	0.0615942	9.42581	11.432	3.19829e-12	9.49893e-10	6.46392e-10	GRIN2B/GRIN1/GRIN3A/GRIN2D/GRIN2A/F2R/GABRB3/GABRA3/GABRG2/GABRA1/GABRA5/GABRA2/GRM5/SLC6A9/ADORA1/ADORA2A/HTR2A	17
CC	GO:0005775	vacuolar lumen	13/130	176/19894	0.0738636	11.3034	11.135	1.38661e-10	2.05912e-08	1.40121e-08	ASAH1/NEU1/NAGLU/AGRN/GBA1/HEXA/HEXB/PDGFRB/ELANE/PRKCD/CTSK/VCP/CTSB	13
CC	GO:0043202	lysosomal lumen	10/130	98/19894	0.102041	15.6154	11.763	8.61229e-10	5.55446e-08	3.77975e-08	ASAH1/NEU1/NAGLU/AGRN/GBA1/HEXA/HEXB/PDGFRB/CTSK/CTSB	10
CC	GO:0034702	monoatomic ion channel complex	16/130	344/19894	0.0465116	7.11771	9.2828	9.21255e-10	5.55446e-08	3.77975e-08	GRIN2B/GRIN1/PORCN/GRIN3A/CACNA1B/GRIN2D/GRIN2A/GABRB3/GABRA3/GABRG2/GABRA1/GABRA5/GABRA2/SCN4A/PDE4B/SCN5A	16
CC	GO:0097060	synaptic membrane	17/130	397/19894	0.0428212	6.55295	9.064	9.35093e-10	5.55446e-08	3.77975e-08	GRIN2B/GRIN1/GRIN3A/GRIN2D/GRIN2A/F2R/GABRB3/GABRA3/GABRG2/GABRA1/GABRA5/GABRA2/GRM5/SLC6A9/ADORA1/ADORA2A/HTR2A	17
CC	GO:1902711	GABA-A receptor complex	6/130	19/19894	0.315789	48.3255	16.738	1.75413e-09	8.68297e-08	5.90866e-08	GABRB3/GABRA3/GABRG2/GABRA1/GABRA5/GABRA2	6
CC	GO:1902710	GABA receptor complex	6/130	21/19894	0.285714	43.7231	15.8864	3.47091e-09	1.47266e-07	1.00213e-07	GABRB3/GABRA3/GABRG2/GABRA1/GABRA5/GABRA2	6
CC	GO:0045121	membrane raft	14/130	286/19894	0.048951	7.49102	8.96734	5.77226e-09	1.99156e-07	1.35524e-07	NOS1/SHH/ADGRG1/TNF/CDH2/APP/F2R/SMO/EGFR/ABCG2/JAK2/HTR2A/SCN5A/LRRK2	14
CC	GO:0098857	membrane microdomain	14/130	287/19894	0.0487805	7.46492	8.94711	6.03504e-09	1.99156e-07	1.35524e-07	NOS1/SHH/ADGRG1/TNF/CDH2/APP/F2R/SMO/EGFR/ABCG2/JAK2/HTR2A/SCN5A/LRRK2	14
CC	GO:1902495	transmembrane transporter complex	16/130	444/19894	0.036036	5.51462	7.80257	3.42958e-08	1.01859e-06	6.93137e-07	GRIN2B/GRIN1/PORCN/GRIN3A/CACNA1B/GRIN2D/GRIN2A/GABRB3/GABRA3/GABRG2/GABRA1/GABRA5/GABRA2/SCN4A/PDE4B/SCN5A	16
CC	GO:1990351	transporter complex	16/130	471/19894	0.0339703	5.1985	7.47878	7.72937e-08	2.08693e-06	1.42013e-06	GRIN2B/GRIN1/PORCN/GRIN3A/CACNA1B/GRIN2D/GRIN2A/GABRB3/GABRA3/GABRG2/GABRA1/GABRA5/GABRA2/SCN4A/PDE4B/SCN5A	16
CC	GO:0032589	neuron projection membrane	7/130	60/19894	0.116667	17.8536	10.6035	1.2523e-07	3.09944e-06	2.10914e-06	GABRA3/GABRG2/GABRA1/GABRA5/GABRA2/ADORA1/ADORA2A	7
CC	GO:0032279	asymmetric synapse	13/130	329/19894	0.0395137	6.04681	7.48616	2.51911e-07	5.48225e-06	3.73061e-06	GRIN2B/GRIN1/NOS1/GRIN3A/HNRNPH2/GRIN2D/CDH2/GRIN2A/GRM5/SLC6A9/ADORA1/ADORA2A/PDE4B	13
CC	GO:0008328	ionotropic glutamate receptor complex	6/130	41/19894	0.146341	22.3947	11.1217	2.58423e-07	5.48225e-06	3.73061e-06	GRIN2B/GRIN1/PORCN/GRIN3A/GRIN2D/GRIN2A	6
CC	GO:0099572	postsynaptic specialization	13/130	341/19894	0.0381232	5.83402	7.30236	3.78904e-07	7.50229e-06	5.10523e-06	GRIN2B/GRIN1/NOS1/GRIN3A/HNRNPH2/GRIN2D/CDH2/GRIN2A/GABRA5/GABRA2/GRM5/SLC6A9/PDE4B	13
CC	GO:0098978	glutamatergic synapse	14/130	409/19894	0.0342298	5.23822	7.02391	4.84665e-07	8.99659e-06	6.12208e-06	OGT/PORCN/GRIN3A/HRAS/GRIN2D/ACTB/GRIN2A/GRM5/VCP/ADORA2A/MAPK14/JAK2/HTR2A/LRRK2	14
CC	GO:0098878	neurotransmitter receptor complex	6/130	46/19894	0.130435	19.9605	10.4413	5.24148e-07	9.15717e-06	6.23135e-06	GRIN2B/GRIN1/PORCN/GRIN3A/GRIN2D/GRIN2A	6
CC	GO:0098984	neuron to neuron synapse	13/130	360/19894	0.0361111	5.52611	7.02854	6.99173e-07	1.15364e-05	7.85036e-06	GRIN2B/GRIN1/NOS1/GRIN3A/HNRNPH2/GRIN2D/CDH2/GRIN2A/GRM5/SLC6A9/ADORA1/ADORA2A/PDE4B	13
CC	GO:0034707	chloride channel complex	6/130	56/19894	0.107143	16.3962	9.35711	1.72236e-06	2.69233e-05	1.8321e-05	GABRB3/GABRA3/GABRG2/GABRA1/GABRA5/GABRA2	6
CC	GO:0031256	leading edge membrane	9/130	179/19894	0.0502793	7.69428	7.29654	2.73506e-06	4.06156e-05	2.76385e-05	GABRA3/GABRG2/GABRA1/GABRA5/GABRA2/EGFR/ADORA1/ADORA2A/PDE4A	9
CC	GO:0031253	cell projection membrane	12/130	354/19894	0.0338983	5.18748	6.44729	3.67467e-06	5.19703e-05	3.53652e-05	B4GALT1/SMO/GABRA3/GABRG2/GABRA1/GABRA5/GABRA2/EGFR/ABCG2/ADORA1/ADORA2A/PDE4A	12
CC	GO:0043025	neuronal cell body	14/130	488/19894	0.0286885	4.39023	6.14972	3.85747e-06	5.20758e-05	3.5437e-05	L1CAM/GRIN3A/CACNA1B/TNF/APP/GABRA5/GABRA2/CASP3/ADORA1/ADORA2A/HTR2A/P2RX7/ABL1/LRRK2	14
CC	GO:0032590	dendrite membrane	5/130	40/19894	0.125	19.1288	9.30809	6.04068e-06	7.80036e-05	5.30806e-05	GABRA3/GABRG2/GABRA1/GABRA5/GABRA2	5
CC	GO:0035097	histone methyltransferase complex	6/130	70/19894	0.0857143	13.1169	8.23626	6.45462e-06	7.9876e-05	5.43547e-05	KMT2D/EZH2/KMT2A/SETD1A/SETD1B/KMT2C	6
CC	GO:0014069	postsynaptic density	11/130	313/19894	0.0351438	5.37808	6.33173	6.76692e-06	8.0391e-05	5.47052e-05	GRIN2B/GRIN1/NOS1/GRIN3A/HNRNPH2/GRIN2D/CDH2/GRIN2A/GRM5/SLC6A9/PDE4B	11
CC	GO:0044853	plasma membrane raft	7/130	113/19894	0.0619469	9.47978	7.33135	9.40267e-06	0.000107407	7.30896e-05	CDH2/F2R/SMO/JAK2/HTR2A/SCN5A/LRRK2	7
CC	GO:0099634	postsynaptic specialization membrane	7/130	120/19894	0.0583333	8.92679	7.06359	1.3946e-05	0.000153406	0.000104391	GRIN2B/GRIN3A/GRIN2D/GRIN2A/GABRA5/GABRA2/GRM5	7
CC	GO:0005901	caveola	6/130	82/19894	0.0731707	11.1974	7.50439	1.61696e-05	0.000171513	0.000116713	F2R/SMO/JAK2/HTR2A/SCN5A/LRRK2	6
CC	GO:0031252	cell leading edge	12/130	426/19894	0.028169	4.31073	5.60211	2.3537e-05	0.000241051	0.000164033	ACTB/CDH2/GABRA3/GABRG2/GABRA1/GABRA5/GABRA2/EGFR/ADORA1/ADORA2A/PDE4A/ABL1	12
CC	GO:0034708	methyltransferase complex	6/130	100/19894	0.06	9.18185	6.65226	5.00148e-05	0.000495146	0.000336942	KMT2D/EZH2/KMT2A/SETD1A/SETD1B/KMT2C	6
CC	GO:0008021	synaptic vesicle	8/130	216/19894	0.037037	5.66781	5.59414	8.86425e-05	0.000849252	0.000577907	GRIN1/APP/GRIN2A/GABRA2/SLC6A9/PDE4B/KCNK9/LRRK2	8
CC	GO:0031904	endosome lumen	4/130	38/19894	0.105263	16.1085	7.56052	0.000108175	0.001004	0.00068321	APP/CTSK/JAK2/CTSB	4
CC	GO:0042734	presynaptic membrane	7/130	167/19894	0.0419162	6.41446	5.69859	0.000115145	0.0010363	0.000705194	GRIN2D/GRIN2A/GABRA5/SLC6A9/ADORA1/ADORA2A/HTR2A	7
CC	GO:0043197	dendritic spine	7/130	171/19894	0.0409357	6.26442	5.6072	0.000133402	0.00116531	0.000792979	GRIN1/NOS1/APP/GRIN2A/GRM5/ADORA1/PDE4B	7
CC	GO:0044309	neuron spine	7/130	173/19894	0.0404624	6.192	5.56259	0.000143374	0.00121663	0.000827906	GRIN1/NOS1/APP/GRIN2A/GRM5/ADORA1/PDE4B	7
CC	GO:0070382	exocytic vesicle	8/130	235/19894	0.0340426	5.20956	5.26471	0.000158636	0.00130875	0.000890588	GRIN1/APP/GRIN2A/GABRA2/SLC6A9/PDE4B/KCNK9/LRRK2	8
CC	GO:0031983	vesicle lumen	9/130	326/19894	0.0276074	4.22478	4.76123	0.00029617	0.00237737	0.00161777	NEU1/HEXB/APP/VEGFA/ELANE/PRKCD/EGFR/VCP/MAPK14	9
CC	GO:0005925	focal adhesion	10/130	421/19894	0.023753	3.63494	4.43179	0.000451511	0.00352891	0.00240139	L1CAM/KRAS/YWHAG/ACTB/CDH2/FLT1/PDGFRB/EGFR/JAK2/MAP2K1	10
CC	GO:0098839	postsynaptic density membrane	5/130	99/19894	0.0505051	7.72883	5.44332	0.000482761	0.00367641	0.00250176	GRIN2B/GRIN3A/GRIN2D/GRIN2A/GRM5	5
CC	GO:0030055	cell-substrate junction	10/130	431/19894	0.0232019	3.5506	4.3417	0.000541906	0.00386925	0.00263298	L1CAM/KRAS/YWHAG/ACTB/CDH2/FLT1/PDGFRB/EGFR/JAK2/MAP2K1	10
CC	GO:0005766	primary lysosome	6/130	155/19894	0.0387097	5.92377	4.99098	0.000547166	0.00386925	0.00263298	B4GALT1/HEXA/HEXB/ELANE/PRKCD/VCP	6
CC	GO:0042582	azurophil granule	6/130	155/19894	0.0387097	5.92377	4.99098	0.000547166	0.00386925	0.00263298	B4GALT1/HEXA/HEXB/ELANE/PRKCD/VCP	6
CC	GO:0036019	endolysosome	3/130	29/19894	0.103448	15.8308	6.48191	0.000879837	0.00607702	0.00413534	PRKCD/CTSK/CTSB	3
CC	GO:0034774	secretory granule lumen	8/130	322/19894	0.0248447	3.80201	4.11116	0.00127134	0.00858152	0.00583963	NEU1/HEXB/APP/VEGFA/ELANE/PRKCD/VCP/MAPK14	8
CC	GO:0060205	cytoplasmic vesicle lumen	8/130	325/19894	0.0246154	3.76691	4.07884	0.00134832	0.00889888	0.00605559	NEU1/HEXB/APP/VEGFA/ELANE/PRKCD/VCP/MAPK14	8
CC	GO:0017053	transcription repressor complex	4/130	77/19894	0.0519481	7.94965	4.95534	0.00162977	0.0102988	0.00700819	PRDM16/NCOR2/ELANE/CCND1	4
CC	GO:0048786	presynaptic active zone	4/130	77/19894	0.0519481	7.94965	4.95534	0.00162977	0.0102988	0.00700819	GRIN2D/APP/ADORA1/ADORA2A	4
CC	GO:0098982	GABA-ergic synapse	4/130	79/19894	0.0506329	7.74839	4.87418	0.00179143	0.0110845	0.00754288	GABRG2/GABRA1/GABRA5/GABRA2	4
CC	GO:0150034	distal axon	7/130	272/19894	0.0257353	3.93829	3.95724	0.00209454	0.0124639	0.00848157	L1CAM/GRIN1/ACTB/APP/ADORA1/ABL1/LRRK2	7
CC	GO:0043198	dendritic shaft	3/130	39/19894	0.0769231	11.7716	5.46087	0.00209831	0.0124639	0.00848157	APP/GRM5/HTR2A	3
CC	GO:1904090	peptidase inhibitor complex	2/130	11/19894	0.181818	27.8238	7.21705	0.00224235	0.0130584	0.0088861	CASP1/CTSB	2
CC	GO:0044666	MLL3/4 complex	2/130	12/19894	0.166667	25.5051	6.88655	0.00267933	0.0150144	0.0102171	KMT2D/KMT2C	2
CC	GO:0099523	presynaptic cytosol	2/130	12/19894	0.166667	25.5051	6.88655	0.00267933	0.0150144	0.0102171	HTT/LRRK2	2
CC	GO:0035578	azurophil granule lumen	4/130	91/19894	0.043956	6.72663	4.44057	0.00300082	0.0165045	0.0112312	HEXB/ELANE/PRKCD/VCP	4
CC	GO:0043195	terminal bouton	3/130	45/19894	0.0666667	10.2021	5.01194	0.00316653	0.0170993	0.0116359	GRIN1/ADORA1/LRRK2	3
CC	GO:0001518	voltage-gated sodium channel complex	2/130	14/19894	0.142857	21.8615	6.33267	0.00366277	0.0190881	0.0129893	SCN4A/SCN5A	2
CC	GO:0045177	apical part of cell	9/130	468/19894	0.0192308	2.9429	3.44958	0.00366338	0.0190881	0.0129893	CDH2/APP/PDGFRB/CTSK/EGFR/SLC6A9/ABCG2/OXTR/CTSB	9
CC	GO:0030673	axolemma	2/130	15/19894	0.133333	20.4041	6.09714	0.00420825	0.0211839	0.0144154	ADORA1/ADORA2A	2
CC	GO:0048188	Set1C/COMPASS complex	2/130	15/19894	0.133333	20.4041	6.09714	0.00420825	0.0211839	0.0144154	SETD1A/SETD1B	2
CC	GO:0005770	late endosome	7/130	314/19894	0.022293	3.41151	3.49327	0.00462176	0.0228777	0.015568	GRIN2B/HTT/F2R/SMO/EGFR/MAP2K1/LRRK2	7
CC	GO:0016324	apical plasma membrane	8/130	402/19894	0.0199005	3.04539	3.36004	0.00495941	0.0241467	0.0164315	CDH2/PDGFRB/CTSK/EGFR/SLC6A9/ABCG2/OXTR/CTSB	8
CC	GO:0009897	external side of plasma membrane	8/130	405/19894	0.0197531	3.02283	3.33562	0.00518177	0.0248223	0.0168913	NCAM1/B4GALT1/TNF/KIT/CTSK/ABCG2/P2RX7/CTSB	8
CC	GO:0098802	plasma membrane signaling receptor complex	7/130	325/19894	0.0215385	3.29605	3.38472	0.00555948	0.026209	0.0178349	GRIN2B/GRIN1/PORCN/GRIN3A/GRIN2D/GRIN2A/JAK2	7
CC	GO:0000307	cyclin-dependent protein kinase holoenzyme complex	3/130	56/19894	0.0535714	8.19808	4.37468	0.00587187	0.0272491	0.0185427	CCND1/CDK4/CCND2	3
CC	GO:0016607	nuclear speck	8/130	416/19894	0.0192308	2.9429	3.24795	0.00606305	0.0277035	0.0188519	KMT2E/SETD1A/SETD1B/FTO/AR/HIF1A/MAPK14/TERT	8
CC	GO:0043679	axon terminus	4/130	112/19894	0.0357143	5.46538	3.84341	0.00627965	0.0282584	0.0192296	GRIN1/ACTB/ADORA1/LRRK2	4
CC	GO:0044305	calyx of Held	2/130	19/19894	0.105263	16.1085	5.34354	0.00673744	0.0290003	0.0197344	ACTB/ADORA1	2
CC	GO:0097449	astrocyte projection	2/130	19/19894	0.105263	16.1085	5.34354	0.00673744	0.0290003	0.0197344	ADGRG1/GRM5	2
CC	GO:0099522	cytosolic region	2/130	19/19894	0.105263	16.1085	5.34354	0.00673744	0.0290003	0.0197344	HTT/LRRK2	2
CC	GO:0000791	euchromatin	3/130	61/19894	0.0491803	7.5261	4.14008	0.00744577	0.0315913	0.0214975	KMT2E/HIF1A/JAK2	3
CC	GO:0030133	transport vesicle	8/130	434/19894	0.0184332	2.82084	3.1105	0.00774602	0.0324024	0.0220495	GRIN1/APP/GRIN2A/GABRA2/SLC6A9/PDE4B/KCNK9/LRRK2	8
CC	GO:0005912	adherens junction	5/130	188/19894	0.0265957	4.06997	3.43003	0.00790766	0.0326191	0.0221969	NDRG1/ACTB/CDH2/VEGFA/OXTR	5
CC	GO:0060076	excitatory synapse	3/130	64/19894	0.046875	7.17332	4.01173	0.00849851	0.0345761	0.0235287	GRIN1/SLC6A9/PDE4B	3
CC	GO:1904813	ficolin-1-rich granule lumen	4/130	124/19894	0.0322581	4.93648	3.56615	0.00893573	0.0358637	0.0244048	ASAH1/VCP/MAPK14/CTSB	4
CC	GO:0016363	nuclear matrix	4/130	128/19894	0.03125	4.78221	3.48158	0.00996157	0.0389288	0.0264906	NCOR2/ACTB/RAD21/PRKCD	4
CC	GO:0044306	neuron projection terminus	4/130	128/19894	0.03125	4.78221	3.48158	0.00996157	0.0389288	0.0264906	GRIN1/ACTB/ADORA1/LRRK2	4
CC	GO:0034706	sodium channel complex	2/130	24/19894	0.0833333	12.7526	4.67222	0.0106454	0.0410436	0.0279297	SCN4A/SCN5A	2
CC	GO:0070160	tight junction	4/130	131/19894	0.0305344	4.6727	3.42041	0.0107791	0.0410436	0.0279297	ASH1L/ACTB/CCND1/CDK4	4
CC	GO:0031594	neuromuscular junction	3/130	74/19894	0.0405405	6.20395	3.63732	0.0126146	0.0474245	0.0322718	APP/F2R/P2RX7	3
CC	GO:0098791	Golgi apparatus subcompartment	7/130	382/19894	0.0183246	2.80423	2.88773	0.0128543	0.0477216	0.032474	MGAT2/ST3GAL3/GALNT2/GBA1/B4GALT1/APP/LRRK2	7
CC	GO:0030057	desmosome	2/130	27/19894	0.0740741	11.3356	4.35849	0.0133667	0.0490113	0.0333517	B4GALT1/CDH2	2
MF	GO:0140938	histone H3 methyltransferase activity	12/130	42/18522	0.285714	40.7077	21.659	7.87209e-17	3.68414e-14	2.43621e-14	KMT2D/NSD2/PRDM16/EZH2/EHMT1/SETD2/KMT2A/SETD1A/NSD1/ASH1L/SETD1B/KMT2C	12
MF	GO:0030594	neurotransmitter receptor activity	15/130	98/18522	0.153061	21.8077	17.3634	2.41336e-16	5.15938e-14	3.41173e-14	GRIN2B/GRIN1/GRIN3A/GRIN2D/GRIN2A/GABRB3/GABRA3/GABRG2/GABRA1/GABRA5/GABRA2/GRM5/HTR2C/HTR2A/TSPO	15
MF	GO:0008170	N-methyltransferase activity	15/130	100/18522	0.15	21.3715	17.1729	3.30729e-16	5.15938e-14	3.41173e-14	KMT2D/NSD2/PRDM16/PRMT7/EZH2/EHMT1/HNMT/SETD2/KMT2A/FBXO11/SETD1A/NSD1/ASH1L/SETD1B/KMT2C	15
MF	GO:0042054	histone methyltransferase activity	13/130	66/18522	0.19697	28.0636	18.5173	8.10758e-16	9.48587e-14	6.2727e-14	KMT2D/NSD2/PRDM16/PRMT7/EZH2/EHMT1/SETD2/KMT2A/SETD1A/NSD1/ASH1L/SETD1B/KMT2C	13
MF	GO:0008276	protein methyltransferase activity	14/130	97/18522	0.14433	20.5637	16.2413	5.88221e-15	5.50575e-13	3.64078e-13	KMT2D/NSD2/PRDM16/PRMT7/EZH2/EHMT1/SETD2/KMT2A/FBXO11/SETD1A/NSD1/ASH1L/SETD1B/KMT2C	14
MF	GO:0016279	protein-lysine N-methyltransferase activity	12/130	64/18522	0.1875	26.7144	17.3246	2.05314e-14	1.60145e-12	1.05899e-12	KMT2D/NSD2/PRDM16/EZH2/EHMT1/SETD2/KMT2A/SETD1A/NSD1/ASH1L/SETD1B/KMT2C	12
MF	GO:0016278	lysine N-methyltransferase activity	12/130	65/18522	0.184615	26.3034	17.1809	2.50317e-14	1.67355e-12	1.10666e-12	KMT2D/NSD2/PRDM16/EZH2/EHMT1/SETD2/KMT2A/SETD1A/NSD1/ASH1L/SETD1B/KMT2C	12
MF	GO:0008757	S-adenosylmethionine-dependent methyltransferase activity	16/130	165/18522	0.0969697	13.8159	13.9021	3.80927e-14	2.22842e-12	1.47359e-12	KMT2D/NSD2/PRDM16/PRMT7/GAMT/EZH2/EHMT1/HNMT/SETD2/KMT2A/FBXO11/SETD1A/NSD1/ASH1L/SETD1B/KMT2C	16
MF	GO:0005230	extracellular ligand-gated monoatomic ion channel activity	12/130	73/18522	0.164384	23.4209	16.1368	1.08988e-13	5.66735e-12	3.74764e-12	GRIN2B/GRIN1/GRIN3A/GRIN2D/GRIN2A/GABRB3/GABRA3/GABRG2/GABRA1/GABRA5/GABRA2/P2RX7	12
MF	GO:0022824	transmitter-gated monoatomic ion channel activity	11/130	58/18522	0.189655	27.0215	16.6868	2.27976e-13	9.04457e-12	5.98089e-12	GRIN2B/GRIN1/GRIN3A/GRIN2D/GRIN2A/GABRB3/GABRA3/GABRG2/GABRA1/GABRA5/GABRA2	11
MF	GO:0022835	transmitter-gated channel activity	11/130	58/18522	0.189655	27.0215	16.6868	2.27976e-13	9.04457e-12	5.98089e-12	GRIN2B/GRIN1/GRIN3A/GRIN2D/GRIN2A/GABRB3/GABRA3/GABRG2/GABRA1/GABRA5/GABRA2	11
MF	GO:0016741	transferase activity, transferring one-carbon groups	17/130	219/18522	0.0776256	11.0599	12.5905	2.31912e-13	9.04457e-12	5.98089e-12	KMT2D/NSD2/ATIC/PRDM16/PRMT7/GAMT/EZH2/EHMT1/HNMT/SETD2/KMT2A/FBXO11/SETD1A/NSD1/ASH1L/SETD1B/KMT2C	17
MF	GO:0008168	methyltransferase activity	16/130	208/18522	0.0769231	10.9598	12.1445	1.41315e-12	5.08734e-11	3.3641e-11	KMT2D/NSD2/PRDM16/PRMT7/GAMT/EZH2/EHMT1/HNMT/SETD2/KMT2A/FBXO11/SETD1A/NSD1/ASH1L/SETD1B/KMT2C	16
MF	GO:0140993	histone modifying activity	15/130	207/18522	0.0724638	10.3244	11.3421	1.7406e-11	5.81858e-10	3.84764e-10	KMT2D/NSD2/PRDM16/PRMT7/EZH2/EHMT1/SETD2/KMT2A/SETD1A/NSD1/ASH1L/SETD1B/KMT2C/PRKCA/JAK2	15
MF	GO:0008503	benzodiazepine receptor activity	6/130	11/18522	0.545455	77.7147	21.3968	4.77744e-11	1.49056e-09	9.85661e-10	GABRA3/GABRG2/GABRA1/GABRA5/GABRA2/TSPO	6
MF	GO:0022851	GABA-gated chloride ion channel activity	6/130	13/18522	0.461538	65.7586	19.6366	1.75417e-10	5.13095e-09	3.39294e-09	GABRB3/GABRA3/GABRG2/GABRA1/GABRA5/GABRA2	6
MF	GO:0098960	postsynaptic neurotransmitter receptor activity	9/130	67/18522	0.134328	19.1387	12.5048	9.47597e-10	2.60868e-08	1.72504e-08	GRIN2B/GRIN3A/GRIN2D/GRIN2A/GABRG2/GABRA1/GABRA5/GABRA2/GRM5	9
MF	GO:1904315	transmitter-gated monoatomic ion channel activity involved in regulation of postsynaptic membrane potential	8/130	50/18522	0.16	22.7963	12.9748	1.98649e-09	5.16487e-08	3.41536e-08	GRIN2B/GRIN3A/GRIN2D/GRIN2A/GABRG2/GABRA1/GABRA5/GABRA2	8
MF	GO:0015276	ligand-gated monoatomic ion channel activity	12/130	169/18522	0.0710059	10.1167	10.0096	2.55387e-09	5.85416e-08	3.87117e-08	GRIN2B/GRIN1/GRIN3A/GRIN2D/GRIN2A/GABRB3/GABRA3/GABRG2/GABRA1/GABRA5/GABRA2/P2RX7	12
MF	GO:0004890	GABA-A receptor activity	6/130	19/18522	0.315789	44.9927	16.1297	2.67945e-09	5.85416e-08	3.87117e-08	GABRB3/GABRA3/GABRG2/GABRA1/GABRA5/GABRA2	6
MF	GO:0042800	histone H3K4 methyltransferase activity	6/130	19/18522	0.315789	44.9927	16.1297	2.67945e-09	5.85416e-08	3.87117e-08	KMT2D/KMT2A/SETD1A/ASH1L/SETD1B/KMT2C	6
MF	GO:0099529	neurotransmitter receptor activity involved in regulation of postsynaptic membrane potential	8/130	52/18522	0.153846	21.9195	12.7002	2.75195e-09	5.85416e-08	3.87117e-08	GRIN2B/GRIN3A/GRIN2D/GRIN2A/GABRG2/GABRA1/GABRA5/GABRA2	8
MF	GO:0022834	ligand-gated channel activity	12/130	171/18522	0.0701754	9.99838	9.93853	2.92047e-09	5.94252e-08	3.9296e-08	GRIN2B/GRIN1/GRIN3A/GRIN2D/GRIN2A/GABRB3/GABRA3/GABRG2/GABRA1/GABRA5/GABRA2/P2RX7	12
MF	GO:0140999	histone H3K4 trimethyltransferase activity	5/130	10/18522	0.5	71.2385	18.6783	3.86248e-09	7.53183e-08	4.98056e-08	KMT2D/KMT2A/SETD1A/SETD1B/KMT2C	5
MF	GO:0099095	ligand-gated monoatomic anion channel activity	6/130	21/18522	0.285714	40.7077	15.3065	5.29762e-09	9.91715e-08	6.5579e-08	GABRB3/GABRA3/GABRG2/GABRA1/GABRA5/GABRA2	6
MF	GO:0016917	GABA receptor activity	6/130	22/18522	0.272727	38.8573	14.9371	7.24247e-09	1.30364e-07	8.62059e-08	GABRB3/GABRA3/GABRG2/GABRA1/GABRA5/GABRA2	6
MF	GO:0022836	gated channel activity	14/130	301/18522	0.0465116	6.62683	8.27467	2.67427e-08	4.6354e-07	3.06525e-07	GRIN2B/GRIN1/GRIN3A/CACNA1B/GRIN2D/GRIN2A/GABRB3/GABRA3/GABRG2/GABRA1/GABRA5/GABRA2/KCNK9/P2RX7	14
MF	GO:0008066	glutamate receptor activity	6/130	27/18522	0.222222	31.6615	13.4041	2.79187e-08	4.6664e-07	3.08575e-07	GRIN2B/GRIN1/GRIN3A/GRIN2D/GRIN2A/GRM5	6
MF	GO:0005216	monoatomic ion channel activity	16/130	441/18522	0.0362812	5.16923	7.44995	8.2426e-08	1.33018e-06	8.79609e-07	GRIN2B/GRIN1/GRIN3A/CACNA1B/GRIN2D/GRIN2A/GABRB3/GABRA3/GABRG2/GABRA1/GABRA5/GABRA2/SCN4A/SCN5A/KCNK9/P2RX7	16
MF	GO:0004970	glutamate-gated receptor activity	5/130	17/18522	0.294118	41.905	14.1855	9.11762e-08	1.42235e-06	9.40554e-07	GRIN2B/GRIN1/GRIN3A/GRIN2D/GRIN2A	5
MF	GO:0004713	protein tyrosine kinase activity	9/130	138/18522	0.0652174	9.29197	8.21991	5.58962e-07	8.43852e-06	5.58013e-06	FGFR1/FLT1/PDGFRB/KIT/PRKCD/EGFR/JAK2/MAP2K1/ABL1	9
MF	GO:0019887	protein kinase regulator activity	11/130	232/18522	0.0474138	6.75537	7.41652	7.38355e-07	1.07984e-05	7.14067e-06	YWHAG/VEGFA/SMO/GRM5/EGFR/CASP3/MAP2K1/HTR2A/CCND1/CDK4/CCND2	11
MF	GO:0046975	histone H3K36 methyltransferase activity	4/130	13/18522	0.307692	43.8391	12.99	1.57733e-06	2.23695e-05	1.47922e-05	NSD2/SETD2/NSD1/ASH1L	4
MF	GO:0015929	hexosaminidase activity	4/130	14/18522	0.285714	40.7077	12.4953	2.19627e-06	3.0231e-05	1.99908e-05	NAGLU/NAGA/HEXA/HEXB	4
MF	GO:0016757	glycosyltransferase activity	11/130	268/18522	0.0410448	5.84793	6.72101	3.01393e-06	4.03006e-05	2.66495e-05	OGT/MGAT2/ST3GAL3/DPAGT1/GALNT2/POMGNT1/GBA1/B4GALT1/HEXA/HEXB/PARP1	11
MF	GO:0019207	kinase regulator activity	11/130	270/18522	0.0407407	5.80462	6.68613	3.23737e-06	4.20858e-05	2.783e-05	YWHAG/VEGFA/SMO/GRM5/EGFR/CASP3/MAP2K1/HTR2A/CCND1/CDK4/CCND2	11
MF	GO:0099507	ligand-gated monoatomic ion channel activity involved in regulation of presynaptic membrane potential	4/130	16/18522	0.25	35.6192	11.6469	3.94994e-06	4.99614e-05	3.30379e-05	GRIN2B/GRIN2D/GABRA5/GABRA2	4
MF	GO:0004553	hydrolase activity, hydrolyzing O-glycosyl compounds	7/130	94/18522	0.0744681	10.61	7.85302	4.39781e-06	5.41625e-05	3.5816e-05	NEU1/NAGLU/GBA1/NAGA/HEXA/HEXB/GNE	7
MF	GO:0008375	acetylglucosaminyltransferase activity	5/130	45/18522	0.111111	15.8308	8.37421	1.53789e-05	0.000184546	0.000122035	OGT/MGAT2/POMGNT1/HEXA/HEXB	5
MF	GO:0005254	chloride channel activity	6/130	82/18522	0.0731707	10.4251	7.19124	2.40913e-05	0.000281869	0.000186391	GABRB3/GABRA3/GABRG2/GABRA1/GABRA5/GABRA2	6
MF	GO:0016597	amino acid binding	5/130	50/18522	0.1	14.2477	7.88602	2.59318e-05	0.000296002	0.000195737	GRIN2B/GRIN1/NOS1/GRIN3A/GRIN2D	5
MF	GO:0030295	protein kinase activator activity	7/130	129/18522	0.0542636	7.73131	6.44996	3.50548e-05	0.000390464	0.000258202	VEGFA/GRM5/EGFR/MAP2K1/HTR2A/CCND1/CCND2	7
MF	GO:0099604	ligand-gated calcium channel activity	4/130	27/18522	0.148148	21.1077	8.79035	3.5876e-05	0.000390464	0.000258202	GRIN2B/GRIN1/GRIN2D/GRIN2A	4
MF	GO:0016798	hydrolase activity, acting on glycosyl bonds	7/130	133/18522	0.0526316	7.49879	6.32366	4.26303e-05	0.000453432	0.00029984	NEU1/NAGLU/GBA1/NAGA/HEXA/HEXB/GNE	7
MF	GO:0019209	kinase activator activity	7/130	137/18522	0.0510949	7.27984	6.2025	5.15004e-05	0.000535604	0.000354178	VEGFA/GRM5/EGFR/MAP2K1/HTR2A/CCND1/CCND2	7
MF	GO:0016594	glycine binding	3/130	11/18522	0.272727	38.8573	10.559	5.34979e-05	0.000544283	0.000359917	GRIN2B/GRIN1/GRIN3A	3
MF	GO:0005253	monoatomic anion channel activity	6/130	95/18522	0.0631579	8.99854	6.57105	5.55107e-05	0.000552745	0.000365513	GABRB3/GABRA3/GABRG2/GABRA1/GABRA5/GABRA2	6
MF	GO:0004714	transmembrane receptor protein tyrosine kinase activity	5/130	60/18522	0.0833333	11.8731	7.09215	6.3199e-05	0.00061619	0.000407467	FGFR1/FLT1/PDGFRB/KIT/EGFR	5
MF	GO:0030296	protein tyrosine kinase activator activity	4/130	32/18522	0.125	17.8096	8.00117	7.15401e-05	0.000677168	0.00044779	VEGFA/GRM5/EGFR/HTR2A	4
MF	GO:0016758	hexosyltransferase activity	8/130	196/18522	0.0408163	5.81538	5.6979	7.35721e-05	0.000677168	0.00044779	OGT/MGAT2/GALNT2/POMGNT1/GBA1/B4GALT1/HEXA/HEXB	8
MF	GO:0008194	UDP-glycosyltransferase activity	7/130	145/18522	0.0482759	6.8782	5.97421	7.37939e-05	0.000677168	0.00044779	OGT/MGAT2/GALNT2/POMGNT1/B4GALT1/HEXA/HEXB	7
MF	GO:0015171	amino acid transmembrane transporter activity	6/130	101/18522	0.0594059	8.46398	6.32359	7.82179e-05	0.000703961	0.000465507	GRIN2B/GRIN1/GRIN3A/GRIN2D/GRIN2A/SLC6A9	6
MF	GO:0046974	histone H3K9 methyltransferase activity	3/130	13/18522	0.230769	32.8793	9.6667	9.17807e-05	0.000805488	0.000532644	PRDM16/EHMT1/ASH1L	3
MF	GO:0030145	manganese ion binding	5/130	65/18522	0.0769231	10.9598	6.76261	9.29409e-05	0.000805488	0.000532644	MGAT2/GALNT2/POMGNT1/B4GALT1/ABL1	5
MF	GO:0005261	monoatomic cation channel activity	10/130	330/18522	0.030303	4.31748	5.11228	0.000113346	0.000964473	0.000637776	GRIN2B/GRIN1/GRIN3A/CACNA1B/GRIN2D/GRIN2A/SCN4A/SCN5A/KCNK9/P2RX7	10
MF	GO:0001221	transcription coregulator binding	6/130	114/18522	0.0526316	7.49879	5.85155	0.000152823	0.00125476	0.000829733	EZH2/EHMT1/AR/HIF1A/RORA/TERT	6
MF	GO:0005262	calcium channel activity	6/130	114/18522	0.0526316	7.49879	5.85155	0.000152823	0.00125476	0.000829733	GRIN2B/GRIN1/GRIN3A/CACNA1B/GRIN2D/GRIN2A	6
MF	GO:0004707	MAP kinase activity	3/130	16/18522	0.1875	26.7144	8.65107	0.000176961	0.0013803	0.000912746	MAPK8/MAPK10/MAPK14	3
MF	GO:0004708	MAP kinase kinase activity	3/130	16/18522	0.1875	26.7144	8.65107	0.000176961	0.0013803	0.000912746	MAPK10/MAPK14/MAP2K1	3
MF	GO:0140939	histone H4 methyltransferase activity	3/130	16/18522	0.1875	26.7144	8.65107	0.000176961	0.0013803	0.000912746	NSD2/PRMT7/NSD1	3
MF	GO:0015108	chloride transmembrane transporter activity	6/130	120/18522	0.05	7.12385	5.65812	0.000202271	0.00155185	0.00102619	GABRB3/GABRA3/GABRG2/GABRA1/GABRA5/GABRA2	6
MF	GO:0042169	SH2 domain binding	4/130	42/18522	0.0952381	13.5692	6.85602	0.000210919	0.00158636	0.00104901	FGFR1/KIT/JAK2/ABL1	4
MF	GO:0005244	voltage-gated monoatomic ion channel activity	7/130	172/18522	0.0406977	5.79848	5.31544	0.000213548	0.00158636	0.00104901	GRIN2B/GRIN1/GRIN3A/CACNA1B/GRIN2D/GRIN2A/KCNK9	7
MF	GO:0022832	voltage-gated channel activity	7/130	173/18522	0.0404624	5.76496	5.29378	0.000221271	0.00161804	0.00106996	GRIN2B/GRIN1/GRIN3A/CACNA1B/GRIN2D/GRIN2A/KCNK9	7
MF	GO:0019199	transmembrane receptor protein kinase activity	5/130	79/18522	0.0632911	9.01753	6.00382	0.000234487	0.00168831	0.00111643	FGFR1/FLT1/PDGFRB/KIT/EGFR	5
MF	GO:0001223	transcription coactivator binding	4/130	44/18522	0.0909091	12.9524	6.67337	0.00025305	0.00179436	0.00118655	AR/HIF1A/RORA/TERT	4
MF	GO:0046943	carboxylic acid transmembrane transporter activity	7/130	181/18522	0.038674	5.51016	5.12636	0.000291524	0.00203632	0.00134655	GRIN2B/GRIN1/GRIN3A/GRIN2D/GRIN2A/SLC6A9/ABCG2	7
MF	GO:0005342	organic acid transmembrane transporter activity	7/130	182/18522	0.0384615	5.47988	5.10613	0.00030144	0.00207462	0.00137188	GRIN2B/GRIN1/GRIN3A/GRIN2D/GRIN2A/SLC6A9/ABCG2	7
MF	GO:0015085	calcium ion transmembrane transporter activity	6/130	132/18522	0.0454545	6.47622	5.30844	0.000338586	0.0022965	0.0015186	GRIN2B/GRIN1/GRIN3A/CACNA1B/GRIN2D/GRIN2A	6
MF	GO:0044325	transmembrane transporter binding	6/130	133/18522	0.0451128	6.42753	5.28127	0.000352568	0.00235717	0.00155872	NOS1/HTT/PDE4B/TSPO/SCN5A/LRRK2	6
MF	GO:0019838	growth factor binding	6/130	135/18522	0.0444444	6.33231	5.22777	0.000381887	0.00251723	0.00166456	FGFR1/FLT1/PDGFRB/KIT/EGFR/SCN5A	6
MF	GO:0016538	cyclin-dependent protein serine/threonine kinase regulator activity	4/130	50/18522	0.08	11.3982	6.18976	0.000415576	0.00270124	0.00178625	CASP3/CCND1/CDK4/CCND2	4
MF	GO:0002020	protease binding	6/130	140/18522	0.0428571	6.10615	5.0986	0.000463563	0.00296452	0.00196034	TNF/KIT/ELANE/CASP3/VCP/CASP1	6
MF	GO:0004115	3',5'-cyclic-AMP phosphodiesterase activity	3/130	22/18522	0.136364	19.4287	7.27125	0.000471886	0.00296452	0.00196034	PDE10A/PDE4A/PDE4B	3
MF	GO:0042562	hormone binding	5/130	92/18522	0.0543478	7.74331	5.45122	0.000475821	0.00296452	0.00196034	AR/EGFR/OXTR/TSPO/CRHR1	5
MF	GO:0008509	monoatomic anion transmembrane transporter activity	6/130	141/18522	0.0425532	6.06285	5.07352	0.000481418	0.00296452	0.00196034	GABRB3/GABRA3/GABRG2/GABRA1/GABRA5/GABRA2	6
MF	GO:0019903	protein phosphatase binding	6/130	142/18522	0.0422535	6.02015	5.04868	0.000499804	0.00303777	0.00200878	GRIN3A/MAPK8/CDH2/EGFR/VCP/MAPK14	6
MF	GO:0030552	cAMP binding	3/130	23/18522	0.130435	18.5839	7.09407	0.000539894	0.00319836	0.00211497	PDE10A/PDE4A/PDE4B	3
MF	GO:0047555	3',5'-cyclic-GMP phosphodiesterase activity	3/130	23/18522	0.130435	18.5839	7.09407	0.000539894	0.00319836	0.00211497	PDE10A/PDE4A/PDE4B	3
MF	GO:0004114	3',5'-cyclic-nucleotide phosphodiesterase activity	3/130	24/18522	0.125	17.8096	6.92772	0.000613867	0.00359112	0.0023747	PDE10A/PDE4A/PDE4B	3
MF	GO:0015103	inorganic anion transmembrane transporter activity	6/130	153/18522	0.0392157	5.58733	4.79019	0.000740335	0.00427749	0.00282857	GABRB3/GABRA3/GABRG2/GABRA1/GABRA5/GABRA2	6
MF	GO:0004112	cyclic-nucleotide phosphodiesterase activity	3/130	26/18522	0.115385	16.4396	6.6233	0.000780527	0.00440104	0.00291027	PDE10A/PDE4A/PDE4B	3
MF	GO:0004709	MAP kinase kinase kinase activity	3/130	26/18522	0.115385	16.4396	6.6233	0.000780527	0.00440104	0.00291027	EGFR/RAF1/LRRK2	3
MF	GO:0004674	protein serine/threonine kinase activity	10/130	427/18522	0.0234192	3.3367	4.10701	0.000869406	0.00484383	0.00320307	MAPK8/MAPK10/PRKCD/EGFR/PRKCA/MAPK14/MAP2K1/CDK4/RAF1/LRRK2	10
MF	GO:0046873	metal ion transmembrane transporter activity	10/130	437/18522	0.0228833	3.26034	4.02017	0.00103583	0.00570314	0.00377131	GRIN2B/GRIN1/GRIN3A/CACNA1B/GRIN2D/GRIN2A/SCN4A/SLC6A9/SCN5A/KCNK9	10
MF	GO:0106310	protein serine kinase activity	9/130	363/18522	0.0247934	3.53249	4.09679	0.00106217	0.00571822	0.00378128	MAPK8/MAPK10/PRKCD/PRKCA/MAPK14/MAP2K1/CDK4/RAF1/LRRK2	9
MF	GO:0050840	extracellular matrix binding	4/130	64/18522	0.0625	8.90481	5.32572	0.001063	0.00571822	0.00378128	SHH/ADGRG1/AGRN/VEGFA	4
MF	GO:0005539	glycosaminoglycan binding	7/130	239/18522	0.0292887	4.17296	4.15078	0.00150336	0.00799514	0.00528694	SHH/ADGRG1/FGFR1/AGRN/APP/VEGFA/ELANE	7
MF	GO:0140297	DNA-binding transcription factor binding	10/130	478/18522	0.0209205	2.98069	3.68853	0.00201385	0.0105897	0.00700264	PRDM16/NCOR2/SETD1A/NSD1/ACTB/PARP1/RAD21/AR/HIF1A/MAPK14	10
MF	GO:0043394	proteoglycan binding	3/130	36/18522	0.0833333	11.8731	5.48999	0.00203661	0.0105904	0.00700308	AGRN/CTSK/CTSB	3
MF	GO:0042826	histone deacetylase binding	5/130	128/18522	0.0390625	5.5655	4.35758	0.00209504	0.0107745	0.00712482	MAPK8/NCOR2/PARP1/HIF1A/CCND1	5
MF	GO:0019902	phosphatase binding	6/130	189/18522	0.031746	4.52308	4.09285	0.00218586	0.0109782	0.00725955	GRIN3A/MAPK8/CDH2/EGFR/VCP/MAPK14	6
MF	GO:0030291	protein serine/threonine kinase inhibitor activity	3/130	37/18522	0.0810811	11.5522	5.40161	0.00220503	0.0109782	0.00725955	YWHAG/SMO/CASP3	3
MF	GO:0030551	cyclic nucleotide binding	3/130	37/18522	0.0810811	11.5522	5.40161	0.00220503	0.0109782	0.00725955	PDE10A/PDE4A/PDE4B	3
MF	GO:0008514	organic anion transmembrane transporter activity	7/130	258/18522	0.0271318	3.86565	3.89695	0.00231775	0.011418	0.00755034	GRIN2B/GRIN1/GRIN3A/GRIN2D/GRIN2A/SLC6A9/ABCG2	7
MF	GO:0099094	ligand-gated monoatomic cation channel activity	5/130	132/18522	0.0378788	5.39685	4.26214	0.00239564	0.0116788	0.0077228	GRIN2B/GRIN1/GRIN2D/GRIN2A/P2RX7	5
MF	GO:0050998	nitric-oxide synthase binding	2/130	11/18522	0.181818	25.9049	6.94633	0.00257947	0.0121939	0.00806343	ACTB/SCN5A	2
MF	GO:0051378	serotonin binding	2/130	11/18522	0.181818	25.9049	6.94633	0.00257947	0.0121939	0.00806343	HTR2C/HTR2A	2
MF	GO:0140996	histone H3 kinase activity	2/130	11/18522	0.181818	25.9049	6.94633	0.00257947	0.0121939	0.00806343	PRKCA/JAK2	2
MF	GO:0031406	carboxylic acid binding	6/130	196/18522	0.0306122	4.36154	3.97761	0.00262079	0.0122653	0.00811064	GRIN2B/GRIN1/NOS1/GRIN3A/AGRN/GRIN2D	6
MF	GO:0061629	RNA polymerase II-specific DNA-binding transcription factor binding	8/130	343/18522	0.0233236	3.32308	3.65103	0.0029296	0.0135748	0.00897658	NCOR2/SETD1A/NSD1/ACTB/PARP1/AR/HIF1A/MAPK14	8
MF	GO:0001540	amyloid-beta binding	4/130	85/18522	0.0470588	6.7048	4.43194	0.00302539	0.0137332	0.00908136	GRIN2B/GRIN1/CACNA1B/GRIN2A	4
MF	GO:0004197	cysteine-type endopeptidase activity	4/130	85/18522	0.0470588	6.7048	4.43194	0.00302539	0.0137332	0.00908136	CTSK/CASP3/CASP1/CTSB	4
MF	GO:0016273	arginine N-methyltransferase activity	2/130	12/18522	0.166667	23.7462	6.62651	0.00308118	0.0137332	0.00908136	PRMT7/FBXO11	2
MF	GO:0016274	protein-arginine N-methyltransferase activity	2/130	12/18522	0.166667	23.7462	6.62651	0.00308118	0.0137332	0.00908136	PRMT7/FBXO11	2
MF	GO:0008013	beta-catenin binding	4/130	86/18522	0.0465116	6.62683	4.39713	0.00315597	0.0139339	0.00921407	SETD1A/CDH2/AR/RORA	4
MF	GO:0004712	protein serine/threonine/tyrosine kinase activity	3/130	43/18522	0.0697674	9.94025	4.9344	0.00339671	0.0148566	0.00982423	MAPK10/MAPK14/MAP2K1	3
MF	GO:0043177	organic acid binding	6/130	208/18522	0.0288462	4.10991	3.79208	0.0035136	0.0152256	0.0100682	GRIN2B/GRIN1/NOS1/GRIN3A/AGRN/GRIN2D	6
MF	GO:0043560	insulin receptor substrate binding	2/130	13/18522	0.153846	21.9195	6.34339	0.0036247	0.0155629	0.0102913	PRKCD/JAK2	2
MF	GO:0003925	G protein activity	3/130	45/18522	0.0666667	9.49846	4.79866	0.00386606	0.0163001	0.0107788	NRAS/KRAS/HRAS	3
MF	GO:0004715	non-membrane spanning protein tyrosine kinase activity	3/130	45/18522	0.0666667	9.49846	4.79866	0.00386606	0.0163001	0.0107788	PRKCD/JAK2/ABL1	3
MF	GO:0005161	platelet-derived growth factor receptor binding	2/130	14/18522	0.142857	20.3538	6.09033	0.00420945	0.0175895	0.0116314	VEGFA/PDGFRB	2
MF	GO:0001222	transcription corepressor binding	3/130	47/18522	0.0638298	9.09427	4.67115	0.00437304	0.0181113	0.0119765	EZH2/EHMT1/RORA	3
MF	GO:0043176	amine binding	2/130	15/18522	0.133333	18.9969	5.86226	0.00483483	0.0198482	0.013125	HTR2C/HTR2A	2
MF	GO:0004697	diacylglycerol-dependent serine/threonine kinase activity	2/130	16/18522	0.125	17.8096	5.65524	0.00550023	0.0220009	0.0145485	PRKCD/PRKCA	2
MF	GO:0008142	oxysterol binding	2/130	16/18522	0.125	17.8096	5.65524	0.00550023	0.0220009	0.0145485	SMO/RORA	2
MF	GO:0061575	cyclin-dependent protein serine/threonine kinase activator activity	2/130	16/18522	0.125	17.8096	5.65524	0.00550023	0.0220009	0.0145485	CCND1/CCND2	2
MF	GO:0004879	nuclear receptor activity	3/130	52/18522	0.0576923	8.21982	4.38313	0.00581061	0.0230455	0.0152393	AR/RORB/RORA	3
MF	GO:0098531	ligand-activated transcription factor activity	3/130	53/18522	0.0566038	8.06473	4.33013	0.00612806	0.0239999	0.0158704	AR/RORB/RORA	3
MF	GO:0046965	nuclear retinoid X receptor binding	2/130	17/18522	0.117647	16.762	5.46614	0.0062051	0.0239999	0.0158704	NCOR2/NSD1	2
MF	GO:0070064	proline-rich region binding	2/130	17/18522	0.117647	16.762	5.46614	0.0062051	0.0239999	0.0158704	CCND1/ABL1	2
MF	GO:0016504	peptidase activator activity	3/130	55/18522	0.0545455	7.77147	4.2282	0.00679357	0.0260606	0.017233	CTSK/VCP/CASP1	3
MF	GO:0005496	steroid binding	4/130	107/18522	0.0373832	5.32624	3.77317	0.0068533	0.026076	0.0172432	SMO/AR/RORA/TSPO	4
MF	GO:0030297	transmembrane receptor protein tyrosine kinase activator activity	2/130	18/18522	0.111111	15.8308	5.29245	0.00694883	0.0262262	0.0173426	VEGFA/EGFR	2
MF	GO:0008201	heparin binding	5/130	174/18522	0.0287356	4.09416	3.44757	0.00770047	0.0288306	0.0190648	ADGRG1/FGFR1/APP/VEGFA/ELANE	5
MF	GO:0042393	histone binding	6/130	252/18522	0.0238095	3.39231	3.21468	0.00878206	0.0326191	0.02157	KMT2D/PRMT7/KMT2E/KMT2A/KMT2C/JAK2	6
MF	GO:0008656	cysteine-type endopeptidase activator activity involved in apoptotic process	2/130	21/18522	0.0952381	13.5692	4.84518	0.00940758	0.0343965	0.0227453	CTSK/CASP1	2
MF	GO:0019200	carbohydrate kinase activity	2/130	21/18522	0.0952381	13.5692	4.84518	0.00940758	0.0343965	0.0227453	GNE/GCK	2
MF	GO:0042277	peptide binding	7/130	336/18522	0.0208333	2.96827	3.06108	0.00960687	0.0348528	0.0230471	GRIN2B/GRIN1/FOLH1/CACNA1B/GRIN2A/OXTR/CRHR1	7
MF	GO:0004993	G protein-coupled serotonin receptor activity	2/130	22/18522	0.0909091	12.9524	4.71598	0.0103012	0.0368011	0.0243354	HTR2C/HTR2A	2
MF	GO:0005248	voltage-gated sodium channel activity	2/130	22/18522	0.0909091	12.9524	4.71598	0.0103012	0.0368011	0.0243354	SCN4A/SCN5A	2
MF	GO:0043539	protein serine/threonine kinase activator activity	3/130	65/18522	0.0461538	6.57586	3.78597	0.0107523	0.038122	0.0252089	MAP2K1/CCND1/CCND2	3
MF	GO:0017134	fibroblast growth factor binding	2/130	23/18522	0.0869565	12.3893	4.5949	0.0112308	0.0389334	0.0257455	FGFR1/SCN5A	2
MF	GO:0035173	histone kinase activity	2/130	23/18522	0.0869565	12.3893	4.5949	0.0112308	0.0389334	0.0257455	PRKCA/JAK2	2
MF	GO:0140103	catalytic activity, acting on a glycoprotein	2/130	23/18522	0.0869565	12.3893	4.5949	0.0112308	0.0389334	0.0257455	MGAT2/POMGNT1	2
MF	GO:1901681	sulfur compound binding	6/130	267/18522	0.0224719	3.20173	3.04662	0.0114586	0.0394312	0.0260746	ADGRG1/FGFR1/AGRN/APP/VEGFA/ELANE	6
MF	GO:0002039	p53 binding	3/130	67/18522	0.0447761	6.37956	3.70866	0.0116738	0.0395893	0.0261792	HTT/EHMT1/HIF1A	3
MF	GO:0032934	sterol binding	3/130	67/18522	0.0447761	6.37956	3.70866	0.0116738	0.0395893	0.0261792	SMO/RORA/TSPO	3
MF	GO:0005518	collagen binding	3/130	68/18522	0.0441176	6.28575	3.67117	0.012151	0.0404803	0.0267683	ADGRG1/CTSK/CTSB	3
MF	GO:0016505	peptidase activator activity involved in apoptotic process	2/130	24/18522	0.0833333	11.8731	4.4811	0.012196	0.0404803	0.0267683	CTSK/CASP1	2
MF	GO:0106222	lncRNA binding	2/130	24/18522	0.0833333	11.8731	4.4811	0.012196	0.0404803	0.0267683	EZH2/RAD21	2
MF	GO:0003714	transcription corepressor activity	5/130	198/18522	0.0252525	3.5979	3.08983	0.0129665	0.0427347	0.0282591	EZH2/NCOR2/NSD1/ELANE/CCND1	5
MF	GO:0097110	scaffold protein binding	3/130	70/18522	0.0428571	6.10615	3.59841	0.0131388	0.0429997	0.0284343	NOS1/MAP2K1/SCN5A	3
MF	GO:0016811	hydrolase activity, acting on carbon-nitrogen (but not peptide) bonds, in linear amides	3/130	72/18522	0.0416667	5.93654	3.52842	0.0141712	0.0459311	0.0303728	UPB1/ASAH1/NGLY1	3
MF	GO:0042974	nuclear retinoic acid receptor binding	2/130	26/18522	0.0769231	10.9598	4.27254	0.0142308	0.0459311	0.0303728	NCOR2/NSD1	2
MF	GO:0004860	protein kinase inhibitor activity	3/130	73/18522	0.0410959	5.85522	3.4944	0.0147041	0.0470131	0.0310883	YWHAG/SMO/CASP3	3
MF	GO:0016810	hydrolase activity, acting on carbon-nitrogen (but not peptide) bonds	4/130	134/18522	0.0298507	4.25304	3.17734	0.0147669	0.0470131	0.0310883	UPB1/ATIC/ASAH1/NGLY1	4
MF	GO:0005516	calmodulin binding	5/130	205/18522	0.0243902	3.47505	2.99587	0.0148711	0.0470248	0.031096	GRIN1/NOS1/EGFR/ADORA2A/SCN5A	5
MF	GO:0016922	nuclear receptor binding	4/130	136/18522	0.0294118	4.1905	3.1396	0.0155133	0.0487263	0.0322211	NCOR2/NSD1/PARP1/HIF1A	4
MF	GO:0019003	GDP binding	3/130	75/18522	0.04	5.69908	3.42823	0.0158039	0.0493081	0.0326059	NRAS/KRAS/HRAS	3
