# Supplementary material for: Study on the Mechanism of DNHP's Effects on Brain Damage Based on Network Toxicology
Source: Research Square preprint supplement (doi:10.21203/rs.3.rs-7966294/v1), 2025-12-01
Supplement: Supplementary file 2 [file 1f5e2c1662f0c3e3dbc591ea.xlsx]

## Sheet: GeneCards-SearchResults
Gene Symbol	Description	Category	Uniprot ID	Gifts	GC Id	Relevance score	GeneCards Link
BDNF	Brain Derived Neurotrophic Factor	Protein Coding	P23560	63	GC11M027654	77.9027	https://www.genecards.org/cgi-bin/carddisp.pl?gene=BDNF
PLA2G6	Phospholipase A2 Group VI	Protein Coding	O60733	59	GC22M080968	76.0962	https://www.genecards.org/cgi-bin/carddisp.pl?gene=PLA2G6
TP53	Tumor Protein P53	Protein Coding	P04637	66	GC17M007661	76.0163	https://www.genecards.org/cgi-bin/carddisp.pl?gene=TP53
POMT2	Protein O-Mannosyltransferase 2	Protein Coding	Q9UKY4	55	GC14M077274	72.7096	https://www.genecards.org/cgi-bin/carddisp.pl?gene=POMT2
BDNF-AS	BDNF Antisense RNA	RNA Gene		31	GC11P027466	70.5837	https://www.genecards.org/cgi-bin/carddisp.pl?gene=BDNF-AS
PANK2	Pantothenate Kinase 2	Protein Coding	Q9BZ23	58	GC20P008991	61.3348	https://www.genecards.org/cgi-bin/carddisp.pl?gene=PANK2
POMGNT1	Protein O-Linked Mannose N-Acetylglucosaminyltransferase 1 (Beta 1,2-)	Protein Coding	Q8WZA1	57	GC01M046188	61.2476	https://www.genecards.org/cgi-bin/carddisp.pl?gene=POMGNT1
MAPT	Microtubule Associated Protein Tau	Protein Coding	P10636	63	GC17P045894	56.0842	https://www.genecards.org/cgi-bin/carddisp.pl?gene=MAPT
COL4A1	Collagen Type IV Alpha 1 Chain	Protein Coding	P02462	60	GC13M110148	55.4018	https://www.genecards.org/cgi-bin/carddisp.pl?gene=COL4A1
DAG1	Dystroglycan 1	Protein Coding	Q14118	59	GC03P059881	54.0485	https://www.genecards.org/cgi-bin/carddisp.pl?gene=DAG1
APOE	Apolipoprotein E	Protein Coding	P02649	63	GC19P123244	53.6859	https://www.genecards.org/cgi-bin/carddisp.pl?gene=APOE
PSEN1	Presenilin 1	Protein Coding	P49768	66	GC14P073136	53.2525	https://www.genecards.org/cgi-bin/carddisp.pl?gene=PSEN1
B3GALNT2	Beta-1,3-N-Acetylgalactosaminyltransferase 2	Protein Coding	Q8NCR0	52	GC01M235440	53.2056	https://www.genecards.org/cgi-bin/carddisp.pl?gene=B3GALNT2
CRPPA	CDP-L-Ribitol Pyrophosphorylase A	Protein Coding	A4D126	50	GC07M016088	51.8082	https://www.genecards.org/cgi-bin/carddisp.pl?gene=CRPPA
GFAP	Glial Fibrillary Acidic Protein	Protein Coding	P14136	61	GC17M085348	50.7779	https://www.genecards.org/cgi-bin/carddisp.pl?gene=GFAP
IL6	Interleukin 6	Protein Coding	P05231	64	GC07P022725	49.6837	https://www.genecards.org/cgi-bin/carddisp.pl?gene=IL6
PIK3CA	Phosphatidylinositol-4,5-Bisphosphate 3-Kinase Catalytic Subunit Alpha	Protein Coding	P42336	66	GC03P179148	49.3727	https://www.genecards.org/cgi-bin/carddisp.pl?gene=PIK3CA
APP	Amyloid Beta Precursor Protein	Protein Coding	P05067	63	GC21M025880	48.9425	https://www.genecards.org/cgi-bin/carddisp.pl?gene=APP
FKRP	Fukutin Related Protein	Protein Coding	Q9H9S5	52	GC19P123289	48.9396	https://www.genecards.org/cgi-bin/carddisp.pl?gene=FKRP
FKTN	Fukutin	Protein Coding	O75072	53	GC09P105558	47.6524	https://www.genecards.org/cgi-bin/carddisp.pl?gene=FKTN
GMPPB	GDP-Mannose Pyrophosphorylase B	Protein Coding	Q9Y5P6	56	GC03M049716	47.0779	https://www.genecards.org/cgi-bin/carddisp.pl?gene=GMPPB
WDR45	WD Repeat Domain 45	Protein Coding	Q9Y484	53	GC0XM049074	47.0726	https://www.genecards.org/cgi-bin/carddisp.pl?gene=WDR45
GLUL	Glutamate-Ammonia Ligase	Protein Coding	P15104	61	GC01M182378	46.3168	https://www.genecards.org/cgi-bin/carddisp.pl?gene=GLUL
PTEN	Phosphatase And Tensin Homolog	Protein Coding	P60484	65	GC10P112611	46.1316	https://www.genecards.org/cgi-bin/carddisp.pl?gene=PTEN
TNF	Tumor Necrosis Factor	Protein Coding	P01375	65	GC06P144764	46.1175	https://www.genecards.org/cgi-bin/carddisp.pl?gene=TNF
SLC2A1	Solute Carrier Family 2 Member 1	Protein Coding	P11166	66	GC01M042925	45.4563	https://www.genecards.org/cgi-bin/carddisp.pl?gene=SLC2A1
GAD1	Glutamate Decarboxylase 1	Protein Coding	Q99259	63	GC02P170813	45.3427	https://www.genecards.org/cgi-bin/carddisp.pl?gene=GAD1
EGFR	Epidermal Growth Factor Receptor	Protein Coding	P00533	68	GC07P055019	44.1856	https://www.genecards.org/cgi-bin/carddisp.pl?gene=EGFR
AFG2A	AFG2 AAA ATPase Homolog A	Protein Coding	Q8NB90	54	GC04P122923	43.3871	https://www.genecards.org/cgi-bin/carddisp.pl?gene=AFG2A
POMGNT2	Protein O-Linked Mannose N-Acetylglucosaminyltransferase 2 (Beta 1,4-)	Protein Coding	Q8NAT1	50	GC03M043121	42.9958	https://www.genecards.org/cgi-bin/carddisp.pl?gene=POMGNT2
COL4A2	Collagen Type IV Alpha 2 Chain	Protein Coding	P08572	59	GC13P110305	42.8108	https://www.genecards.org/cgi-bin/carddisp.pl?gene=COL4A2
POMT1	Protein O-Mannosyltransferase 1	Protein Coding	Q9Y6A1	57	GC09P131502	42.4097	https://www.genecards.org/cgi-bin/carddisp.pl?gene=POMT1
ADGRG1	Adhesion G Protein-Coupled Receptor G1	Protein Coding	Q9Y653	55	GC16P057610	42.2476	https://www.genecards.org/cgi-bin/carddisp.pl?gene=ADGRG1
CTNNB1	Catenin Beta 1	Protein Coding	P35222	66	GC03P041194	42.0223	https://www.genecards.org/cgi-bin/carddisp.pl?gene=CTNNB1
NPPB	Natriuretic Peptide B	Protein Coding	P16860	56	GC01M015389	41.9339	https://www.genecards.org/cgi-bin/carddisp.pl?gene=NPPB
COASY	Coenzyme A Synthase	Protein Coding	Q13057	57	GC17P042561	41.2974	https://www.genecards.org/cgi-bin/carddisp.pl?gene=COASY
LARGE1	LARGE Xylosyl- And Glucuronyltransferase 1	Protein Coding	O95461	54	GC22M079246	40.4885	https://www.genecards.org/cgi-bin/carddisp.pl?gene=LARGE1
BRAF	B-Raf Proto-Oncogene, Serine/Threonine Kinase	Protein Coding	P15056	67	GC07M140778	39.948	https://www.genecards.org/cgi-bin/carddisp.pl?gene=BRAF
TSPAN1	Tetraspanin 1	Protein Coding	O60635	52	GC01P046175	39.8008	https://www.genecards.org/cgi-bin/carddisp.pl?gene=TSPAN1
SNCA	Synuclein Alpha	Protein Coding	P37840	64	GC04M089724	39.6505	https://www.genecards.org/cgi-bin/carddisp.pl?gene=SNCA
C19orf12	Chromosome 19 Open Reading Frame 12	Protein Coding	Q9NSK7	48	GC19M096705	39.4892	https://www.genecards.org/cgi-bin/carddisp.pl?gene=C19orf12
NTRK2	Neurotrophic Receptor Tyrosine Kinase 2	Protein Coding	Q16620	66	GC09P084668	39.1725	https://www.genecards.org/cgi-bin/carddisp.pl?gene=NTRK2
TUBB3	Tubulin Beta 3 Class III	Protein Coding	Q13509	63	GC16P098856	38.6372	https://www.genecards.org/cgi-bin/carddisp.pl?gene=TUBB3
TSC2	TSC Complex Subunit 2	Protein Coding	P49815	64	GC16P095809	38.488	https://www.genecards.org/cgi-bin/carddisp.pl?gene=TSC2
SMARCB1	SWI/SNF Related, Matrix Associated, Actin Dependent Regulator Of Chromatin, Subfamily B, Member 1	Protein Coding	Q12824	59	GC22P023786	38.423	https://www.genecards.org/cgi-bin/carddisp.pl?gene=SMARCB1
TUBB2B	Tubulin Beta 2B Class IIb	Protein Coding	Q9BVA1	56	GC06M003841	37.126	https://www.genecards.org/cgi-bin/carddisp.pl?gene=TUBB2B
DYNC1H1	Dynein Cytoplasmic 1 Heavy Chain 1	Protein Coding	Q14204	58	GC14P116947	35.9698	https://www.genecards.org/cgi-bin/carddisp.pl?gene=DYNC1H1
IL10	Interleukin 10	Protein Coding	P22301	60	GC01M206767	35.9599	https://www.genecards.org/cgi-bin/carddisp.pl?gene=IL10
POMK	Protein O-Mannose Kinase	Protein Coding	Q9H5K3	48	GC08P043093	35.3891	https://www.genecards.org/cgi-bin/carddisp.pl?gene=POMK
CSF1R	Colony Stimulating Factor 1 Receptor	Protein Coding	P07333	65	GC05M150053	35.1269	https://www.genecards.org/cgi-bin/carddisp.pl?gene=CSF1R
AKT1	AKT Serine/Threonine Kinase 1	Protein Coding	P31749	66	GC14M104769	34.985	https://www.genecards.org/cgi-bin/carddisp.pl?gene=AKT1
SMC3	Structural Maintenance Of Chromosomes 3	Protein Coding	Q9UQE7	60	GC10P110567	34.9778	https://www.genecards.org/cgi-bin/carddisp.pl?gene=SMC3
FTL	Ferritin Light Chain	Protein Coding	P02792	59	GC19P048965	34.6327	https://www.genecards.org/cgi-bin/carddisp.pl?gene=FTL
TGFB1	Transforming Growth Factor Beta 1	Protein Coding	P01137	66	GC19M041301	34.4847	https://www.genecards.org/cgi-bin/carddisp.pl?gene=TGFB1
PGAP1	Post-GPI Attachment To Proteins Inositol Deacylase 1	Protein Coding	Q75T13	55	GC02M196833	34.1901	https://www.genecards.org/cgi-bin/carddisp.pl?gene=PGAP1
TSC1	TSC Complex Subunit 1	Protein Coding	Q92574	61	GC09M132891	34.0893	https://www.genecards.org/cgi-bin/carddisp.pl?gene=TSC1
SLC6A4	Solute Carrier Family 6 Member 4	Protein Coding	P31645	61	GC17M030194	33.8906	https://www.genecards.org/cgi-bin/carddisp.pl?gene=SLC6A4
B4GAT1	Beta-1,4-Glucuronyltransferase 1	Protein Coding	O43505	49	GC11M066345	33.5909	https://www.genecards.org/cgi-bin/carddisp.pl?gene=B4GAT1
IFNG	Interferon Gamma	Protein Coding	P01579	63	GC12M068154	33.5466	https://www.genecards.org/cgi-bin/carddisp.pl?gene=IFNG
MTOR	Mechanistic Target Of Rapamycin Kinase	Protein Coding	P42345	68	GC01M011106	33.3562	https://www.genecards.org/cgi-bin/carddisp.pl?gene=MTOR
IDH1	Isocitrate Dehydrogenase (NADP(+)) 1	Protein Coding	O75874	66	GC02M208236	32.9562	https://www.genecards.org/cgi-bin/carddisp.pl?gene=IDH1
BMP4	Bone Morphogenetic Protein 4	Protein Coding	P12644	62	GC14M053949	32.8637	https://www.genecards.org/cgi-bin/carddisp.pl?gene=BMP4
CACNA1A	Calcium Voltage-Gated Channel Subunit Alpha1 A	Protein Coding	O00555	60	GC19M013206	32.8398	https://www.genecards.org/cgi-bin/carddisp.pl?gene=CACNA1A
RERE	Arginine-Glutamic Acid Dipeptide Repeats	Protein Coding	Q9P2R6	55	GC01M015250	32.6743	https://www.genecards.org/cgi-bin/carddisp.pl?gene=RERE
PRKN	Parkin RBR E3 Ubiquitin Protein Ligase	Protein Coding	O60260	62	GC06M161348	32.6662	https://www.genecards.org/cgi-bin/carddisp.pl?gene=PRKN
SMC1A	Structural Maintenance Of Chromosomes 1A	Protein Coding	Q14683	61	GC0XM053374	32.5486	https://www.genecards.org/cgi-bin/carddisp.pl?gene=SMC1A
F2	Coagulation Factor II, Thrombin	Protein Coding	P00734	63	GC11P048054	32.3993	https://www.genecards.org/cgi-bin/carddisp.pl?gene=F2
TH	Tyrosine Hydroxylase	Protein Coding	P07101	63	GC11M002163	32.383	https://www.genecards.org/cgi-bin/carddisp.pl?gene=TH
TUBB	Tubulin Beta Class I	Protein Coding	P07437	62	GC06P144741	32.2213	https://www.genecards.org/cgi-bin/carddisp.pl?gene=TUBB
KIF5C	Kinesin Family Member 5C	Protein Coding	O60282	54	GC02P148875	32.2031	https://www.genecards.org/cgi-bin/carddisp.pl?gene=KIF5C
TBCD	Tubulin Folding Cofactor D	Protein Coding	Q9BTW9	52	GC17P082752	32.1692	https://www.genecards.org/cgi-bin/carddisp.pl?gene=TBCD
PTPN11	Protein Tyrosine Phosphatase Non-Receptor Type 11	Protein Coding	Q06124	67	GC12P112418	32.152	https://www.genecards.org/cgi-bin/carddisp.pl?gene=PTPN11
MAPK8IP3	Mitogen-Activated Protein Kinase 8 Interacting Protein 3	Protein Coding	Q9UPT6	54	GC16P001706	31.9905	https://www.genecards.org/cgi-bin/carddisp.pl?gene=MAPK8IP3
GRIN2B	Glutamate Ionotropic Receptor NMDA Type Subunit 2B	Protein Coding	Q13224	65	GC12M013437	31.9832	https://www.genecards.org/cgi-bin/carddisp.pl?gene=GRIN2B
SOD1	Superoxide Dismutase 1	Protein Coding	P00441	66	GC21P031659	31.956	https://www.genecards.org/cgi-bin/carddisp.pl?gene=SOD1
IDH2	Isocitrate Dehydrogenase (NADP(+)) 2	Protein Coding	P48735	66	GC15M090083	31.9478	https://www.genecards.org/cgi-bin/carddisp.pl?gene=IDH2
TUBB2A	Tubulin Beta 2A Class IIa	Protein Coding	Q13885	59	GC06M003153	31.8652	https://www.genecards.org/cgi-bin/carddisp.pl?gene=TUBB2A
INS	Insulin	Protein Coding	P01308	60	GC11M002159	31.8627	https://www.genecards.org/cgi-bin/carddisp.pl?gene=INS
FOXG1	Forkhead Box G1	Protein Coding	P55316	57	GC14P048061	31.7395	https://www.genecards.org/cgi-bin/carddisp.pl?gene=FOXG1
IL1B	Interleukin 1 Beta	Protein Coding	P01584	60	GC02M112829	31.7262	https://www.genecards.org/cgi-bin/carddisp.pl?gene=IL1B
IGF1	Insulin Like Growth Factor 1	Protein Coding	P05019	61	GC12M102395	31.6772	https://www.genecards.org/cgi-bin/carddisp.pl?gene=IGF1
ACTB	Actin Beta	Protein Coding	P60709	63	GC07M005549	31.6279	https://www.genecards.org/cgi-bin/carddisp.pl?gene=ACTB
KRAS	KRAS Proto-Oncogene, GTPase	Protein Coding	P01116	66	GC12M031027	31.4943	https://www.genecards.org/cgi-bin/carddisp.pl?gene=KRAS
POLG	DNA Polymerase Gamma, Catalytic Subunit	Protein Coding	P54098	60	GC15M152330	31.4191	https://www.genecards.org/cgi-bin/carddisp.pl?gene=POLG
DARS2	Aspartyl-TRNA Synthetase 2, Mitochondrial	Protein Coding	Q6PI48	55	GC01P173824	31.4188	https://www.genecards.org/cgi-bin/carddisp.pl?gene=DARS2
COMT	Catechol-O-Methyltransferase	Protein Coding	P21964	64	GC22P019941	31.2937	https://www.genecards.org/cgi-bin/carddisp.pl?gene=COMT
FGFR1	Fibroblast Growth Factor Receptor 1	Protein Coding	P11362	68	GC08M038400	31.2126	https://www.genecards.org/cgi-bin/carddisp.pl?gene=FGFR1
DCX	Doublecortin	Protein Coding	O43602	59	GC0XM111293	30.8461	https://www.genecards.org/cgi-bin/carddisp.pl?gene=DCX
H19	H19 Imprinted Maternally Expressed Transcript	RNA Gene		36	GC11M001995	30.7119	https://www.genecards.org/cgi-bin/carddisp.pl?gene=H19
NKX2-1	NK2 Homeobox 1	Protein Coding	P43699	61	GC14M036516	30.5143	https://www.genecards.org/cgi-bin/carddisp.pl?gene=NKX2-1
CCL2	C-C Motif Chemokine Ligand 2	Protein Coding	P13500	62	GC17P034255	30.5098	https://www.genecards.org/cgi-bin/carddisp.pl?gene=CCL2
RAD21	RAD21 Cohesin Complex Component	Protein Coding	O60216	58	GC08M116846	30.4418	https://www.genecards.org/cgi-bin/carddisp.pl?gene=RAD21
GRIN1	Glutamate Ionotropic Receptor NMDA Type Subunit 1	Protein Coding	Q05586	63	GC09P137138	30.4148	https://www.genecards.org/cgi-bin/carddisp.pl?gene=GRIN1
TUBA1A	Tubulin Alpha 1a	Protein Coding	Q71U36	62	GC12M049184	30.4076	https://www.genecards.org/cgi-bin/carddisp.pl?gene=TUBA1A
CASP3	Caspase 3	Protein Coding	P42574	62	GC04M184627	30.3586	https://www.genecards.org/cgi-bin/carddisp.pl?gene=CASP3
JAM3	Junctional Adhesion Molecule 3	Protein Coding	Q9BX67	56	GC11P134076	30.3483	https://www.genecards.org/cgi-bin/carddisp.pl?gene=JAM3
MTHFR	Methylenetetrahydrofolate Reductase	Protein Coding	P42898	61	GC01M011785	30.3097	https://www.genecards.org/cgi-bin/carddisp.pl?gene=MTHFR
PDGFRB	Platelet Derived Growth Factor Receptor Beta	Protein Coding	P09619	66	GC05M150113	30.1498	https://www.genecards.org/cgi-bin/carddisp.pl?gene=PDGFRB
SMAD5-AS1	SMAD5 Antisense RNA 1	RNA Gene	Q9Y6J3	31	GC05M136129	30.0373	https://www.genecards.org/cgi-bin/carddisp.pl?gene=SMAD5-AS1
PLP1	Proteolipid Protein 1	Protein Coding	P60201	56	GC0XP103773	30.0299	https://www.genecards.org/cgi-bin/carddisp.pl?gene=PLP1
MECP2	Methyl-CpG Binding Protein 2	Protein Coding	P51608	59	GC0XM154021	30.0221	https://www.genecards.org/cgi-bin/carddisp.pl?gene=MECP2
SLC6A3	Solute Carrier Family 6 Member 3	Protein Coding	Q01959	64	GC05M001392	29.948	https://www.genecards.org/cgi-bin/carddisp.pl?gene=SLC6A3
VWF	Von Willebrand Factor	Protein Coding	P04275	60	GC12M030626	29.9007	https://www.genecards.org/cgi-bin/carddisp.pl?gene=VWF
MFSD2A	MFSD2 Lysolipid Transporter A, Lysophospholipid	Protein Coding	Q8NA29	54	GC01P039955	29.88	https://www.genecards.org/cgi-bin/carddisp.pl?gene=MFSD2A
MAPK1	Mitogen-Activated Protein Kinase 1	Protein Coding	P28482	66	GC22M021759	29.8773	https://www.genecards.org/cgi-bin/carddisp.pl?gene=MAPK1
TBR1	T-Box Brain Transcription Factor 1	Protein Coding	Q16650	54	GC02P161416	29.8748	https://www.genecards.org/cgi-bin/carddisp.pl?gene=TBR1
GCDH	Glutaryl-CoA Dehydrogenase	Protein Coding	Q92947	58	GC19P012891	29.8687	https://www.genecards.org/cgi-bin/carddisp.pl?gene=GCDH
PRNP	Prion Protein (Kanno Blood Group)	Protein Coding	F7VJQ1	61	GC20P004686	29.7593	https://www.genecards.org/cgi-bin/carddisp.pl?gene=PRNP
NF1	Neurofibromin 1	Protein Coding	P21359	60	GC17P031094	29.7466	https://www.genecards.org/cgi-bin/carddisp.pl?gene=NF1
ACE	Angiotensin I Converting Enzyme	Protein Coding	P12821	64	GC17P063477	29.7453	https://www.genecards.org/cgi-bin/carddisp.pl?gene=ACE
S100B	S100 Calcium Binding Protein B	Protein Coding	P04271	58	GC21M053916	29.7203	https://www.genecards.org/cgi-bin/carddisp.pl?gene=S100B
SHH	Sonic Hedgehog Signaling Molecule	Protein Coding	Q15465	64	GC07M155799	29.6737	https://www.genecards.org/cgi-bin/carddisp.pl?gene=SHH
PAFAH1B1	Platelet Activating Factor Acetylhydrolase 1b Regulatory Subunit 1	Protein Coding	P43034	59	GC17P002593	29.6579	https://www.genecards.org/cgi-bin/carddisp.pl?gene=PAFAH1B1
SLC1A3	Solute Carrier Family 1 Member 3	Protein Coding	P43003	62	GC05P036702	29.5944	https://www.genecards.org/cgi-bin/carddisp.pl?gene=SLC1A3
SYP	Synaptophysin	Protein Coding	P08247	59	GC0XM049187	29.5085	https://www.genecards.org/cgi-bin/carddisp.pl?gene=SYP
GDNF	Glial Cell Derived Neurotrophic Factor	Protein Coding	P39905	63	GC05M037812	29.4165	https://www.genecards.org/cgi-bin/carddisp.pl?gene=GDNF
LAMA2	Laminin Subunit Alpha 2	Protein Coding	P24043	56	GC06P146205	29.3463	https://www.genecards.org/cgi-bin/carddisp.pl?gene=LAMA2
PIK3R1	Phosphoinositide-3-Kinase Regulatory Subunit 1	Protein Coding	P27986	64	GC05P068215	29.3409	https://www.genecards.org/cgi-bin/carddisp.pl?gene=PIK3R1
ENO2	Enolase 2	Protein Coding	P09104	60	GC12P006913	29.3368	https://www.genecards.org/cgi-bin/carddisp.pl?gene=ENO2
SCN1A	Sodium Voltage-Gated Channel Alpha Subunit 1	Protein Coding	P35498	60	GC02M165989	29.3358	https://www.genecards.org/cgi-bin/carddisp.pl?gene=SCN1A
AKT3	AKT Serine/Threonine Kinase 3	Protein Coding	Q9Y243	68	GC01M243488	29.1833	https://www.genecards.org/cgi-bin/carddisp.pl?gene=AKT3
NGF	Nerve Growth Factor	Protein Coding	P01138	64	GC01M115285	29.0438	https://www.genecards.org/cgi-bin/carddisp.pl?gene=NGF
MBP	Myelin Basic Protein	Protein Coding	P02686	58	GC18M076978	29.0065	https://www.genecards.org/cgi-bin/carddisp.pl?gene=MBP
SOX2	SRY-Box Transcription Factor 2	Protein Coding	P48431	59	GC03P181711	28.9969	https://www.genecards.org/cgi-bin/carddisp.pl?gene=SOX2
NOTCH3	Notch Receptor 3	Protein Coding	Q9UM47	64	GC19M015159	28.9804	https://www.genecards.org/cgi-bin/carddisp.pl?gene=NOTCH3
FMR1	Fragile X Messenger Ribonucleoprotein 1	Protein Coding	Q06787	57	GC0XP148000	28.9425	https://www.genecards.org/cgi-bin/carddisp.pl?gene=FMR1
TREM2	Triggering Receptor Expressed On Myeloid Cells 2	Protein Coding	Q9NZC2	57	GC06M097308	28.9184	https://www.genecards.org/cgi-bin/carddisp.pl?gene=TREM2
PTCH1	Patched 1	Protein Coding	Q13635	64	GC09M095442	28.8872	https://www.genecards.org/cgi-bin/carddisp.pl?gene=PTCH1
RELN	Reelin	Protein Coding	P78509	57	GC07M103471	28.8613	https://www.genecards.org/cgi-bin/carddisp.pl?gene=RELN
NOS2	Nitric Oxide Synthase 2	Protein Coding	P35228	62	GC17M027756	28.6711	https://www.genecards.org/cgi-bin/carddisp.pl?gene=NOS2
SOD2-OT1	SOD2 Overlapping Transcript 1	RNA Gene		21	GC06M159772	28.6526	https://www.genecards.org/cgi-bin/carddisp.pl?gene=SOD2-OT1
MAOA	Monoamine Oxidase A	Protein Coding	P21397	62	GC0XP043654	28.6411	https://www.genecards.org/cgi-bin/carddisp.pl?gene=MAOA
PSAP	Prosaposin	Protein Coding	P07602	61	GC10M071816	28.5121	https://www.genecards.org/cgi-bin/carddisp.pl?gene=PSAP
ABCB1	ATP Binding Cassette Subfamily B Member 1	Protein Coding	P08183	64	GC07M087504	28.5008	https://www.genecards.org/cgi-bin/carddisp.pl?gene=ABCB1
FGFR2	Fibroblast Growth Factor Receptor 2	Protein Coding	P21802	68	GC10M121478	28.4792	https://www.genecards.org/cgi-bin/carddisp.pl?gene=FGFR2
CKB	Creatine Kinase B	Protein Coding	P12277	58	GC14M103519	28.4624	https://www.genecards.org/cgi-bin/carddisp.pl?gene=CKB
AQP4	Aquaporin 4	Protein Coding	P55087	59	GC18M026852	28.3634	https://www.genecards.org/cgi-bin/carddisp.pl?gene=AQP4
MMP9	Matrix Metallopeptidase 9	Protein Coding	P14780	66	GC20P046008	28.2957	https://www.genecards.org/cgi-bin/carddisp.pl?gene=MMP9
GRN	Granulin Precursor	Protein Coding	P28799	60	GC17P044345	28.2394	https://www.genecards.org/cgi-bin/carddisp.pl?gene=GRN
DLL1	Delta Like Canonical Notch Ligand 1	Protein Coding	O00548	57	GC06M170282	28.2359	https://www.genecards.org/cgi-bin/carddisp.pl?gene=DLL1
NRAS	NRAS Proto-Oncogene, GTPase	Protein Coding	P01111	63	GC01M114704	28.1233	https://www.genecards.org/cgi-bin/carddisp.pl?gene=NRAS
CBS	Cystathionine Beta-Synthase	Protein Coding	P35520	64	GC21M043053	28.0399	https://www.genecards.org/cgi-bin/carddisp.pl?gene=CBS
SMARCA4	SWI/SNF Related, Matrix Associated, Actin Dependent Regulator Of Chromatin, Subfamily A, Member 4	Protein Coding	P51532	64	GC19P122306	27.9596	https://www.genecards.org/cgi-bin/carddisp.pl?gene=SMARCA4
SCN2A	Sodium Voltage-Gated Channel Alpha Subunit 2	Protein Coding	Q99250	61	GC02P165194	27.9269	https://www.genecards.org/cgi-bin/carddisp.pl?gene=SCN2A
UCHL1	Ubiquitin C-Terminal Hydrolase L1	Protein Coding	P09936	66	GC04P041256	27.7892	https://www.genecards.org/cgi-bin/carddisp.pl?gene=UCHL1
CXCL8	C-X-C Motif Chemokine Ligand 8	Protein Coding	P10145	56	GC04P073740	27.6905	https://www.genecards.org/cgi-bin/carddisp.pl?gene=CXCL8
GBA1	Glucosylceramidase Beta 1	Protein Coding	P04062	63	GC01M163977	27.6902	https://www.genecards.org/cgi-bin/carddisp.pl?gene=GBA1
SQSTM1	Sequestosome 1	Protein Coding	Q13501	62	GC05P179806	27.6516	https://www.genecards.org/cgi-bin/carddisp.pl?gene=SQSTM1
GALC	Galactosylceramidase	Protein Coding	P54803	58	GC14M087837	27.5692	https://www.genecards.org/cgi-bin/carddisp.pl?gene=GALC
GNAO1	G Protein Subunit Alpha O1	Protein Coding	P09471	59	GC16P097311	27.4948	https://www.genecards.org/cgi-bin/carddisp.pl?gene=GNAO1
KIF2A	Kinesin Family Member 2A	Protein Coding	O00139	56	GC05P062306	27.4094	https://www.genecards.org/cgi-bin/carddisp.pl?gene=KIF2A
TUBG1	Tubulin Gamma 1	Protein Coding	P23258	61	GC17P042609	27.3838	https://www.genecards.org/cgi-bin/carddisp.pl?gene=TUBG1
SDHB	Succinate Dehydrogenase Complex Iron Sulfur Subunit B	Protein Coding	P21912	62	GC01M019397	27.3595	https://www.genecards.org/cgi-bin/carddisp.pl?gene=SDHB
HK1	Hexokinase 1	Protein Coding	P19367	63	GC10P069269	27.3442	https://www.genecards.org/cgi-bin/carddisp.pl?gene=HK1
PI4KA	Phosphatidylinositol 4-Kinase Alpha	Protein Coding	P42356	61	GC22M020707	27.3414	https://www.genecards.org/cgi-bin/carddisp.pl?gene=PI4KA
SPTAN1	Spectrin Alpha, Non-Erythrocytic 1	Protein Coding	Q13813	62	GC09P128552	27.327	https://www.genecards.org/cgi-bin/carddisp.pl?gene=SPTAN1
PDGFB	Platelet Derived Growth Factor Subunit B	Protein Coding	P01127	64	GC22M080187	27.3183	https://www.genecards.org/cgi-bin/carddisp.pl?gene=PDGFB
TARDBP	TAR DNA Binding Protein	Protein Coding	Q13148	60	GC01P051196	27.261	https://www.genecards.org/cgi-bin/carddisp.pl?gene=TARDBP
TRAPPC9	Trafficking Protein Particle Complex Subunit 9	Protein Coding	Q96Q05	51	GC08M139728	27.2205	https://www.genecards.org/cgi-bin/carddisp.pl?gene=TRAPPC9
TBCE	Tubulin Folding Cofactor E	Protein Coding	Q15813	53	GC01P235367	27.2097	https://www.genecards.org/cgi-bin/carddisp.pl?gene=TBCE
CP	Ceruloplasmin	Protein Coding	P00450	61	GC03M149162	27.1469	https://www.genecards.org/cgi-bin/carddisp.pl?gene=CP
SLC18A2	Solute Carrier Family 18 Member A2	Protein Coding	Q05940	60	GC10P117241	27.1273	https://www.genecards.org/cgi-bin/carddisp.pl?gene=SLC18A2
CDK5	Cyclin Dependent Kinase 5	Protein Coding	Q00535	66	GC07M151053	27.0854	https://www.genecards.org/cgi-bin/carddisp.pl?gene=CDK5
SLC1A2	Solute Carrier Family 1 Member 2	Protein Coding	P43004	63	GC11M035267	27.0777	https://www.genecards.org/cgi-bin/carddisp.pl?gene=SLC1A2
ALK	ALK Receptor Tyrosine Kinase	Protein Coding	Q9UM73	64	GC02M029190	27.0055	https://www.genecards.org/cgi-bin/carddisp.pl?gene=ALK
ICAM1	Intercellular Adhesion Molecule 1	Protein Coding	P05362	63	GC19P122290	27.0008	https://www.genecards.org/cgi-bin/carddisp.pl?gene=ICAM1
TCF4	Transcription Factor 4	Protein Coding	P15884	60	GC18M055222	26.8608	https://www.genecards.org/cgi-bin/carddisp.pl?gene=TCF4
LEP	Leptin	Protein Coding	P41159	59	GC07P128241	26.8404	https://www.genecards.org/cgi-bin/carddisp.pl?gene=LEP
ATP13A2	ATPase Cation Transporting 13A2	Protein Coding	Q9NQ11	56	GC01M016985	26.7756	https://www.genecards.org/cgi-bin/carddisp.pl?gene=ATP13A2
DNM1	Dynamin 1	Protein Coding	Q05193	62	GC09P128191	26.7701	https://www.genecards.org/cgi-bin/carddisp.pl?gene=DNM1
BCL2	BCL2 Apoptosis Regulator	Protein Coding	P10415	64	GC18M063123	26.6168	https://www.genecards.org/cgi-bin/carddisp.pl?gene=BCL2
ZEB2	Zinc Finger E-Box Binding Homeobox 2	Protein Coding	O60315	61	GC02M144384	26.6116	https://www.genecards.org/cgi-bin/carddisp.pl?gene=ZEB2
NOS3	Nitric Oxide Synthase 3	Protein Coding	P29474	63	GC07P159858	26.6084	https://www.genecards.org/cgi-bin/carddisp.pl?gene=NOS3
FA2H	Fatty Acid 2-Hydroxylase	Protein Coding	Q7L5A8	56	GC16M074712	26.5728	https://www.genecards.org/cgi-bin/carddisp.pl?gene=FA2H
NAXE	NAD(P)HX Epimerase	Protein Coding	Q8NCW5	54	GC01P156591	26.403	https://www.genecards.org/cgi-bin/carddisp.pl?gene=NAXE
HRAS	HRas Proto-Oncogene, GTPase	Protein Coding	P01112	65	GC11M012501	26.401	https://www.genecards.org/cgi-bin/carddisp.pl?gene=HRAS
SNORD118	Small Nucleolar RNA, C/D Box 118	RNA Gene		28	GC17M084187	26.3898	https://www.genecards.org/cgi-bin/carddisp.pl?gene=SNORD118
TLR4	Toll Like Receptor 4	Protein Coding	O00206	64	GC09P117704	26.3718	https://www.genecards.org/cgi-bin/carddisp.pl?gene=TLR4
VEGFA	Vascular Endothelial Growth Factor A	Protein Coding	P15692	61	GC06P043770	26.3717	https://www.genecards.org/cgi-bin/carddisp.pl?gene=VEGFA
MPO	Myeloperoxidase	Protein Coding	P05164	66	GC17M058269	26.3237	https://www.genecards.org/cgi-bin/carddisp.pl?gene=MPO
SFTA3	Surfactant Associated 3	RNA Gene	P0C7M3	44	GC14M036479	26.318	https://www.genecards.org/cgi-bin/carddisp.pl?gene=SFTA3
CERNA3	Competing Endogenous LncRNA 3 For MiR-645	RNA Gene		21	GC08P056352	26.2946	https://www.genecards.org/cgi-bin/carddisp.pl?gene=CERNA3
NFIA	Nuclear Factor I A	Protein Coding	Q12857	56	GC01P060865	26.2519	https://www.genecards.org/cgi-bin/carddisp.pl?gene=NFIA
MPDZ	Multiple PDZ Domain Crumbs Cell Polarity Complex Component	Protein Coding	O75970	55	GC09M013105	26.2172	https://www.genecards.org/cgi-bin/carddisp.pl?gene=MPDZ
HTR1A	5-Hydroxytryptamine Receptor 1A	Protein Coding	P08908	59	GC05M063960	26.1773	https://www.genecards.org/cgi-bin/carddisp.pl?gene=HTR1A
ALB	Albumin	Protein Coding	P02768	62	GC04P073397	26.162	https://www.genecards.org/cgi-bin/carddisp.pl?gene=ALB
NTRK1	Neurotrophic Receptor Tyrosine Kinase 1	Protein Coding	P04629	62	GC01P156815	26.0069	https://www.genecards.org/cgi-bin/carddisp.pl?gene=NTRK1
CRP	C-Reactive Protein	Protein Coding	P02741	59	GC01M164127	25.9983	https://www.genecards.org/cgi-bin/carddisp.pl?gene=CRP
NOS1	Nitric Oxide Synthase 1	Protein Coding	P29475	62	GC12M117208	25.9515	https://www.genecards.org/cgi-bin/carddisp.pl?gene=NOS1
OCLN	Occludin	Protein Coding	Q16625	58	GC05P069492	25.9076	https://www.genecards.org/cgi-bin/carddisp.pl?gene=OCLN
GRM7	Glutamate Metabotropic Receptor 7	Protein Coding	Q14831	58	GC03P006770	25.8786	https://www.genecards.org/cgi-bin/carddisp.pl?gene=GRM7
ATM	ATM Serine/Threonine Kinase	Protein Coding	Q13315	66	GC11P108223	25.8387	https://www.genecards.org/cgi-bin/carddisp.pl?gene=ATM
TTR	Transthyretin	Protein Coding	P02766	61	GC18P031557	25.7233	https://www.genecards.org/cgi-bin/carddisp.pl?gene=TTR
PSEN2	Presenilin 2	Protein Coding	P49810	62	GC01P226870	25.7201	https://www.genecards.org/cgi-bin/carddisp.pl?gene=PSEN2
RXYLT1	Ribitol Xylosyltransferase 1	Protein Coding	Q9Y2B1	48	GC12P063779	25.7101	https://www.genecards.org/cgi-bin/carddisp.pl?gene=RXYLT1
H3-3A	H3.3 Histone A	Protein Coding	P84243	55	GC01P226062	25.6788	https://www.genecards.org/cgi-bin/carddisp.pl?gene=H3-3A
PDYN	Prodynorphin	Protein Coding	P01213	58	GC20M001978	25.6548	https://www.genecards.org/cgi-bin/carddisp.pl?gene=PDYN
LRRK2	Leucine Rich Repeat Kinase 2	Protein Coding	Q5S007	62	GC12P040196	25.616	https://www.genecards.org/cgi-bin/carddisp.pl?gene=LRRK2
LRP1	LDL Receptor Related Protein 1	Protein Coding	Q07954	61	GC12P057128	25.6028	https://www.genecards.org/cgi-bin/carddisp.pl?gene=LRP1
EGF	Epidermal Growth Factor	Protein Coding	P01133	64	GC04P109912	25.5653	https://www.genecards.org/cgi-bin/carddisp.pl?gene=EGF
CDKN1B	Cyclin Dependent Kinase Inhibitor 1B	Protein Coding	P46527	62	GC12P043095	25.5596	https://www.genecards.org/cgi-bin/carddisp.pl?gene=CDKN1B
RAC1	Rac Family Small GTPase 1	Protein Coding	P63000	62	GC07P013892	25.5372	https://www.genecards.org/cgi-bin/carddisp.pl?gene=RAC1
DNM1L	Dynamin 1 Like	Protein Coding	O00429	61	GC12P032679	25.5361	https://www.genecards.org/cgi-bin/carddisp.pl?gene=DNM1L
SUFU	SUFU Negative Regulator Of Hedgehog Signaling	Protein Coding	Q9UMX1	55	GC10P113124	25.4757	https://www.genecards.org/cgi-bin/carddisp.pl?gene=SUFU
SOX10	SRY-Box Transcription Factor 10	Protein Coding	P56693	58	GC22M081070	25.4656	https://www.genecards.org/cgi-bin/carddisp.pl?gene=SOX10
GLS	Glutaminase	Protein Coding	O94925	62	GC02P190880	25.4368	https://www.genecards.org/cgi-bin/carddisp.pl?gene=GLS
WDR81	WD Repeat Domain 81	Protein Coding	Q562E7	50	GC17P001716	25.3887	https://www.genecards.org/cgi-bin/carddisp.pl?gene=WDR81
CDH2	Cadherin 2	Protein Coding	P19022	64	GC18M035096	25.3863	https://www.genecards.org/cgi-bin/carddisp.pl?gene=CDH2
GJA1	Gap Junction Protein Alpha 1	Protein Coding	P17302	63	GC06P146071	25.3708	https://www.genecards.org/cgi-bin/carddisp.pl?gene=GJA1
ARID1A	AT-Rich Interaction Domain 1A	Protein Coding	O14497	58	GC01P026693	25.2285	https://www.genecards.org/cgi-bin/carddisp.pl?gene=ARID1A
LINC01672	Long Intergenic Non-Protein Coding RNA 1672	RNA Gene		21	GC01P050860	25.2197	https://www.genecards.org/cgi-bin/carddisp.pl?gene=LINC01672
CXCR4	C-X-C Motif Chemokine Receptor 4	Protein Coding	P61073	66	GC02M136114	25.1729	https://www.genecards.org/cgi-bin/carddisp.pl?gene=CXCR4
MEG3	Maternally Expressed 3	RNA Gene		37	GC14P117888	25.1449	https://www.genecards.org/cgi-bin/carddisp.pl?gene=MEG3
SLC17A5	Solute Carrier Family 17 Member 5	Protein Coding	Q9NRA2	58	GC06M073593	25.1147	https://www.genecards.org/cgi-bin/carddisp.pl?gene=SLC17A5
HMOX1	Heme Oxygenase 1	Protein Coding	P09601	65	GC22P035380	25.1103	https://www.genecards.org/cgi-bin/carddisp.pl?gene=HMOX1
UBE3A	Ubiquitin Protein Ligase E3A	Protein Coding	Q05086	61	GC15M025333	25.0938	https://www.genecards.org/cgi-bin/carddisp.pl?gene=UBE3A
MSH6	MutS Homolog 6	Protein Coding	P52701	62	GC02P047695	24.9771	https://www.genecards.org/cgi-bin/carddisp.pl?gene=MSH6
NLRP3	NLR Family Pyrin Domain Containing 3	Protein Coding	Q96P20	61	GC01P247496	24.9499	https://www.genecards.org/cgi-bin/carddisp.pl?gene=NLRP3
BACE1	Beta-Secretase 1	Protein Coding	P56817	60	GC11M117285	24.9073	https://www.genecards.org/cgi-bin/carddisp.pl?gene=BACE1
BCYRN1	Brain Cytoplasmic RNA 1	RNA Gene		28	GC02P047253	24.8842	https://www.genecards.org/cgi-bin/carddisp.pl?gene=BCYRN1
APC2	APC Regulator Of WNT Signaling Pathway 2	Protein Coding	O95996	53	GC19P121868	24.8548	https://www.genecards.org/cgi-bin/carddisp.pl?gene=APC2
PAX6	Paired Box 6	Protein Coding	P26367	60	GC11M031784	24.816	https://www.genecards.org/cgi-bin/carddisp.pl?gene=PAX6
CYP27A1	Cytochrome P450 Family 27 Subfamily A Member 1	Protein Coding	Q02318	59	GC02P218781	24.8058	https://www.genecards.org/cgi-bin/carddisp.pl?gene=CYP27A1
RHOA	Ras Homolog Family Member A	Protein Coding	P61586	63	GC03M049359	24.8011	https://www.genecards.org/cgi-bin/carddisp.pl?gene=RHOA
NDE1	NudE Neurodevelopment Protein 1	Protein Coding	Q9NXR1	54	GC16P096135	24.7903	https://www.genecards.org/cgi-bin/carddisp.pl?gene=NDE1
FAS	Fas Cell Surface Death Receptor	Protein Coding	P25445	64	GC10P112626	24.7879	https://www.genecards.org/cgi-bin/carddisp.pl?gene=FAS
CASK	Calcium/Calmodulin Dependent Serine Protein Kinase	Protein Coding	O14936	62	GC0XM041514	24.7755	https://www.genecards.org/cgi-bin/carddisp.pl?gene=CASK
ATRX	ATRX Chromatin Remodeler	Protein Coding	P46100	59	GC0XM077504	24.7729	https://www.genecards.org/cgi-bin/carddisp.pl?gene=ATRX
LCN2	Lipocalin 2	Protein Coding	P80188	58	GC09P128149	24.7315	https://www.genecards.org/cgi-bin/carddisp.pl?gene=LCN2
ASPA	Aspartoacylase	Protein Coding	P45381	55	GC17P003472	24.6272	https://www.genecards.org/cgi-bin/carddisp.pl?gene=ASPA
MALAT1	Metastasis Associated Lung Adenocarcinoma Transcript 1	RNA Gene		33	GC11P094626	24.5362	https://www.genecards.org/cgi-bin/carddisp.pl?gene=MALAT1
ENG	Endoglin	Protein Coding	P17813	60	GC09M128107	24.5336	https://www.genecards.org/cgi-bin/carddisp.pl?gene=ENG
GABRA1	Gamma-Aminobutyric Acid Type A Receptor Subunit Alpha1	Protein Coding	P14867	60	GC05P161847	24.516	https://www.genecards.org/cgi-bin/carddisp.pl?gene=GABRA1
DMD	Dystrophin	Protein Coding	P11532	58	GC0XM031097	24.5029	https://www.genecards.org/cgi-bin/carddisp.pl?gene=DMD
DMBT1	Deleted In Malignant Brain Tumors 1	Protein Coding	Q9UGM3	52	GC10P122560	24.3905	https://www.genecards.org/cgi-bin/carddisp.pl?gene=DMBT1
ATP1A3	ATPase Na+/K+ Transporting Subunit Alpha 3	Protein Coding	P13637	61	GC19M041966	24.3454	https://www.genecards.org/cgi-bin/carddisp.pl?gene=ATP1A3
FGF2	Fibroblast Growth Factor 2	Protein Coding	P09038	59	GC04P122826	24.3176	https://www.genecards.org/cgi-bin/carddisp.pl?gene=FGF2
STXBP1	Syntaxin Binding Protein 1	Protein Coding	P61764	62	GC09P143801	24.3162	https://www.genecards.org/cgi-bin/carddisp.pl?gene=STXBP1
STAT3	Signal Transducer And Activator Of Transcription 3	Protein Coding	P40763	67	GC17M042313	24.2653	https://www.genecards.org/cgi-bin/carddisp.pl?gene=STAT3
CHAT	Choline O-Acetyltransferase	Protein Coding	P28329	62	GC10P049609	24.2387	https://www.genecards.org/cgi-bin/carddisp.pl?gene=CHAT
ARX	Aristaless Related Homeobox	Protein Coding	Q96QS3	56	GC0XM025003	24.2015	https://www.genecards.org/cgi-bin/carddisp.pl?gene=ARX
ARSA	Arylsulfatase A	Protein Coding	P15289	60	GC22M050622	24.1957	https://www.genecards.org/cgi-bin/carddisp.pl?gene=ARSA
KCNB1	Potassium Voltage-Gated Channel Subfamily B Member 1	Protein Coding	Q14721	59	GC20M049293	24.1014	https://www.genecards.org/cgi-bin/carddisp.pl?gene=KCNB1
MSH2	MutS Homolog 2	Protein Coding	P43246	60	GC02P047403	24.0607	https://www.genecards.org/cgi-bin/carddisp.pl?gene=MSH2
EML1	EMAP Like 1	Protein Coding	O00423	52	GC14P099737	23.9649	https://www.genecards.org/cgi-bin/carddisp.pl?gene=EML1
VCP	Valosin Containing Protein	Protein Coding	P55072	62	GC09M035298	23.941	https://www.genecards.org/cgi-bin/carddisp.pl?gene=VCP
APC	APC Regulator Of WNT Signaling Pathway	Protein Coding	P25054	62	GC05P112707	23.9108	https://www.genecards.org/cgi-bin/carddisp.pl?gene=APC
GCH1	GTP Cyclohydrolase 1	Protein Coding	P30793	59	GC14M054842	23.8905	https://www.genecards.org/cgi-bin/carddisp.pl?gene=GCH1
HSPD1	Heat Shock Protein Family D (Hsp60) Member 1	Protein Coding	P10809	62	GC02M197486	23.8793	https://www.genecards.org/cgi-bin/carddisp.pl?gene=HSPD1
CDKL5	Cyclin Dependent Kinase Like 5	Protein Coding	O76039	55	GC0XP018425	23.7822	https://www.genecards.org/cgi-bin/carddisp.pl?gene=CDKL5
PMS2	PMS1 Homolog 2, Mismatch Repair System Component	Protein Coding	P54278	62	GC07M005973	23.7717	https://www.genecards.org/cgi-bin/carddisp.pl?gene=PMS2
RAI1	Retinoic Acid Induced 1	Protein Coding	Q7Z5J4	52	GC17P122253	23.7344	https://www.genecards.org/cgi-bin/carddisp.pl?gene=RAI1
RNASEH2C	Ribonuclease H2 Subunit C	Protein Coding	Q8TDP1	51	GC11M065714	23.6857	https://www.genecards.org/cgi-bin/carddisp.pl?gene=RNASEH2C
SLC6A1	Solute Carrier Family 6 Member 1	Protein Coding	P30531	59	GC03P022813	23.675	https://www.genecards.org/cgi-bin/carddisp.pl?gene=SLC6A1
TREX1	Three Prime Repair Exonuclease 1	Protein Coding	Q9NSU2	55	GC03P059849	23.6741	https://www.genecards.org/cgi-bin/carddisp.pl?gene=TREX1
MYCN	MYCN Proto-Oncogene, BHLH Transcription Factor	Protein Coding	P04198	59	GC02P015970	23.6416	https://www.genecards.org/cgi-bin/carddisp.pl?gene=MYCN
PARK7	Parkinsonism Associated Deglycase	Protein Coding	Q99497	60	GC01P050925	23.6148	https://www.genecards.org/cgi-bin/carddisp.pl?gene=PARK7
SPAST	Spastin	Protein Coding	Q9UBP0	54	GC02P032063	23.5946	https://www.genecards.org/cgi-bin/carddisp.pl?gene=SPAST
SPG11	SPG11 Vesicle Trafficking Associated, Spatacsin	Protein Coding	Q96JI7	52	GC15M044946	23.5851	https://www.genecards.org/cgi-bin/carddisp.pl?gene=SPG11
MYC	MYC Proto-Oncogene, BHLH Transcription Factor	Protein Coding	P01106	66	GC08P127735	23.573	https://www.genecards.org/cgi-bin/carddisp.pl?gene=MYC
GRIA3	Glutamate Ionotropic Receptor AMPA Type Subunit 3	Protein Coding	P42263	63	GC0XP123184	23.5501	https://www.genecards.org/cgi-bin/carddisp.pl?gene=GRIA3
ATP7B	ATPase Copper Transporting Beta	Protein Coding	P35670	61	GC13M051930	23.5396	https://www.genecards.org/cgi-bin/carddisp.pl?gene=ATP7B
KCNQ2	Potassium Voltage-Gated Channel Subfamily Q Member 2	Protein Coding	O43526	60	GC20M063400	23.5383	https://www.genecards.org/cgi-bin/carddisp.pl?gene=KCNQ2
SMARCE1	SWI/SNF Related, Matrix Associated, Actin Dependent Regulator Of Chromatin, Subfamily E, Member 1	Protein Coding	Q969G3	58	GC17M040624	23.5314	https://www.genecards.org/cgi-bin/carddisp.pl?gene=SMARCE1
SYNGAP1	Synaptic Ras GTPase Activating Protein 1	Protein Coding	Q96PV0	60	GC06P144845	23.4798	https://www.genecards.org/cgi-bin/carddisp.pl?gene=SYNGAP1
ATP1A2	ATPase Na+/K+ Transporting Subunit Alpha 2	Protein Coding	P50993	61	GC01P160115	23.4677	https://www.genecards.org/cgi-bin/carddisp.pl?gene=ATP1A2
GRIN2A	Glutamate Ionotropic Receptor NMDA Type Subunit 2A	Protein Coding	Q12879	64	GC16M009753	23.4653	https://www.genecards.org/cgi-bin/carddisp.pl?gene=GRIN2A
DHCR7	7-Dehydrocholesterol Reductase	Protein Coding	Q9UBM7	60	GC11M071428	23.4325	https://www.genecards.org/cgi-bin/carddisp.pl?gene=DHCR7
CST3	Cystatin C	Protein Coding	P01034	56	GC20M023970	23.428	https://www.genecards.org/cgi-bin/carddisp.pl?gene=CST3
SLC16A2	Solute Carrier Family 16 Member 2	Protein Coding	P36021	56	GC0XP074910	23.4158	https://www.genecards.org/cgi-bin/carddisp.pl?gene=SLC16A2
CNTN2	Contactin 2	Protein Coding	Q02246	58	GC01P205043	23.4153	https://www.genecards.org/cgi-bin/carddisp.pl?gene=CNTN2
NPC1	NPC Intracellular Cholesterol Transporter 1	Protein Coding	O15118	62	GC18M023506	23.3916	https://www.genecards.org/cgi-bin/carddisp.pl?gene=NPC1
OTX2	Orthodenticle Homeobox 2	Protein Coding	P32243	59	GC14M056799	23.3648	https://www.genecards.org/cgi-bin/carddisp.pl?gene=OTX2
CHD7	Chromodomain Helicase DNA Binding Protein 7	Protein Coding	Q9P2D1	57	GC08P060678	23.3002	https://www.genecards.org/cgi-bin/carddisp.pl?gene=CHD7
MLC1	Modulator Of VRAC Current 1	Protein Coding	Q15049	55	GC22M050059	23.2184	https://www.genecards.org/cgi-bin/carddisp.pl?gene=MLC1
ABCD1	ATP Binding Cassette Subfamily D Member 1	Protein Coding	P33897	59	GC0XP153724	23.2101	https://www.genecards.org/cgi-bin/carddisp.pl?gene=ABCD1
NOTCH1	Notch Receptor 1	Protein Coding	P46531	66	GC09M138850	23.2075	https://www.genecards.org/cgi-bin/carddisp.pl?gene=NOTCH1
TYROBP	Transmembrane Immune Signaling Adaptor TYROBP	Protein Coding	O43914	56	GC19M035904	23.1922	https://www.genecards.org/cgi-bin/carddisp.pl?gene=TYROBP
IL4	Interleukin 4	Protein Coding	P05112	59	GC05P132673	23.133	https://www.genecards.org/cgi-bin/carddisp.pl?gene=IL4
ANK3	Ankyrin 3	Protein Coding	Q12955	55	GC10M060026	23.12	https://www.genecards.org/cgi-bin/carddisp.pl?gene=ANK3
RB1	RB Transcriptional Corepressor 1	Protein Coding	P06400	62	GC13P048303	23.1155	https://www.genecards.org/cgi-bin/carddisp.pl?gene=RB1
IL1A	Interleukin 1 Alpha	Protein Coding	P01583	58	GC02M112773	23.0987	https://www.genecards.org/cgi-bin/carddisp.pl?gene=IL1A
HSPB1	Heat Shock Protein Family B (Small) Member 1	Protein Coding	P04792	64	GC07P076302	23.0624	https://www.genecards.org/cgi-bin/carddisp.pl?gene=HSPB1
WFS1	Wolframin ER Transmembrane Glycoprotein	Protein Coding	O76024	58	GC04P006269	23.0259	https://www.genecards.org/cgi-bin/carddisp.pl?gene=WFS1
KIF1A	Kinesin Family Member 1A	Protein Coding	Q12756	56	GC02M240713	23.0223	https://www.genecards.org/cgi-bin/carddisp.pl?gene=KIF1A
KMT2D	Lysine Methyltransferase 2D	Protein Coding	O14686	56	GC12M049018	23.0211	https://www.genecards.org/cgi-bin/carddisp.pl?gene=KMT2D
PAH	Phenylalanine Hydroxylase	Protein Coding	P00439	60	GC12M102836	22.9493	https://www.genecards.org/cgi-bin/carddisp.pl?gene=PAH
FLNA	Filamin A	Protein Coding	P21333	61	GC0XM154348	22.923	https://www.genecards.org/cgi-bin/carddisp.pl?gene=FLNA
SCN1B	Sodium Voltage-Gated Channel Beta Subunit 1	Protein Coding	Q07699	58	GC19P035030	22.8964	https://www.genecards.org/cgi-bin/carddisp.pl?gene=SCN1B
MIR21	MicroRNA 21	RNA Gene		33	GC17P123488	22.882	https://www.genecards.org/cgi-bin/carddisp.pl?gene=MIR21
SCN8A	Sodium Voltage-Gated Channel Alpha Subunit 8	Protein Coding	Q9UQD0	62	GC12P051590	22.8639	https://www.genecards.org/cgi-bin/carddisp.pl?gene=SCN8A
MEF2C	Myocyte Enhancer Factor 2C	Protein Coding	Q06413	62	GC05M088718	22.7995	https://www.genecards.org/cgi-bin/carddisp.pl?gene=MEF2C
TERT	Telomerase Reverse Transcriptase	Protein Coding	O14746	64	GC05M001253	22.7968	https://www.genecards.org/cgi-bin/carddisp.pl?gene=TERT
MLH1	MutL Homolog 1	Protein Coding	P40692	62	GC03P036993	22.7835	https://www.genecards.org/cgi-bin/carddisp.pl?gene=MLH1
DRD2	Dopamine Receptor D2	Protein Coding	P14416	63	GC11M113409	22.7795	https://www.genecards.org/cgi-bin/carddisp.pl?gene=DRD2
PRRT2	Proline Rich Transmembrane Protein 2	Protein Coding	Q7Z6L0	52	GC16P029811	22.7106	https://www.genecards.org/cgi-bin/carddisp.pl?gene=PRRT2
PCDH19	Protocadherin 19	Protein Coding	Q8TAB3	56	GC0XM100291	22.7018	https://www.genecards.org/cgi-bin/carddisp.pl?gene=PCDH19
SLC12A5	Solute Carrier Family 12 Member 5	Protein Coding	Q9H2X9	61	GC20P046021	22.6429	https://www.genecards.org/cgi-bin/carddisp.pl?gene=SLC12A5
ARG1	Arginase 1	Protein Coding	P05089	62	GC06P146254	22.6249	https://www.genecards.org/cgi-bin/carddisp.pl?gene=ARG1
MED17	Mediator Complex Subunit 17	Protein Coding	Q9NVC6	52	GC11P093784	22.5212	https://www.genecards.org/cgi-bin/carddisp.pl?gene=MED17
HLA-DRB1	Major Histocompatibility Complex, Class II, DR Beta 1	Protein Coding	P01911	59	GC06M097159	22.4537	https://www.genecards.org/cgi-bin/carddisp.pl?gene=HLA-DRB1
ADAR	Adenosine Deaminase RNA Specific	Protein Coding	P55265	59	GC01M163944	22.4519	https://www.genecards.org/cgi-bin/carddisp.pl?gene=ADAR
F5	Coagulation Factor V	Protein Coding	P12259	59	GC01M169511	22.4329	https://www.genecards.org/cgi-bin/carddisp.pl?gene=F5
DEPDC5	DEP Domain Containing 5, GATOR1 Subcomplex Subunit	Protein Coding	O75140	54	GC22P031753	22.4096	https://www.genecards.org/cgi-bin/carddisp.pl?gene=DEPDC5
GABRG2	Gamma-Aminobutyric Acid Type A Receptor Subunit Gamma2	Protein Coding	P18507	60	GC05P162000	22.3757	https://www.genecards.org/cgi-bin/carddisp.pl?gene=GABRG2
NAGLU	N-Acetyl-Alpha-Glucosaminidase	Protein Coding	P54802	56	GC17P123062	22.3641	https://www.genecards.org/cgi-bin/carddisp.pl?gene=NAGLU
IGF1R	Insulin Like Growth Factor 1 Receptor	Protein Coding	P08069	68	GC15P098648	22.3448	https://www.genecards.org/cgi-bin/carddisp.pl?gene=IGF1R
DARS1	Aspartyl-TRNA Synthetase 1	Protein Coding	P14868	56	GC02M135905	22.3303	https://www.genecards.org/cgi-bin/carddisp.pl?gene=DARS1
HTT	Huntingtin	Protein Coding	P42858	56	GC04P003041	22.3263	https://www.genecards.org/cgi-bin/carddisp.pl?gene=HTT
PTPN23	Protein Tyrosine Phosphatase Non-Receptor Type 23	Protein Coding	Q9H3S7	52	GC03P059775	22.32	https://www.genecards.org/cgi-bin/carddisp.pl?gene=PTPN23
MAG	Myelin Associated Glycoprotein	Protein Coding	P20916	60	GC19P035292	22.2918	https://www.genecards.org/cgi-bin/carddisp.pl?gene=MAG
CHRNA7	Cholinergic Receptor Nicotinic Alpha 7 Subunit	Protein Coding	P36544	56	GC15P031923	22.2617	https://www.genecards.org/cgi-bin/carddisp.pl?gene=CHRNA7
PPT1	Palmitoyl-Protein Thioesterase 1	Protein Coding	P50897	59	GC01M040213	22.2481	https://www.genecards.org/cgi-bin/carddisp.pl?gene=PPT1
CTNNA2	Catenin Alpha 2	Protein Coding	P26232	55	GC02P079185	22.2431	https://www.genecards.org/cgi-bin/carddisp.pl?gene=CTNNA2
TOR1A	Torsin Family 1 Member A	Protein Coding	O14656	59	GC09M129812	22.2257	https://www.genecards.org/cgi-bin/carddisp.pl?gene=TOR1A
CRH	Corticotropin Releasing Hormone	Protein Coding	P06850	56	GC08M066176	22.2227	https://www.genecards.org/cgi-bin/carddisp.pl?gene=CRH
MED12	Mediator Complex Subunit 12	Protein Coding	Q93074	57	GC0XP071118	22.2134	https://www.genecards.org/cgi-bin/carddisp.pl?gene=MED12
HLA-B	Major Histocompatibility Complex, Class I, B	Protein Coding	P01889	59	GC06M097059	22.2102	https://www.genecards.org/cgi-bin/carddisp.pl?gene=HLA-B
MAPK3	Mitogen-Activated Protein Kinase 3	Protein Coding	P27361	63	GC16M044882	22.2081	https://www.genecards.org/cgi-bin/carddisp.pl?gene=MAPK3
AARS2	Alanyl-TRNA Synthetase 2, Mitochondrial	Protein Coding	Q5JTZ9	56	GC06M097391	22.1455	https://www.genecards.org/cgi-bin/carddisp.pl?gene=AARS2
CDKN2A	Cyclin Dependent Kinase Inhibitor 2A	Protein Coding	Q8N726	64	GC09M021967	22.1365	https://www.genecards.org/cgi-bin/carddisp.pl?gene=CDKN2A
ARFGEF2	ADP Ribosylation Factor Guanine Nucleotide Exchange Factor 2	Protein Coding	Q9Y6D5	53	GC20P048921	22.1183	https://www.genecards.org/cgi-bin/carddisp.pl?gene=ARFGEF2
CNP	2',3'-Cyclic Nucleotide 3' Phosphodiesterase	Protein Coding	P09543	56	GC17P041966	22.091	https://www.genecards.org/cgi-bin/carddisp.pl?gene=CNP
MAP1B	Microtubule Associated Protein 1B	Protein Coding	P46821	58	GC05P072107	22.0903	https://www.genecards.org/cgi-bin/carddisp.pl?gene=MAP1B
CLDN5	Claudin 5	Protein Coding	O00501	54	GC22M019523	22.0895	https://www.genecards.org/cgi-bin/carddisp.pl?gene=CLDN5
DNAJC6	DnaJ Heat Shock Protein Family (Hsp40) Member C6	Protein Coding	O75061	56	GC01P065248	22.0794	https://www.genecards.org/cgi-bin/carddisp.pl?gene=DNAJC6
SOX3	SRY-Box Transcription Factor 3	Protein Coding	P41225	55	GC0XM140502	22.0785	https://www.genecards.org/cgi-bin/carddisp.pl?gene=SOX3
IL18	Interleukin 18	Protein Coding	Q14116	57	GC11M112143	22.0782	https://www.genecards.org/cgi-bin/carddisp.pl?gene=IL18
DDC	Dopa Decarboxylase	Protein Coding	P20711	63	GC07M050458	22.0758	https://www.genecards.org/cgi-bin/carddisp.pl?gene=DDC
SLC20A2	Solute Carrier Family 20 Member 2	Protein Coding	Q08357	59	GC08M042416	22.0523	https://www.genecards.org/cgi-bin/carddisp.pl?gene=SLC20A2
SNAP25	Synaptosome Associated Protein 25	Protein Coding	P60880	62	GC20P010226	22.0338	https://www.genecards.org/cgi-bin/carddisp.pl?gene=SNAP25
SORL1	Sortilin Related Receptor 1	Protein Coding	Q92673	58	GC11P121452	22.0321	https://www.genecards.org/cgi-bin/carddisp.pl?gene=SORL1
SERPINE1	Serpin Family E Member 1	Protein Coding	P05121	64	GC07P101127	22.0107	https://www.genecards.org/cgi-bin/carddisp.pl?gene=SERPINE1
GAMT	Guanidinoacetate N-Methyltransferase	Protein Coding	Q14353	59	GC19M001397	21.9972	https://www.genecards.org/cgi-bin/carddisp.pl?gene=GAMT
HTRA1	HtrA Serine Peptidase 1	Protein Coding	Q92743	58	GC10P122461	21.9829	https://www.genecards.org/cgi-bin/carddisp.pl?gene=HTRA1
SCN3A	Sodium Voltage-Gated Channel Alpha Subunit 3	Protein Coding	Q9NY46	60	GC02M165087	21.9809	https://www.genecards.org/cgi-bin/carddisp.pl?gene=SCN3A
AIFM1	Apoptosis Inducing Factor Mitochondria Associated 1	Protein Coding	O95831	62	GC0XM130129	21.9732	https://www.genecards.org/cgi-bin/carddisp.pl?gene=AIFM1
PTGS2	Prostaglandin-Endoperoxide Synthase 2	Protein Coding	P35354	62	GC01M186671	21.9389	https://www.genecards.org/cgi-bin/carddisp.pl?gene=PTGS2
SCN9A	Sodium Voltage-Gated Channel Alpha Subunit 9	Protein Coding	Q15858	60	GC02M166195	21.9343	https://www.genecards.org/cgi-bin/carddisp.pl?gene=SCN9A
PIK3CG	Phosphatidylinositol-4,5-Bisphosphate 3-Kinase Catalytic Subunit Gamma	Protein Coding	P48736	62	GC07P106865	21.9203	https://www.genecards.org/cgi-bin/carddisp.pl?gene=PIK3CG
EPCAM	Epithelial Cell Adhesion Molecule	Protein Coding	P16422	61	GC02P047345	21.895	https://www.genecards.org/cgi-bin/carddisp.pl?gene=EPCAM
GPT	Glutamic--Pyruvic Transaminase	Protein Coding	P24298	55	GC08P144502	21.8625	https://www.genecards.org/cgi-bin/carddisp.pl?gene=GPT
LINC02605	Long Intergenic Non-Protein Coding RNA 2605	RNA Gene		22	GC08P078838	21.8305	https://www.genecards.org/cgi-bin/carddisp.pl?gene=LINC02605
VPS13A	Vacuolar Protein Sorting 13 Homolog A	Protein Coding	Q96RL7	54	GC09P077177	21.8054	https://www.genecards.org/cgi-bin/carddisp.pl?gene=VPS13A
CACNA1C	Calcium Voltage-Gated Channel Subunit Alpha1 C	Protein Coding	Q13936	62	GC12P001970	21.7845	https://www.genecards.org/cgi-bin/carddisp.pl?gene=CACNA1C
NIPBL	NIPBL Cohesin Loading Factor	Protein Coding	Q6KC79	55	GC05P036876	21.7803	https://www.genecards.org/cgi-bin/carddisp.pl?gene=NIPBL
PRF1	Perforin 1	Protein Coding	P14222	59	GC10M070597	21.7704	https://www.genecards.org/cgi-bin/carddisp.pl?gene=PRF1
FUS	FUS RNA Binding Protein	Protein Coding	P35637	58	GC16P031180	21.7589	https://www.genecards.org/cgi-bin/carddisp.pl?gene=FUS
ASXL1	ASXL Transcriptional Regulator 1	Protein Coding	Q8IXJ9	56	GC20P042191	21.7391	https://www.genecards.org/cgi-bin/carddisp.pl?gene=ASXL1
MCPH1	Microcephalin 1	Protein Coding	Q8NEM0	52	GC08P006406	21.7123	https://www.genecards.org/cgi-bin/carddisp.pl?gene=MCPH1
TJP1	Tight Junction Protein 1	Protein Coding	Q07157	58	GC15M029699	21.6771	https://www.genecards.org/cgi-bin/carddisp.pl?gene=TJP1
ALDH7A1	Aldehyde Dehydrogenase 7 Family Member A1	Protein Coding	P49419	60	GC05M126541	21.6716	https://www.genecards.org/cgi-bin/carddisp.pl?gene=ALDH7A1
NF2	NF2, Moesin-Ezrin-Radixin Like (MERLIN) Tumor Suppressor	Protein Coding	P35240	62	GC22P029603	21.6713	https://www.genecards.org/cgi-bin/carddisp.pl?gene=NF2
FOXP2	Forkhead Box P2	Protein Coding	O15409	56	GC07P114086	21.6568	https://www.genecards.org/cgi-bin/carddisp.pl?gene=FOXP2
CDC42	Cell Division Cycle 42	Protein Coding	P60953	63	GC01P022052	21.6256	https://www.genecards.org/cgi-bin/carddisp.pl?gene=CDC42
TMX2-CTNND1	TMX2-CTNND1 Readthrough (NMD Candidate)	RNA Gene		25	GC11P057712	21.6242	https://www.genecards.org/cgi-bin/carddisp.pl?gene=TMX2-CTNND1
SLC1A1	Solute Carrier Family 1 Member 1	Protein Coding	P43005	62	GC09P004490	21.6096	https://www.genecards.org/cgi-bin/carddisp.pl?gene=SLC1A1
CNTNAP2	Contactin Associated Protein 2	Protein Coding	Q9UHC6	58	GC07P146116	21.585	https://www.genecards.org/cgi-bin/carddisp.pl?gene=CNTNAP2
CPT2	Carnitine Palmitoyltransferase 2	Protein Coding	P23786	63	GC01P053196	21.5655	https://www.genecards.org/cgi-bin/carddisp.pl?gene=CPT2
NPPA	Natriuretic Peptide A	Protein Coding	P01160	58	GC01M015387	21.5049	https://www.genecards.org/cgi-bin/carddisp.pl?gene=NPPA
SMPD1	Sphingomyelin Phosphodiesterase 1	Protein Coding	P17405	62	GC11P006390	21.5018	https://www.genecards.org/cgi-bin/carddisp.pl?gene=SMPD1
SLC6A8	Solute Carrier Family 6 Member 8	Protein Coding	P48029	59	GC0XP153704	21.4885	https://www.genecards.org/cgi-bin/carddisp.pl?gene=SLC6A8
HGF	Hepatocyte Growth Factor	Protein Coding	P14210	65	GC07M081699	21.4832	https://www.genecards.org/cgi-bin/carddisp.pl?gene=HGF
HEPACAM	Hepatic And Glial Cell Adhesion Molecule	Protein Coding	Q14CZ8	52	GC11M124919	21.4578	https://www.genecards.org/cgi-bin/carddisp.pl?gene=HEPACAM
WDR62	WD Repeat Domain 62	Protein Coding	O43379	51	GC19P036054	21.4457	https://www.genecards.org/cgi-bin/carddisp.pl?gene=WDR62
NFIX	Nuclear Factor I X	Protein Coding	Q14938	56	GC19P122449	21.443	https://www.genecards.org/cgi-bin/carddisp.pl?gene=NFIX
CTSD	Cathepsin D	Protein Coding	P07339	66	GC11M001752	21.4382	https://www.genecards.org/cgi-bin/carddisp.pl?gene=CTSD
VHL	Von Hippel-Lindau Tumor Suppressor	Protein Coding	P40337	60	GC03P022792	21.4189	https://www.genecards.org/cgi-bin/carddisp.pl?gene=VHL
PNKP	Polynucleotide Kinase 3'-Phosphatase	Protein Coding	Q96T60	59	GC19M097202	21.4182	https://www.genecards.org/cgi-bin/carddisp.pl?gene=PNKP
ADAT3	Adenosine Deaminase TRNA Specific 3	Protein Coding	Q96EY9	47	GC19P121889	21.3997	https://www.genecards.org/cgi-bin/carddisp.pl?gene=ADAT3
SERPINI1	Serpin Family I Member 1	Protein Coding	Q99574	59	GC03P167735	21.3752	https://www.genecards.org/cgi-bin/carddisp.pl?gene=SERPINI1
KCNJ10	Potassium Inwardly Rectifying Channel Subfamily J Member 10	Protein Coding	P78508	59	GC01M159998	21.3665	https://www.genecards.org/cgi-bin/carddisp.pl?gene=KCNJ10
PRUNE1	Prune Exopolyphosphatase 1	Protein Coding	Q86TP1	52	GC01P151008	21.3652	https://www.genecards.org/cgi-bin/carddisp.pl?gene=PRUNE1
MIR142	MicroRNA 142	RNA Gene		31	GC17M058331	21.3649	https://www.genecards.org/cgi-bin/carddisp.pl?gene=MIR142
EPO	Erythropoietin	Protein Coding	P01588	55	GC07P100720	21.3433	https://www.genecards.org/cgi-bin/carddisp.pl?gene=EPO
DYRK1A	Dual Specificity Tyrosine Phosphorylation Regulated Kinase 1A	Protein Coding	Q13627	63	GC21P037365	21.3413	https://www.genecards.org/cgi-bin/carddisp.pl?gene=DYRK1A
GLA	Galactosidase Alpha	Protein Coding	P06280	63	GC0XM101393	21.287	https://www.genecards.org/cgi-bin/carddisp.pl?gene=GLA
PLCB1	Phospholipase C Beta 1	Protein Coding	Q9NQ66	60	GC20P008077	21.2849	https://www.genecards.org/cgi-bin/carddisp.pl?gene=PLCB1
IQSEC2	IQ Motif And Sec7 Domain ArfGEF 2	Protein Coding	Q5JU85	52	GC0XM053225	21.2836	https://www.genecards.org/cgi-bin/carddisp.pl?gene=IQSEC2
NPC2	NPC Intracellular Cholesterol Transporter 2	Protein Coding	P61916	56	GC14M074476	21.277	https://www.genecards.org/cgi-bin/carddisp.pl?gene=NPC2
POMC	Proopiomelanocortin	Protein Coding	P01189	61	GC02M025160	21.2737	https://www.genecards.org/cgi-bin/carddisp.pl?gene=POMC
DICER1	Dicer 1, Ribonuclease III	Protein Coding	Q9UPY3	61	GC14M095086	21.2638	https://www.genecards.org/cgi-bin/carddisp.pl?gene=DICER1
NFE2L2	NFE2 Like BZIP Transcription Factor 2	Protein Coding	Q16236	64	GC02M177227	21.2336	https://www.genecards.org/cgi-bin/carddisp.pl?gene=NFE2L2
TBC1D24	TBC1 Domain Family Member 24	Protein Coding	Q9ULP9	51	GC16P002475	21.2287	https://www.genecards.org/cgi-bin/carddisp.pl?gene=TBC1D24
CCND1	Cyclin D1	Protein Coding	P24385	66	GC11P069641	21.2076	https://www.genecards.org/cgi-bin/carddisp.pl?gene=CCND1
EP300	E1A Binding Protein P300	Protein Coding	Q09472	65	GC22P076143	21.1904	https://www.genecards.org/cgi-bin/carddisp.pl?gene=EP300
CRPPA-AS1	CRPPA Antisense RNA 1	RNA Gene		23	GC07P016177	21.1751	https://www.genecards.org/cgi-bin/carddisp.pl?gene=CRPPA-AS1
SHANK3	SH3 And Multiple Ankyrin Repeat Domains 3	Protein Coding	Q9BYB0	52	GC22P076396	21.1525	https://www.genecards.org/cgi-bin/carddisp.pl?gene=SHANK3
FABP7	Fatty Acid Binding Protein 7	Protein Coding	O15540	54	GC06P146097	21.1381	https://www.genecards.org/cgi-bin/carddisp.pl?gene=FABP7
GPT2	Glutamic--Pyruvic Transaminase 2	Protein Coding	Q8TD30	58	GC16P097033	21.1234	https://www.genecards.org/cgi-bin/carddisp.pl?gene=GPT2
MET	MET Proto-Oncogene, Receptor Tyrosine Kinase	Protein Coding	P08581	67	GC07P116672	21.1156	https://www.genecards.org/cgi-bin/carddisp.pl?gene=MET
HIF1A	Hypoxia Inducible Factor 1 Subunit Alpha	Protein Coding	Q16665	62	GC14P061695	21.1135	https://www.genecards.org/cgi-bin/carddisp.pl?gene=HIF1A
BRCA2	BRCA2 DNA Repair Associated	Protein Coding	P51587	60	GC13P032315	21.1131	https://www.genecards.org/cgi-bin/carddisp.pl?gene=BRCA2
DNMT3A	DNA Methyltransferase 3 Alpha	Protein Coding	Q9Y6K1	64	GC02M025228	21.0975	https://www.genecards.org/cgi-bin/carddisp.pl?gene=DNMT3A
ACHE	Acetylcholinesterase (Yt Blood Group)	Protein Coding	P22303	60	GC07M100889	21.0711	https://www.genecards.org/cgi-bin/carddisp.pl?gene=ACHE
PPARG	Peroxisome Proliferator Activated Receptor Gamma	Protein Coding	P37231	66	GC03P012287	21.0481	https://www.genecards.org/cgi-bin/carddisp.pl?gene=PPARG
CTLA4	Cytotoxic T-Lymphocyte Associated Protein 4	Protein Coding	P16410	61	GC02P204076	21.0391	https://www.genecards.org/cgi-bin/carddisp.pl?gene=CTLA4
FGFR3	Fibroblast Growth Factor Receptor 3	Protein Coding	P22607	68	GC04P004728	21.0204	https://www.genecards.org/cgi-bin/carddisp.pl?gene=FGFR3
HTR2A	5-Hydroxytryptamine Receptor 2A	Protein Coding	P28223	60	GC13M046831	20.9588	https://www.genecards.org/cgi-bin/carddisp.pl?gene=HTR2A
L1CAM	L1 Cell Adhesion Molecule	Protein Coding	P32004	60	GC0XM153864	20.9513	https://www.genecards.org/cgi-bin/carddisp.pl?gene=L1CAM
HLA-DQB1	Major Histocompatibility Complex, Class II, DQ Beta 1	Protein Coding	P01920	55	GC06M097169	20.9405	https://www.genecards.org/cgi-bin/carddisp.pl?gene=HLA-DQB1
POLR1C	RNA Polymerase I And III Subunit C	Protein Coding	O15160	58	GC06P144971	20.9399	https://www.genecards.org/cgi-bin/carddisp.pl?gene=POLR1C
KCNA1	Potassium Voltage-Gated Channel Subfamily A Member 1	Protein Coding	Q09470	58	GC12P042065	20.9376	https://www.genecards.org/cgi-bin/carddisp.pl?gene=KCNA1
INSR	Insulin Receptor	Protein Coding	P06213	67	GC19M007112	20.9305	https://www.genecards.org/cgi-bin/carddisp.pl?gene=INSR
NACC1	Nucleus Accumbens Associated 1	Protein Coding	Q96RE7	52	GC19P122459	20.9228	https://www.genecards.org/cgi-bin/carddisp.pl?gene=NACC1
SDHA	Succinate Dehydrogenase Complex Flavoprotein Subunit A	Protein Coding	P31040	60	GC05P000232	20.9148	https://www.genecards.org/cgi-bin/carddisp.pl?gene=SDHA
MIR34A	MicroRNA 34a	RNA Gene		32	GC01M015281	20.9044	https://www.genecards.org/cgi-bin/carddisp.pl?gene=MIR34A
PLAA	Phospholipase A2 Activating Protein	Protein Coding	Q9Y263	56	GC09M026903	20.8834	https://www.genecards.org/cgi-bin/carddisp.pl?gene=PLAA
SRPX2	Sushi Repeat Containing Protein X-Linked 2	Protein Coding	O60687	53	GC0XP100648	20.8548	https://www.genecards.org/cgi-bin/carddisp.pl?gene=SRPX2
HPRT1	Hypoxanthine Phosphoribosyltransferase 1	Protein Coding	P00492	61	GC0XP134460	20.8488	https://www.genecards.org/cgi-bin/carddisp.pl?gene=HPRT1
TUBB4A	Tubulin Beta 4A Class IVa	Protein Coding	P04350	60	GC19M095996	20.8309	https://www.genecards.org/cgi-bin/carddisp.pl?gene=TUBB4A
EZH2	Enhancer Of Zeste 2 Polycomb Repressive Complex 2 Subunit	Protein Coding	Q15910	66	GC07M148807	20.8297	https://www.genecards.org/cgi-bin/carddisp.pl?gene=EZH2
CREBBP	CREB Binding Protein	Protein Coding	Q92793	67	GC16M025750	20.815	https://www.genecards.org/cgi-bin/carddisp.pl?gene=CREBBP
KRIT1	KRIT1 Ankyrin Repeat Containing	Protein Coding	O00522	54	GC07M092198	20.7848	https://www.genecards.org/cgi-bin/carddisp.pl?gene=KRIT1
GRM1	Glutamate Metabotropic Receptor 1	Protein Coding	Q13255	63	GC06P148246	20.7447	https://www.genecards.org/cgi-bin/carddisp.pl?gene=GRM1
LRP2	LDL Receptor Related Protein 2	Protein Coding	P98164	62	GC02M169127	20.7397	https://www.genecards.org/cgi-bin/carddisp.pl?gene=LRP2
GLDC	Glycine Decarboxylase	Protein Coding	P23378	60	GC09M006522	20.7307	https://www.genecards.org/cgi-bin/carddisp.pl?gene=GLDC
TUG1	Taurine Up-Regulated 1	Protein Coding	A0A6I8PU40	34	GC22P030969	20.6902	https://www.genecards.org/cgi-bin/carddisp.pl?gene=TUG1
LMNB1	Lamin B1	Protein Coding	P20700	59	GC05P126776	20.6528	https://www.genecards.org/cgi-bin/carddisp.pl?gene=LMNB1
MEFV	MEFV Innate Immunity Regulator, Pyrin	Protein Coding	O15553	56	GC16M025719	20.6343	https://www.genecards.org/cgi-bin/carddisp.pl?gene=MEFV
MAP2K1	Mitogen-Activated Protein Kinase Kinase 1	Protein Coding	Q02750	67	GC15P066386	20.6287	https://www.genecards.org/cgi-bin/carddisp.pl?gene=MAP2K1
CTC1	CST Telomere Replication Complex Component 1	Protein Coding	Q2NKJ3	49	GC17M084200	20.6272	https://www.genecards.org/cgi-bin/carddisp.pl?gene=CTC1
CDK5RAP2	CDK5 Regulatory Subunit Associated Protein 2	Protein Coding	Q96SN8	52	GC09M120388	20.6116	https://www.genecards.org/cgi-bin/carddisp.pl?gene=CDK5RAP2
SETD2	SET Domain Containing 2, Histone Lysine Methyltransferase	Protein Coding	Q9BYW2	60	GC03M047033	20.6113	https://www.genecards.org/cgi-bin/carddisp.pl?gene=SETD2
GLUD1	Glutamate Dehydrogenase 1	Protein Coding	P00367	63	GC10M087050	20.6059	https://www.genecards.org/cgi-bin/carddisp.pl?gene=GLUD1
COL18A1	Collagen Type XVIII Alpha 1 Chain	Protein Coding	P39060	59	GC21P045405	20.6017	https://www.genecards.org/cgi-bin/carddisp.pl?gene=COL18A1
ERBB4	Erb-B2 Receptor Tyrosine Kinase 4	Protein Coding	Q15303	67	GC02M211375	20.5916	https://www.genecards.org/cgi-bin/carddisp.pl?gene=ERBB4
ESR1	Estrogen Receptor 1	Protein Coding	P03372	67	GC06P151656	20.578	https://www.genecards.org/cgi-bin/carddisp.pl?gene=ESR1
UBTF	Upstream Binding Transcription Factor	Protein Coding	P17480	56	GC17M044205	20.5691	https://www.genecards.org/cgi-bin/carddisp.pl?gene=UBTF
PINK1	PTEN Induced Kinase 1	Protein Coding	Q9BXM7	59	GC01P051861	20.5642	https://www.genecards.org/cgi-bin/carddisp.pl?gene=PINK1
TUBGCP2	Tubulin Gamma Complex Component 2	Protein Coding	Q9BSJ2	52	GC10M133278	20.5641	https://www.genecards.org/cgi-bin/carddisp.pl?gene=TUBGCP2
ASPM	Assembly Factor For Spindle Microtubules	Protein Coding	Q8IZT6	50	GC01M197084	20.558	https://www.genecards.org/cgi-bin/carddisp.pl?gene=ASPM
XPR1	Xenotropic And Polytropic Retrovirus Receptor 1	Protein Coding	Q9UBH6	55	GC01P180632	20.556	https://www.genecards.org/cgi-bin/carddisp.pl?gene=XPR1
PHOX2B	Paired Like Homeobox 2B	Protein Coding	Q99453	57	GC04M041746	20.5533	https://www.genecards.org/cgi-bin/carddisp.pl?gene=PHOX2B
CXCL10	C-X-C Motif Chemokine Ligand 10	Protein Coding	P02778	57	GC04M076021	20.5346	https://www.genecards.org/cgi-bin/carddisp.pl?gene=CXCL10
PRKAR1A	Protein Kinase CAMP-Dependent Type I Regulatory Subunit Alpha	Protein Coding	P10644	64	GC17P123720	20.5286	https://www.genecards.org/cgi-bin/carddisp.pl?gene=PRKAR1A
ALDH5A1	Aldehyde Dehydrogenase 5 Family Member A1	Protein Coding	P51649	59	GC06P024494	20.4533	https://www.genecards.org/cgi-bin/carddisp.pl?gene=ALDH5A1
HDAC4	Histone Deacetylase 4	Protein Coding	P56524	65	GC02M239048	20.4509	https://www.genecards.org/cgi-bin/carddisp.pl?gene=HDAC4
MAP2	Microtubule Associated Protein 2	Protein Coding	P11137	58	GC02P209424	20.4336	https://www.genecards.org/cgi-bin/carddisp.pl?gene=MAP2
OTC	Ornithine Transcarbamylase	Protein Coding	P00480	59	GC0XP038340	20.4308	https://www.genecards.org/cgi-bin/carddisp.pl?gene=OTC
SDHD	Succinate Dehydrogenase Complex Subunit D	Protein Coding	O14521	57	GC11P112613	20.4276	https://www.genecards.org/cgi-bin/carddisp.pl?gene=SDHD
PMM2	Phosphomannomutase 2	Protein Coding	O15305	59	GC16P008788	20.4052	https://www.genecards.org/cgi-bin/carddisp.pl?gene=PMM2
SCARB2	Scavenger Receptor Class B Member 2	Protein Coding	Q14108	58	GC04M076158	20.3828	https://www.genecards.org/cgi-bin/carddisp.pl?gene=SCARB2
IFIH1	Interferon Induced With Helicase C Domain 1	Protein Coding	Q9BYX4	61	GC02M162267	20.3664	https://www.genecards.org/cgi-bin/carddisp.pl?gene=IFIH1
SLC25A22	Solute Carrier Family 25 Member 22	Protein Coding	Q9H936	54	GC11M012517	20.3336	https://www.genecards.org/cgi-bin/carddisp.pl?gene=SLC25A22
APOA1	Apolipoprotein A1	Protein Coding	P02647	63	GC11M116835	20.3315	https://www.genecards.org/cgi-bin/carddisp.pl?gene=APOA1
LGI1	Leucine Rich Glioma Inactivated 1	Protein Coding	O95970	58	GC10P093757	20.3186	https://www.genecards.org/cgi-bin/carddisp.pl?gene=LGI1
BASP1	Brain Abundant Membrane Attached Signal Protein 1	Protein Coding	P80723	43	GC05P017065	20.3027	https://www.genecards.org/cgi-bin/carddisp.pl?gene=BASP1
GNAQ	G Protein Subunit Alpha Q	Protein Coding	P50148	62	GC09M077716	20.2912	https://www.genecards.org/cgi-bin/carddisp.pl?gene=GNAQ
SMG9	SMG9 Nonsense Mediated MRNA Decay Factor	Protein Coding	Q9H0W8	48	GC19M043727	20.2897	https://www.genecards.org/cgi-bin/carddisp.pl?gene=SMG9
HSPG2	Heparan Sulfate Proteoglycan 2	Protein Coding	P98160	60	GC01M021822	20.268	https://www.genecards.org/cgi-bin/carddisp.pl?gene=HSPG2
KCNA2	Potassium Voltage-Gated Channel Subfamily A Member 2	Protein Coding	P16389	58	GC01M110519	20.2309	https://www.genecards.org/cgi-bin/carddisp.pl?gene=KCNA2
SMAD4	SMAD Family Member 4	Protein Coding	Q13485	66	GC18P051028	20.2285	https://www.genecards.org/cgi-bin/carddisp.pl?gene=SMAD4
CD46	CD46 Molecule	Protein Coding	P15529	60	GC01P207752	20.2239	https://www.genecards.org/cgi-bin/carddisp.pl?gene=CD46
CREB1	CAMP Responsive Element Binding Protein 1	Protein Coding	P16220	63	GC02P207529	20.2215	https://www.genecards.org/cgi-bin/carddisp.pl?gene=CREB1
AGTR2	Angiotensin II Receptor Type 2	Protein Coding	P50052	57	GC0XP116170	20.2133	https://www.genecards.org/cgi-bin/carddisp.pl?gene=AGTR2
CDK6	Cyclin Dependent Kinase 6	Protein Coding	Q00534	64	GC07M092604	20.2047	https://www.genecards.org/cgi-bin/carddisp.pl?gene=CDK6
ABCA7	ATP Binding Cassette Subfamily A Member 7	Protein Coding	Q8IZY2	58	GC19P121826	20.203	https://www.genecards.org/cgi-bin/carddisp.pl?gene=ABCA7
GSK3B	Glycogen Synthase Kinase 3 Beta	Protein Coding	P49841	64	GC03M119821	20.1995	https://www.genecards.org/cgi-bin/carddisp.pl?gene=GSK3B
MAPK10	Mitogen-Activated Protein Kinase 10	Protein Coding	P53779	60	GC04M085990	20.1978	https://www.genecards.org/cgi-bin/carddisp.pl?gene=MAPK10
XIST	X Inactive Specific Transcript	RNA Gene		33	GC0XM073820	20.189	https://www.genecards.org/cgi-bin/carddisp.pl?gene=XIST
HMGB1	High Mobility Group Box 1	Protein Coding	P09429	62	GC13M030456	20.1845	https://www.genecards.org/cgi-bin/carddisp.pl?gene=HMGB1
PTGDS	Prostaglandin D2 Synthase	Protein Coding	P41222	58	GC09P144367	20.1781	https://www.genecards.org/cgi-bin/carddisp.pl?gene=PTGDS
PNKD	PNKD Metallo-Beta-Lactamase Domain Containing	Protein Coding	Q8N490	54	GC02P218270	20.1493	https://www.genecards.org/cgi-bin/carddisp.pl?gene=PNKD
ABCC8	ATP Binding Cassette Subfamily C Member 8	Protein Coding	Q09428	59	GC11M017392	20.1341	https://www.genecards.org/cgi-bin/carddisp.pl?gene=ABCC8
GLI2	GLI Family Zinc Finger 2	Protein Coding	P10070	61	GC02P120735	20.126	https://www.genecards.org/cgi-bin/carddisp.pl?gene=GLI2
GAS5	Growth Arrest Specific 5	RNA Gene		33	GC01M173947	20.111	https://www.genecards.org/cgi-bin/carddisp.pl?gene=GAS5
FOS	Fos Proto-Oncogene, AP-1 Transcription Factor Subunit	Protein Coding	P01100	64	GC14P075278	20.1013	https://www.genecards.org/cgi-bin/carddisp.pl?gene=FOS
GLB1	Galactosidase Beta 1	Protein Coding	P16278	62	GC03M032963	20.0986	https://www.genecards.org/cgi-bin/carddisp.pl?gene=GLB1
GABRB3	Gamma-Aminobutyric Acid Type A Receptor Subunit Beta3	Protein Coding	P28472	61	GC15M026543	20.0956	https://www.genecards.org/cgi-bin/carddisp.pl?gene=GABRB3
DLG4	Discs Large MAGUK Scaffold Protein 4	Protein Coding	P78352	61	GC17M084127	20.0921	https://www.genecards.org/cgi-bin/carddisp.pl?gene=DLG4
CDK4	Cyclin Dependent Kinase 4	Protein Coding	P11802	67	GC12M059651	20.0866	https://www.genecards.org/cgi-bin/carddisp.pl?gene=CDK4
SCARNA5	Small Cajal Body-Specific RNA 5	RNA Gene		28	GC02P233275	20.0821	https://www.genecards.org/cgi-bin/carddisp.pl?gene=SCARNA5
CNR1	Cannabinoid Receptor 1	Protein Coding	P21554	59	GC06M088139	20.0785	https://www.genecards.org/cgi-bin/carddisp.pl?gene=CNR1
MFN2	Mitofusin 2	Protein Coding	O95140	61	GC01P011980	20.0341	https://www.genecards.org/cgi-bin/carddisp.pl?gene=MFN2
ABCG2	ATP Binding Cassette Subfamily G Member 2 (JR Blood Group)	Protein Coding	Q9UNQ0	63	GC04M088090	20.0216	https://www.genecards.org/cgi-bin/carddisp.pl?gene=ABCG2
EDN1	Endothelin 1	Protein Coding	P05305	62	GC06P012237	20.0126	https://www.genecards.org/cgi-bin/carddisp.pl?gene=EDN1
ADSL	Adenylosuccinate Lyase	Protein Coding	P30566	59	GC22P040346	19.9944	https://www.genecards.org/cgi-bin/carddisp.pl?gene=ADSL
GNAS	GNAS Complex Locus	Protein Coding	P84996	62	GC20P058839	19.9893	https://www.genecards.org/cgi-bin/carddisp.pl?gene=GNAS
RNASEH2A	Ribonuclease H2 Subunit A	Protein Coding	O75792	56	GC19P122442	19.9754	https://www.genecards.org/cgi-bin/carddisp.pl?gene=RNASEH2A
LAMB1	Laminin Subunit Beta 1	Protein Coding	P07942	63	GC07M107923	19.9566	https://www.genecards.org/cgi-bin/carddisp.pl?gene=LAMB1
SPR	Sepiapterin Reductase	Protein Coding	P35270	63	GC02P072887	19.9519	https://www.genecards.org/cgi-bin/carddisp.pl?gene=SPR
SIX3	SIX Homeobox 3	Protein Coding	O95343	55	GC02P044941	19.9423	https://www.genecards.org/cgi-bin/carddisp.pl?gene=SIX3
MEN1	Menin 1	Protein Coding	O00255	58	GC11M064803	19.9402	https://www.genecards.org/cgi-bin/carddisp.pl?gene=MEN1
CCDC88C	Coiled-Coil Domain Containing 88C	Protein Coding	Q9P219	52	GC14M091271	19.9056	https://www.genecards.org/cgi-bin/carddisp.pl?gene=CCDC88C
DHFR	Dihydrofolate Reductase	Protein Coding	P00374	61	GC05M080626	19.8768	https://www.genecards.org/cgi-bin/carddisp.pl?gene=DHFR
STX1A	Syntaxin 1A	Protein Coding	Q16623	60	GC07M074737	19.8492	https://www.genecards.org/cgi-bin/carddisp.pl?gene=STX1A
ABAT	4-Aminobutyrate Aminotransferase	Protein Coding	P80404	59	GC16P008674	19.8474	https://www.genecards.org/cgi-bin/carddisp.pl?gene=ABAT
MMP2	Matrix Metallopeptidase 2	Protein Coding	P08253	66	GC16P097295	19.8169	https://www.genecards.org/cgi-bin/carddisp.pl?gene=MMP2
ADNP	Activity Dependent Neuroprotector Homeobox	Protein Coding	Q9H2P0	56	GC20M050888	19.8168	https://www.genecards.org/cgi-bin/carddisp.pl?gene=ADNP
EPHB2	EPH Receptor B2	Protein Coding	P29323	65	GC01P022710	19.7945	https://www.genecards.org/cgi-bin/carddisp.pl?gene=EPHB2
ZFYVE26	Zinc Finger FYVE-Type Containing 26	Protein Coding	Q68DK2	51	GC14M067727	19.7733	https://www.genecards.org/cgi-bin/carddisp.pl?gene=ZFYVE26
TGIF1	TGFB Induced Factor Homeobox 1	Protein Coding	Q15583	58	GC18P003411	19.7676	https://www.genecards.org/cgi-bin/carddisp.pl?gene=TGIF1
RET	Ret Proto-Oncogene	Protein Coding	P07949	67	GC10P044766	19.7638	https://www.genecards.org/cgi-bin/carddisp.pl?gene=RET
GRIK2	Glutamate Ionotropic Receptor Kainate Type Subunit 2	Protein Coding	Q13002	62	GC06P100962	19.7556	https://www.genecards.org/cgi-bin/carddisp.pl?gene=GRIK2
PRKDC	Protein Kinase, DNA-Activated, Catalytic Subunit	Protein Coding	P78527	63	GC08M047773	19.7353	https://www.genecards.org/cgi-bin/carddisp.pl?gene=PRKDC
EIF2B5	Eukaryotic Translation Initiation Factor 2B Subunit Epsilon	Protein Coding	Q13144	56	GC03P184135	19.7299	https://www.genecards.org/cgi-bin/carddisp.pl?gene=EIF2B5
GJC2	Gap Junction Protein Gamma 2	Protein Coding	Q5T442	54	GC01P231789	19.7114	https://www.genecards.org/cgi-bin/carddisp.pl?gene=GJC2
SLC4A10	Solute Carrier Family 4 Member 10	Protein Coding	Q6U841	54	GC02P161426	19.7061	https://www.genecards.org/cgi-bin/carddisp.pl?gene=SLC4A10
PPP1R12A	Protein Phosphatase 1 Regulatory Subunit 12A	Protein Coding	O14974	58	GC12M079773	19.7038	https://www.genecards.org/cgi-bin/carddisp.pl?gene=PPP1R12A
NDUFS4	NADH:Ubiquinone Oxidoreductase Subunit S4	Protein Coding	O43181	56	GC05P053560	19.7029	https://www.genecards.org/cgi-bin/carddisp.pl?gene=NDUFS4
CD36	CD36 Molecule (CD36 Blood Group)	Protein Coding	P16671	63	GC07P080369	19.6947	https://www.genecards.org/cgi-bin/carddisp.pl?gene=CD36
FH	Fumarate Hydratase	Protein Coding	P07954	59	GC01M241499	19.6943	https://www.genecards.org/cgi-bin/carddisp.pl?gene=FH
GAL	Galanin And GMAP Prepropeptide	Protein Coding	P22466	58	GC11P094859	19.6901	https://www.genecards.org/cgi-bin/carddisp.pl?gene=GAL
AGT	Angiotensinogen	Protein Coding	P01019	63	GC01M230690	19.6894	https://www.genecards.org/cgi-bin/carddisp.pl?gene=AGT
MTRFR	Mitochondrial Translation Release Factor In Rescue	Protein Coding	Q9H3J6	46	GC12P134731	19.6825	https://www.genecards.org/cgi-bin/carddisp.pl?gene=MTRFR
MIR17	MicroRNA 17	RNA Gene		28	GC13P091350	19.6809	https://www.genecards.org/cgi-bin/carddisp.pl?gene=MIR17
ACTG1	Actin Gamma 1	Protein Coding	P63261	59	GC17M081509	19.6632	https://www.genecards.org/cgi-bin/carddisp.pl?gene=ACTG1
PPP3CA	Protein Phosphatase 3 Catalytic Subunit Alpha	Protein Coding	Q08209	64	GC04M101024	19.6565	https://www.genecards.org/cgi-bin/carddisp.pl?gene=PPP3CA
TPP1	Tripeptidyl Peptidase 1	Protein Coding	O14773	58	GC11M012790	19.6527	https://www.genecards.org/cgi-bin/carddisp.pl?gene=TPP1
ANK2	Ankyrin 2	Protein Coding	Q01484	54	GC04P112761	19.6509	https://www.genecards.org/cgi-bin/carddisp.pl?gene=ANK2
IL2	Interleukin 2	Protein Coding	P60568	59	GC04M122451	19.6326	https://www.genecards.org/cgi-bin/carddisp.pl?gene=IL2
LMNA	Lamin A/C	Protein Coding	P02545	62	GC01P156082	19.6031	https://www.genecards.org/cgi-bin/carddisp.pl?gene=LMNA
NSD1	Nuclear Receptor Binding SET Domain Protein 1	Protein Coding	Q96L73	56	GC05P187580	19.5912	https://www.genecards.org/cgi-bin/carddisp.pl?gene=NSD1
HTRA2	HtrA Serine Peptidase 2	Protein Coding	O43464	59	GC02P074529	19.5379	https://www.genecards.org/cgi-bin/carddisp.pl?gene=HTRA2
BCL11A	BCL11 Transcription Factor A	Protein Coding	Q9H165	57	GC02M060451	19.5378	https://www.genecards.org/cgi-bin/carddisp.pl?gene=BCL11A
PCNA	Proliferating Cell Nuclear Antigen	Protein Coding	P12004	63	GC20M005114	19.5357	https://www.genecards.org/cgi-bin/carddisp.pl?gene=PCNA
COL3A1	Collagen Type III Alpha 1 Chain	Protein Coding	P02461	61	GC02P188974	19.5201	https://www.genecards.org/cgi-bin/carddisp.pl?gene=COL3A1
HEXA	Hexosaminidase Subunit Alpha	Protein Coding	P06865	60	GC15M072340	19.4737	https://www.genecards.org/cgi-bin/carddisp.pl?gene=HEXA
GABBR1	Gamma-Aminobutyric Acid Type B Receptor Subunit 1	Protein Coding	Q9UBS5	62	GC06M029555	19.4494	https://www.genecards.org/cgi-bin/carddisp.pl?gene=GABBR1
HCN1	Hyperpolarization Activated Cyclic Nucleotide Gated Potassium Channel 1	Protein Coding	O60741	58	GC05M045260	19.4361	https://www.genecards.org/cgi-bin/carddisp.pl?gene=HCN1
PHGDH	Phosphoglycerate Dehydrogenase	Protein Coding	O43175	63	GC01P119664	19.417	https://www.genecards.org/cgi-bin/carddisp.pl?gene=PHGDH
RNASEH2B	Ribonuclease H2 Subunit B	Protein Coding	Q5TBB1	50	GC13P050909	19.4135	https://www.genecards.org/cgi-bin/carddisp.pl?gene=RNASEH2B
XDH	Xanthine Dehydrogenase	Protein Coding	P47989	60	GC02M031334	19.4134	https://www.genecards.org/cgi-bin/carddisp.pl?gene=XDH
CLN3	CLN3 Lysosomal/Endosomal Transmembrane Protein, Battenin	Protein Coding	Q13286	56	GC16M028466	19.4089	https://www.genecards.org/cgi-bin/carddisp.pl?gene=CLN3
SLC16A1	Solute Carrier Family 16 Member 1	Protein Coding	P53985	60	GC01M113114	19.3992	https://www.genecards.org/cgi-bin/carddisp.pl?gene=SLC16A1
CACNA1G	Calcium Voltage-Gated Channel Subunit Alpha1 G	Protein Coding	O43497	62	GC17P123374	19.3871	https://www.genecards.org/cgi-bin/carddisp.pl?gene=CACNA1G
SRC	SRC Proto-Oncogene, Non-Receptor Tyrosine Kinase	Protein Coding	P12931	64	GC20P037344	19.3793	https://www.genecards.org/cgi-bin/carddisp.pl?gene=SRC
CACNA1H	Calcium Voltage-Gated Channel Subunit Alpha1 H	Protein Coding	O95180	61	GC16P001153	19.3755	https://www.genecards.org/cgi-bin/carddisp.pl?gene=CACNA1H
FGF8	Fibroblast Growth Factor 8	Protein Coding	P55075	61	GC10M101770	19.3602	https://www.genecards.org/cgi-bin/carddisp.pl?gene=FGF8
L2HGDH	L-2-Hydroxyglutarate Dehydrogenase	Protein Coding	Q9H9P8	52	GC14M050237	19.3577	https://www.genecards.org/cgi-bin/carddisp.pl?gene=L2HGDH
PIK3R2	Phosphoinositide-3-Kinase Regulatory Subunit 2	Protein Coding	O00459	62	GC19P018153	19.3563	https://www.genecards.org/cgi-bin/carddisp.pl?gene=PIK3R2
NTF3	Neurotrophin 3	Protein Coding	P20783	57	GC12P042069	19.3495	https://www.genecards.org/cgi-bin/carddisp.pl?gene=NTF3
ACO2	Aconitase 2	Protein Coding	Q99798	59	GC22P076167	19.3407	https://www.genecards.org/cgi-bin/carddisp.pl?gene=ACO2
SLC39A8	Solute Carrier Family 39 Member 8	Protein Coding	Q9C0K1	56	GC04M102252	19.3391	https://www.genecards.org/cgi-bin/carddisp.pl?gene=SLC39A8
THBD	Thrombomodulin	Protein Coding	P07204	59	GC20M023026	19.3357	https://www.genecards.org/cgi-bin/carddisp.pl?gene=THBD
GNB1	G Protein Subunit Beta 1	Protein Coding	P62873	58	GC01M001785	19.3339	https://www.genecards.org/cgi-bin/carddisp.pl?gene=GNB1
SLC25A12	Solute Carrier Family 25 Member 12	Protein Coding	O75746	59	GC02M171783	19.3321	https://www.genecards.org/cgi-bin/carddisp.pl?gene=SLC25A12
PGR-AS1	PGR Antisense RNA 1	RNA Gene		20	GC11P101131	19.3246	https://www.genecards.org/cgi-bin/carddisp.pl?gene=PGR-AS1
SLC19A3	Solute Carrier Family 19 Member 3	Protein Coding	Q9BZV2	58	GC02M227685	19.299	https://www.genecards.org/cgi-bin/carddisp.pl?gene=SLC19A3
PTK2	Protein Tyrosine Kinase 2	Protein Coding	Q05397	61	GC08M140657	19.2983	https://www.genecards.org/cgi-bin/carddisp.pl?gene=PTK2
RAF1	Raf-1 Proto-Oncogene, Serine/Threonine Kinase	Protein Coding	P04049	67	GC03M012583	19.2873	https://www.genecards.org/cgi-bin/carddisp.pl?gene=RAF1
HCRT	Hypocretin Neuropeptide Precursor	Protein Coding	O43612	52	GC17M085215	19.2872	https://www.genecards.org/cgi-bin/carddisp.pl?gene=HCRT
NEFL	Neurofilament Light Chain	Protein Coding	P07196	58	GC08M024950	19.2719	https://www.genecards.org/cgi-bin/carddisp.pl?gene=NEFL
DCTN1	Dynactin Subunit 1	Protein Coding	Q14203	59	GC02M074361	19.269	https://www.genecards.org/cgi-bin/carddisp.pl?gene=DCTN1
EZR	Ezrin	Protein Coding	P15311	59	GC06M158765	19.2629	https://www.genecards.org/cgi-bin/carddisp.pl?gene=EZR
CHRNA4	Cholinergic Receptor Nicotinic Alpha 4 Subunit	Protein Coding	P43681	63	GC20M063343	19.2464	https://www.genecards.org/cgi-bin/carddisp.pl?gene=CHRNA4
SIGMAR1	Sigma Non-Opioid Intracellular Receptor 1	Protein Coding	Q99720	59	GC09M034634	19.2361	https://www.genecards.org/cgi-bin/carddisp.pl?gene=SIGMAR1
TWNK	Twinkle MtDNA Helicase	Protein Coding	Q96RR1	54	GC10P113017	19.2361	https://www.genecards.org/cgi-bin/carddisp.pl?gene=TWNK
VLDLR	Very Low Density Lipoprotein Receptor	Protein Coding	P98155	62	GC09P002611	19.2299	https://www.genecards.org/cgi-bin/carddisp.pl?gene=VLDLR
ZIC1	Zic Family Member 1	Protein Coding	Q15915	57	GC03P147393	19.2179	https://www.genecards.org/cgi-bin/carddisp.pl?gene=ZIC1
MME	Membrane Metalloendopeptidase	Protein Coding	P08473	63	GC03P155024	19.1592	https://www.genecards.org/cgi-bin/carddisp.pl?gene=MME
CAT	Catalase	Protein Coding	P04040	64	GC11P034460	19.1303	https://www.genecards.org/cgi-bin/carddisp.pl?gene=CAT
SYNJ1	Synaptojanin 1	Protein Coding	O43426	58	GC21M032628	19.1044	https://www.genecards.org/cgi-bin/carddisp.pl?gene=SYNJ1
SMARCA2	SWI/SNF Related, Matrix Associated, Actin Dependent Regulator Of Chromatin, Subfamily A, Member 2	Protein Coding	P51531	62	GC09P001980	19.0846	https://www.genecards.org/cgi-bin/carddisp.pl?gene=SMARCA2
SZT2	SZT2 Subunit Of KICSTOR Complex	Protein Coding	Q5T011	49	GC01P043389	19.0811	https://www.genecards.org/cgi-bin/carddisp.pl?gene=SZT2
EIF2B2	Eukaryotic Translation Initiation Factor 2B Subunit Beta	Protein Coding	P49770	56	GC14P075002	19.0638	https://www.genecards.org/cgi-bin/carddisp.pl?gene=EIF2B2
BMP2	Bone Morphogenetic Protein 2	Protein Coding	P12643	59	GC20P006767	19.063	https://www.genecards.org/cgi-bin/carddisp.pl?gene=BMP2
JUN	Jun Proto-Oncogene, AP-1 Transcription Factor Subunit	Protein Coding	P05412	63	GC01M058780	19.0594	https://www.genecards.org/cgi-bin/carddisp.pl?gene=JUN
RYR1	Ryanodine Receptor 1	Protein Coding	P21817	61	GC19P122999	19.0589	https://www.genecards.org/cgi-bin/carddisp.pl?gene=RYR1
SATB2	SATB Homeobox 2	Protein Coding	Q9UPW6	58	GC02M199269	19.0544	https://www.genecards.org/cgi-bin/carddisp.pl?gene=SATB2
CACNA1D	Calcium Voltage-Gated Channel Subunit Alpha1 D	Protein Coding	Q01668	60	GC03P053328	19.05	https://www.genecards.org/cgi-bin/carddisp.pl?gene=CACNA1D
ROGDI	Rogdi Atypical Leucine Zipper	Protein Coding	Q9GZN7	50	GC16M004796	19.043	https://www.genecards.org/cgi-bin/carddisp.pl?gene=ROGDI
SLC6A9	Solute Carrier Family 6 Member 9	Protein Coding	P48067	61	GC01M043991	19.0075	https://www.genecards.org/cgi-bin/carddisp.pl?gene=SLC6A9
NFKB1	Nuclear Factor Kappa B Subunit 1	Protein Coding	P19838	66	GC04P102501	19.0071	https://www.genecards.org/cgi-bin/carddisp.pl?gene=NFKB1
KCNT1	Potassium Sodium-Activated Channel Subfamily T Member 1	Protein Coding	Q5JUK3	54	GC09P135702	19.0055	https://www.genecards.org/cgi-bin/carddisp.pl?gene=KCNT1
DNMT1	DNA Methyltransferase 1	Protein Coding	P26358	66	GC19M010133	18.9972	https://www.genecards.org/cgi-bin/carddisp.pl?gene=DNMT1
CACNA1B	Calcium Voltage-Gated Channel Subunit Alpha1 B	Protein Coding	Q00975	62	GC09P137877	18.9945	https://www.genecards.org/cgi-bin/carddisp.pl?gene=CACNA1B
CLCN3	Chloride Voltage-Gated Channel 3	Protein Coding	P51790	57	GC04P169612	18.9925	https://www.genecards.org/cgi-bin/carddisp.pl?gene=CLCN3
TIMM8A	Translocase Of Inner Mitochondrial Membrane 8A	Protein Coding	O60220	54	GC0XM101345	18.9731	https://www.genecards.org/cgi-bin/carddisp.pl?gene=TIMM8A
OPA1	OPA1 Mitochondrial Dynamin Like GTPase	Protein Coding	O60313	56	GC03P193594	18.9693	https://www.genecards.org/cgi-bin/carddisp.pl?gene=OPA1
KIF5A	Kinesin Family Member 5A	Protein Coding	Q12840	58	GC12P062080	18.9614	https://www.genecards.org/cgi-bin/carddisp.pl?gene=KIF5A
GATM	Glycine Amidinotransferase	Protein Coding	P50440	58	GC15M045361	18.9522	https://www.genecards.org/cgi-bin/carddisp.pl?gene=GATM
GATA3	GATA Binding Protein 3	Protein Coding	P23771	63	GC10P008045	18.9471	https://www.genecards.org/cgi-bin/carddisp.pl?gene=GATA3
CHMP2B	Charged Multivesicular Body Protein 2B	Protein Coding	Q9UQN3	56	GC03P087227	18.9311	https://www.genecards.org/cgi-bin/carddisp.pl?gene=CHMP2B
ACADM	Acyl-CoA Dehydrogenase Medium Chain	Protein Coding	P11310	58	GC01P075724	18.9301	https://www.genecards.org/cgi-bin/carddisp.pl?gene=ACADM
SPG7	SPG7 Matrix AAA Peptidase Subunit, Paraplegin	Protein Coding	Q9UQ90	55	GC16P098829	18.9246	https://www.genecards.org/cgi-bin/carddisp.pl?gene=SPG7
OPHN1	Oligophrenin 1	Protein Coding	O60890	55	GC0XM067949	18.9099	https://www.genecards.org/cgi-bin/carddisp.pl?gene=OPHN1
CALM1	Calmodulin 1	Protein Coding	P0DP23	59	GC14P090396	18.9077	https://www.genecards.org/cgi-bin/carddisp.pl?gene=CALM1
PDCD10	Programmed Cell Death 10	Protein Coding	Q9BUL8	54	GC03M167683	18.9039	https://www.genecards.org/cgi-bin/carddisp.pl?gene=PDCD10
RAC3	Rac Family Small GTPase 3	Protein Coding	P60763	57	GC17P082031	18.8991	https://www.genecards.org/cgi-bin/carddisp.pl?gene=RAC3
HEXB	Hexosaminidase Subunit Beta	Protein Coding	P07686	60	GC05P074640	18.8986	https://www.genecards.org/cgi-bin/carddisp.pl?gene=HEXB
TRIM8	Tripartite Motif Containing 8	Protein Coding	Q9BZR9	50	GC10P113132	18.8894	https://www.genecards.org/cgi-bin/carddisp.pl?gene=TRIM8
CFH	Complement Factor H	Protein Coding	P08603	60	GC01P196621	18.8887	https://www.genecards.org/cgi-bin/carddisp.pl?gene=CFH
SOX11	SRY-Box Transcription Factor 11	Protein Coding	P35716	54	GC02P005707	18.8832	https://www.genecards.org/cgi-bin/carddisp.pl?gene=SOX11
SAMHD1	SAM And HD Domain Containing Deoxynucleoside Triphosphate Triphosphohydrolase 1	Protein Coding	Q9Y3Z3	55	GC20M036890	18.878	https://www.genecards.org/cgi-bin/carddisp.pl?gene=SAMHD1
PYCR2	Pyrroline-5-Carboxylate Reductase 2	Protein Coding	Q96C36	58	GC01M225919	18.8707	https://www.genecards.org/cgi-bin/carddisp.pl?gene=PYCR2
STIL	STIL Centriolar Assembly Protein	Protein Coding	Q15468	52	GC01M047250	18.8597	https://www.genecards.org/cgi-bin/carddisp.pl?gene=STIL
ALPL	Alkaline Phosphatase, Biomineralization Associated	Protein Coding	P05186	63	GC01P021508	18.8559	https://www.genecards.org/cgi-bin/carddisp.pl?gene=ALPL
WWOX	WW Domain Containing Oxidoreductase	Protein Coding	Q9NZC7	59	GC16P078099	18.8557	https://www.genecards.org/cgi-bin/carddisp.pl?gene=WWOX
TUBA8	Tubulin Alpha 8	Protein Coding	Q9NY65	57	GC22P018110	18.8554	https://www.genecards.org/cgi-bin/carddisp.pl?gene=TUBA8
CAMK2B	Calcium/Calmodulin Dependent Protein Kinase II Beta	Protein Coding	Q13554	63	GC07M045430	18.8435	https://www.genecards.org/cgi-bin/carddisp.pl?gene=CAMK2B
CCK	Cholecystokinin	Protein Coding	P06307	55	GC03M042274	18.8338	https://www.genecards.org/cgi-bin/carddisp.pl?gene=CCK
DBH	Dopamine Beta-Hydroxylase	Protein Coding	P09172	64	GC09P133636	18.8306	https://www.genecards.org/cgi-bin/carddisp.pl?gene=DBH
NEDD4L	NEDD4 Like E3 Ubiquitin Protein Ligase	Protein Coding	Q96PU5	58	GC18P058044	18.8277	https://www.genecards.org/cgi-bin/carddisp.pl?gene=NEDD4L
MIR125A	MicroRNA 125a	RNA Gene		31	GC19P123545	18.8241	https://www.genecards.org/cgi-bin/carddisp.pl?gene=MIR125A
ATN1	Atrophin 1	Protein Coding	P54259	56	GC12P042125	18.8215	https://www.genecards.org/cgi-bin/carddisp.pl?gene=ATN1
CIC	Capicua Transcriptional Repressor	Protein Coding	Q96RK0	56	GC19P042268	18.8117	https://www.genecards.org/cgi-bin/carddisp.pl?gene=CIC
FOLR1	Folate Receptor Alpha	Protein Coding	P15328	62	GC11P095015	18.7749	https://www.genecards.org/cgi-bin/carddisp.pl?gene=FOLR1
HSD17B10	Hydroxysteroid 17-Beta Dehydrogenase 10	Protein Coding	Q99714	60	GC0XM053431	18.7694	https://www.genecards.org/cgi-bin/carddisp.pl?gene=HSD17B10
RAB3GAP2	RAB3 GTPase Activating Non-Catalytic Protein Subunit 2	Protein Coding	Q9H2M9	52	GC01M220237	18.7691	https://www.genecards.org/cgi-bin/carddisp.pl?gene=RAB3GAP2
TSEN54	TRNA Splicing Endonuclease Subunit 54	Protein Coding	Q7Z6J9	51	GC17P075515	18.7583	https://www.genecards.org/cgi-bin/carddisp.pl?gene=TSEN54
NEXMIF	Neurite Extension And Migration Factor	Protein Coding	Q5QGS0	44	GC0XM074813	18.7449	https://www.genecards.org/cgi-bin/carddisp.pl?gene=NEXMIF
ATL1	Atlastin GTPase 1	Protein Coding	Q8WXF7	53	GC14P050532	18.7274	https://www.genecards.org/cgi-bin/carddisp.pl?gene=ATL1
GABRD	Gamma-Aminobutyric Acid Type A Receptor Subunit Delta	Protein Coding	O14764	58	GC01P002019	18.7199	https://www.genecards.org/cgi-bin/carddisp.pl?gene=GABRD
GABRA5	Gamma-Aminobutyric Acid Type A Receptor Subunit Alpha5	Protein Coding	P31644	60	GC15P026866	18.7011	https://www.genecards.org/cgi-bin/carddisp.pl?gene=GABRA5
C9orf72	C9orf72-SMCR8 Complex Subunit	Protein Coding	Q96LT7	54	GC09M029743	18.6993	https://www.genecards.org/cgi-bin/carddisp.pl?gene=C9orf72
ERBB2	Erb-B2 Receptor Tyrosine Kinase 2	Protein Coding	P04626	68	GC17P039687	18.6973	https://www.genecards.org/cgi-bin/carddisp.pl?gene=ERBB2
CLN5	CLN5 Intracellular Trafficking Protein	Protein Coding	O75503	53	GC13P076990	18.6837	https://www.genecards.org/cgi-bin/carddisp.pl?gene=CLN5
NR4A2	Nuclear Receptor Subfamily 4 Group A Member 2	Protein Coding	P43354	58	GC02M156324	18.6833	https://www.genecards.org/cgi-bin/carddisp.pl?gene=NR4A2
MIR25	MicroRNA 25	RNA Gene		29	GC07M100093	18.6674	https://www.genecards.org/cgi-bin/carddisp.pl?gene=MIR25
NEAT1	Nuclear Paraspeckle Assembly Transcript 1	RNA Gene		34	GC11P094620	18.6547	https://www.genecards.org/cgi-bin/carddisp.pl?gene=NEAT1
WDR45B	WD Repeat Domain 45B	Protein Coding	Q5MNZ6	50	GC17M082614	18.6395	https://www.genecards.org/cgi-bin/carddisp.pl?gene=WDR45B
FGF17	Fibroblast Growth Factor 17	Protein Coding	O60258	58	GC08P022084	18.6326	https://www.genecards.org/cgi-bin/carddisp.pl?gene=FGF17
BCR	BCR Activator Of RhoGEF And GTPase	Protein Coding	P11274	65	GC22P023179	18.617	https://www.genecards.org/cgi-bin/carddisp.pl?gene=BCR
CRAT	Carnitine O-Acetyltransferase	Protein Coding	P43155	58	GC09M129094	18.6104	https://www.genecards.org/cgi-bin/carddisp.pl?gene=CRAT
MTR	5-Methyltetrahydrofolate-Homocysteine Methyltransferase	Protein Coding	Q99707	60	GC01P236795	18.5908	https://www.genecards.org/cgi-bin/carddisp.pl?gene=MTR
BCOR	BCL6 Corepressor	Protein Coding	Q6W2J9	56	GC0XM040049	18.5881	https://www.genecards.org/cgi-bin/carddisp.pl?gene=BCOR
ST3GAL5	ST3 Beta-Galactoside Alpha-2,3-Sialyltransferase 5	Protein Coding	Q9UNP4	59	GC02M085839	18.5701	https://www.genecards.org/cgi-bin/carddisp.pl?gene=ST3GAL5
BSCL2	BSCL2 Lipid Droplet Biogenesis Associated, Seipin	Protein Coding	Q96G97	55	GC11M128857	18.5506	https://www.genecards.org/cgi-bin/carddisp.pl?gene=BSCL2
BPTF	Bromodomain PHD Finger Transcription Factor	Protein Coding	Q12830	55	GC17P067825	18.5464	https://www.genecards.org/cgi-bin/carddisp.pl?gene=BPTF
GABRB2	Gamma-Aminobutyric Acid Type A Receptor Subunit Beta2	Protein Coding	P47870	60	GC05M161288	18.5432	https://www.genecards.org/cgi-bin/carddisp.pl?gene=GABRB2
CDH1	Cadherin 1	Protein Coding	P12830	62	GC16P068737	18.5304	https://www.genecards.org/cgi-bin/carddisp.pl?gene=CDH1
ACVR1	Activin A Receptor Type 1	Protein Coding	Q04771	64	GC02M157736	18.5236	https://www.genecards.org/cgi-bin/carddisp.pl?gene=ACVR1
MVK	Mevalonate Kinase	Protein Coding	Q03426	60	GC12P109573	18.5153	https://www.genecards.org/cgi-bin/carddisp.pl?gene=MVK
KAT6B	Lysine Acetyltransferase 6B	Protein Coding	Q8WYB5	57	GC10P074985	18.5068	https://www.genecards.org/cgi-bin/carddisp.pl?gene=KAT6B
TRAPPC11	Trafficking Protein Particle Complex Subunit 11	Protein Coding	Q7Z392	50	GC04P183659	18.5008	https://www.genecards.org/cgi-bin/carddisp.pl?gene=TRAPPC11
CEP290	Centrosomal Protein 290	Protein Coding	O15078	53	GC12M088049	18.4964	https://www.genecards.org/cgi-bin/carddisp.pl?gene=CEP290
F3	Coagulation Factor III, Tissue Factor	Protein Coding	P13726	58	GC01M094916	18.4871	https://www.genecards.org/cgi-bin/carddisp.pl?gene=F3
CASP8	Caspase 8	Protein Coding	Q14790	65	GC02P201233	18.4785	https://www.genecards.org/cgi-bin/carddisp.pl?gene=CASP8
CLN6	CLN6 Transmembrane ER Protein	Protein Coding	Q9NWW5	50	GC15M068206	18.4766	https://www.genecards.org/cgi-bin/carddisp.pl?gene=CLN6
CYCS	Cytochrome C, Somatic	Protein Coding	P99999	61	GC07M025118	18.4716	https://www.genecards.org/cgi-bin/carddisp.pl?gene=CYCS
AIMP1	Aminoacyl TRNA Synthetase Complex Interacting Multifunctional Protein 1	Protein Coding	Q12904	58	GC04P106315	18.4709	https://www.genecards.org/cgi-bin/carddisp.pl?gene=AIMP1
DDX3X	DEAD-Box Helicase 3 X-Linked	Protein Coding	O00571	62	GC0XP041333	18.4705	https://www.genecards.org/cgi-bin/carddisp.pl?gene=DDX3X
DMXL2	Dmx Like 2	Protein Coding	Q8TDJ6	49	GC15M051447	18.4664	https://www.genecards.org/cgi-bin/carddisp.pl?gene=DMXL2
PC	Pyruvate Carboxylase	Protein Coding	P11498	60	GC11M066848	18.4419	https://www.genecards.org/cgi-bin/carddisp.pl?gene=PC
VCAM1	Vascular Cell Adhesion Molecule 1	Protein Coding	P19320	59	GC01P100719	18.4326	https://www.genecards.org/cgi-bin/carddisp.pl?gene=VCAM1
NES	Nestin	Protein Coding	P48681	53	GC01M156668	18.4228	https://www.genecards.org/cgi-bin/carddisp.pl?gene=NES
ARHGEF9	Cdc42 Guanine Nucleotide Exchange Factor 9	Protein Coding	O43307	54	GC0XM063634	18.4201	https://www.genecards.org/cgi-bin/carddisp.pl?gene=ARHGEF9
SYNE1	Spectrin Repeat Containing Nuclear Envelope Protein 1	Protein Coding	Q8NF91	54	GC06M152121	18.4175	https://www.genecards.org/cgi-bin/carddisp.pl?gene=SYNE1
AGER	Advanced Glycosylation End-Product Specific Receptor	Protein Coding	Q15109	59	GC06M032180	18.413	https://www.genecards.org/cgi-bin/carddisp.pl?gene=AGER
CD4	CD4 Molecule	Protein Coding	P01730	63	GC12P006786	18.4047	https://www.genecards.org/cgi-bin/carddisp.pl?gene=CD4
GAPDH	Glyceraldehyde-3-Phosphate Dehydrogenase	Protein Coding	P04406	64	GC12P042102	18.3987	https://www.genecards.org/cgi-bin/carddisp.pl?gene=GAPDH
MAPK8IP1	Mitogen-Activated Protein Kinase 8 Interacting Protein 1	Protein Coding	Q9UQF2	56	GC11P048024	18.3867	https://www.genecards.org/cgi-bin/carddisp.pl?gene=MAPK8IP1
TXN2	Thioredoxin 2	Protein Coding	Q99757	55	GC22M036467	18.3814	https://www.genecards.org/cgi-bin/carddisp.pl?gene=TXN2
FARS2	Phenylalanyl-TRNA Synthetase 2, Mitochondrial	Protein Coding	O95363	56	GC06P007187	18.3797	https://www.genecards.org/cgi-bin/carddisp.pl?gene=FARS2
ARNT2	Aryl Hydrocarbon Receptor Nuclear Translocator 2	Protein Coding	Q9HBZ2	56	GC15P080404	18.377	https://www.genecards.org/cgi-bin/carddisp.pl?gene=ARNT2
G6PC1	Glucose-6-Phosphatase Catalytic Subunit 1	Protein Coding	P35575	56	GC17P124441	18.376	https://www.genecards.org/cgi-bin/carddisp.pl?gene=G6PC1
SPTBN4	Spectrin Beta, Non-Erythrocytic 4	Protein Coding	Q9H254	53	GC19P040466	18.3593	https://www.genecards.org/cgi-bin/carddisp.pl?gene=SPTBN4
KDM6A	Lysine Demethylase 6A	Protein Coding	O15550	60	GC0XP044873	18.3513	https://www.genecards.org/cgi-bin/carddisp.pl?gene=KDM6A
GPHN	Gephyrin	Protein Coding	Q9NQX3	61	GC14P066507	18.3465	https://www.genecards.org/cgi-bin/carddisp.pl?gene=GPHN
CSTB	Cystatin B	Protein Coding	P04080	59	GC21M043772	18.3412	https://www.genecards.org/cgi-bin/carddisp.pl?gene=CSTB
GNRH1	Gonadotropin Releasing Hormone 1	Protein Coding	P01148	53	GC08M025419	18.3284	https://www.genecards.org/cgi-bin/carddisp.pl?gene=GNRH1
HECW2	HECT, C2 And WW Domain Containing E3 Ubiquitin Protein Ligase 2	Protein Coding	Q9P2P5	54	GC02M196194	18.3252	https://www.genecards.org/cgi-bin/carddisp.pl?gene=HECW2
POLR3B	RNA Polymerase III Subunit B	Protein Coding	Q9NW08	56	GC12P106357	18.3242	https://www.genecards.org/cgi-bin/carddisp.pl?gene=POLR3B
QARS1	Glutaminyl-TRNA Synthetase 1	Protein Coding	P47897	44	GC03M053991	18.3219	https://www.genecards.org/cgi-bin/carddisp.pl?gene=QARS1
YAP1	Yes1 Associated Transcriptional Regulator	Protein Coding	P46937	60	GC11P102110	18.3186	https://www.genecards.org/cgi-bin/carddisp.pl?gene=YAP1
BCL2L1	BCL2 Like 1	Protein Coding	Q07817	62	GC20M031664	18.3147	https://www.genecards.org/cgi-bin/carddisp.pl?gene=BCL2L1
UCP2	Uncoupling Protein 2	Protein Coding	P55851	59	GC11M073974	18.3087	https://www.genecards.org/cgi-bin/carddisp.pl?gene=UCP2
OFD1	OFD1 Centriole And Centriolar Satellite Protein	Protein Coding	O75665	55	GC0XP013714	18.3045	https://www.genecards.org/cgi-bin/carddisp.pl?gene=OFD1
CENPJ	Centromere Protein J	Protein Coding	Q9HC77	54	GC13M024882	18.3029	https://www.genecards.org/cgi-bin/carddisp.pl?gene=CENPJ
IGF2	Insulin Like Growth Factor 2	Protein Coding	P01344	62	GC11M012582	18.2811	https://www.genecards.org/cgi-bin/carddisp.pl?gene=IGF2
GABBR2	Gamma-Aminobutyric Acid Type B Receptor Subunit 2	Protein Coding	O75899	61	GC09M098288	18.268	https://www.genecards.org/cgi-bin/carddisp.pl?gene=GABBR2
MT-TL1	Mitochondrially Encoded TRNA-Leu (UUA/G) 1	RNA Gene		25	GCMTP003232	18.2485	https://www.genecards.org/cgi-bin/carddisp.pl?gene=MT-TL1
KDR	Kinase Insert Domain Receptor	Protein Coding	P35968	67	GC04M055078	18.2365	https://www.genecards.org/cgi-bin/carddisp.pl?gene=KDR
KCNJ2	Potassium Inwardly Rectifying Channel Subfamily J Member 2	Protein Coding	P63252	61	GC17P070168	18.2184	https://www.genecards.org/cgi-bin/carddisp.pl?gene=KCNJ2
PAK3	P21 (RAC1) Activated Kinase 3	Protein Coding	O75914	62	GC0XP110944	18.2055	https://www.genecards.org/cgi-bin/carddisp.pl?gene=PAK3
MACF1	Microtubule Actin Crosslinking Factor 1	Protein Coding	O94854	55	GC01P054194	18.2	https://www.genecards.org/cgi-bin/carddisp.pl?gene=MACF1
NRXN1	Neurexin 1	Protein Coding	Q9ULB1	60	GC02M049918	18.1943	https://www.genecards.org/cgi-bin/carddisp.pl?gene=NRXN1
EPM2A	EPM2A Glucan Phosphatase, Laforin	Protein Coding	B3EWF7	54	GC06M145382	18.1933	https://www.genecards.org/cgi-bin/carddisp.pl?gene=EPM2A
SLC9A6	Solute Carrier Family 9 Member A6	Protein Coding	Q92581	58	GC0XP135985	18.1823	https://www.genecards.org/cgi-bin/carddisp.pl?gene=SLC9A6
CACNA1E	Calcium Voltage-Gated Channel Subunit Alpha1 E	Protein Coding	Q15878	59	GC01P181317	18.1791	https://www.genecards.org/cgi-bin/carddisp.pl?gene=CACNA1E
RAB18	RAB18, Member RAS Oncogene Family	Protein Coding	Q9NP72	51	GC10P027504	18.1783	https://www.genecards.org/cgi-bin/carddisp.pl?gene=RAB18
SGCE	Sarcoglycan Epsilon	Protein Coding	O43556	55	GC07M094524	18.1735	https://www.genecards.org/cgi-bin/carddisp.pl?gene=SGCE
CCND2	Cyclin D2	Protein Coding	P30279	61	GC12P042059	18.1443	https://www.genecards.org/cgi-bin/carddisp.pl?gene=CCND2
MOCS2	Molybdenum Cofactor Synthesis 2	Protein Coding	O96033	55	GC05M053095	18.1396	https://www.genecards.org/cgi-bin/carddisp.pl?gene=MOCS2
SYT1	Synaptotagmin 1	Protein Coding	P21579	61	GC12P078863	18.1187	https://www.genecards.org/cgi-bin/carddisp.pl?gene=SYT1
ITPR1	Inositol 1,4,5-Trisphosphate Receptor Type 1	Protein Coding	Q14643	62	GC03P004486	18.1166	https://www.genecards.org/cgi-bin/carddisp.pl?gene=ITPR1
PRPS1	Phosphoribosyl Pyrophosphate Synthetase 1	Protein Coding	P60891	59	GC0XP107628	18.1165	https://www.genecards.org/cgi-bin/carddisp.pl?gene=PRPS1
PPP2R1A	Protein Phosphatase 2 Scaffold Subunit Aalpha	Protein Coding	P30153	60	GC19P123559	18.1115	https://www.genecards.org/cgi-bin/carddisp.pl?gene=PPP2R1A
ANKLE2	Ankyrin Repeat And LEM Domain Containing 2	Protein Coding	Q86XL3	52	GC12M132725	18.1057	https://www.genecards.org/cgi-bin/carddisp.pl?gene=ANKLE2
ACVRL1	Activin A Receptor Like Type 1	Protein Coding	P37023	63	GC12P051906	18.0877	https://www.genecards.org/cgi-bin/carddisp.pl?gene=ACVRL1
RTTN	Rotatin	Protein Coding	Q86VV8	50	GC18M070003	18.0862	https://www.genecards.org/cgi-bin/carddisp.pl?gene=RTTN
HAVCR1	Hepatitis A Virus Cellular Receptor 1	Protein Coding	Q96D42	56	GC05M157028	18.0839	https://www.genecards.org/cgi-bin/carddisp.pl?gene=HAVCR1
CAMK2A	Calcium/Calmodulin Dependent Protein Kinase II Alpha	Protein Coding	Q9UQM7	66	GC05M150219	18.0786	https://www.genecards.org/cgi-bin/carddisp.pl?gene=CAMK2A
ECE1	Endothelin Converting Enzyme 1	Protein Coding	P42892	62	GC01M021217	18.0371	https://www.genecards.org/cgi-bin/carddisp.pl?gene=ECE1
EIF2B1	Eukaryotic Translation Initiation Factor 2B Subunit Alpha	Protein Coding	Q14232	55	GC12M123620	18.0357	https://www.genecards.org/cgi-bin/carddisp.pl?gene=EIF2B1
FUCA1	Alpha-L-Fucosidase 1	Protein Coding	P04066	61	GC01M023845	18.0319	https://www.genecards.org/cgi-bin/carddisp.pl?gene=FUCA1
ITGAM	Integrin Subunit Alpha M	Protein Coding	P11215	61	GC16P096773	18.023	https://www.genecards.org/cgi-bin/carddisp.pl?gene=ITGAM
ROBO1	Roundabout Guidance Receptor 1	Protein Coding	Q9Y6N7	58	GC03M078597	18.0221	https://www.genecards.org/cgi-bin/carddisp.pl?gene=ROBO1
MIR133B	MicroRNA 133b	RNA Gene		31	GC06P052148	18.0172	https://www.genecards.org/cgi-bin/carddisp.pl?gene=MIR133B
SLC1A4	Solute Carrier Family 1 Member 4	Protein Coding	P43007	57	GC02P064988	17.9879	https://www.genecards.org/cgi-bin/carddisp.pl?gene=SLC1A4
PIGU	Phosphatidylinositol Glycan Anchor Biosynthesis Class U	Protein Coding	Q9H490	50	GC20M034560	17.9843	https://www.genecards.org/cgi-bin/carddisp.pl?gene=PIGU
MIR155	MicroRNA 155	RNA Gene		31	GC21P025573	17.9636	https://www.genecards.org/cgi-bin/carddisp.pl?gene=MIR155
FTO	FTO Alpha-Ketoglutarate Dependent Dioxygenase	Protein Coding	Q9C0B1	59	GC16P097259	17.9442	https://www.genecards.org/cgi-bin/carddisp.pl?gene=FTO
BAX	BCL2 Associated X, Apoptosis Regulator	Protein Coding	Q07812	64	GC19P048954	17.9294	https://www.genecards.org/cgi-bin/carddisp.pl?gene=BAX
KATNB1	Katanin Regulatory Subunit B1	Protein Coding	Q9BVA0	54	GC16P057735	17.913	https://www.genecards.org/cgi-bin/carddisp.pl?gene=KATNB1
VPS11	VPS11 Core Subunit Of CORVET And HOPS Complexes	Protein Coding	Q9H270	55	GC11P119067	17.9075	https://www.genecards.org/cgi-bin/carddisp.pl?gene=VPS11
ATP7A	ATPase Copper Transporting Alpha	Protein Coding	Q04656	58	GC0XP078188	17.9055	https://www.genecards.org/cgi-bin/carddisp.pl?gene=ATP7A
ZIC2	Zic Family Member 2	Protein Coding	O95409	56	GC13P099981	17.9011	https://www.genecards.org/cgi-bin/carddisp.pl?gene=ZIC2
STAT2	Signal Transducer And Activator Of Transcription 2	Protein Coding	P52630	62	GC12M056341	17.8878	https://www.genecards.org/cgi-bin/carddisp.pl?gene=STAT2
TMEM106B	Transmembrane Protein 106B	Protein Coding	Q9NUM4	52	GC07P014077	17.8777	https://www.genecards.org/cgi-bin/carddisp.pl?gene=TMEM106B
FOXP1	Forkhead Box P1	Protein Coding	Q9H334	58	GC03M070954	17.8705	https://www.genecards.org/cgi-bin/carddisp.pl?gene=FOXP1
AP4M1	Adaptor Related Protein Complex 4 Subunit Mu 1	Protein Coding	O00189	50	GC07P107481	17.8532	https://www.genecards.org/cgi-bin/carddisp.pl?gene=AP4M1
PRODH	Proline Dehydrogenase 1	Protein Coding	O43272	58	GC22M018912	17.844	https://www.genecards.org/cgi-bin/carddisp.pl?gene=PRODH
LAMP2	Lysosomal Associated Membrane Protein 2	Protein Coding	P13473	58	GC0XM120426	17.8308	https://www.genecards.org/cgi-bin/carddisp.pl?gene=LAMP2
CERS1	Ceramide Synthase 1	Protein Coding	P27544	55	GC19M018868	17.8289	https://www.genecards.org/cgi-bin/carddisp.pl?gene=CERS1
GUSB	Glucuronidase Beta	Protein Coding	P08236	62	GC07M065960	17.8139	https://www.genecards.org/cgi-bin/carddisp.pl?gene=GUSB
PLG	Plasminogen	Protein Coding	P00747	62	GC06P160702	17.808	https://www.genecards.org/cgi-bin/carddisp.pl?gene=PLG
NAXD	NAD(P)HX Dehydratase	Protein Coding	Q8IW45	50	GC13P110963	17.7961	https://www.genecards.org/cgi-bin/carddisp.pl?gene=NAXD
ASTN2	Astrotactin 2	Protein Coding	O75129	50	GC09M117929	17.7919	https://www.genecards.org/cgi-bin/carddisp.pl?gene=ASTN2
PDHA1	Pyruvate Dehydrogenase E1 Subunit Alpha 1	Protein Coding	P08559	60	GC0XP019343	17.7869	https://www.genecards.org/cgi-bin/carddisp.pl?gene=PDHA1
LOC126863256	BRD4-Independent Group 4 Enhancer GRCh37_chrX:48934848-48936047	Functional Element		9	GC0XP058781	17.7832	https://www.genecards.org/cgi-bin/carddisp.pl?gene=LOC126863256
CSF3	Colony Stimulating Factor 3	Protein Coding	P09919	54	GC17P040015	17.7772	https://www.genecards.org/cgi-bin/carddisp.pl?gene=CSF3
AKT2	AKT Serine/Threonine Kinase 2	Protein Coding	P31751	67	GC19M040230	17.7763	https://www.genecards.org/cgi-bin/carddisp.pl?gene=AKT2
EHMT1	Euchromatic Histone Lysine Methyltransferase 1	Protein Coding	Q9H9B1	58	GC09P137618	17.7734	https://www.genecards.org/cgi-bin/carddisp.pl?gene=EHMT1
DYSF	Dysferlin	Protein Coding	O75923	56	GC02P071453	17.7413	https://www.genecards.org/cgi-bin/carddisp.pl?gene=DYSF
CLPB	ClpB Family Mitochondrial Disaggregase	Protein Coding	Q9H078	56	GC11M129250	17.736	https://www.genecards.org/cgi-bin/carddisp.pl?gene=CLPB
ADGRB1	Adhesion G Protein-Coupled Receptor B1	Protein Coding	O14514	48	GC08P142449	17.7323	https://www.genecards.org/cgi-bin/carddisp.pl?gene=ADGRB1
KARS1	Lysyl-TRNA Synthetase 1	Protein Coding	Q15046	58	GC16M076029	17.7301	https://www.genecards.org/cgi-bin/carddisp.pl?gene=KARS1
MAPK8	Mitogen-Activated Protein Kinase 8	Protein Coding	P45983	62	GC10P048306	17.7279	https://www.genecards.org/cgi-bin/carddisp.pl?gene=MAPK8
TECPR2	Tectonin Beta-Propeller Repeat Containing 2	Protein Coding	O15040	48	GC14P102362	17.7261	https://www.genecards.org/cgi-bin/carddisp.pl?gene=TECPR2
ATP6AP2	ATPase H+ Transporting Accessory Protein 2	Protein Coding	O75787	58	GC0XP040634	17.7171	https://www.genecards.org/cgi-bin/carddisp.pl?gene=ATP6AP2
MCOLN1	Mucolipin TRP Cation Channel 1	Protein Coding	Q9GZU1	56	GC19P122123	17.7084	https://www.genecards.org/cgi-bin/carddisp.pl?gene=MCOLN1
ADAMTS13	ADAM Metallopeptidase With Thrombospondin Type 1 Motif 13	Protein Coding	Q76LX8	61	GC09P133414	17.7058	https://www.genecards.org/cgi-bin/carddisp.pl?gene=ADAMTS13
MYLK	Myosin Light Chain Kinase	Protein Coding	Q15746	65	GC03M123610	17.7019	https://www.genecards.org/cgi-bin/carddisp.pl?gene=MYLK
CASR	Calcium Sensing Receptor	Protein Coding	P41180	64	GC03P122183	17.685	https://www.genecards.org/cgi-bin/carddisp.pl?gene=CASR
RNF216	Ring Finger Protein 216	Protein Coding	Q9NWF9	55	GC07M005620	17.6841	https://www.genecards.org/cgi-bin/carddisp.pl?gene=RNF216
RPS6KA3	Ribosomal Protein S6 Kinase A3	Protein Coding	P51812	66	GC0XM020149	17.6821	https://www.genecards.org/cgi-bin/carddisp.pl?gene=RPS6KA3
DEAF1	DEAF1 Transcription Factor	Protein Coding	O75398	52	GC11M000644	17.6663	https://www.genecards.org/cgi-bin/carddisp.pl?gene=DEAF1
FIG4	FIG4 Phosphoinositide 5-Phosphatase	Protein Coding	Q92562	56	GC06P145779	17.6662	https://www.genecards.org/cgi-bin/carddisp.pl?gene=FIG4
MGMT	O-6-Methylguanine-DNA Methyltransferase	Protein Coding	P16455	62	GC10P129467	17.6636	https://www.genecards.org/cgi-bin/carddisp.pl?gene=MGMT
ATP1A1	ATPase Na+/K+ Transporting Subunit Alpha 1	Protein Coding	P05023	63	GC01P116372	17.6589	https://www.genecards.org/cgi-bin/carddisp.pl?gene=ATP1A1
PIGA	Phosphatidylinositol Glycan Anchor Biosynthesis Class A	Protein Coding	P37287	56	GC0XM015319	17.6511	https://www.genecards.org/cgi-bin/carddisp.pl?gene=PIGA
SUOX	Sulfite Oxidase	Protein Coding	P51687	58	GC12P055997	17.6495	https://www.genecards.org/cgi-bin/carddisp.pl?gene=SUOX
BRD4	Bromodomain Containing 4	Protein Coding	O60885	60	GC19M096358	17.6468	https://www.genecards.org/cgi-bin/carddisp.pl?gene=BRD4
CHD2	Chromodomain Helicase DNA Binding Protein 2	Protein Coding	O14647	57	GC15P167327	17.6376	https://www.genecards.org/cgi-bin/carddisp.pl?gene=CHD2
AARS1	Alanyl-TRNA Synthetase 1	Protein Coding	P49588	56	GC16M073536	17.6229	https://www.genecards.org/cgi-bin/carddisp.pl?gene=AARS1
JAK2	Janus Kinase 2	Protein Coding	O60674	66	GC09P004985	17.6174	https://www.genecards.org/cgi-bin/carddisp.pl?gene=JAK2
DPAGT1	Dolichyl-Phosphate N-Acetylglucosaminephosphotransferase 1	Protein Coding	Q9H3H5	56	GC11M130189	17.6162	https://www.genecards.org/cgi-bin/carddisp.pl?gene=DPAGT1
AFF2	ALF Transcription Elongation Factor 2	Protein Coding	P51816	54	GC0XP148500	17.5997	https://www.genecards.org/cgi-bin/carddisp.pl?gene=AFF2
VDR	Vitamin D Receptor	Protein Coding	P11473	62	GC12M047841	17.5968	https://www.genecards.org/cgi-bin/carddisp.pl?gene=VDR
SERAC1	Serine Active Site Containing 1	Protein Coding	Q96JX3	49	GC06M158109	17.5878	https://www.genecards.org/cgi-bin/carddisp.pl?gene=SERAC1
CRBN	Cereblon	Protein Coding	Q96SW2	58	GC03M003144	17.5866	https://www.genecards.org/cgi-bin/carddisp.pl?gene=CRBN
BEX4	Brain Expressed X-Linked 4	Protein Coding	Q9NWD9	36	GC0XP103215	17.5816	https://www.genecards.org/cgi-bin/carddisp.pl?gene=BEX4
SLC25A13	Solute Carrier Family 25 Member 13	Protein Coding	Q9UJS0	58	GC07M096120	17.5611	https://www.genecards.org/cgi-bin/carddisp.pl?gene=SLC25A13
ODC1	Ornithine Decarboxylase 1	Protein Coding	P11926	61	GC02M010432	17.5551	https://www.genecards.org/cgi-bin/carddisp.pl?gene=ODC1
IL17A	Interleukin 17A	Protein Coding	Q16552	56	GC06P052186	17.5518	https://www.genecards.org/cgi-bin/carddisp.pl?gene=IL17A
SMAD2	SMAD Family Member 2	Protein Coding	Q15796	66	GC18M047809	17.551	https://www.genecards.org/cgi-bin/carddisp.pl?gene=SMAD2
MPC1	Mitochondrial Pyruvate Carrier 1	Protein Coding	Q9Y5U8	54	GC06M166364	17.5506	https://www.genecards.org/cgi-bin/carddisp.pl?gene=MPC1
LDLR	Low Density Lipoprotein Receptor	Protein Coding	P01130	64	GC19P122311	17.5325	https://www.genecards.org/cgi-bin/carddisp.pl?gene=LDLR
COQ8A	Coenzyme Q8A	Protein Coding	Q8NI60	56	GC01P226939	17.532	https://www.genecards.org/cgi-bin/carddisp.pl?gene=COQ8A
PNPO	Pyridoxamine 5'-Phosphate Oxidase	Protein Coding	Q9NVS9	59	GC17P047941	17.526	https://www.genecards.org/cgi-bin/carddisp.pl?gene=PNPO
MIAT	Myocardial Infarction Associated Transcript	RNA Gene		35	GC22P026646	17.5242	https://www.genecards.org/cgi-bin/carddisp.pl?gene=MIAT
PRKCA	Protein Kinase C Alpha	Protein Coding	P17252	64	GC17P066302	17.5196	https://www.genecards.org/cgi-bin/carddisp.pl?gene=PRKCA
PDCD1	Programmed Cell Death 1	Protein Coding	Q15116	60	GC02M241849	17.512	https://www.genecards.org/cgi-bin/carddisp.pl?gene=PDCD1
MN1	MN1 Proto-Oncogene, Transcriptional Regulator	Protein Coding	Q10571	54	GC22M027748	17.5103	https://www.genecards.org/cgi-bin/carddisp.pl?gene=MN1
ARID1B	AT-Rich Interaction Domain 1B	Protein Coding	Q8NFD5	56	GC06P156777	17.4941	https://www.genecards.org/cgi-bin/carddisp.pl?gene=ARID1B
GABRB1	Gamma-Aminobutyric Acid Type A Receptor Subunit Beta1	Protein Coding	P18505	60	GC04P046949	17.4771	https://www.genecards.org/cgi-bin/carddisp.pl?gene=GABRB1
MPV17	Mitochondrial Inner Membrane Protein MPV17	Protein Coding	P39210	54	GC02M027309	17.4521	https://www.genecards.org/cgi-bin/carddisp.pl?gene=MPV17
DNAJC5	DnaJ Heat Shock Protein Family (Hsp40) Member C5	Protein Coding	Q9H3Z4	54	GC20P063895	17.4403	https://www.genecards.org/cgi-bin/carddisp.pl?gene=DNAJC5
MMACHC	Metabolism Of Cobalamin Associated C	Protein Coding	Q9Y4U1	55	GC01P045500	17.4248	https://www.genecards.org/cgi-bin/carddisp.pl?gene=MMACHC
ADCY5	Adenylate Cyclase 5	Protein Coding	O95622	60	GC03M123282	17.4089	https://www.genecards.org/cgi-bin/carddisp.pl?gene=ADCY5
NEU1	Neuraminidase 1	Protein Coding	Q99519	59	GC06M031857	17.4022	https://www.genecards.org/cgi-bin/carddisp.pl?gene=NEU1
TBCK	TBC1 Domain Containing Kinase	Protein Coding	Q8TEA7	52	GC04M106041	17.4019	https://www.genecards.org/cgi-bin/carddisp.pl?gene=TBCK
RPGRIP1L	RPGRIP1 Like	Protein Coding	Q68CZ1	55	GC16M053729	17.4011	https://www.genecards.org/cgi-bin/carddisp.pl?gene=RPGRIP1L
PCNT	Pericentrin	Protein Coding	O95613	56	GC21P046324	17.3958	https://www.genecards.org/cgi-bin/carddisp.pl?gene=PCNT
PLAU	Plasminogen Activator, Urokinase	Protein Coding	P00749	64	GC10P073909	17.3837	https://www.genecards.org/cgi-bin/carddisp.pl?gene=PLAU
MOCS1	Molybdenum Cofactor Synthesis 1	Protein Coding	Q9NZB8	54	GC06M039899	17.3806	https://www.genecards.org/cgi-bin/carddisp.pl?gene=MOCS1
DLD	Dihydrolipoamide Dehydrogenase	Protein Coding	P09622	62	GC07P108290	17.379	https://www.genecards.org/cgi-bin/carddisp.pl?gene=DLD
KCTD7	Potassium Channel Tetramerization Domain Containing 7	Protein Coding	Q96MP8	50	GC07P066628	17.3604	https://www.genecards.org/cgi-bin/carddisp.pl?gene=KCTD7
SLC25A1	Solute Carrier Family 25 Member 1	Protein Coding	P53007	58	GC22M020182	17.3493	https://www.genecards.org/cgi-bin/carddisp.pl?gene=SLC25A1
CLCN2	Chloride Voltage-Gated Channel 2	Protein Coding	P51788	57	GC03M184346	17.3468	https://www.genecards.org/cgi-bin/carddisp.pl?gene=CLCN2
KCNMA1	Potassium Calcium-Activated Channel Subfamily M Alpha 1	Protein Coding	Q12791	60	GC10M076869	17.3454	https://www.genecards.org/cgi-bin/carddisp.pl?gene=KCNMA1
USP18	Ubiquitin Specific Peptidase 18	Protein Coding	Q9UMW8	52	GC22P018149	17.342	https://www.genecards.org/cgi-bin/carddisp.pl?gene=USP18
HIP1	Huntingtin Interacting Protein 1	Protein Coding	O00291	55	GC07M075533	17.3381	https://www.genecards.org/cgi-bin/carddisp.pl?gene=HIP1
IFT140	Intraflagellar Transport 140	Protein Coding	Q96RY7	52	GC16M025553	17.3358	https://www.genecards.org/cgi-bin/carddisp.pl?gene=IFT140
KMT2A	Lysine Methyltransferase 2A	Protein Coding	Q03164	60	GC11P118436	17.3316	https://www.genecards.org/cgi-bin/carddisp.pl?gene=KMT2A
SETX	Senataxin	Protein Coding	Q7Z333	54	GC09M132261	17.3313	https://www.genecards.org/cgi-bin/carddisp.pl?gene=SETX
GPSM2	G Protein Signaling Modulator 2	Protein Coding	P81274	54	GC01P108875	17.3308	https://www.genecards.org/cgi-bin/carddisp.pl?gene=GPSM2
SIRT1	Sirtuin 1	Protein Coding	Q96EB6	62	GC10P067884	17.33	https://www.genecards.org/cgi-bin/carddisp.pl?gene=SIRT1
UNC80	Unc-80 Homolog, NALCN Channel Complex Subunit	Protein Coding	Q8N2C7	47	GC02P209771	17.3195	https://www.genecards.org/cgi-bin/carddisp.pl?gene=UNC80
IBA57	Iron-Sulfur Cluster Assembly Factor IBA57	Protein Coding	Q5T440	48	GC01P228165	17.3022	https://www.genecards.org/cgi-bin/carddisp.pl?gene=IBA57
YWHAE	Tyrosine 3-Monooxygenase/Tryptophan 5-Monooxygenase Activation Protein Epsilon	Protein Coding	P62258	63	GC17M083833	17.2935	https://www.genecards.org/cgi-bin/carddisp.pl?gene=YWHAE
HCN2	Hyperpolarization Activated Cyclic Nucleotide Gated Potassium And Sodium Channel 2	Protein Coding	Q9UL51	59	GC19P000589	17.2931	https://www.genecards.org/cgi-bin/carddisp.pl?gene=HCN2
RARS2	Arginyl-TRNA Synthetase 2, Mitochondrial	Protein Coding	Q5T160	55	GC06M097927	17.2809	https://www.genecards.org/cgi-bin/carddisp.pl?gene=RARS2
F7	Coagulation Factor VII	Protein Coding	P08709	61	GC13P113105	17.2763	https://www.genecards.org/cgi-bin/carddisp.pl?gene=F7
ERCC6	ERCC Excision Repair 6, Chromatin Remodeling Factor	Protein Coding	Q03468	58	GC10M049454	17.276	https://www.genecards.org/cgi-bin/carddisp.pl?gene=ERCC6
RAB39B	RAB39B, Member RAS Oncogene Family	Protein Coding	Q96DA2	51	GC0XM155259	17.2693	https://www.genecards.org/cgi-bin/carddisp.pl?gene=RAB39B
GRIA1	Glutamate Ionotropic Receptor AMPA Type Subunit 1	Protein Coding	P42261	63	GC05P153489	17.2529	https://www.genecards.org/cgi-bin/carddisp.pl?gene=GRIA1
SACS	Sacsin Molecular Chaperone	Protein Coding	Q9NZJ4	50	GC13M023288	17.2506	https://www.genecards.org/cgi-bin/carddisp.pl?gene=SACS
SDHC	Succinate Dehydrogenase Complex Subunit C	Protein Coding	Q99643	55	GC01P161314	17.2449	https://www.genecards.org/cgi-bin/carddisp.pl?gene=SDHC
ACADS	Acyl-CoA Dehydrogenase Short Chain	Protein Coding	P16219	58	GC12P134684	17.2294	https://www.genecards.org/cgi-bin/carddisp.pl?gene=ACADS
TNFRSF1A	TNF Receptor Superfamily Member 1A	Protein Coding	P19438	63	GC12M006328	17.2282	https://www.genecards.org/cgi-bin/carddisp.pl?gene=TNFRSF1A
SMO	Smoothened, Frizzled Class Receptor	Protein Coding	Q99835	64	GC07P137052	17.2251	https://www.genecards.org/cgi-bin/carddisp.pl?gene=SMO
STX1B	Syntaxin 1B	Protein Coding	P61266	54	GC16M030989	17.2195	https://www.genecards.org/cgi-bin/carddisp.pl?gene=STX1B
PEX5	Peroxisomal Biogenesis Factor 5	Protein Coding	P50542	57	GC12P042138	17.218	https://www.genecards.org/cgi-bin/carddisp.pl?gene=PEX5
IDUA	Alpha-L-Iduronidase	Protein Coding	P35475	58	GC04P000986	17.2072	https://www.genecards.org/cgi-bin/carddisp.pl?gene=IDUA
PARP1	Poly(ADP-Ribose) Polymerase 1	Protein Coding	P09874	64	GC01M226360	17.2059	https://www.genecards.org/cgi-bin/carddisp.pl?gene=PARP1
KAT5	Lysine Acetyltransferase 5	Protein Coding	Q92993	62	GC11P065711	17.2009	https://www.genecards.org/cgi-bin/carddisp.pl?gene=KAT5
ACTL6B	Actin Like 6B	Protein Coding	O94805	54	GC07M100643	17.1984	https://www.genecards.org/cgi-bin/carddisp.pl?gene=ACTL6B
NCAM1	Neural Cell Adhesion Molecule 1	Protein Coding	P13591	61	GC11P112961	17.1915	https://www.genecards.org/cgi-bin/carddisp.pl?gene=NCAM1
NR3C1	Nuclear Receptor Subfamily 3 Group C Member 1	Protein Coding	P04150	62	GC05M143277	17.1873	https://www.genecards.org/cgi-bin/carddisp.pl?gene=NR3C1
EXOSC3	Exosome Component 3	Protein Coding	Q9NQT5	55	GC09M037772	17.1787	https://www.genecards.org/cgi-bin/carddisp.pl?gene=EXOSC3
INPP5E	Inositol Polyphosphate-5-Phosphatase E	Protein Coding	Q9NRR6	54	GC09M136428	17.1656	https://www.genecards.org/cgi-bin/carddisp.pl?gene=INPP5E
HYCC1	Hyccin PI4KA Lipid Kinase Complex Subunit 1	Protein Coding	Q9BYI3	48	GC07M022893	17.1505	https://www.genecards.org/cgi-bin/carddisp.pl?gene=HYCC1
MAGEL2	MAGE Family Member L2	Protein Coding	Q9UJ55	50	GC15M023643	17.1396	https://www.genecards.org/cgi-bin/carddisp.pl?gene=MAGEL2
CDH5	Cadherin 5	Protein Coding	P33151	59	GC16P066366	17.1098	https://www.genecards.org/cgi-bin/carddisp.pl?gene=CDH5
EPRS1	Glutamyl-Prolyl-TRNA Synthetase 1	Protein Coding	P07814	57	GC01M219969	17.1063	https://www.genecards.org/cgi-bin/carddisp.pl?gene=EPRS1
GJB2	Gap Junction Protein Beta 2	Protein Coding	P29033	58	GC13M020187	17.0947	https://www.genecards.org/cgi-bin/carddisp.pl?gene=GJB2
POLR3A	RNA Polymerase III Subunit A	Protein Coding	O14802	57	GC10M079174	17.0933	https://www.genecards.org/cgi-bin/carddisp.pl?gene=POLR3A
GNE	Glucosamine (UDP-N-Acetyl)-2-Epimerase/N-Acetylmannosamine Kinase	Protein Coding	Q9Y223	55	GC09M036214	17.0911	https://www.genecards.org/cgi-bin/carddisp.pl?gene=GNE
TYMP	Thymidine Phosphorylase	Protein Coding	P19971	60	GC22M050525	17.0905	https://www.genecards.org/cgi-bin/carddisp.pl?gene=TYMP
GABRA2	Gamma-Aminobutyric Acid Type A Receptor Subunit Alpha2	Protein Coding	P47869	59	GC04M046243	17.0903	https://www.genecards.org/cgi-bin/carddisp.pl?gene=GABRA2
C12orf57	Chromosome 12 Open Reading Frame 57	Protein Coding	Q99622	48	GC12P042127	17.0892	https://www.genecards.org/cgi-bin/carddisp.pl?gene=C12orf57
SCO2	Synthesis Of Cytochrome C Oxidase 2	Protein Coding	O43819	57	GC22M050523	17.0879	https://www.genecards.org/cgi-bin/carddisp.pl?gene=SCO2
PSAT1	Phosphoserine Aminotransferase 1	Protein Coding	Q9Y617	59	GC09P078297	17.0877	https://www.genecards.org/cgi-bin/carddisp.pl?gene=PSAT1
PDE4D	Phosphodiesterase 4D	Protein Coding	Q08499	62	GC05M058969	17.0849	https://www.genecards.org/cgi-bin/carddisp.pl?gene=PDE4D
CC2D2A	Coiled-Coil And C2 Domain Containing 2A	Protein Coding	Q9P2K1	52	GC04P025732	17.0808	https://www.genecards.org/cgi-bin/carddisp.pl?gene=CC2D2A
CASP9	Caspase 9	Protein Coding	P55211	60	GC01M015507	17.0742	https://www.genecards.org/cgi-bin/carddisp.pl?gene=CASP9
HUWE1	HECT, UBA And WWE Domain Containing E3 Ubiquitin Protein Ligase 1	Protein Coding	Q7Z6Z7	59	GC0XM053532	17.0696	https://www.genecards.org/cgi-bin/carddisp.pl?gene=HUWE1
SOX9	SRY-Box Transcription Factor 9	Protein Coding	P48436	58	GC17P072121	17.0599	https://www.genecards.org/cgi-bin/carddisp.pl?gene=SOX9
EEF1A2	Eukaryotic Translation Elongation Factor 1 Alpha 2	Protein Coding	Q05639	59	GC20M063488	17.0559	https://www.genecards.org/cgi-bin/carddisp.pl?gene=EEF1A2
RAB3GAP1	RAB3 GTPase Activating Protein Catalytic Subunit 1	Protein Coding	Q15042	53	GC02P135052	17.0551	https://www.genecards.org/cgi-bin/carddisp.pl?gene=RAB3GAP1
EMX2	Empty Spiracles Homeobox 2	Protein Coding	Q04743	56	GC10P117542	17.0525	https://www.genecards.org/cgi-bin/carddisp.pl?gene=EMX2
NARS2	Asparaginyl-TRNA Synthetase 2, Mitochondrial	Protein Coding	Q96I59	55	GC11M078435	17.0513	https://www.genecards.org/cgi-bin/carddisp.pl?gene=NARS2
MIR146B	MicroRNA 146b	RNA Gene		31	GC10P102436	17.0497	https://www.genecards.org/cgi-bin/carddisp.pl?gene=MIR146B
CRYAB	Crystallin Alpha B	Protein Coding	P02511	59	GC11M111908	17.0497	https://www.genecards.org/cgi-bin/carddisp.pl?gene=CRYAB
ZSWIM6	Zinc Finger SWIM-Type Containing 6	Protein Coding	Q9HCJ5	48	GC05P061332	17.0481	https://www.genecards.org/cgi-bin/carddisp.pl?gene=ZSWIM6
PEX26	Peroxisomal Biogenesis Factor 26	Protein Coding	Q7Z412	52	GC22P075339	17.0473	https://www.genecards.org/cgi-bin/carddisp.pl?gene=PEX26
COL1A1	Collagen Type I Alpha 1 Chain	Protein Coding	P02452	63	GC17M085601	17.0425	https://www.genecards.org/cgi-bin/carddisp.pl?gene=COL1A1
NKX6-2	NK6 Homeobox 2	Protein Coding	Q9C056	50	GC10M132783	17.0293	https://www.genecards.org/cgi-bin/carddisp.pl?gene=NKX6-2
GRID2	Glutamate Ionotropic Receptor Delta Type Subunit 2	Protein Coding	O43424	58	GC04P092304	17.019	https://www.genecards.org/cgi-bin/carddisp.pl?gene=GRID2
PLEKHG2	Pleckstrin Homology And RhoGEF Domain Containing G2	Protein Coding	Q9H7P9	50	GC19P039412	17.0065	https://www.genecards.org/cgi-bin/carddisp.pl?gene=PLEKHG2
NECTIN1	Nectin Cell Adhesion Molecule 1	Protein Coding	Q15223	59	GC11M130214	16.9956	https://www.genecards.org/cgi-bin/carddisp.pl?gene=NECTIN1
MLYCD	Malonyl-CoA Decarboxylase	Protein Coding	O95822	55	GC16P083899	16.9921	https://www.genecards.org/cgi-bin/carddisp.pl?gene=MLYCD
GOLGA2	Golgin A2	Protein Coding	Q08379	55	GC09M128255	16.9882	https://www.genecards.org/cgi-bin/carddisp.pl?gene=GOLGA2
SELP	Selectin P	Protein Coding	P16109	59	GC01M169558	16.9802	https://www.genecards.org/cgi-bin/carddisp.pl?gene=SELP
ADAM22	ADAM Metallopeptidase Domain 22	Protein Coding	Q9P0K1	55	GC07P087934	16.9801	https://www.genecards.org/cgi-bin/carddisp.pl?gene=ADAM22
MEIS2	Meis Homeobox 2	Protein Coding	O14770	55	GC15M036889	16.9785	https://www.genecards.org/cgi-bin/carddisp.pl?gene=MEIS2
PEX1	Peroxisomal Biogenesis Factor 1	Protein Coding	O43933	58	GC07M092487	16.9756	https://www.genecards.org/cgi-bin/carddisp.pl?gene=PEX1
TMEM107	Transmembrane Protein 107	Protein Coding	Q6UX40	49	GC17M084193	16.9658	https://www.genecards.org/cgi-bin/carddisp.pl?gene=TMEM107
REN	Renin	Protein Coding	P00797	62	GC01M204154	16.9633	https://www.genecards.org/cgi-bin/carddisp.pl?gene=REN
ASS1	Argininosuccinate Synthase 1	Protein Coding	P00966	62	GC09P130444	16.96	https://www.genecards.org/cgi-bin/carddisp.pl?gene=ASS1
VAMP2	Vesicle Associated Membrane Protein 2	Protein Coding	P63027	58	GC17M084184	16.9554	https://www.genecards.org/cgi-bin/carddisp.pl?gene=VAMP2
GCK	Glucokinase	Protein Coding	P35557	62	GC07M045433	16.9478	https://www.genecards.org/cgi-bin/carddisp.pl?gene=GCK
AMPD2	Adenosine Monophosphate Deaminase 2	Protein Coding	Q01433	58	GC01P109616	16.9438	https://www.genecards.org/cgi-bin/carddisp.pl?gene=AMPD2
RTN4	Reticulon 4	Protein Coding	Q9NQC3	57	GC02M054934	16.9254	https://www.genecards.org/cgi-bin/carddisp.pl?gene=RTN4
CTNND2	Catenin Delta 2	Protein Coding	Q9UQB3	55	GC05M010971	16.9212	https://www.genecards.org/cgi-bin/carddisp.pl?gene=CTNND2
PEX6	Peroxisomal Biogenesis Factor 6	Protein Coding	Q13608	54	GC06M042963	16.8903	https://www.genecards.org/cgi-bin/carddisp.pl?gene=PEX6
IKBKG	Inhibitor Of Nuclear Factor Kappa B Kinase Regulatory Subunit Gamma	Protein Coding	Q9Y6K9	60	GC0XP154541	16.877	https://www.genecards.org/cgi-bin/carddisp.pl?gene=IKBKG
MICU1	Mitochondrial Calcium Uptake 1	Protein Coding	Q9BPX6	55	GC10M072367	16.8701	https://www.genecards.org/cgi-bin/carddisp.pl?gene=MICU1
TRIO	Trio Rho Guanine Nucleotide Exchange Factor	Protein Coding	O75962	57	GC05P014143	16.8671	https://www.genecards.org/cgi-bin/carddisp.pl?gene=TRIO
TFRC	Transferrin Receptor	Protein Coding	P02786	63	GC03M196520	16.8608	https://www.genecards.org/cgi-bin/carddisp.pl?gene=TFRC
PURA	Purine Rich Element Binding Protein A	Protein Coding	Q00577	58	GC05P153562	16.8591	https://www.genecards.org/cgi-bin/carddisp.pl?gene=PURA
ITM2B	Integral Membrane Protein 2B	Protein Coding	Q9Y287	56	GC13P048233	16.8536	https://www.genecards.org/cgi-bin/carddisp.pl?gene=ITM2B
RYR3	Ryanodine Receptor 3	Protein Coding	Q15413	54	GC15P033310	16.8416	https://www.genecards.org/cgi-bin/carddisp.pl?gene=RYR3
MBD5	Methyl-CpG Binding Domain Protein 5	Protein Coding	Q9P267	51	GC02P148027	16.8394	https://www.genecards.org/cgi-bin/carddisp.pl?gene=MBD5
PCCB	Propionyl-CoA Carboxylase Subunit Beta	Protein Coding	P05166	59	GC03P136250	16.8384	https://www.genecards.org/cgi-bin/carddisp.pl?gene=PCCB
ERCC2	ERCC Excision Repair 2, TFIIH Core Complex Helicase Subunit	Protein Coding	P18074	61	GC19M045349	16.827	https://www.genecards.org/cgi-bin/carddisp.pl?gene=ERCC2
PDP1	Pyruvate Dehydrogenase Phosphatase Catalytic Subunit 1	Protein Coding	Q9P0J1	60	GC08P093857	16.8217	https://www.genecards.org/cgi-bin/carddisp.pl?gene=PDP1
TK2	Thymidine Kinase 2	Protein Coding	O00142	54	GC16M066508	16.8179	https://www.genecards.org/cgi-bin/carddisp.pl?gene=TK2
EPB41L1	Erythrocyte Membrane Protein Band 4.1 Like 1	Protein Coding	Q9H4G0	55	GC20P036091	16.8167	https://www.genecards.org/cgi-bin/carddisp.pl?gene=EPB41L1
LAMC3	Laminin Subunit Gamma 3	Protein Coding	Q9Y6N6	55	GC09P131009	16.8101	https://www.genecards.org/cgi-bin/carddisp.pl?gene=LAMC3
BSX	Brain Specific Homeobox	Protein Coding	Q3C1V8	42	GC11M122977	16.8062	https://www.genecards.org/cgi-bin/carddisp.pl?gene=BSX
DLAT	Dihydrolipoamide S-Acetyltransferase	Protein Coding	P10515	59	GC11P112608	16.7947	https://www.genecards.org/cgi-bin/carddisp.pl?gene=DLAT
BCAP31	B Cell Receptor Associated Protein 31	Protein Coding	P51572	54	GC0XM153701	16.7929	https://www.genecards.org/cgi-bin/carddisp.pl?gene=BCAP31
VARS1	Valyl-TRNA Synthetase 1	Protein Coding	P26640	56	GC06M097124	16.79	https://www.genecards.org/cgi-bin/carddisp.pl?gene=VARS1
RARS1	Arginyl-TRNA Synthetase 1	Protein Coding	P54136	57	GC05P168487	16.7839	https://www.genecards.org/cgi-bin/carddisp.pl?gene=RARS1
CRB2	Crumbs Cell Polarity Complex Component 2	Protein Coding	Q5IJ48	54	GC09P127065	16.773	https://www.genecards.org/cgi-bin/carddisp.pl?gene=CRB2
KCNQ3	Potassium Voltage-Gated Channel Subfamily Q Member 3	Protein Coding	O43525	59	GC08M132120	16.7713	https://www.genecards.org/cgi-bin/carddisp.pl?gene=KCNQ3
AHI1	Abelson Helper Integration Site 1	Protein Coding	Q8N157	54	GC06M135283	16.7701	https://www.genecards.org/cgi-bin/carddisp.pl?gene=AHI1
RNASET2	Ribonuclease T2	Protein Coding	O00584	57	GC06M166924	16.7681	https://www.genecards.org/cgi-bin/carddisp.pl?gene=RNASET2
PIGV	Phosphatidylinositol Glycan Anchor Biosynthesis Class V	Protein Coding	Q9NUD9	52	GC01P026787	16.7641	https://www.genecards.org/cgi-bin/carddisp.pl?gene=PIGV
BTD	Biotinidase	Protein Coding	P43251	58	GC03P022930	16.7438	https://www.genecards.org/cgi-bin/carddisp.pl?gene=BTD
CALM2	Calmodulin 2	Protein Coding	P0DP24	56	GC02M047160	16.7236	https://www.genecards.org/cgi-bin/carddisp.pl?gene=CALM2
ST3GAL3	ST3 Beta-Galactoside Alpha-2,3-Sialyltransferase 3	Protein Coding	Q11203	58	GC01P043705	16.7196	https://www.genecards.org/cgi-bin/carddisp.pl?gene=ST3GAL3
CLU	Clusterin	Protein Coding	P10909	60	GC08M027596	16.7163	https://www.genecards.org/cgi-bin/carddisp.pl?gene=CLU
SLC9A1	Solute Carrier Family 9 Member A1	Protein Coding	P19634	63	GC01M031724	16.7161	https://www.genecards.org/cgi-bin/carddisp.pl?gene=SLC9A1
CSNK2A1	Casein Kinase 2 Alpha 1	Protein Coding	P68400	63	GC20M000472	16.7125	https://www.genecards.org/cgi-bin/carddisp.pl?gene=CSNK2A1
NPY	Neuropeptide Y	Protein Coding	P01303	58	GC07P024293	16.7019	https://www.genecards.org/cgi-bin/carddisp.pl?gene=NPY
PCCA	Propionyl-CoA Carboxylase Subunit Alpha	Protein Coding	P05165	60	GC13P100089	16.697	https://www.genecards.org/cgi-bin/carddisp.pl?gene=PCCA
HFE	Homeostatic Iron Regulator	Protein Coding	Q30201	58	GC06P026087	16.6813	https://www.genecards.org/cgi-bin/carddisp.pl?gene=HFE
TBK1	TANK Binding Kinase 1	Protein Coding	Q9UHD2	62	GC12P064451	16.6778	https://www.genecards.org/cgi-bin/carddisp.pl?gene=TBK1
HERC2	HECT And RLD Domain Containing E3 Ubiquitin Protein Ligase 2	Protein Coding	O95714	57	GC15M028111	16.6776	https://www.genecards.org/cgi-bin/carddisp.pl?gene=HERC2
EIF2AK3	Eukaryotic Translation Initiation Factor 2 Alpha Kinase 3	Protein Coding	Q9NZJ5	63	GC02M088556	16.6734	https://www.genecards.org/cgi-bin/carddisp.pl?gene=EIF2AK3
QDPR	Quinoid Dihydropteridine Reductase	Protein Coding	P09417	59	GC04M017460	16.6689	https://www.genecards.org/cgi-bin/carddisp.pl?gene=QDPR
EARS2	Glutamyl-TRNA Synthetase 2, Mitochondrial	Protein Coding	Q5JPH6	54	GC16M026438	16.6586	https://www.genecards.org/cgi-bin/carddisp.pl?gene=EARS2
SILC1	Sciatic Injury Induced LincRNA Upregulator Of SOX11	RNA Gene		22	GC02P005933	16.6533	https://www.genecards.org/cgi-bin/carddisp.pl?gene=SILC1
ERCC1	ERCC Excision Repair 1, Endonuclease Non-Catalytic Subunit	Protein Coding	P07992	59	GC19M097024	16.6502	https://www.genecards.org/cgi-bin/carddisp.pl?gene=ERCC1
NDST1	N-Deacetylase And N-Sulfotransferase 1	Protein Coding	P52848	56	GC05P153796	16.638	https://www.genecards.org/cgi-bin/carddisp.pl?gene=NDST1
PEX2	Peroxisomal Biogenesis Factor 2	Protein Coding	P28328	57	GC08M076980	16.6376	https://www.genecards.org/cgi-bin/carddisp.pl?gene=PEX2
PACS2	Phosphofurin Acidic Cluster Sorting Protein 2	Protein Coding	Q86VP3	52	GC14P105300	16.6332	https://www.genecards.org/cgi-bin/carddisp.pl?gene=PACS2
MAPK14	Mitogen-Activated Protein Kinase 14	Protein Coding	Q16539	64	GC06P144902	16.6271	https://www.genecards.org/cgi-bin/carddisp.pl?gene=MAPK14
EOMES	Eomesodermin	Protein Coding	O95936	56	GC03M027715	16.6253	https://www.genecards.org/cgi-bin/carddisp.pl?gene=EOMES
CD274	CD274 Molecule	Protein Coding	Q9NZQ7	58	GC09P005450	16.6242	https://www.genecards.org/cgi-bin/carddisp.pl?gene=CD274
FARSB	Phenylalanyl-TRNA Synthetase Subunit Beta	Protein Coding	Q9NSD9	55	GC02M222570	16.6219	https://www.genecards.org/cgi-bin/carddisp.pl?gene=FARSB
MKS1	MKS Transition Zone Complex Subunit 1	Protein Coding	Q9NXB0	52	GC17M058205	16.6198	https://www.genecards.org/cgi-bin/carddisp.pl?gene=MKS1
CHI3L1	Chitinase 3 Like 1	Protein Coding	P36222	58	GC01M203148	16.6175	https://www.genecards.org/cgi-bin/carddisp.pl?gene=CHI3L1
RTN4IP1	Reticulon 4 Interacting Protein 1	Protein Coding	Q8WWV3	51	GC06M106571	16.6162	https://www.genecards.org/cgi-bin/carddisp.pl?gene=RTN4IP1
C3	Complement C3	Protein Coding	P01024	62	GC19M006677	16.6121	https://www.genecards.org/cgi-bin/carddisp.pl?gene=C3
AMT	Aminomethyltransferase	Protein Coding	P48728	56	GC03M054009	16.6104	https://www.genecards.org/cgi-bin/carddisp.pl?gene=AMT
KIT	KIT Proto-Oncogene, Receptor Tyrosine Kinase	Protein Coding	P10721	66	GC04P054657	16.6034	https://www.genecards.org/cgi-bin/carddisp.pl?gene=KIT
WASF1	WASP Family Member 1	Protein Coding	Q92558	58	GC06M110099	16.5985	https://www.genecards.org/cgi-bin/carddisp.pl?gene=WASF1
CYP27B1	Cytochrome P450 Family 27 Subfamily B Member 1	Protein Coding	O15528	59	GC12M059652	16.5935	https://www.genecards.org/cgi-bin/carddisp.pl?gene=CYP27B1
ACOX1	Acyl-CoA Oxidase 1	Protein Coding	Q15067	59	GC17M075941	16.5799	https://www.genecards.org/cgi-bin/carddisp.pl?gene=ACOX1
PECAM1	Platelet And Endothelial Cell Adhesion Molecule 1	Protein Coding	P16284	53	GC17M064319	16.5733	https://www.genecards.org/cgi-bin/carddisp.pl?gene=PECAM1
GCSH	Glycine Cleavage System Protein H	Protein Coding	P23434	55	GC16M081081	16.5672	https://www.genecards.org/cgi-bin/carddisp.pl?gene=GCSH
GATAD2B	GATA Zinc Finger Domain Containing 2B	Protein Coding	Q8WXI9	55	GC01M163906	16.5628	https://www.genecards.org/cgi-bin/carddisp.pl?gene=GATAD2B
SPP1	Secreted Phosphoprotein 1	Protein Coding	P10451	57	GC04P087975	16.5617	https://www.genecards.org/cgi-bin/carddisp.pl?gene=SPP1
MAF	MAF BZIP Transcription Factor	Protein Coding	O75444	58	GC16M079204	16.5579	https://www.genecards.org/cgi-bin/carddisp.pl?gene=MAF
KANK1	KN Motif And Ankyrin Repeat Domains 1	Protein Coding	Q14678	55	GC09P000474	16.5541	https://www.genecards.org/cgi-bin/carddisp.pl?gene=KANK1
YWHAG	Tyrosine 3-Monooxygenase/Tryptophan 5-Monooxygenase Activation Protein Gamma	Protein Coding	P61981	61	GC07M078801	16.5384	https://www.genecards.org/cgi-bin/carddisp.pl?gene=YWHAG
ABCC1	ATP Binding Cassette Subfamily C Member 1 (ABCC1 Blood Group)	Protein Coding	P33527	61	GC16P015949	16.5369	https://www.genecards.org/cgi-bin/carddisp.pl?gene=ABCC1
FGF23	Fibroblast Growth Factor 23	Protein Coding	Q9GZV9	59	GC12M004368	16.5363	https://www.genecards.org/cgi-bin/carddisp.pl?gene=FGF23
HSD17B4	Hydroxysteroid 17-Beta Dehydrogenase 4	Protein Coding	P51659	59	GC05P119452	16.5301	https://www.genecards.org/cgi-bin/carddisp.pl?gene=HSD17B4
PVT1	Pvt1 Oncogene	RNA Gene		35	GC08P128175	16.5209	https://www.genecards.org/cgi-bin/carddisp.pl?gene=PVT1
MAST1	Microtubule Associated Serine/Threonine Kinase 1	Protein Coding	Q9Y2H9	53	GC19P122444	16.5196	https://www.genecards.org/cgi-bin/carddisp.pl?gene=MAST1
HESX1	HESX Homeobox 1	Protein Coding	Q9UBX0	51	GC03M057207	16.5165	https://www.genecards.org/cgi-bin/carddisp.pl?gene=HESX1
VPS13B	Vacuolar Protein Sorting 13 Homolog B	Protein Coding	Q7Z7G8	53	GC08P099075	16.5146	https://www.genecards.org/cgi-bin/carddisp.pl?gene=VPS13B
TSPO	Translocator Protein	Protein Coding	B1AH88	58	GC22P043151	16.4944	https://www.genecards.org/cgi-bin/carddisp.pl?gene=TSPO
PODXL	Podocalyxin Like	Protein Coding	O00592	56	GC07M131500	16.4906	https://www.genecards.org/cgi-bin/carddisp.pl?gene=PODXL
CPT1A	Carnitine Palmitoyltransferase 1A	Protein Coding	P50416	62	GC11M068754	16.4769	https://www.genecards.org/cgi-bin/carddisp.pl?gene=CPT1A
CXCL12	C-X-C Motif Chemokine Ligand 12	Protein Coding	P48061	59	GC10M044370	16.4759	https://www.genecards.org/cgi-bin/carddisp.pl?gene=CXCL12
RPS27A	Ribosomal Protein S27a	Protein Coding	P62979	55	GC02P055231	16.4714	https://www.genecards.org/cgi-bin/carddisp.pl?gene=RPS27A
MFSD8	Major Facilitator Superfamily Domain Containing 8	Protein Coding	Q8NHS3	49	GC04M127917	16.464	https://www.genecards.org/cgi-bin/carddisp.pl?gene=MFSD8
AUTS2	Activator Of Transcription And Developmental Regulator AUTS2	Protein Coding	Q8WXX7	54	GC07P069598	16.4622	https://www.genecards.org/cgi-bin/carddisp.pl?gene=AUTS2
SLC13A5	Solute Carrier Family 13 Member 5	Protein Coding	Q86YT5	55	GC17M006684	16.4618	https://www.genecards.org/cgi-bin/carddisp.pl?gene=SLC13A5
KCNJ11	Potassium Inwardly Rectifying Channel Subfamily J Member 11	Protein Coding	Q14654	59	GC11M017988	16.4562	https://www.genecards.org/cgi-bin/carddisp.pl?gene=KCNJ11
AP3B2	Adaptor Related Protein Complex 3 Subunit Beta 2	Protein Coding	Q13367	54	GC15M152088	16.4526	https://www.genecards.org/cgi-bin/carddisp.pl?gene=AP3B2
PRTN3	Proteinase 3	Protein Coding	P24158	59	GC19P000840	16.452	https://www.genecards.org/cgi-bin/carddisp.pl?gene=PRTN3
CPS1	Carbamoyl-Phosphate Synthase 1	Protein Coding	P31327	62	GC02P210477	16.4381	https://www.genecards.org/cgi-bin/carddisp.pl?gene=CPS1
NRXN2	Neurexin 2	Protein Coding	Q9P2S2	52	GC11M128954	16.4362	https://www.genecards.org/cgi-bin/carddisp.pl?gene=NRXN2
GRIN2D	Glutamate Ionotropic Receptor NMDA Type Subunit 2D	Protein Coding	O15399	62	GC19P123371	16.4245	https://www.genecards.org/cgi-bin/carddisp.pl?gene=GRIN2D
TAT	Tyrosine Aminotransferase	Protein Coding	P17735	58	GC16M071565	16.4152	https://www.genecards.org/cgi-bin/carddisp.pl?gene=TAT
HOTAIR	HOX Transcript Antisense RNA	RNA Gene		32	GC12M053962	16.413	https://www.genecards.org/cgi-bin/carddisp.pl?gene=HOTAIR
NHLRC1	NHL Repeat Containing E3 Ubiquitin Protein Ligase 1	Protein Coding	Q6VVB1	52	GC06M018120	16.4124	https://www.genecards.org/cgi-bin/carddisp.pl?gene=NHLRC1
ATP8A2	ATPase Phospholipid Transporting 8A2	Protein Coding	Q9NTI2	52	GC13P027246	16.4123	https://www.genecards.org/cgi-bin/carddisp.pl?gene=ATP8A2
LMNB2	Lamin B2	Protein Coding	Q03252	55	GC19M095861	16.4054	https://www.genecards.org/cgi-bin/carddisp.pl?gene=LMNB2
KCND3	Potassium Voltage-Gated Channel Subfamily D Member 3	Protein Coding	Q9UK17	59	GC01M111770	16.404	https://www.genecards.org/cgi-bin/carddisp.pl?gene=KCND3
ABL1	ABL Proto-Oncogene 1, Non-Receptor Tyrosine Kinase	Protein Coding	P00519	66	GC09P130713	16.4015	https://www.genecards.org/cgi-bin/carddisp.pl?gene=ABL1
TSPAN7	Tetraspanin 7	Protein Coding	P41732	58	GC0XP038561	16.3983	https://www.genecards.org/cgi-bin/carddisp.pl?gene=TSPAN7
VIM	Vimentin	Protein Coding	P08670	64	GC10P017227	16.39	https://www.genecards.org/cgi-bin/carddisp.pl?gene=VIM
RTN4R	Reticulon 4 Receptor	Protein Coding	Q9BZR6	58	GC22M020241	16.3845	https://www.genecards.org/cgi-bin/carddisp.pl?gene=RTN4R
PYGB	Glycogen Phosphorylase B	Protein Coding	P11216	55	GC20P025248	16.3811	https://www.genecards.org/cgi-bin/carddisp.pl?gene=PYGB
SYN1	Synapsin I	Protein Coding	P17600	58	GC0XM047571	16.3802	https://www.genecards.org/cgi-bin/carddisp.pl?gene=SYN1
NGFR	Nerve Growth Factor Receptor	Protein Coding	P08138	60	GC17P049495	16.3787	https://www.genecards.org/cgi-bin/carddisp.pl?gene=NGFR
SLC6A17	Solute Carrier Family 6 Member 17	Protein Coding	Q9H1V8	54	GC01P110150	16.3767	https://www.genecards.org/cgi-bin/carddisp.pl?gene=SLC6A17
PWAR1	Prader Willi/Angelman Region RNA 1	RNA Gene		22	GC15P025135	16.3666	https://www.genecards.org/cgi-bin/carddisp.pl?gene=PWAR1
MT-CYB	Mitochondrially Encoded Cytochrome B	Protein Coding	P00156	43	GCMTP014749	16.3646	https://www.genecards.org/cgi-bin/carddisp.pl?gene=MT-CYB
SARS1	Seryl-TRNA Synthetase 1	Protein Coding	P49591	56	GC01P109442	16.3356	https://www.genecards.org/cgi-bin/carddisp.pl?gene=SARS1
NDN	Necdin, MAGE Family Member	Protein Coding	Q99608	55	GC15M027657	16.3306	https://www.genecards.org/cgi-bin/carddisp.pl?gene=NDN
DPYD	Dihydropyrimidine Dehydrogenase	Protein Coding	Q12882	65	GC01M097015	16.3231	https://www.genecards.org/cgi-bin/carddisp.pl?gene=DPYD
NLGN3	Neuroligin 3	Protein Coding	Q9NZ94	56	GC0XP071144	16.3192	https://www.genecards.org/cgi-bin/carddisp.pl?gene=NLGN3
GBE1	1,4-Alpha-Glucan Branching Enzyme 1	Protein Coding	Q04446	56	GC03M081489	16.3127	https://www.genecards.org/cgi-bin/carddisp.pl?gene=GBE1
NDP	Norrin Cystine Knot Growth Factor NDP	Protein Coding	Q00604	54	GC0XM043948	16.2771	https://www.genecards.org/cgi-bin/carddisp.pl?gene=NDP
CACNA2D2	Calcium Voltage-Gated Channel Auxiliary Subunit Alpha2delta 2	Protein Coding	Q9NY47	55	GC03M054104	16.2753	https://www.genecards.org/cgi-bin/carddisp.pl?gene=CACNA2D2
TF	Transferrin	Protein Coding	P02787	64	GC03P140082	16.2579	https://www.genecards.org/cgi-bin/carddisp.pl?gene=TF
SCN5A	Sodium Voltage-Gated Channel Alpha Subunit 5	Protein Coding	Q14524	63	GC03M038742	16.2559	https://www.genecards.org/cgi-bin/carddisp.pl?gene=SCN5A
ANXA11	Annexin A11	Protein Coding	P50995	55	GC10M080150	16.2531	https://www.genecards.org/cgi-bin/carddisp.pl?gene=ANXA11
PEX10	Peroxisomal Biogenesis Factor 10	Protein Coding	O60683	54	GC01M002403	16.2506	https://www.genecards.org/cgi-bin/carddisp.pl?gene=PEX10
ADD3	Adducin 3	Protein Coding	Q9UEY8	55	GC10P109996	16.2375	https://www.genecards.org/cgi-bin/carddisp.pl?gene=ADD3
FAT4	FAT Atypical Cadherin 4	Protein Coding	Q6V0I7	51	GC04P125315	16.2374	https://www.genecards.org/cgi-bin/carddisp.pl?gene=FAT4
CLN8	CLN8 Transmembrane ER And ERGIC Protein	Protein Coding	Q9UBY8	52	GC08P001755	16.2215	https://www.genecards.org/cgi-bin/carddisp.pl?gene=CLN8
MYT1L	Myelin Transcription Factor 1 Like	Protein Coding	Q9UL68	55	GC02M001789	16.2162	https://www.genecards.org/cgi-bin/carddisp.pl?gene=MYT1L
VRK1	VRK Serine/Threonine Kinase 1	Protein Coding	Q99986	60	GC14P096797	16.2158	https://www.genecards.org/cgi-bin/carddisp.pl?gene=VRK1
ETHE1	ETHE1 Persulfide Dioxygenase	Protein Coding	O95571	55	GC19M043506	16.2105	https://www.genecards.org/cgi-bin/carddisp.pl?gene=ETHE1
CSF2	Colony Stimulating Factor 2	Protein Coding	P04141	58	GC05P132073	16.2062	https://www.genecards.org/cgi-bin/carddisp.pl?gene=CSF2
FASN	Fatty Acid Synthase	Protein Coding	P49327	62	GC17M082078	16.2031	https://www.genecards.org/cgi-bin/carddisp.pl?gene=FASN
MIR210	MicroRNA 210	RNA Gene		30	GC11M012505	16.1906	https://www.genecards.org/cgi-bin/carddisp.pl?gene=MIR210
SEPSECS	Sep (O-Phosphoserine) TRNA:Sec (Selenocysteine) TRNA Synthase	Protein Coding	Q9HD40	56	GC04M025121	16.1896	https://www.genecards.org/cgi-bin/carddisp.pl?gene=SEPSECS
ALG13	ALG13 UDP-N-Acetylglucosaminyltransferase Subunit	Protein Coding	Q9NP73	51	GC0XP111665	16.1894	https://www.genecards.org/cgi-bin/carddisp.pl?gene=ALG13
ATXN2	Ataxin 2	Protein Coding	Q99700	56	GC12M111443	16.188	https://www.genecards.org/cgi-bin/carddisp.pl?gene=ATXN2
GRIA2	Glutamate Ionotropic Receptor AMPA Type Subunit 2	Protein Coding	P42262	64	GC04P157204	16.1867	https://www.genecards.org/cgi-bin/carddisp.pl?gene=GRIA2
SNCB	Synuclein Beta	Protein Coding	Q16143	57	GC05M176620	16.1841	https://www.genecards.org/cgi-bin/carddisp.pl?gene=SNCB
SCN11A	Sodium Voltage-Gated Channel Alpha Subunit 11	Protein Coding	Q9UI33	56	GC03M038862	16.1826	https://www.genecards.org/cgi-bin/carddisp.pl?gene=SCN11A
IL1RAPL1	Interleukin 1 Receptor Accessory Protein Like 1	Protein Coding	Q9NZN1	57	GC0XP028605	16.18	https://www.genecards.org/cgi-bin/carddisp.pl?gene=IL1RAPL1
CACNB4	Calcium Voltage-Gated Channel Auxiliary Subunit Beta 4	Protein Coding	O00305	58	GC02M151832	16.1788	https://www.genecards.org/cgi-bin/carddisp.pl?gene=CACNB4
WT1	WT1 Transcription Factor	Protein Coding	P19544	61	GC11M032365	16.1734	https://www.genecards.org/cgi-bin/carddisp.pl?gene=WT1
WDFY3	WD Repeat And FYVE Domain Containing 3	Protein Coding	Q8IZQ1	52	GC04M084766	16.1731	https://www.genecards.org/cgi-bin/carddisp.pl?gene=WDFY3
TSEN2	TRNA Splicing Endonuclease Subunit 2	Protein Coding	Q8NCE0	54	GC03P022834	16.1684	https://www.genecards.org/cgi-bin/carddisp.pl?gene=TSEN2
HIBCH	3-Hydroxyisobutyryl-CoA Hydrolase	Protein Coding	Q6NVY1	54	GC02M190189	16.164	https://www.genecards.org/cgi-bin/carddisp.pl?gene=HIBCH
PEX19	Peroxisomal Biogenesis Factor 19	Protein Coding	P40855	56	GC01M160276	16.1598	https://www.genecards.org/cgi-bin/carddisp.pl?gene=PEX19
MIR223	MicroRNA 223	RNA Gene		30	GC0XP066018	16.1535	https://www.genecards.org/cgi-bin/carddisp.pl?gene=MIR223
PIK3CD	Phosphatidylinositol-4,5-Bisphosphate 3-Kinase Catalytic Subunit Delta	Protein Coding	O00329	66	GC01P051042	16.1525	https://www.genecards.org/cgi-bin/carddisp.pl?gene=PIK3CD
ACOT7	Acyl-CoA Thioesterase 7	Protein Coding	O00154	52	GC01M015148	16.1494	https://www.genecards.org/cgi-bin/carddisp.pl?gene=ACOT7
AIP	Aryl Hydrocarbon Receptor Interacting Protein	Protein Coding	O00170	55	GC11P067468	16.1356	https://www.genecards.org/cgi-bin/carddisp.pl?gene=AIP
SERPINC1	Serpin Family C Member 1	Protein Coding	P01008	63	GC01M175000	16.1253	https://www.genecards.org/cgi-bin/carddisp.pl?gene=SERPINC1
BCL11B	BCL11 Transcription Factor B	Protein Coding	Q9C0K0	55	GC14M099169	16.1243	https://www.genecards.org/cgi-bin/carddisp.pl?gene=BCL11B
NRROS	Negative Regulator Of Reactive Oxygen Species	Protein Coding	Q86YC3	45	GC03P196639	16.1171	https://www.genecards.org/cgi-bin/carddisp.pl?gene=NRROS
CNNM2	Cyclin And CBS Domain Divalent Metal Cation Transport Mediator 2	Protein Coding	Q9H8M5	52	GC10P102918	16.1046	https://www.genecards.org/cgi-bin/carddisp.pl?gene=CNNM2
DCC	DCC Netrin 1 Receptor	Protein Coding	P43146	59	GC18P052340	16.1037	https://www.genecards.org/cgi-bin/carddisp.pl?gene=DCC
XRCC1	X-Ray Repair Cross Complementing 1	Protein Coding	P18887	58	GC19M043543	16.1021	https://www.genecards.org/cgi-bin/carddisp.pl?gene=XRCC1
AMACR	Alpha-Methylacyl-CoA Racemase	Protein Coding	Q9UHK6	58	GC05M033986	16.0903	https://www.genecards.org/cgi-bin/carddisp.pl?gene=AMACR
PQBP1	Polyglutamine Binding Protein 1	Protein Coding	O60828	51	GC0XP048890	16.0882	https://www.genecards.org/cgi-bin/carddisp.pl?gene=PQBP1
PAX2	Paired Box 2	Protein Coding	Q02962	59	GC10P100735	16.0834	https://www.genecards.org/cgi-bin/carddisp.pl?gene=PAX2
POLG2	DNA Polymerase Gamma 2, Accessory Subunit	Protein Coding	Q9UHN1	52	GC17M064477	16.0759	https://www.genecards.org/cgi-bin/carddisp.pl?gene=POLG2
ATP5F1A	ATP Synthase F1 Subunit Alpha	Protein Coding	P25705	59	GC18M046081	16.0752	https://www.genecards.org/cgi-bin/carddisp.pl?gene=ATP5F1A
FRRS1L	Ferric Chelate Reductase 1 Like	Protein Coding	Q9P0K9	47	GC09M109130	16.0682	https://www.genecards.org/cgi-bin/carddisp.pl?gene=FRRS1L
SNX14	Sorting Nexin 14	Protein Coding	Q9Y5W7	50	GC06M097878	16.0671	https://www.genecards.org/cgi-bin/carddisp.pl?gene=SNX14
ABCA1	ATP Binding Cassette Subfamily A Member 1	Protein Coding	O95477	62	GC09M104781	16.0605	https://www.genecards.org/cgi-bin/carddisp.pl?gene=ABCA1
NSDHL	NAD(P) Dependent Steroid Dehydrogenase-Like	Protein Coding	Q15738	58	GC0XP152830	16.055	https://www.genecards.org/cgi-bin/carddisp.pl?gene=NSDHL
ITGB3	Integrin Subunit Beta 3	Protein Coding	P05106	65	GC17P123264	16.0539	https://www.genecards.org/cgi-bin/carddisp.pl?gene=ITGB3
NAGS	N-Acetylglutamate Synthase	Protein Coding	Q8N159	53	GC17P044004	16.0516	https://www.genecards.org/cgi-bin/carddisp.pl?gene=NAGS
GFM1	G Elongation Factor Mitochondrial 1	Protein Coding	Q96RP9	56	GC03P158644	16.0475	https://www.genecards.org/cgi-bin/carddisp.pl?gene=GFM1
CHRNB2	Cholinergic Receptor Nicotinic Beta 2 Subunit	Protein Coding	P17787	58	GC01P167218	16.0437	https://www.genecards.org/cgi-bin/carddisp.pl?gene=CHRNB2
FASLG	Fas Ligand	Protein Coding	P48023	61	GC01P172659	16.0384	https://www.genecards.org/cgi-bin/carddisp.pl?gene=FASLG
GLI3	GLI Family Zinc Finger 3	Protein Coding	P10071	62	GC07M041960	16.0379	https://www.genecards.org/cgi-bin/carddisp.pl?gene=GLI3
STAT1	Signal Transducer And Activator Of Transcription 1	Protein Coding	P42224	66	GC02M190908	16.0292	https://www.genecards.org/cgi-bin/carddisp.pl?gene=STAT1
DPM1	Dolichyl-Phosphate Mannosyltransferase Subunit 1, Catalytic	Protein Coding	O60762	56	GC20M050934	16.0271	https://www.genecards.org/cgi-bin/carddisp.pl?gene=DPM1
IDS	Iduronate 2-Sulfatase	Protein Coding	P22304	60	GC0XM149476	16.0256	https://www.genecards.org/cgi-bin/carddisp.pl?gene=IDS
CCM2	CCM2 Scaffold Protein	Protein Coding	Q9BSQ5	54	GC07P044999	16.0243	https://www.genecards.org/cgi-bin/carddisp.pl?gene=CCM2
BRCA1	BRCA1 DNA Repair Associated	Protein Coding	P38398	63	GC17M043044	16.0214	https://www.genecards.org/cgi-bin/carddisp.pl?gene=BRCA1
PMPCA	Peptidase, Mitochondrial Processing Subunit Alpha	Protein Coding	Q10713	56	GC09P136410	16.0098	https://www.genecards.org/cgi-bin/carddisp.pl?gene=PMPCA
PEX16	Peroxisomal Biogenesis Factor 16	Protein Coding	Q9Y5Y5	51	GC11M128589	16.0087	https://www.genecards.org/cgi-bin/carddisp.pl?gene=PEX16
CCR2	C-C Motif Chemokine Receptor 2	Protein Coding	P41597	58	GC03P059719	16.0054	https://www.genecards.org/cgi-bin/carddisp.pl?gene=CCR2
SPARC	Secreted Protein Acidic And Cysteine Rich	Protein Coding	P09486	62	GC05M151661	15.9995	https://www.genecards.org/cgi-bin/carddisp.pl?gene=SPARC
DIP2B	Disco Interacting Protein 2 Homolog B	Protein Coding	Q9P265	50	GC12P050504	15.9976	https://www.genecards.org/cgi-bin/carddisp.pl?gene=DIP2B
MT-ND1	Mitochondrially Encoded NADH:Ubiquinone Oxidoreductase Core Subunit 1	Protein Coding	P03886	45	GCMTP003309	15.9954	https://www.genecards.org/cgi-bin/carddisp.pl?gene=MT-ND1
PEX7	Peroxisomal Biogenesis Factor 7	Protein Coding	O00628	56	GC06P136822	15.9836	https://www.genecards.org/cgi-bin/carddisp.pl?gene=PEX7
PPP1R15B	Protein Phosphatase 1 Regulatory Subunit 15B	Protein Coding	Q5SWA1	50	GC01M204688	15.9708	https://www.genecards.org/cgi-bin/carddisp.pl?gene=PPP1R15B
ACY1	Aminoacylase 1	Protein Coding	Q03154	58	GC03P051983	15.9693	https://www.genecards.org/cgi-bin/carddisp.pl?gene=ACY1
SIK1	Salt Inducible Kinase 1	Protein Coding	P57059	58	GC21M043414	15.9683	https://www.genecards.org/cgi-bin/carddisp.pl?gene=SIK1
FGB	Fibrinogen Beta Chain	Protein Coding	P02675	59	GC04P154693	15.9658	https://www.genecards.org/cgi-bin/carddisp.pl?gene=FGB
MIR146A	MicroRNA 146a	RNA Gene		31	GC05P160485	15.9593	https://www.genecards.org/cgi-bin/carddisp.pl?gene=MIR146A
PPP2R5D	Protein Phosphatase 2 Regulatory Subunit B'Delta	Protein Coding	Q14738	59	GC06P144964	15.9411	https://www.genecards.org/cgi-bin/carddisp.pl?gene=PPP2R5D
NLGN4X	Neuroligin 4 X-Linked	Protein Coding	Q8N0W4	56	GC0XM005840	15.9362	https://www.genecards.org/cgi-bin/carddisp.pl?gene=NLGN4X
AUH	AU RNA Binding Methylglutaconyl-CoA Hydratase	Protein Coding	Q13825	55	GC09M091213	15.9361	https://www.genecards.org/cgi-bin/carddisp.pl?gene=AUH
ERCC8	ERCC Excision Repair 8, CSA Ubiquitin Ligase Complex Subunit	Protein Coding	Q13216	55	GC05M060915	15.9346	https://www.genecards.org/cgi-bin/carddisp.pl?gene=ERCC8
TRPV4	Transient Receptor Potential Cation Channel Subfamily V Member 4	Protein Coding	Q9HBA0	60	GC12M109783	15.9282	https://www.genecards.org/cgi-bin/carddisp.pl?gene=TRPV4
NDUFV2	NADH:Ubiquinone Oxidoreductase Core Subunit V2	Protein Coding	P19404	55	GC18P009109	15.928	https://www.genecards.org/cgi-bin/carddisp.pl?gene=NDUFV2
DCAF17	DDB1 And CUL4 Associated Factor 17	Protein Coding	Q5H9S7	51	GC02P171434	15.9274	https://www.genecards.org/cgi-bin/carddisp.pl?gene=DCAF17
SUCLA2	Succinate-CoA Ligase ADP-Forming Subunit Beta	Protein Coding	Q9P2R7	59	GC13M047745	15.9234	https://www.genecards.org/cgi-bin/carddisp.pl?gene=SUCLA2
SOD2	Superoxide Dismutase 2	Protein Coding	P04179	60	GC06M159669	15.9184	https://www.genecards.org/cgi-bin/carddisp.pl?gene=SOD2
NTN1	Netrin 1	Protein Coding	O95631	59	GC17P121997	15.9125	https://www.genecards.org/cgi-bin/carddisp.pl?gene=NTN1
TSEN15	TRNA Splicing Endonuclease Subunit 15	Protein Coding	Q8WW01	52	GC01P184061	15.9081	https://www.genecards.org/cgi-bin/carddisp.pl?gene=TSEN15
MCCC2	Methylcrotonyl-CoA Carboxylase Subunit 2	Protein Coding	Q9HCC0	56	GC05P078796	15.9076	https://www.genecards.org/cgi-bin/carddisp.pl?gene=MCCC2
CACNG2	Calcium Voltage-Gated Channel Auxiliary Subunit Gamma 2	Protein Coding	Q9Y698	58	GC22M079317	15.9071	https://www.genecards.org/cgi-bin/carddisp.pl?gene=CACNG2
CPLX1	Complexin 1	Protein Coding	O14810	55	GC04M000784	15.8959	https://www.genecards.org/cgi-bin/carddisp.pl?gene=CPLX1
RNU4ATAC	RNA, U4atac Small Nuclear	RNA Gene		29	GC02P146255	15.8792	https://www.genecards.org/cgi-bin/carddisp.pl?gene=RNU4ATAC
NAT8L	N-Acetyltransferase 8 Like	Protein Coding	Q8N9F0	50	GC04P004741	15.8785	https://www.genecards.org/cgi-bin/carddisp.pl?gene=NAT8L
HDAC1	Histone Deacetylase 1	Protein Coding	Q13547	63	GC01P032292	15.8747	https://www.genecards.org/cgi-bin/carddisp.pl?gene=HDAC1
PTS	6-Pyruvoyltetrahydropterin Synthase	Protein Coding	Q03393	59	GC11P112226	15.8731	https://www.genecards.org/cgi-bin/carddisp.pl?gene=PTS
TRAPPC6B	Trafficking Protein Particle Complex Subunit 6B	Protein Coding	Q86SZ2	52	GC14M039147	15.8731	https://www.genecards.org/cgi-bin/carddisp.pl?gene=TRAPPC6B
ELANE	Elastase, Neutrophil Expressed	Protein Coding	P08246	64	GC19P121813	15.8641	https://www.genecards.org/cgi-bin/carddisp.pl?gene=ELANE
SNRPN	Small Nuclear Ribonucleoprotein Polypeptide N	Protein Coding	P63162	57	GC15P024823	15.8637	https://www.genecards.org/cgi-bin/carddisp.pl?gene=SNRPN
ADORA1	Adenosine A1 Receptor	Protein Coding	P30542	60	GC01P203090	15.8631	https://www.genecards.org/cgi-bin/carddisp.pl?gene=ADORA1
PDGFRA	Platelet Derived Growth Factor Receptor Alpha	Protein Coding	P16234	66	GC04P054229	15.8619	https://www.genecards.org/cgi-bin/carddisp.pl?gene=PDGFRA
LYRM7	LYR Motif Containing 7	Protein Coding	Q5U5X0	51	GC05P131170	15.8581	https://www.genecards.org/cgi-bin/carddisp.pl?gene=LYRM7
BEAN1	Brain Expressed Associated With NEDD4 1	Protein Coding	Q3B7T3	43	GC16P097556	15.8572	https://www.genecards.org/cgi-bin/carddisp.pl?gene=BEAN1
STK11	Serine/Threonine Kinase 11	Protein Coding	Q15831	63	GC19P001177	15.8569	https://www.genecards.org/cgi-bin/carddisp.pl?gene=STK11
RHEB	Ras Homolog, MTORC1 Binding	Protein Coding	Q15382	62	GC07M151466	15.8562	https://www.genecards.org/cgi-bin/carddisp.pl?gene=RHEB
ABCB7	ATP Binding Cassette Subfamily B Member 7	Protein Coding	O75027	57	GC0XM075053	15.8454	https://www.genecards.org/cgi-bin/carddisp.pl?gene=ABCB7
ADGRV1	Adhesion G Protein-Coupled Receptor V1	Protein Coding	Q8WXG9	53	GC05P090529	15.8453	https://www.genecards.org/cgi-bin/carddisp.pl?gene=ADGRV1
GDI1	GDP Dissociation Inhibitor 1	Protein Coding	P31150	58	GC0XP154436	15.839	https://www.genecards.org/cgi-bin/carddisp.pl?gene=GDI1
RHOBTB2	Rho Related BTB Domain Containing 2	Protein Coding	Q9BYZ6	52	GC08P024625	15.8238	https://www.genecards.org/cgi-bin/carddisp.pl?gene=RHOBTB2
KIFBP	Kinesin Family Binding Protein	Protein Coding	Q96EK5	50	GC10P068993	15.8218	https://www.genecards.org/cgi-bin/carddisp.pl?gene=KIFBP
EIF2B3	Eukaryotic Translation Initiation Factor 2B Subunit Gamma	Protein Coding	Q9NR50	54	GC01M044850	15.817	https://www.genecards.org/cgi-bin/carddisp.pl?gene=EIF2B3
MAP2K2	Mitogen-Activated Protein Kinase Kinase 2	Protein Coding	P36507	67	GC19M004090	15.811	https://www.genecards.org/cgi-bin/carddisp.pl?gene=MAP2K2
SLC39A14	Solute Carrier Family 39 Member 14	Protein Coding	Q15043	56	GC08P022367	15.8016	https://www.genecards.org/cgi-bin/carddisp.pl?gene=SLC39A14
ATP6V1B2	ATPase H+ Transporting V1 Subunit B2	Protein Coding	P21281	60	GC08P020197	15.7967	https://www.genecards.org/cgi-bin/carddisp.pl?gene=ATP6V1B2
CHKB	Choline Kinase Beta	Protein Coding	Q9Y259	56	GC22M050578	15.7915	https://www.genecards.org/cgi-bin/carddisp.pl?gene=CHKB
OLIG2	Oligodendrocyte Transcription Factor 2	Protein Coding	Q13516	54	GC21P033025	15.7897	https://www.genecards.org/cgi-bin/carddisp.pl?gene=OLIG2
AFG3L2	AFG3 Like Matrix AAA Peptidase Subunit 2	Protein Coding	Q9Y4W6	58	GC18M012328	15.7893	https://www.genecards.org/cgi-bin/carddisp.pl?gene=AFG3L2
DNAJC19	DnaJ Heat Shock Protein Family (Hsp40) Member C19	Protein Coding	Q96DA6	54	GC03M180983	15.7888	https://www.genecards.org/cgi-bin/carddisp.pl?gene=DNAJC19
TBX1	T-Box Transcription Factor 1	Protein Coding	O43435	55	GC22P075378	15.7859	https://www.genecards.org/cgi-bin/carddisp.pl?gene=TBX1
GSR	Glutathione-Disulfide Reductase	Protein Coding	P00390	63	GC08M030678	15.7824	https://www.genecards.org/cgi-bin/carddisp.pl?gene=GSR
SRD5A3	Steroid 5 Alpha-Reductase 3	Protein Coding	Q9H8P0	54	GC04P055346	15.7816	https://www.genecards.org/cgi-bin/carddisp.pl?gene=SRD5A3
CLCN6	Chloride Voltage-Gated Channel 6	Protein Coding	P51797	54	GC01P011806	15.7785	https://www.genecards.org/cgi-bin/carddisp.pl?gene=CLCN6
COQ2	Coenzyme Q2, Polyprenyltransferase	Protein Coding	Q96H96	54	GC04M083261	15.7742	https://www.genecards.org/cgi-bin/carddisp.pl?gene=COQ2
TIMP3	TIMP Metallopeptidase Inhibitor 3	Protein Coding	P35625	56	GC22P075884	15.7686	https://www.genecards.org/cgi-bin/carddisp.pl?gene=TIMP3
CHRNA2	Cholinergic Receptor Nicotinic Alpha 2 Subunit	Protein Coding	Q15822	60	GC08M027459	15.7615	https://www.genecards.org/cgi-bin/carddisp.pl?gene=CHRNA2
KMT2C	Lysine Methyltransferase 2C	Protein Coding	Q8NEZ4	56	GC07M152134	15.7584	https://www.genecards.org/cgi-bin/carddisp.pl?gene=KMT2C
ADA2	Adenosine Deaminase 2	Protein Coding	Q9NZK5	54	GC22M017328	15.7567	https://www.genecards.org/cgi-bin/carddisp.pl?gene=ADA2
ATRIP	ATR Interacting Protein	Protein Coding	Q8WXE1	56	GC03P059843	15.7544	https://www.genecards.org/cgi-bin/carddisp.pl?gene=ATRIP
SLC12A2	Solute Carrier Family 12 Member 2	Protein Coding	P55011	62	GC05P128083	15.7502	https://www.genecards.org/cgi-bin/carddisp.pl?gene=SLC12A2
PGK1	Phosphoglycerate Kinase 1	Protein Coding	P00558	62	GC0XP078190	15.7412	https://www.genecards.org/cgi-bin/carddisp.pl?gene=PGK1
SURF1	SURF1 Cytochrome C Oxidase Assembly Factor	Protein Coding	Q15526	54	GC09M133351	15.74	https://www.genecards.org/cgi-bin/carddisp.pl?gene=SURF1
MIR29A	MicroRNA 29a	RNA Gene		31	GC07M130876	15.7341	https://www.genecards.org/cgi-bin/carddisp.pl?gene=MIR29A
GTPBP2	GTP Binding Protein 2	Protein Coding	Q9BX10	51	GC06M043605	15.7325	https://www.genecards.org/cgi-bin/carddisp.pl?gene=GTPBP2
SLC25A4	Solute Carrier Family 25 Member 4	Protein Coding	P12235	61	GC04P185143	15.7174	https://www.genecards.org/cgi-bin/carddisp.pl?gene=SLC25A4
SETD1A	SET Domain Containing 1A, Histone Lysine Methyltransferase	Protein Coding	O15047	54	GC16P096751	15.7166	https://www.genecards.org/cgi-bin/carddisp.pl?gene=SETD1A
BIN1	Bridging Integrator 1	Protein Coding	O00499	59	GC02M127048	15.7128	https://www.genecards.org/cgi-bin/carddisp.pl?gene=BIN1
FTH1	Ferritin Heavy Chain 1	Protein Coding	P02794	63	GC11M061959	15.7119	https://www.genecards.org/cgi-bin/carddisp.pl?gene=FTH1
CEP152	Centrosomal Protein 152	Protein Coding	O94986	51	GC15M048712	15.7075	https://www.genecards.org/cgi-bin/carddisp.pl?gene=CEP152
MIF	Macrophage Migration Inhibitory Factor	Protein Coding	P14174	60	GC22P023894	15.7047	https://www.genecards.org/cgi-bin/carddisp.pl?gene=MIF
SLC25A15	Solute Carrier Family 25 Member 15	Protein Coding	Q9Y619	56	GC13P040789	15.701	https://www.genecards.org/cgi-bin/carddisp.pl?gene=SLC25A15
CRHR1	Corticotropin Releasing Hormone Receptor 1	Protein Coding	P34998	56	GC17P045784	15.6858	https://www.genecards.org/cgi-bin/carddisp.pl?gene=CRHR1
MDM2	MDM2 Proto-Oncogene	Protein Coding	Q00987	67	GC12P068808	15.676	https://www.genecards.org/cgi-bin/carddisp.pl?gene=MDM2
SLC35A2	Solute Carrier Family 35 Member A2	Protein Coding	P78381	53	GC0XM048903	15.6748	https://www.genecards.org/cgi-bin/carddisp.pl?gene=SLC35A2
ZNF335	Zinc Finger Protein 335	Protein Coding	Q9H4Z2	50	GC20M045948	15.6642	https://www.genecards.org/cgi-bin/carddisp.pl?gene=ZNF335
DHCR24	24-Dehydrocholesterol Reductase	Protein Coding	Q15392	57	GC01M054849	15.6616	https://www.genecards.org/cgi-bin/carddisp.pl?gene=DHCR24
REEP1	Receptor Accessory Protein 1	Protein Coding	Q9H902	52	GC02M086213	15.6577	https://www.genecards.org/cgi-bin/carddisp.pl?gene=REEP1
ADIPOQ	Adiponectin, C1Q And Collagen Domain Containing	Protein Coding	Q15848	59	GC03P186842	15.6541	https://www.genecards.org/cgi-bin/carddisp.pl?gene=ADIPOQ
LBR	Lamin B Receptor	Protein Coding	Q14739	59	GC01M225401	15.6408	https://www.genecards.org/cgi-bin/carddisp.pl?gene=LBR
SV2A	Synaptic Vesicle Glycoprotein 2A	Protein Coding	Q7L0J3	58	GC01M149903	15.6374	https://www.genecards.org/cgi-bin/carddisp.pl?gene=SV2A
TLR2	Toll Like Receptor 2	Protein Coding	O60603	65	GC04P153684	15.6275	https://www.genecards.org/cgi-bin/carddisp.pl?gene=TLR2
ERMARD	ER Membrane Associated RNA Degradation	Protein Coding	Q5T6L9	44	GC06P169751	15.6138	https://www.genecards.org/cgi-bin/carddisp.pl?gene=ERMARD
RBFOX1	RNA Binding Fox-1 Homolog 1	Protein Coding	Q9NWB1	53	GC16P095908	15.6102	https://www.genecards.org/cgi-bin/carddisp.pl?gene=RBFOX1
HMGCL	3-Hydroxy-3-Methylglutaryl-CoA Lyase	Protein Coding	P35914	59	GC01M023801	15.5984	https://www.genecards.org/cgi-bin/carddisp.pl?gene=HMGCL
FASTKD2	FAST Kinase Domains 2	Protein Coding	Q9NYY8	51	GC02P206770	15.597	https://www.genecards.org/cgi-bin/carddisp.pl?gene=FASTKD2
PEX11B	Peroxisomal Biogenesis Factor 11 Beta	Protein Coding	O96011	52	GC01M145911	15.593	https://www.genecards.org/cgi-bin/carddisp.pl?gene=PEX11B
HSP90AA1	Heat Shock Protein 90 Alpha Family Class A Member 1	Protein Coding	P07900	64	GC14M102080	15.5904	https://www.genecards.org/cgi-bin/carddisp.pl?gene=HSP90AA1
ZBTB20	Zinc Finger And BTB Domain Containing 20	Protein Coding	Q9HC78	54	GC03M114315	15.5899	https://www.genecards.org/cgi-bin/carddisp.pl?gene=ZBTB20
PAK1	P21 (RAC1) Activated Kinase 1	Protein Coding	Q13153	63	GC11M129416	15.58	https://www.genecards.org/cgi-bin/carddisp.pl?gene=PAK1
CDKN1A	Cyclin Dependent Kinase Inhibitor 1A	Protein Coding	P38936	63	GC06P144910	15.5632	https://www.genecards.org/cgi-bin/carddisp.pl?gene=CDKN1A
IER3IP1	Immediate Early Response 3 Interacting Protein 1	Protein Coding	Q9Y5U9	48	GC18M047152	15.5622	https://www.genecards.org/cgi-bin/carddisp.pl?gene=IER3IP1
DANCR	Differentiation Antagonizing Non-Protein Coding RNA	RNA Gene	P0C864	32	GC04P052712	15.5579	https://www.genecards.org/cgi-bin/carddisp.pl?gene=DANCR
ZNF423	Zinc Finger Protein 423	Protein Coding	Q2M1K9	52	GC16M049487	15.5522	https://www.genecards.org/cgi-bin/carddisp.pl?gene=ZNF423
EIF2B4	Eukaryotic Translation Initiation Factor 2B Subunit Delta	Protein Coding	Q9UI10	56	GC02M027364	15.5416	https://www.genecards.org/cgi-bin/carddisp.pl?gene=EIF2B4
CSF1	Colony Stimulating Factor 1	Protein Coding	P09603	58	GC01P109911	15.5312	https://www.genecards.org/cgi-bin/carddisp.pl?gene=CSF1
MAPRE2	Microtubule Associated Protein RP/EB Family Member 2	Protein Coding	Q15555	54	GC18P034976	15.5274	https://www.genecards.org/cgi-bin/carddisp.pl?gene=MAPRE2
CALR	Calreticulin	Protein Coding	P27797	64	GC19P012938	15.5251	https://www.genecards.org/cgi-bin/carddisp.pl?gene=CALR
HERC1	HECT And RLD Domain Containing E3 Ubiquitin Protein Ligase Family Member 1	Protein Coding	Q15751	52	GC15M063608	15.5246	https://www.genecards.org/cgi-bin/carddisp.pl?gene=HERC1
ERF	ETS2 Repressor Factor	Protein Coding	P50548	53	GC19M042247	15.5242	https://www.genecards.org/cgi-bin/carddisp.pl?gene=ERF
KCNAB2	Potassium Voltage-Gated Channel Subfamily A Regulatory Beta Subunit 2	Protein Coding	Q13303	54	GC01P050778	15.5242	https://www.genecards.org/cgi-bin/carddisp.pl?gene=KCNAB2
PLAT	Plasminogen Activator, Tissue Type	Protein Coding	P00750	62	GC08M042174	15.5214	https://www.genecards.org/cgi-bin/carddisp.pl?gene=PLAT
FHL1	Four And A Half LIM Domains 1	Protein Coding	Q13642	58	GC0XP136146	15.508	https://www.genecards.org/cgi-bin/carddisp.pl?gene=FHL1
DLG1	Discs Large MAGUK Scaffold Protein 1	Protein Coding	Q12959	56	GC03M197042	15.5071	https://www.genecards.org/cgi-bin/carddisp.pl?gene=DLG1
IVD	Isovaleryl-CoA Dehydrogenase	Protein Coding	P26440	57	GC15P040405	15.5044	https://www.genecards.org/cgi-bin/carddisp.pl?gene=IVD
MAX	MYC Associated Factor X	Protein Coding	P61244	59	GC14M065341	15.4965	https://www.genecards.org/cgi-bin/carddisp.pl?gene=MAX
PTH	Parathyroid Hormone	Protein Coding	P01270	58	GC11M013492	15.4952	https://www.genecards.org/cgi-bin/carddisp.pl?gene=PTH
NEUROD2	Neuronal Differentiation 2	Protein Coding	Q15784	55	GC17M039603	15.4949	https://www.genecards.org/cgi-bin/carddisp.pl?gene=NEUROD2
PDHB	Pyruvate Dehydrogenase E1 Subunit Beta	Protein Coding	P11177	59	GC03M058455	15.4905	https://www.genecards.org/cgi-bin/carddisp.pl?gene=PDHB
ITGB1	Integrin Subunit Beta 1	Protein Coding	P05556	63	GC10M036096	15.4843	https://www.genecards.org/cgi-bin/carddisp.pl?gene=ITGB1
ALDH4A1	Aldehyde Dehydrogenase 4 Family Member A1	Protein Coding	P30038	58	GC01M018871	15.4801	https://www.genecards.org/cgi-bin/carddisp.pl?gene=ALDH4A1
EIF2AK2	Eukaryotic Translation Initiation Factor 2 Alpha Kinase 2	Protein Coding	P19525	63	GC02M037099	15.4711	https://www.genecards.org/cgi-bin/carddisp.pl?gene=EIF2AK2
CACNA2D1	Calcium Voltage-Gated Channel Auxiliary Subunit Alpha2delta 1	Protein Coding	P54289	59	GC07M081946	15.4705	https://www.genecards.org/cgi-bin/carddisp.pl?gene=CACNA2D1
GYS1	Glycogen Synthase 1	Protein Coding	P13807	62	GC19M097165	15.4664	https://www.genecards.org/cgi-bin/carddisp.pl?gene=GYS1
NDUFV1	NADH:Ubiquinone Oxidoreductase Core Subunit V1	Protein Coding	P49821	58	GC11P094816	15.465	https://www.genecards.org/cgi-bin/carddisp.pl?gene=NDUFV1
GAP43	Growth Associated Protein 43	Protein Coding	P17677	56	GC03P115623	15.4511	https://www.genecards.org/cgi-bin/carddisp.pl?gene=GAP43
TGFB2	Transforming Growth Factor Beta 2	Protein Coding	P61812	64	GC01P218345	15.4486	https://www.genecards.org/cgi-bin/carddisp.pl?gene=TGFB2
SLC12A6	Solute Carrier Family 12 Member 6	Protein Coding	Q9UHW9	59	GC15M034229	15.4462	https://www.genecards.org/cgi-bin/carddisp.pl?gene=SLC12A6
NAA10	N-Alpha-Acetyltransferase 10, NatA Catalytic Subunit	Protein Coding	P41227	58	GC0XM153929	15.443	https://www.genecards.org/cgi-bin/carddisp.pl?gene=NAA10
ADA	Adenosine Deaminase	Protein Coding	P00813	64	GC20M044620	15.4312	https://www.genecards.org/cgi-bin/carddisp.pl?gene=ADA
SUMF1	Sulfatase Modifying Factor 1	Protein Coding	Q8NBK3	55	GC03M003700	15.4213	https://www.genecards.org/cgi-bin/carddisp.pl?gene=SUMF1
ALX4	ALX Homeobox 4	Protein Coding	Q9H161	52	GC11M044238	15.4187	https://www.genecards.org/cgi-bin/carddisp.pl?gene=ALX4
AQP2	Aquaporin 2	Protein Coding	P41181	60	GC12P049950	15.4163	https://www.genecards.org/cgi-bin/carddisp.pl?gene=AQP2
DPM2	Dolichyl-Phosphate Mannosyltransferase Subunit 2, Regulatory	Protein Coding	O94777	49	GC09M127935	15.4088	https://www.genecards.org/cgi-bin/carddisp.pl?gene=DPM2
GAA	Alpha Glucosidase	Protein Coding	P10253	64	GC17P080101	15.4043	https://www.genecards.org/cgi-bin/carddisp.pl?gene=GAA
ATXN10	Ataxin 10	Protein Coding	Q9UBB4	55	GC22P076273	15.4043	https://www.genecards.org/cgi-bin/carddisp.pl?gene=ATXN10
HADH	Hydroxyacyl-CoA Dehydrogenase	Protein Coding	Q16836	60	GC04P107989	15.3991	https://www.genecards.org/cgi-bin/carddisp.pl?gene=HADH
PIGP	Phosphatidylinositol Glycan Anchor Biosynthesis Class P	Protein Coding	P57054	49	GC21M037059	15.3789	https://www.genecards.org/cgi-bin/carddisp.pl?gene=PIGP
ACAD9	Acyl-CoA Dehydrogenase Family Member 9	Protein Coding	Q9H845	57	GC03P140018	15.3787	https://www.genecards.org/cgi-bin/carddisp.pl?gene=ACAD9
MIRLET7C	MicroRNA Let-7c	RNA Gene		31	GC21P018986	15.3746	https://www.genecards.org/cgi-bin/carddisp.pl?gene=MIRLET7C
BCS1L	BCS1 Homolog, Ubiquinol-Cytochrome C Reductase Complex Chaperone	Protein Coding	Q9Y276	57	GC02P218658	15.3709	https://www.genecards.org/cgi-bin/carddisp.pl?gene=BCS1L
RLBP1	Retinaldehyde Binding Protein 1	Protein Coding	P12271	57	GC15M089209	15.3686	https://www.genecards.org/cgi-bin/carddisp.pl?gene=RLBP1
POGZ	Pogo Transposable Element Derived With ZNF Domain	Protein Coding	Q7Z3K3	53	GC01M151402	15.3681	https://www.genecards.org/cgi-bin/carddisp.pl?gene=POGZ
MMUT	Methylmalonyl-CoA Mutase	Protein Coding	P22033	58	GC06M049430	15.3639	https://www.genecards.org/cgi-bin/carddisp.pl?gene=MMUT
JAM2	Junctional Adhesion Molecule 2	Protein Coding	P57087	54	GC21P025639	15.3484	https://www.genecards.org/cgi-bin/carddisp.pl?gene=JAM2
GRIA4	Glutamate Ionotropic Receptor AMPA Type Subunit 4	Protein Coding	P48058	62	GC11P105609	15.3445	https://www.genecards.org/cgi-bin/carddisp.pl?gene=GRIA4
KANSL1	KAT8 Regulatory NSL Complex Subunit 1	Protein Coding	Q7Z3B3	53	GC17M085408	15.3444	https://www.genecards.org/cgi-bin/carddisp.pl?gene=KANSL1
B2M	Beta-2-Microglobulin	Protein Coding	P61769	63	GC15P044711	15.3273	https://www.genecards.org/cgi-bin/carddisp.pl?gene=B2M
TSFM	Ts Translation Elongation Factor, Mitochondrial	Protein Coding	P43897	56	GC12P057782	15.3272	https://www.genecards.org/cgi-bin/carddisp.pl?gene=TSFM
CDON	Cell Adhesion Associated, Oncogene Regulated	Protein Coding	Q4KMG0	59	GC11M125955	15.3271	https://www.genecards.org/cgi-bin/carddisp.pl?gene=CDON
HIVEP2	HIVEP Zinc Finger 2	Protein Coding	P31629	52	GC06M142751	15.3257	https://www.genecards.org/cgi-bin/carddisp.pl?gene=HIVEP2
IQSEC1	IQ Motif And Sec7 Domain ArfGEF 1	Protein Coding	Q6DN90	54	GC03M026787	15.3252	https://www.genecards.org/cgi-bin/carddisp.pl?gene=IQSEC1
CEP164	Centrosomal Protein 164	Protein Coding	Q9UPV0	54	GC11P117314	15.3242	https://www.genecards.org/cgi-bin/carddisp.pl?gene=CEP164
LOC106627981	GBA Recombination Region	Functional Element		11	GC01P155233	15.3222	https://www.genecards.org/cgi-bin/carddisp.pl?gene=LOC106627981
KNG1	Kininogen 1	Protein Coding	P01042	60	GC03P186717	15.3216	https://www.genecards.org/cgi-bin/carddisp.pl?gene=KNG1
TANGO2	Transport And Golgi Organization 2 Homolog	Protein Coding	Q6ICL3	47	GC22P020017	15.321	https://www.genecards.org/cgi-bin/carddisp.pl?gene=TANGO2
ETFDH	Electron Transfer Flavoprotein Dehydrogenase	Protein Coding	Q16134	58	GC04P158672	15.3148	https://www.genecards.org/cgi-bin/carddisp.pl?gene=ETFDH
COL2A1	Collagen Type II Alpha 1 Chain	Protein Coding	P02458	63	GC12M047972	15.3145	https://www.genecards.org/cgi-bin/carddisp.pl?gene=COL2A1
GAD2	Glutamate Decarboxylase 2	Protein Coding	Q05329	56	GC10P026216	15.3123	https://www.genecards.org/cgi-bin/carddisp.pl?gene=GAD2
SREBF1	Sterol Regulatory Element Binding Transcription Factor 1	Protein Coding	P36956	62	GC17M017810	15.3117	https://www.genecards.org/cgi-bin/carddisp.pl?gene=SREBF1
FBXL4	F-Box And Leucine Rich Repeat Protein 4	Protein Coding	Q9UKA2	52	GC06M098868	15.3051	https://www.genecards.org/cgi-bin/carddisp.pl?gene=FBXL4
MCCC1	Methylcrotonyl-CoA Carboxylase Subunit 1	Protein Coding	Q96RQ3	56	GC03M183015	15.3026	https://www.genecards.org/cgi-bin/carddisp.pl?gene=MCCC1
COL5A1	Collagen Type V Alpha 1 Chain	Protein Coding	P20908	59	GC09P134641	15.3003	https://www.genecards.org/cgi-bin/carddisp.pl?gene=COL5A1
TBC1D23	TBC1 Domain Family Member 23	Protein Coding	Q9NUY8	50	GC03P100260	15.2997	https://www.genecards.org/cgi-bin/carddisp.pl?gene=TBC1D23
KCNC1	Potassium Voltage-Gated Channel Subfamily C Member 1	Protein Coding	P48547	58	GC11P018005	15.2985	https://www.genecards.org/cgi-bin/carddisp.pl?gene=KCNC1
JPH3	Junctophilin 3	Protein Coding	Q8WXH2	54	GC16P087601	15.294	https://www.genecards.org/cgi-bin/carddisp.pl?gene=JPH3
DPM3	Dolichyl-Phosphate Mannosyltransferase Subunit 3, Regulatory	Protein Coding	Q9P2X0	52	GC01M155139	15.2898	https://www.genecards.org/cgi-bin/carddisp.pl?gene=DPM3
CD40LG	CD40 Ligand	Protein Coding	P29965	63	GC0XP136649	15.284	https://www.genecards.org/cgi-bin/carddisp.pl?gene=CD40LG
SMAD3	SMAD Family Member 3	Protein Coding	P84022	66	GC15P067063	15.2798	https://www.genecards.org/cgi-bin/carddisp.pl?gene=SMAD3
HSPA4	Heat Shock Protein Family A (Hsp70) Member 4	Protein Coding	P34932	56	GC05P133062	15.2744	https://www.genecards.org/cgi-bin/carddisp.pl?gene=HSPA4
SOX2-OT	SOX2 Overlapping Transcript	RNA Gene		35	GC03P180989	15.2726	https://www.genecards.org/cgi-bin/carddisp.pl?gene=SOX2-OT
MIR140	MicroRNA 140	RNA Gene		33	GC16P097800	15.2697	https://www.genecards.org/cgi-bin/carddisp.pl?gene=MIR140
IL12A	Interleukin 12A	Protein Coding	P29459	57	GC03P159988	15.268	https://www.genecards.org/cgi-bin/carddisp.pl?gene=IL12A
KDM5C	Lysine Demethylase 5C	Protein Coding	P41229	59	GC0XM053176	15.2637	https://www.genecards.org/cgi-bin/carddisp.pl?gene=KDM5C
COQ9	Coenzyme Q9	Protein Coding	O75208	54	GC16P057447	15.2587	https://www.genecards.org/cgi-bin/carddisp.pl?gene=COQ9
PPP2CA	Protein Phosphatase 2 Catalytic Subunit Alpha	Protein Coding	P67775	64	GC05M134194	15.2537	https://www.genecards.org/cgi-bin/carddisp.pl?gene=PPP2CA
FLCN	Folliculin	Protein Coding	Q8NFG4	55	GC17M017212	15.2514	https://www.genecards.org/cgi-bin/carddisp.pl?gene=FLCN
ANGPT1	Angiopoietin 1	Protein Coding	Q15389	58	GC08M107246	15.2497	https://www.genecards.org/cgi-bin/carddisp.pl?gene=ANGPT1
CLCN4	Chloride Voltage-Gated Channel 4	Protein Coding	P51793	54	GC0XP010156	15.2462	https://www.genecards.org/cgi-bin/carddisp.pl?gene=CLCN4
TGFBR2	Transforming Growth Factor Beta Receptor 2	Protein Coding	P37173	65	GC03P030623	15.2398	https://www.genecards.org/cgi-bin/carddisp.pl?gene=TGFBR2
DKC1	Dyskerin Pseudouridine Synthase 1	Protein Coding	O60832	59	GC0XP154762	15.2379	https://www.genecards.org/cgi-bin/carddisp.pl?gene=DKC1
NPHP1	Nephrocystin 1	Protein Coding	O15259	55	GC02M110122	15.2308	https://www.genecards.org/cgi-bin/carddisp.pl?gene=NPHP1
MIR126	MicroRNA 126	RNA Gene		31	GC09P136670	15.223	https://www.genecards.org/cgi-bin/carddisp.pl?gene=MIR126
USP7	Ubiquitin Specific Peptidase 7	Protein Coding	Q93009	62	GC16M008892	15.2194	https://www.genecards.org/cgi-bin/carddisp.pl?gene=USP7
FN1	Fibronectin 1	Protein Coding	P02751	63	GC02M215360	15.2168	https://www.genecards.org/cgi-bin/carddisp.pl?gene=FN1
CCL5	C-C Motif Chemokine Ligand 5	Protein Coding	P13501	56	GC17M035871	15.2136	https://www.genecards.org/cgi-bin/carddisp.pl?gene=CCL5
KCNC3	Potassium Voltage-Gated Channel Subfamily C Member 3	Protein Coding	Q14003	58	GC19M097248	15.2101	https://www.genecards.org/cgi-bin/carddisp.pl?gene=KCNC3
NDUFS3	NADH:Ubiquinone Oxidoreductase Core Subunit S3	Protein Coding	O75489	59	GC11P048105	15.2088	https://www.genecards.org/cgi-bin/carddisp.pl?gene=NDUFS3
HLCS	Holocarboxylase Synthetase	Protein Coding	P50747	55	GC21M036750	15.2065	https://www.genecards.org/cgi-bin/carddisp.pl?gene=HLCS
MYO5A	Myosin VA	Protein Coding	Q9Y4I1	57	GC15M153299	15.2045	https://www.genecards.org/cgi-bin/carddisp.pl?gene=MYO5A
GM2A	Ganglioside GM2 Activator	Protein Coding	P17900	55	GC05P151212	15.1959	https://www.genecards.org/cgi-bin/carddisp.pl?gene=GM2A
ATP2A2	ATPase Sarcoplasmic/Endoplasmic Reticulum Ca2+ Transporting 2	Protein Coding	P16615	64	GC12P110280	15.1913	https://www.genecards.org/cgi-bin/carddisp.pl?gene=ATP2A2
CYFIP2	Cytoplasmic FMR1 Interacting Protein 2	Protein Coding	Q96F07	55	GC05P157267	15.1882	https://www.genecards.org/cgi-bin/carddisp.pl?gene=CYFIP2
TMTC3	Transmembrane O-Mannosyltransferase Targeting Cadherins 3	Protein Coding	Q6ZXV5	48	GC12P088142	15.1866	https://www.genecards.org/cgi-bin/carddisp.pl?gene=TMTC3
APTX	Aprataxin	Protein Coding	Q7Z2E3	56	GC09M032886	15.1829	https://www.genecards.org/cgi-bin/carddisp.pl?gene=APTX
EGR1	Early Growth Response 1	Protein Coding	P18146	58	GC05P138465	15.1809	https://www.genecards.org/cgi-bin/carddisp.pl?gene=EGR1
CBL	Cbl Proto-Oncogene	Protein Coding	P22681	64	GC11P119206	15.1803	https://www.genecards.org/cgi-bin/carddisp.pl?gene=CBL
DIAPH1	Diaphanous Related Formin 1	Protein Coding	O60610	60	GC05M141516	15.1702	https://www.genecards.org/cgi-bin/carddisp.pl?gene=DIAPH1
MAN2B1	Mannosidase Alpha Class 2B Member 1	Protein Coding	O00754	56	GC19M096268	15.1658	https://www.genecards.org/cgi-bin/carddisp.pl?gene=MAN2B1
ATR	ATR Serine/Threonine Kinase	Protein Coding	Q13535	66	GC03M142449	15.1595	https://www.genecards.org/cgi-bin/carddisp.pl?gene=ATR
DCHS1	Dachsous Cadherin-Related 1	Protein Coding	Q96JQ0	50	GC11M006621	15.1448	https://www.genecards.org/cgi-bin/carddisp.pl?gene=DCHS1
COX6B1	Cytochrome C Oxidase Subunit 6B1	Protein Coding	P14854	56	GC19P122929	15.1434	https://www.genecards.org/cgi-bin/carddisp.pl?gene=COX6B1
AP1S2	Adaptor Related Protein Complex 1 Subunit Sigma 2	Protein Coding	P56377	54	GC0XM015825	15.1347	https://www.genecards.org/cgi-bin/carddisp.pl?gene=AP1S2
CUL4B	Cullin 4B	Protein Coding	Q13620	56	GC0XM120524	15.1253	https://www.genecards.org/cgi-bin/carddisp.pl?gene=CUL4B
SUCLG1	Succinate-CoA Ligase GDP/ADP-Forming Subunit Alpha	Protein Coding	P53597	58	GC02M084423	15.1239	https://www.genecards.org/cgi-bin/carddisp.pl?gene=SUCLG1
ZBTB18	Zinc Finger And BTB Domain Containing 18	Protein Coding	Q99592	54	GC01P244048	15.1163	https://www.genecards.org/cgi-bin/carddisp.pl?gene=ZBTB18
TRAPPC12	Trafficking Protein Particle Complex Subunit 12	Protein Coding	Q8WVT3	48	GC02P003404	15.1144	https://www.genecards.org/cgi-bin/carddisp.pl?gene=TRAPPC12
TUBA4A	Tubulin Alpha 4a	Protein Coding	P68366	60	GC02M219249	15.1072	https://www.genecards.org/cgi-bin/carddisp.pl?gene=TUBA4A
CAV1	Caveolin 1	Protein Coding	Q03135	62	GC07P116524	15.1054	https://www.genecards.org/cgi-bin/carddisp.pl?gene=CAV1
EFTUD2	Elongation Factor Tu GTP Binding Domain Containing 2	Protein Coding	Q15029	55	GC17M085343	15.1053	https://www.genecards.org/cgi-bin/carddisp.pl?gene=EFTUD2
RRM2B	Ribonucleotide Reductase Regulatory TP53 Inducible Subunit M2B	Protein Coding	Q7LG56	62	GC08M102204	15.0979	https://www.genecards.org/cgi-bin/carddisp.pl?gene=RRM2B
GNAI1	G Protein Subunit Alpha I1	Protein Coding	P63096	60	GC07P088666	15.0958	https://www.genecards.org/cgi-bin/carddisp.pl?gene=GNAI1
APOB	Apolipoprotein B	Protein Coding	P04114	59	GC02M020956	15.085	https://www.genecards.org/cgi-bin/carddisp.pl?gene=APOB
ALDH3A2	Aldehyde Dehydrogenase 3 Family Member A2	Protein Coding	P51648	59	GC17P019648	15.0815	https://www.genecards.org/cgi-bin/carddisp.pl?gene=ALDH3A2
HCFC1	Host Cell Factor C1	Protein Coding	P51610	59	GC0XM153947	15.081	https://www.genecards.org/cgi-bin/carddisp.pl?gene=HCFC1
ITPA	Inosine Triphosphatase	Protein Coding	Q9BY32	60	GC20P008974	15.0809	https://www.genecards.org/cgi-bin/carddisp.pl?gene=ITPA
IL1RN	Interleukin 1 Receptor Antagonist	Protein Coding	P18510	63	GC02P146140	15.077	https://www.genecards.org/cgi-bin/carddisp.pl?gene=IL1RN
SKI	SKI Proto-Oncogene	Protein Coding	P12755	58	GC01P050683	15.0708	https://www.genecards.org/cgi-bin/carddisp.pl?gene=SKI
PIK3CB	Phosphatidylinositol-4,5-Bisphosphate 3-Kinase Catalytic Subunit Beta	Protein Coding	P42338	62	GC03M138652	15.0645	https://www.genecards.org/cgi-bin/carddisp.pl?gene=PIK3CB
STUB1	STIP1 Homology And U-Box Containing Protein 1	Protein Coding	Q9UNE7	58	GC16P095752	15.064	https://www.genecards.org/cgi-bin/carddisp.pl?gene=STUB1
COQ8B	Coenzyme Q8B	Protein Coding	Q96D53	52	GC19M096878	15.063	https://www.genecards.org/cgi-bin/carddisp.pl?gene=COQ8B
NPRL3	NPR3 Like, GATOR1 Complex Subunit	Protein Coding	Q12980	51	GC16M000084	15.0618	https://www.genecards.org/cgi-bin/carddisp.pl?gene=NPRL3
GAN	Gigaxonin	Protein Coding	Q9H2C0	53	GC16P098135	15.0538	https://www.genecards.org/cgi-bin/carddisp.pl?gene=GAN
CALM3	Calmodulin 3	Protein Coding	P0DP25	55	GC19P046601	15.0499	https://www.genecards.org/cgi-bin/carddisp.pl?gene=CALM3
BTK	Bruton Tyrosine Kinase	Protein Coding	Q06187	67	GC0XM101349	15.0451	https://www.genecards.org/cgi-bin/carddisp.pl?gene=BTK
SLC22A5	Solute Carrier Family 22 Member 5	Protein Coding	O76082	59	GC05P132369	15.0378	https://www.genecards.org/cgi-bin/carddisp.pl?gene=SLC22A5
MARS2	Methionyl-TRNA Synthetase 2, Mitochondrial	Protein Coding	Q96GW9	54	GC02P197705	15.036	https://www.genecards.org/cgi-bin/carddisp.pl?gene=MARS2
KCNH1	Potassium Voltage-Gated Channel Subfamily H Member 1	Protein Coding	O95259	59	GC01M210678	15.0354	https://www.genecards.org/cgi-bin/carddisp.pl?gene=KCNH1
SNAP29	Synaptosome Associated Protein 29	Protein Coding	O95721	55	GC22P020859	15.034	https://www.genecards.org/cgi-bin/carddisp.pl?gene=SNAP29
MID1	Midline 1	Protein Coding	O15344	55	GC0XM010445	15.0319	https://www.genecards.org/cgi-bin/carddisp.pl?gene=MID1
CUL3	Cullin 3	Protein Coding	Q13618	61	GC02M224470	15.0308	https://www.genecards.org/cgi-bin/carddisp.pl?gene=CUL3
MAOB	Monoamine Oxidase B	Protein Coding	P27338	56	GC0XM043766	15.0241	https://www.genecards.org/cgi-bin/carddisp.pl?gene=MAOB
NOX4	NADPH Oxidase 4	Protein Coding	Q9NPH5	55	GC11M089324	15.0234	https://www.genecards.org/cgi-bin/carddisp.pl?gene=NOX4
ANGPT2	Angiopoietin 2	Protein Coding	O15123	62	GC08M006499	15.0209	https://www.genecards.org/cgi-bin/carddisp.pl?gene=ANGPT2
ETFA	Electron Transfer Flavoprotein Subunit Alpha	Protein Coding	P13804	58	GC15M151951	15.0102	https://www.genecards.org/cgi-bin/carddisp.pl?gene=ETFA
PIGN	Phosphatidylinositol Glycan Anchor Biosynthesis Class N	Protein Coding	O95427	53	GC18M061905	15.0072	https://www.genecards.org/cgi-bin/carddisp.pl?gene=PIGN
FGF1	Fibroblast Growth Factor 1	Protein Coding	P05230	60	GC05M142555	14.9986	https://www.genecards.org/cgi-bin/carddisp.pl?gene=FGF1
PCLO	Piccolo Presynaptic Cytomatrix Protein	Protein Coding	Q9Y6V0	51	GC07M082754	14.983	https://www.genecards.org/cgi-bin/carddisp.pl?gene=PCLO
EMC1	ER Membrane Protein Complex Subunit 1	Protein Coding	Q8N766	51	GC01M019215	14.9828	https://www.genecards.org/cgi-bin/carddisp.pl?gene=EMC1
KIF11	Kinesin Family Member 11	Protein Coding	P52732	62	GC10P092574	14.9802	https://www.genecards.org/cgi-bin/carddisp.pl?gene=KIF11
GLRA1	Glycine Receptor Alpha 1	Protein Coding	P23415	59	GC05M151822	14.9796	https://www.genecards.org/cgi-bin/carddisp.pl?gene=GLRA1
EMSLR	E2F1 MRNA Stabilizing LncRNA	RNA Gene		21	GC07P107551	14.97	https://www.genecards.org/cgi-bin/carddisp.pl?gene=EMSLR
ABCA2	ATP Binding Cassette Subfamily A Member 2	Protein Coding	Q9BZC7	55	GC09M137007	14.9679	https://www.genecards.org/cgi-bin/carddisp.pl?gene=ABCA2
SDCCAG8	SHH Signaling And Ciliogenesis Regulator SDCCAG8	Protein Coding	Q86SQ7	54	GC01P243255	14.9643	https://www.genecards.org/cgi-bin/carddisp.pl?gene=SDCCAG8
YY1	YY1 Transcription Factor	Protein Coding	P25490	61	GC14P100238	14.9618	https://www.genecards.org/cgi-bin/carddisp.pl?gene=YY1
PTN	Pleiotrophin	Protein Coding	P21246	53	GC07M137227	14.9542	https://www.genecards.org/cgi-bin/carddisp.pl?gene=PTN
ATP6V0A1	ATPase H+ Transporting V0 Subunit A1	Protein Coding	Q93050	54	GC17P042458	14.9512	https://www.genecards.org/cgi-bin/carddisp.pl?gene=ATP6V0A1
NDUFS7	NADH:Ubiquinone Oxidoreductase Core Subunit S7	Protein Coding	O75251	58	GC19P121862	14.9464	https://www.genecards.org/cgi-bin/carddisp.pl?gene=NDUFS7
NADK2	NAD Kinase 2, Mitochondrial	Protein Coding	Q4G0N4	50	GC05M036402	14.9455	https://www.genecards.org/cgi-bin/carddisp.pl?gene=NADK2
UBQLN2	Ubiquilin 2	Protein Coding	Q9UHD9	55	GC0XP056563	14.9373	https://www.genecards.org/cgi-bin/carddisp.pl?gene=UBQLN2
NMNAT1	Nicotinamide Nucleotide Adenylyltransferase 1	Protein Coding	Q9HAN9	60	GC01P051116	14.9364	https://www.genecards.org/cgi-bin/carddisp.pl?gene=NMNAT1
ASTN1	Astrotactin 1	Protein Coding	O14525	49	GC01M176857	14.9355	https://www.genecards.org/cgi-bin/carddisp.pl?gene=ASTN1
NR2F1	Nuclear Receptor Subfamily 2 Group F Member 1	Protein Coding	P10589	57	GC05P093583	14.9329	https://www.genecards.org/cgi-bin/carddisp.pl?gene=NR2F1
OCRL	OCRL Inositol Polyphosphate-5-Phosphatase	Protein Coding	Q01968	56	GC0XP129539	14.9319	https://www.genecards.org/cgi-bin/carddisp.pl?gene=OCRL
CCDC88A	Coiled-Coil Domain Containing 88A	Protein Coding	Q3V6T2	54	GC02M055287	14.9313	https://www.genecards.org/cgi-bin/carddisp.pl?gene=CCDC88A
TAF1	TATA-Box Binding Protein Associated Factor 1	Protein Coding	P21675	61	GC0XP071366	14.9304	https://www.genecards.org/cgi-bin/carddisp.pl?gene=TAF1
DOCK3	Dedicator Of Cytokinesis 3	Protein Coding	Q8IZD9	53	GC03P059927	14.9201	https://www.genecards.org/cgi-bin/carddisp.pl?gene=DOCK3
HBB	Hemoglobin Subunit Beta	Protein Coding	P68871	58	GC11M012709	14.9181	https://www.genecards.org/cgi-bin/carddisp.pl?gene=HBB
PDE10A	Phosphodiesterase 10A	Protein Coding	Q9Y233	58	GC06M165327	14.9179	https://www.genecards.org/cgi-bin/carddisp.pl?gene=PDE10A
BMP6	Bone Morphogenetic Protein 6	Protein Coding	P22004	57	GC06P007726	14.915	https://www.genecards.org/cgi-bin/carddisp.pl?gene=BMP6
CNTF	Ciliary Neurotrophic Factor	Protein Coding	P26441	54	GC11P058622	14.9131	https://www.genecards.org/cgi-bin/carddisp.pl?gene=CNTF
CHKA	Choline Kinase Alpha	Protein Coding	P35790	55	GC11M068052	14.9118	https://www.genecards.org/cgi-bin/carddisp.pl?gene=CHKA
ALG1	ALG1 Chitobiosyldiphosphodolichol Beta-Mannosyltransferase	Protein Coding	Q9BT22	58	GC16P005033	14.906	https://www.genecards.org/cgi-bin/carddisp.pl?gene=ALG1
TBC1D20	TBC1 Domain Family Member 20	Protein Coding	Q96BZ9	50	GC20M000423	14.9001	https://www.genecards.org/cgi-bin/carddisp.pl?gene=TBC1D20
PRL	Prolactin	Protein Coding	P01236	56	GC06M022287	14.8867	https://www.genecards.org/cgi-bin/carddisp.pl?gene=PRL
DLG3	Discs Large MAGUK Scaffold Protein 3	Protein Coding	Q92796	56	GC0XP070444	14.8851	https://www.genecards.org/cgi-bin/carddisp.pl?gene=DLG3
MTRR	5-Methyltetrahydrofolate-Homocysteine Methyltransferase Reductase	Protein Coding	Q9UBK8	56	GC05P007851	14.8816	https://www.genecards.org/cgi-bin/carddisp.pl?gene=MTRR
VPS51	VPS51 Subunit Of GARP Complex	Protein Coding	Q9UID3	50	GC11P065089	14.88	https://www.genecards.org/cgi-bin/carddisp.pl?gene=VPS51
F8	Coagulation Factor VIII	Protein Coding	P00451	60	GC0XM154835	14.8796	https://www.genecards.org/cgi-bin/carddisp.pl?gene=F8
ABCC9	ATP Binding Cassette Subfamily C Member 9	Protein Coding	O60706	57	GC12M021797	14.868	https://www.genecards.org/cgi-bin/carddisp.pl?gene=ABCC9
FLVCR2	FLVCR Choline And Putative Heme Transporter 2	Protein Coding	Q9UPI3	52	GC14P075578	14.865	https://www.genecards.org/cgi-bin/carddisp.pl?gene=FLVCR2
CDKN2B-AS1	CDKN2B Antisense RNA 1	RNA Gene		33	GC09P021994	14.8621	https://www.genecards.org/cgi-bin/carddisp.pl?gene=CDKN2B-AS1
NPAP1	Nuclear Pore Associated Protein 1	Protein Coding	Q9NZP6	43	GC15P024675	14.8611	https://www.genecards.org/cgi-bin/carddisp.pl?gene=NPAP1
H3-3B	H3.3 Histone B	Protein Coding	P84243	51	GC17M086231	14.8581	https://www.genecards.org/cgi-bin/carddisp.pl?gene=H3-3B
MIR145	MicroRNA 145	RNA Gene		32	GC05P149430	14.8573	https://www.genecards.org/cgi-bin/carddisp.pl?gene=MIR145
NECAP1	NECAP Endocytosis Associated 1	Protein Coding	Q8NC96	51	GC12P042161	14.8517	https://www.genecards.org/cgi-bin/carddisp.pl?gene=NECAP1
SHROOM4	Shroom Family Member 4	Protein Coding	Q9ULL8	49	GC0XM050576	14.8484	https://www.genecards.org/cgi-bin/carddisp.pl?gene=SHROOM4
ADORA2A	Adenosine A2a Receptor	Protein Coding	P29274	60	GC22P024417	14.8467	https://www.genecards.org/cgi-bin/carddisp.pl?gene=ADORA2A
TMEM67	Transmembrane Protein 67	Protein Coding	Q5HYA8	53	GC08P093754	14.843	https://www.genecards.org/cgi-bin/carddisp.pl?gene=TMEM67
ARMC9	Armadillo Repeat Containing 9	Protein Coding	Q7Z3E5	51	GC02P231198	14.8422	https://www.genecards.org/cgi-bin/carddisp.pl?gene=ARMC9
FANCC	FA Complementation Group C	Protein Coding	Q00597	60	GC09M095099	14.8417	https://www.genecards.org/cgi-bin/carddisp.pl?gene=FANCC
TCTN2	Tectonic Family Member 2	Protein Coding	Q96GX1	52	GC12P123671	14.835	https://www.genecards.org/cgi-bin/carddisp.pl?gene=TCTN2
LIG4	DNA Ligase 4	Protein Coding	P49917	60	GC13M108207	14.8321	https://www.genecards.org/cgi-bin/carddisp.pl?gene=LIG4
SETBP1	SET Binding Protein 1	Protein Coding	Q9Y6X0	54	GC18P044680	14.8279	https://www.genecards.org/cgi-bin/carddisp.pl?gene=SETBP1
MB	Myoglobin	Protein Coding	P02144	58	GC22M035606	14.8185	https://www.genecards.org/cgi-bin/carddisp.pl?gene=MB
ASH1L	ASH1 Like Histone Lysine Methyltransferase	Protein Coding	Q9NR48	52	GC01M155335	14.8184	https://www.genecards.org/cgi-bin/carddisp.pl?gene=ASH1L
ELN	Elastin	Protein Coding	P15502	56	GC07P074027	14.8125	https://www.genecards.org/cgi-bin/carddisp.pl?gene=ELN
CCR5	C-C Motif Chemokine Receptor 5	Protein Coding	P51681	60	GC03P059720	14.7954	https://www.genecards.org/cgi-bin/carddisp.pl?gene=CCR5
DPYS	Dihydropyrimidinase	Protein Coding	Q14117	58	GC08M104331	14.7926	https://www.genecards.org/cgi-bin/carddisp.pl?gene=DPYS
NDUFS1	NADH:Ubiquinone Oxidoreductase Core Subunit S1	Protein Coding	P28331	58	GC02M206114	14.7919	https://www.genecards.org/cgi-bin/carddisp.pl?gene=NDUFS1
IL13	Interleukin 13	Protein Coding	P35225	57	GC05P132656	14.7864	https://www.genecards.org/cgi-bin/carddisp.pl?gene=IL13
GPC3	Glypican 3	Protein Coding	P51654	59	GC0XM133535	14.7834	https://www.genecards.org/cgi-bin/carddisp.pl?gene=GPC3
PRKCG	Protein Kinase C Gamma	Protein Coding	P05129	63	GC19P053879	14.7799	https://www.genecards.org/cgi-bin/carddisp.pl?gene=PRKCG
SOX5	SRY-Box Transcription Factor 5	Protein Coding	P35711	57	GC12M023529	14.778	https://www.genecards.org/cgi-bin/carddisp.pl?gene=SOX5
SETD5	SET Domain Containing 5	Protein Coding	Q9C0A6	50	GC03P022721	14.7759	https://www.genecards.org/cgi-bin/carddisp.pl?gene=SETD5
NRG1	Neuregulin 1	Protein Coding	Q02297	62	GC08P031639	14.774	https://www.genecards.org/cgi-bin/carddisp.pl?gene=NRG1
ASAH1	N-Acylsphingosine Amidohydrolase 1	Protein Coding	Q13510	62	GC08M018055	14.7688	https://www.genecards.org/cgi-bin/carddisp.pl?gene=ASAH1
MSX2	Msh Homeobox 2	Protein Coding	P35548	58	GC05P174724	14.7611	https://www.genecards.org/cgi-bin/carddisp.pl?gene=MSX2
SDHAF1	Succinate Dehydrogenase Complex Assembly Factor 1	Protein Coding	A6NFY7	48	GC19P035995	14.7569	https://www.genecards.org/cgi-bin/carddisp.pl?gene=SDHAF1
GRM5	Glutamate Metabotropic Receptor 5	Protein Coding	P41594	60	GC11M088504	14.755	https://www.genecards.org/cgi-bin/carddisp.pl?gene=GRM5
KIRREL3	Kirre Like Nephrin Family Adhesion Molecule 3	Protein Coding	Q8IZU9	56	GC11M126423	14.7474	https://www.genecards.org/cgi-bin/carddisp.pl?gene=KIRREL3
MIR221	MicroRNA 221	RNA Gene		29	GC0XM045746	14.7455	https://www.genecards.org/cgi-bin/carddisp.pl?gene=MIR221
GSTM1	Glutathione S-Transferase Mu 1	Protein Coding	P09488	55	GC01P109687	14.7427	https://www.genecards.org/cgi-bin/carddisp.pl?gene=GSTM1
ASXL3	ASXL Transcriptional Regulator 3	Protein Coding	Q9C0F0	47	GC18P033578	14.7393	https://www.genecards.org/cgi-bin/carddisp.pl?gene=ASXL3
RYR2	Ryanodine Receptor 2	Protein Coding	Q92736	60	GC01P237042	14.735	https://www.genecards.org/cgi-bin/carddisp.pl?gene=RYR2
IL12B	Interleukin 12B	Protein Coding	P29460	58	GC05M159314	14.7198	https://www.genecards.org/cgi-bin/carddisp.pl?gene=IL12B
FOXO1	Forkhead Box O1	Protein Coding	Q12778	64	GC13M040555	14.7187	https://www.genecards.org/cgi-bin/carddisp.pl?gene=FOXO1
SOX4	SRY-Box Transcription Factor 4	Protein Coding	Q06945	56	GC06P021593	14.7152	https://www.genecards.org/cgi-bin/carddisp.pl?gene=SOX4
MDH2	Malate Dehydrogenase 2	Protein Coding	P40926	60	GC07P076048	14.7148	https://www.genecards.org/cgi-bin/carddisp.pl?gene=MDH2
GNPTAB	N-Acetylglucosamine-1-Phosphate Transferase Subunits Alpha And Beta	Protein Coding	Q3T906	54	GC12M101745	14.7133	https://www.genecards.org/cgi-bin/carddisp.pl?gene=GNPTAB
NTRK3	Neurotrophic Receptor Tyrosine Kinase 3	Protein Coding	Q16288	66	GC15M087859	14.7088	https://www.genecards.org/cgi-bin/carddisp.pl?gene=NTRK3
PEX3	Peroxisomal Biogenesis Factor 3	Protein Coding	P56589	54	GC06P143450	14.7054	https://www.genecards.org/cgi-bin/carddisp.pl?gene=PEX3
PEX13	Peroxisomal Biogenesis Factor 13	Protein Coding	Q92968	52	GC02P061017	14.6939	https://www.genecards.org/cgi-bin/carddisp.pl?gene=PEX13
SLC37A4	Solute Carrier Family 37 Member 4	Protein Coding	O43826	54	GC11M130172	14.6834	https://www.genecards.org/cgi-bin/carddisp.pl?gene=SLC37A4
LAMA1	Laminin Subunit Alpha 1	Protein Coding	P25391	58	GC18M006941	14.6828	https://www.genecards.org/cgi-bin/carddisp.pl?gene=LAMA1
FGA	Fibrinogen Alpha Chain	Protein Coding	P02671	63	GC04M154583	14.6751	https://www.genecards.org/cgi-bin/carddisp.pl?gene=FGA
PIGO	Phosphatidylinositol Glycan Anchor Biosynthesis Class O	Protein Coding	Q8TEQ8	53	GC09M035404	14.6707	https://www.genecards.org/cgi-bin/carddisp.pl?gene=PIGO
AGK	Acylglycerol Kinase	Protein Coding	Q53H12	53	GC07P141551	14.668	https://www.genecards.org/cgi-bin/carddisp.pl?gene=AGK
KCND2	Potassium Voltage-Gated Channel Subfamily D Member 2	Protein Coding	Q9NZV8	56	GC07P120273	14.6621	https://www.genecards.org/cgi-bin/carddisp.pl?gene=KCND2
MAGI2	Membrane Associated Guanylate Kinase, WW And PDZ Domain Containing 2	Protein Coding	Q86UL8	55	GC07M078017	14.6564	https://www.genecards.org/cgi-bin/carddisp.pl?gene=MAGI2
DGUOK	Deoxyguanosine Kinase	Protein Coding	Q16854	56	GC02P073926	14.6445	https://www.genecards.org/cgi-bin/carddisp.pl?gene=DGUOK
OPA3	Outer Mitochondrial Membrane Lipid Metabolism Regulator OPA3	Protein Coding	Q9H6K4	51	GC19M045527	14.6377	https://www.genecards.org/cgi-bin/carddisp.pl?gene=OPA3
PRKRA	Protein Activator Of Interferon Induced Protein Kinase EIF2AK2	Protein Coding	O75569	55	GC02M178431	14.6368	https://www.genecards.org/cgi-bin/carddisp.pl?gene=PRKRA
PPARA	Peroxisome Proliferator Activated Receptor Alpha	Protein Coding	Q07869	58	GC22P046150	14.6347	https://www.genecards.org/cgi-bin/carddisp.pl?gene=PPARA
MT-CO3	Mitochondrially Encoded Cytochrome C Oxidase III	Protein Coding	P00414	41	GCMTP009209	14.6339	https://www.genecards.org/cgi-bin/carddisp.pl?gene=MT-CO3
UBE2A	Ubiquitin Conjugating Enzyme E2 A	Protein Coding	P49459	58	GC0XP120188	14.6323	https://www.genecards.org/cgi-bin/carddisp.pl?gene=UBE2A
TTC19	Tetratricopeptide Repeat Domain 19	Protein Coding	Q6DKK2	51	GC17P015999	14.6299	https://www.genecards.org/cgi-bin/carddisp.pl?gene=TTC19
SCP2	Sterol Carrier Protein 2	Protein Coding	P22307	58	GC01P052927	14.6287	https://www.genecards.org/cgi-bin/carddisp.pl?gene=SCP2
SLC2A3	Solute Carrier Family 2 Member 3	Protein Coding	P11169	61	GC12M007919	14.6245	https://www.genecards.org/cgi-bin/carddisp.pl?gene=SLC2A3
SST	Somatostatin	Protein Coding	P61278	53	GC03M187668	14.621	https://www.genecards.org/cgi-bin/carddisp.pl?gene=SST
KCNJ6	Potassium Inwardly Rectifying Channel Subfamily J Member 6	Protein Coding	P48051	59	GC21M037607	14.6055	https://www.genecards.org/cgi-bin/carddisp.pl?gene=KCNJ6
SRCAP	Snf2 Related CREBBP Activator Protein	Protein Coding	Q6ZRS2	52	GC16P096739	14.6043	https://www.genecards.org/cgi-bin/carddisp.pl?gene=SRCAP
AGTR1	Angiotensin II Receptor Type 1	Protein Coding	P30556	65	GC03P148697	14.6028	https://www.genecards.org/cgi-bin/carddisp.pl?gene=AGTR1
MT3	Metallothionein 3	Protein Coding	P25713	52	GC16P056589	14.6026	https://www.genecards.org/cgi-bin/carddisp.pl?gene=MT3
CEP120	Centrosomal Protein 120	Protein Coding	Q8N960	52	GC05M123344	14.6018	https://www.genecards.org/cgi-bin/carddisp.pl?gene=CEP120
FBXO7	F-Box Protein 7	Protein Coding	Q9Y3I1	56	GC22P032474	14.6	https://www.genecards.org/cgi-bin/carddisp.pl?gene=FBXO7
MMP3	Matrix Metallopeptidase 3	Protein Coding	P08254	63	GC11M102835	14.5984	https://www.genecards.org/cgi-bin/carddisp.pl?gene=MMP3
SLC25A3	Solute Carrier Family 25 Member 3	Protein Coding	Q00325	57	GC12P098593	14.5907	https://www.genecards.org/cgi-bin/carddisp.pl?gene=SLC25A3
ATP6V0A2	ATPase H+ Transporting V0 Subunit A2	Protein Coding	Q9Y487	56	GC12P123712	14.5889	https://www.genecards.org/cgi-bin/carddisp.pl?gene=ATP6V0A2
GLI1	GLI Family Zinc Finger 1	Protein Coding	P08151	60	GC12P062068	14.5876	https://www.genecards.org/cgi-bin/carddisp.pl?gene=GLI1
DDHD2	DDHD Domain Containing 2	Protein Coding	O94830	52	GC08P038225	14.584	https://www.genecards.org/cgi-bin/carddisp.pl?gene=DDHD2
UBB	Ubiquitin B	Protein Coding	P0CG47	57	GC17P016380	14.5736	https://www.genecards.org/cgi-bin/carddisp.pl?gene=UBB
WDR73	WD Repeat Domain 73	Protein Coding	Q6P4I2	49	GC15M084639	14.5708	https://www.genecards.org/cgi-bin/carddisp.pl?gene=WDR73
KCNQ1OT1	KCNQ1 Opposite Strand/Antisense Transcript 1	RNA Gene		36	GC11M012603	14.5665	https://www.genecards.org/cgi-bin/carddisp.pl?gene=KCNQ1OT1
PHACTR1	Phosphatase And Actin Regulator 1	Protein Coding	Q9C0D0	50	GC06P012717	14.5624	https://www.genecards.org/cgi-bin/carddisp.pl?gene=PHACTR1
EIF4G1	Eukaryotic Translation Initiation Factor 4 Gamma 1	Protein Coding	Q04637	60	GC03P184314	14.5563	https://www.genecards.org/cgi-bin/carddisp.pl?gene=EIF4G1
ACSL4	Acyl-CoA Synthetase Long Chain Family Member 4	Protein Coding	O60488	59	GC0XM109624	14.5547	https://www.genecards.org/cgi-bin/carddisp.pl?gene=ACSL4
FGF12	Fibroblast Growth Factor 12	Protein Coding	P61328	55	GC03M192139	14.5481	https://www.genecards.org/cgi-bin/carddisp.pl?gene=FGF12
VPS35	VPS35 Retromer Complex Component	Protein Coding	Q96QK1	55	GC16M047331	14.5442	https://www.genecards.org/cgi-bin/carddisp.pl?gene=VPS35
CTSF	Cathepsin F	Protein Coding	Q9UBX1	61	GC11M129073	14.528	https://www.genecards.org/cgi-bin/carddisp.pl?gene=CTSF
GJB1	Gap Junction Protein Beta 1	Protein Coding	P08034	60	GC0XP071212	14.5169	https://www.genecards.org/cgi-bin/carddisp.pl?gene=GJB1
COL4A2-AS1	COL4A2 Antisense RNA 1	RNA Gene		21	GC13M110502	14.5066	https://www.genecards.org/cgi-bin/carddisp.pl?gene=COL4A2-AS1
EXOSC8	Exosome Component 8	Protein Coding	Q96B26	54	GC13P036998	14.5048	https://www.genecards.org/cgi-bin/carddisp.pl?gene=EXOSC8
TIMP1	TIMP Metallopeptidase Inhibitor 1	Protein Coding	P01033	58	GC0XP058331	14.5022	https://www.genecards.org/cgi-bin/carddisp.pl?gene=TIMP1
KCNQ5	Potassium Voltage-Gated Channel Subfamily Q Member 5	Protein Coding	Q9NR82	55	GC06P072621	14.5015	https://www.genecards.org/cgi-bin/carddisp.pl?gene=KCNQ5
ELP2	Elongator Acetyltransferase Complex Subunit 2	Protein Coding	Q6IA86	50	GC18P036129	14.4976	https://www.genecards.org/cgi-bin/carddisp.pl?gene=ELP2
ALMS1	ALMS1 Centrosome And Basal Body Associated Protein	Protein Coding	Q8TCU4	52	GC02P073385	14.4874	https://www.genecards.org/cgi-bin/carddisp.pl?gene=ALMS1
HDAC8	Histone Deacetylase 8	Protein Coding	Q9BY41	61	GC0XM072329	14.4857	https://www.genecards.org/cgi-bin/carddisp.pl?gene=HDAC8
FBN1	Fibrillin 1	Protein Coding	P35555	60	GC15M048408	14.4763	https://www.genecards.org/cgi-bin/carddisp.pl?gene=FBN1
MBTPS2	Membrane Bound Transcription Factor Peptidase, Site 2	Protein Coding	O43462	54	GC0XP021839	14.4719	https://www.genecards.org/cgi-bin/carddisp.pl?gene=MBTPS2
MBOAT7	Membrane Bound O-Acyltransferase Domain Containing 7	Protein Coding	Q96N66	52	GC19M054173	14.4696	https://www.genecards.org/cgi-bin/carddisp.pl?gene=MBOAT7
BRAT1	BRCA1 Associated ATM Activator 1	Protein Coding	Q6PJG6	50	GC07M003582	14.46	https://www.genecards.org/cgi-bin/carddisp.pl?gene=BRAT1
MMADHC	Metabolism Of Cobalamin Associated D	Protein Coding	Q9H3L0	54	GC02M149569	14.4459	https://www.genecards.org/cgi-bin/carddisp.pl?gene=MMADHC
CHEK2	Checkpoint Kinase 2	Protein Coding	O96017	67	GC22M028687	14.4444	https://www.genecards.org/cgi-bin/carddisp.pl?gene=CHEK2
SON	SON DNA And RNA Binding Protein	Protein Coding	P18583	53	GC21P033542	14.4424	https://www.genecards.org/cgi-bin/carddisp.pl?gene=SON
RANBP2	RAN Binding Protein 2	Protein Coding	P49792	57	GC02P108719	14.4423	https://www.genecards.org/cgi-bin/carddisp.pl?gene=RANBP2
F10	Coagulation Factor X	Protein Coding	P00742	63	GC13P113122	14.4357	https://www.genecards.org/cgi-bin/carddisp.pl?gene=F10
TLR3	Toll Like Receptor 3	Protein Coding	O15455	64	GC04P186059	14.4342	https://www.genecards.org/cgi-bin/carddisp.pl?gene=TLR3
PHF8	PHD Finger Protein 8	Protein Coding	Q9UPP1	57	GC0XM053936	14.4263	https://www.genecards.org/cgi-bin/carddisp.pl?gene=PHF8
HNRNPU	Heterogeneous Nuclear Ribonucleoprotein U	Protein Coding	Q00839	56	GC01M244844	14.423	https://www.genecards.org/cgi-bin/carddisp.pl?gene=HNRNPU
SLC25A20	Solute Carrier Family 25 Member 20	Protein Coding	O43772	58	GC03M048949	14.4219	https://www.genecards.org/cgi-bin/carddisp.pl?gene=SLC25A20
POU1F1	POU Class 1 Homeobox 1	Protein Coding	P28069	54	GC03M087259	14.4109	https://www.genecards.org/cgi-bin/carddisp.pl?gene=POU1F1
NIPA1	NIPA Magnesium Transporter 1	Protein Coding	Q7RTP0	51	GC15P022773	14.4105	https://www.genecards.org/cgi-bin/carddisp.pl?gene=NIPA1
SP1	Sp1 Transcription Factor	Protein Coding	P08047	59	GC12P053380	14.4092	https://www.genecards.org/cgi-bin/carddisp.pl?gene=SP1
TNNT2	Troponin T2, Cardiac Type	Protein Coding	P45379	61	GC01M201359	14.4074	https://www.genecards.org/cgi-bin/carddisp.pl?gene=TNNT2
CILK1	Ciliogenesis Associated Kinase 1	Protein Coding	Q9UPZ9	55	GC06M097501	14.4015	https://www.genecards.org/cgi-bin/carddisp.pl?gene=CILK1
GRIP1	Glutamate Receptor Interacting Protein 1	Protein Coding	Q9Y3R0	56	GC12M066347	14.4004	https://www.genecards.org/cgi-bin/carddisp.pl?gene=GRIP1
EDNRB	Endothelin Receptor Type B	Protein Coding	P24530	63	GC13M077895	14.3952	https://www.genecards.org/cgi-bin/carddisp.pl?gene=EDNRB
RPIA	Ribose 5-Phosphate Isomerase A	Protein Coding	P49247	55	GC02P088691	14.3933	https://www.genecards.org/cgi-bin/carddisp.pl?gene=RPIA
GLRX5	Glutaredoxin 5	Protein Coding	Q86SX6	52	GC14P095533	14.3903	https://www.genecards.org/cgi-bin/carddisp.pl?gene=GLRX5
FLT1	Fms Related Receptor Tyrosine Kinase 1	Protein Coding	P17948	64	GC13M028300	14.3893	https://www.genecards.org/cgi-bin/carddisp.pl?gene=FLT1
EFHC1	EF-Hand Domain Containing 1	Protein Coding	Q5JVL4	53	GC06P052362	14.3872	https://www.genecards.org/cgi-bin/carddisp.pl?gene=EFHC1
PGAP2	Post-GPI Attachment To Proteins 2	Protein Coding	Q9UHJ9	47	GC11P003797	14.3858	https://www.genecards.org/cgi-bin/carddisp.pl?gene=PGAP2
PROC	Protein C, Inactivator Of Coagulation Factors Va And VIIIa	Protein Coding	P04070	64	GC02P127418	14.384	https://www.genecards.org/cgi-bin/carddisp.pl?gene=PROC
NPHP4	Nephrocystin 4	Protein Coding	O75161	52	GC01M015140	14.3837	https://www.genecards.org/cgi-bin/carddisp.pl?gene=NPHP4
SHANK2	SH3 And Multiple Ankyrin Repeat Domains 2	Protein Coding	Q9UPX8	54	GC11M070467	14.3823	https://www.genecards.org/cgi-bin/carddisp.pl?gene=SHANK2
CIT	Citron Rho-Interacting Serine/Threonine Kinase	Protein Coding	O14578	60	GC12M119687	14.3743	https://www.genecards.org/cgi-bin/carddisp.pl?gene=CIT
TTN	Titin	Protein Coding	Q8WZ42	60	GC02M178525	14.37	https://www.genecards.org/cgi-bin/carddisp.pl?gene=TTN
PSPH	Phosphoserine Phosphatase	Protein Coding	P78330	58	GC07M071061	14.366	https://www.genecards.org/cgi-bin/carddisp.pl?gene=PSPH
GTPBP3	GTP Binding Protein 3, Mitochondrial	Protein Coding	Q969Y2	53	GC19P122606	14.365	https://www.genecards.org/cgi-bin/carddisp.pl?gene=GTPBP3
LEPR	Leptin Receptor	Protein Coding	P48357	63	GC01P065444	14.3608	https://www.genecards.org/cgi-bin/carddisp.pl?gene=LEPR
CAMTA1	Calmodulin Binding Transcription Activator 1	Protein Coding	Q9Y6Y1	53	GC01P050868	14.3578	https://www.genecards.org/cgi-bin/carddisp.pl?gene=CAMTA1
PTF1A	Pancreas Associated Transcription Factor 1a	Protein Coding	Q7RTS3	54	GC10P023194	14.3505	https://www.genecards.org/cgi-bin/carddisp.pl?gene=PTF1A
NALCN	Sodium Leak Channel, Non-Selective	Protein Coding	Q8IZF0	53	GC13M101053	14.3484	https://www.genecards.org/cgi-bin/carddisp.pl?gene=NALCN
ERCC3	ERCC Excision Repair 3, TFIIH Core Complex Helicase Subunit	Protein Coding	P19447	59	GC02M127257	14.3463	https://www.genecards.org/cgi-bin/carddisp.pl?gene=ERCC3
PRSS12	Serine Protease 12	Protein Coding	P56730	56	GC04M118280	14.3454	https://www.genecards.org/cgi-bin/carddisp.pl?gene=PRSS12
LRPPRC	Leucine Rich Pentatricopeptide Repeat Containing	Protein Coding	P42704	55	GC02M043886	14.3389	https://www.genecards.org/cgi-bin/carddisp.pl?gene=LRPPRC
HCN4	Hyperpolarization Activated Cyclic Nucleotide Gated Potassium Channel 4	Protein Coding	Q9Y3Q4	60	GC15M073319	14.3369	https://www.genecards.org/cgi-bin/carddisp.pl?gene=HCN4
KIF1B	Kinesin Family Member 1B	Protein Coding	O60333	56	GC01P010210	14.3366	https://www.genecards.org/cgi-bin/carddisp.pl?gene=KIF1B
PTCHD1	Patched Domain Containing 1	Protein Coding	Q96NR3	48	GC0XP023334	14.3348	https://www.genecards.org/cgi-bin/carddisp.pl?gene=PTCHD1
KLF13	KLF Transcription Factor 13	Protein Coding	Q9Y2Y9	50	GC15P031326	14.3307	https://www.genecards.org/cgi-bin/carddisp.pl?gene=KLF13
UFM1	Ubiquitin Fold Modifier 1	Protein Coding	P61960	53	GC13P038349	14.3291	https://www.genecards.org/cgi-bin/carddisp.pl?gene=UFM1
CCL3	C-C Motif Chemokine Ligand 3	Protein Coding	P10147	54	GC17M036088	14.3279	https://www.genecards.org/cgi-bin/carddisp.pl?gene=CCL3
ANO10	Anoctamin 10	Protein Coding	Q9NW15	51	GC03M043355	14.3209	https://www.genecards.org/cgi-bin/carddisp.pl?gene=ANO10
ATP6V1A	ATPase H+ Transporting V1 Subunit A	Protein Coding	P38606	58	GC03P113786	14.3175	https://www.genecards.org/cgi-bin/carddisp.pl?gene=ATP6V1A
MEGF10	Multiple EGF Like Domains 10	Protein Coding	Q96KG7	55	GC05P127230	14.3115	https://www.genecards.org/cgi-bin/carddisp.pl?gene=MEGF10
HNRNPH2	Heterogeneous Nuclear Ribonucleoprotein H2	Protein Coding	P55795	52	GC0XP101408	14.3104	https://www.genecards.org/cgi-bin/carddisp.pl?gene=HNRNPH2
CEP135	Centrosomal Protein 135	Protein Coding	Q66GS9	51	GC04P055948	14.3101	https://www.genecards.org/cgi-bin/carddisp.pl?gene=CEP135
BMP7	Bone Morphogenetic Protein 7	Protein Coding	P18075	60	GC20M057168	14.3072	https://www.genecards.org/cgi-bin/carddisp.pl?gene=BMP7
STX11	Syntaxin 11	Protein Coding	O75558	54	GC06P146733	14.3027	https://www.genecards.org/cgi-bin/carddisp.pl?gene=STX11
SLC25A46	Solute Carrier Family 25 Member 46	Protein Coding	Q96AG3	51	GC05P110738	14.2993	https://www.genecards.org/cgi-bin/carddisp.pl?gene=SLC25A46
AGRN	Agrin	Protein Coding	O00468	58	GC01P001020	14.2974	https://www.genecards.org/cgi-bin/carddisp.pl?gene=AGRN
INTS11	Integrator Complex Subunit 11	Protein Coding	Q5TA45	50	GC01M015013	14.2917	https://www.genecards.org/cgi-bin/carddisp.pl?gene=INTS11
AP4B1	Adaptor Related Protein Complex 4 Subunit Beta 1	Protein Coding	Q9Y6B7	51	GC01M113894	14.2916	https://www.genecards.org/cgi-bin/carddisp.pl?gene=AP4B1
FOXRED1	FAD Dependent Oxidoreductase Domain Containing 1	Protein Coding	Q96CU9	53	GC11P126269	14.2873	https://www.genecards.org/cgi-bin/carddisp.pl?gene=FOXRED1
SLC7A5	Solute Carrier Family 7 Member 5	Protein Coding	Q01650	58	GC16M087830	14.2841	https://www.genecards.org/cgi-bin/carddisp.pl?gene=SLC7A5
NGLY1	N-Glycanase 1	Protein Coding	Q96IV0	55	GC03M025718	14.2806	https://www.genecards.org/cgi-bin/carddisp.pl?gene=NGLY1
MIR20A	MicroRNA 20a	RNA Gene		29	GC13P091699	14.2799	https://www.genecards.org/cgi-bin/carddisp.pl?gene=MIR20A
D2HGDH	D-2-Hydroxyglutarate Dehydrogenase	Protein Coding	Q8N465	56	GC02P241734	14.2791	https://www.genecards.org/cgi-bin/carddisp.pl?gene=D2HGDH
NBEA	Neurobeachin	Protein Coding	Q8NFP9	54	GC13P034942	14.2779	https://www.genecards.org/cgi-bin/carddisp.pl?gene=NBEA
SELE	Selectin E	Protein Coding	P16581	57	GC01M169722	14.2769	https://www.genecards.org/cgi-bin/carddisp.pl?gene=SELE
TAC3	Tachykinin Precursor 3	Protein Coding	Q9UHF0	55	GC12M059615	14.2739	https://www.genecards.org/cgi-bin/carddisp.pl?gene=TAC3
TNFSF11	TNF Superfamily Member 11	Protein Coding	O14788	62	GC13P042562	14.2672	https://www.genecards.org/cgi-bin/carddisp.pl?gene=TNFSF11
CNTN4	Contactin 4	Protein Coding	Q8IWV2	54	GC03P002117	14.2641	https://www.genecards.org/cgi-bin/carddisp.pl?gene=CNTN4
LARS2	Leucyl-TRNA Synthetase 2, Mitochondrial	Protein Coding	Q15031	57	GC03P059697	14.2624	https://www.genecards.org/cgi-bin/carddisp.pl?gene=LARS2
DOCK8	Dedicator Of Cytokinesis 8	Protein Coding	Q8NF50	58	GC09P000286	14.2606	https://www.genecards.org/cgi-bin/carddisp.pl?gene=DOCK8
RPL10	Ribosomal Protein L10	Protein Coding	P27635	56	GC0XP154389	14.2552	https://www.genecards.org/cgi-bin/carddisp.pl?gene=RPL10
SLC45A1	Solute Carrier Family 45 Member 1	Protein Coding	Q9Y2W3	45	GC01P050947	14.2477	https://www.genecards.org/cgi-bin/carddisp.pl?gene=SLC45A1
FADD	Fas Associated Via Death Domain	Protein Coding	Q13158	59	GC11P070203	14.2442	https://www.genecards.org/cgi-bin/carddisp.pl?gene=FADD
ITGA3	Integrin Subunit Alpha 3	Protein Coding	P26006	62	GC17P050055	14.2425	https://www.genecards.org/cgi-bin/carddisp.pl?gene=ITGA3
SLC6A19	Solute Carrier Family 6 Member 19	Protein Coding	Q695T7	56	GC05P001201	14.2395	https://www.genecards.org/cgi-bin/carddisp.pl?gene=SLC6A19
TNNI3	Troponin I3, Cardiac Type	Protein Coding	P19429	62	GC19M055151	14.2369	https://www.genecards.org/cgi-bin/carddisp.pl?gene=TNNI3
FBP1	Fructose-Bisphosphatase 1	Protein Coding	P09467	62	GC09M094603	14.2341	https://www.genecards.org/cgi-bin/carddisp.pl?gene=FBP1
LOC129998005	ATAC-STARR-Seq Lymphoblastoid Silent Region 17982	Functional Element		10	GC07P016484	14.2323	https://www.genecards.org/cgi-bin/carddisp.pl?gene=LOC129998005
MIR9-1	MicroRNA 9-1	RNA Gene		29	GC01M156420	14.2258	https://www.genecards.org/cgi-bin/carddisp.pl?gene=MIR9-1
TRNT1	TRNA Nucleotidyl Transferase 1	Protein Coding	Q96Q11	54	GC03P003126	14.2235	https://www.genecards.org/cgi-bin/carddisp.pl?gene=TRNT1
ECM1	Extracellular Matrix Protein 1	Protein Coding	Q16610	58	GC01P150508	14.2232	https://www.genecards.org/cgi-bin/carddisp.pl?gene=ECM1
CD34	CD34 Molecule	Protein Coding	P28906	58	GC01M207880	14.214	https://www.genecards.org/cgi-bin/carddisp.pl?gene=CD34
TBL1XR1	TBL1X/Y Related 1	Protein Coding	Q9BZK7	59	GC03M177019	14.2124	https://www.genecards.org/cgi-bin/carddisp.pl?gene=TBL1XR1
CX3CR1	C-X3-C Motif Chemokine Receptor 1	Protein Coding	P49238	56	GC03M039279	14.2117	https://www.genecards.org/cgi-bin/carddisp.pl?gene=CX3CR1
RBM8A	RNA Binding Motif Protein 8A	Protein Coding	Q9Y5S9	54	GC01M145921	14.2097	https://www.genecards.org/cgi-bin/carddisp.pl?gene=RBM8A
CNKSR2	Connector Enhancer Of Kinase Suppressor Of Ras 2	Protein Coding	Q8WXI2	54	GC0XP021372	14.2086	https://www.genecards.org/cgi-bin/carddisp.pl?gene=CNKSR2
CAMK2G	Calcium/Calmodulin Dependent Protein Kinase II Gamma	Protein Coding	Q13555	62	GC10M073812	14.201	https://www.genecards.org/cgi-bin/carddisp.pl?gene=CAMK2G
BCAN	Brevican	Protein Coding	Q96GW7	51	GC01P156641	14.1996	https://www.genecards.org/cgi-bin/carddisp.pl?gene=BCAN
RAD51	RAD51 Recombinase	Protein Coding	Q06609	63	GC15P040694	14.198	https://www.genecards.org/cgi-bin/carddisp.pl?gene=RAD51
CHD8	Chromodomain Helicase DNA Binding Protein 8	Protein Coding	Q9HCK8	55	GC14M021385	14.1958	https://www.genecards.org/cgi-bin/carddisp.pl?gene=CHD8
ALAD	Aminolevulinate Dehydratase	Protein Coding	P13716	59	GC09M113386	14.1929	https://www.genecards.org/cgi-bin/carddisp.pl?gene=ALAD
UPB1	Beta-Ureidopropionase 1	Protein Coding	Q9UBR1	58	GC22P024494	14.1923	https://www.genecards.org/cgi-bin/carddisp.pl?gene=UPB1
TWIST1	Twist Family BHLH Transcription Factor 1	Protein Coding	Q15672	59	GC07M019020	14.1788	https://www.genecards.org/cgi-bin/carddisp.pl?gene=TWIST1
RELA	RELA Proto-Oncogene, NF-KB Subunit	Protein Coding	Q04206	64	GC11M065653	14.1697	https://www.genecards.org/cgi-bin/carddisp.pl?gene=RELA
CKM	Creatine Kinase, M-Type	Protein Coding	P06732	57	GC19M045306	14.1605	https://www.genecards.org/cgi-bin/carddisp.pl?gene=CKM
MFF	Mitochondrial Fission Factor	Protein Coding	Q9GZY8	52	GC02P227325	14.156	https://www.genecards.org/cgi-bin/carddisp.pl?gene=MFF
TUSC3	Tumor Suppressor Candidate 3	Protein Coding	Q13454	54	GC08P015417	14.1556	https://www.genecards.org/cgi-bin/carddisp.pl?gene=TUSC3
CPOX	Coproporphyrinogen Oxidase	Protein Coding	P36551	57	GC03M098576	14.1538	https://www.genecards.org/cgi-bin/carddisp.pl?gene=CPOX
CHD3	Chromodomain Helicase DNA Binding Protein 3	Protein Coding	Q12873	57	GC17P121936	14.1397	https://www.genecards.org/cgi-bin/carddisp.pl?gene=CHD3
HACE1	HECT Domain And Ankyrin Repeat Containing E3 Ubiquitin Protein Ligase 1	Protein Coding	Q8IYU2	54	GC06M104728	14.1364	https://www.genecards.org/cgi-bin/carddisp.pl?gene=HACE1
TIMP2	TIMP Metallopeptidase Inhibitor 2	Protein Coding	P16035	54	GC17M078852	14.1353	https://www.genecards.org/cgi-bin/carddisp.pl?gene=TIMP2
SIRPA	Signal Regulatory Protein Alpha	Protein Coding	P78324	58	GC20P001894	14.1245	https://www.genecards.org/cgi-bin/carddisp.pl?gene=SIRPA
SNIP1	Smad Nuclear Interacting Protein 1	Protein Coding	Q8TAD8	54	GC01M037534	14.1233	https://www.genecards.org/cgi-bin/carddisp.pl?gene=SNIP1
HMBS	Hydroxymethylbilane Synthase	Protein Coding	P08397	58	GC11P119084	14.1192	https://www.genecards.org/cgi-bin/carddisp.pl?gene=HMBS
SAMD9	Sterile Alpha Motif Domain Containing 9	Protein Coding	Q5K651	49	GC07M093099	14.1179	https://www.genecards.org/cgi-bin/carddisp.pl?gene=SAMD9
TOE1	Target Of EGR1, Exonuclease	Protein Coding	Q96GM8	51	GC01P055476	14.1177	https://www.genecards.org/cgi-bin/carddisp.pl?gene=TOE1
AGA	Aspartylglucosaminidase	Protein Coding	P20933	59	GC04M177430	14.1162	https://www.genecards.org/cgi-bin/carddisp.pl?gene=AGA
BCKDHB	Branched Chain Keto Acid Dehydrogenase E1 Subunit Beta	Protein Coding	P21953	55	GC06P080106	14.1158	https://www.genecards.org/cgi-bin/carddisp.pl?gene=BCKDHB
IRF2BPL	Interferon Regulatory Factor 2 Binding Protein Like	Protein Coding	Q9H1B7	51	GC14M077024	14.1111	https://www.genecards.org/cgi-bin/carddisp.pl?gene=IRF2BPL
HAX1	HCLS1 Associated Protein X-1	Protein Coding	O00165	55	GC01P167203	14.1109	https://www.genecards.org/cgi-bin/carddisp.pl?gene=HAX1
PIGQ	Phosphatidylinositol Glycan Anchor Biosynthesis Class Q	Protein Coding	Q9BRB3	52	GC16P095742	14.1106	https://www.genecards.org/cgi-bin/carddisp.pl?gene=PIGQ
SLC9A9	Solute Carrier Family 9 Member A9	Protein Coding	Q8IVB4	50	GC03M143265	14.1075	https://www.genecards.org/cgi-bin/carddisp.pl?gene=SLC9A9
SPTBN1	Spectrin Beta, Non-Erythrocytic 1	Protein Coding	Q01082	56	GC02P054456	14.1066	https://www.genecards.org/cgi-bin/carddisp.pl?gene=SPTBN1
CYP2D6	Cytochrome P450 Family 2 Subfamily D Member 6	Protein Coding	P10635	60	GC22M042126	14.0994	https://www.genecards.org/cgi-bin/carddisp.pl?gene=CYP2D6
RAP1A	RAP1A, Member Of RAS Oncogene Family	Protein Coding	P62834	57	GC01P111542	14.0935	https://www.genecards.org/cgi-bin/carddisp.pl?gene=RAP1A
CCR1	C-C Motif Chemokine Receptor 1	Protein Coding	P32246	56	GC03M046218	14.0921	https://www.genecards.org/cgi-bin/carddisp.pl?gene=CCR1
RBFOX3	RNA Binding Fox-1 Homolog 3	Protein Coding	A6NFN3	50	GC17M079089	14.0903	https://www.genecards.org/cgi-bin/carddisp.pl?gene=RBFOX3
ZMYM3	Zinc Finger MYM-Type Containing 3	Protein Coding	Q14202	51	GC0XM071239	14.0864	https://www.genecards.org/cgi-bin/carddisp.pl?gene=ZMYM3
RUBCN	Rubicon Autophagy Regulator	Protein Coding	Q92622	52	GC03M199000	14.0853	https://www.genecards.org/cgi-bin/carddisp.pl?gene=RUBCN
CFTR	CF Transmembrane Conductance Regulator	Protein Coding	P13569	66	GC07P117287	14.0851	https://www.genecards.org/cgi-bin/carddisp.pl?gene=CFTR
TNC	Tenascin C	Protein Coding	P24821	63	GC09M115019	14.0806	https://www.genecards.org/cgi-bin/carddisp.pl?gene=TNC
TUBGCP6	Tubulin Gamma Complex Component 6	Protein Coding	Q96RT7	54	GC22M050217	14.078	https://www.genecards.org/cgi-bin/carddisp.pl?gene=TUBGCP6
TERC	Telomerase RNA Component	RNA Gene		39	GC03M169765	14.0761	https://www.genecards.org/cgi-bin/carddisp.pl?gene=TERC
BLTP1	Bridge-Like Lipid Transfer Protein Family Member 1	Protein Coding	Q2LD37	45	GC04P122154	14.0725	https://www.genecards.org/cgi-bin/carddisp.pl?gene=BLTP1
CUX2	Cut Like Homeobox 2	Protein Coding	O14529	53	GC12P111034	14.0591	https://www.genecards.org/cgi-bin/carddisp.pl?gene=CUX2
TAF2	TATA-Box Binding Protein Associated Factor 2	Protein Coding	Q6P1X5	52	GC08M119730	14.0587	https://www.genecards.org/cgi-bin/carddisp.pl?gene=TAF2
COL6A2	Collagen Type VI Alpha 2 Chain	Protein Coding	P12110	58	GC21P046098	14.0558	https://www.genecards.org/cgi-bin/carddisp.pl?gene=COL6A2
SHMT2	Serine Hydroxymethyltransferase 2	Protein Coding	P34897	59	GC12P057229	14.0428	https://www.genecards.org/cgi-bin/carddisp.pl?gene=SHMT2
KDM1A	Lysine Demethylase 1A	Protein Coding	O60341	62	GC01P023019	14.0409	https://www.genecards.org/cgi-bin/carddisp.pl?gene=KDM1A
EIF4E	Eukaryotic Translation Initiation Factor 4E	Protein Coding	P06730	62	GC04M098879	14.0409	https://www.genecards.org/cgi-bin/carddisp.pl?gene=EIF4E
MIR122	MicroRNA 122	RNA Gene		30	GC18P058451	14.0347	https://www.genecards.org/cgi-bin/carddisp.pl?gene=MIR122
TRIM32	Tripartite Motif Containing 32	Protein Coding	Q13049	55	GC09P116687	14.0335	https://www.genecards.org/cgi-bin/carddisp.pl?gene=TRIM32
GHRL	Ghrelin And Obestatin Prepropeptide	Protein Coding	Q9UBU3	55	GC03M010285	14.0307	https://www.genecards.org/cgi-bin/carddisp.pl?gene=GHRL
DOLK	Dolichol Kinase	Protein Coding	Q9UPQ8	51	GC09M128945	14.0276	https://www.genecards.org/cgi-bin/carddisp.pl?gene=DOLK
VARS2	Valyl-TRNA Synthetase 2, Mitochondrial	Protein Coding	Q5ST30	54	GC06P144746	14.0256	https://www.genecards.org/cgi-bin/carddisp.pl?gene=VARS2
CASP1	Caspase 1	Protein Coding	P29466	62	GC11M105025	14.025	https://www.genecards.org/cgi-bin/carddisp.pl?gene=CASP1
TMEM165	Transmembrane Protein 165	Protein Coding	Q9HC07	52	GC04P055395	14.0242	https://www.genecards.org/cgi-bin/carddisp.pl?gene=TMEM165
USP9X	Ubiquitin Specific Peptidase 9 X-Linked	Protein Coding	Q93008	61	GC0XP041085	14.0203	https://www.genecards.org/cgi-bin/carddisp.pl?gene=USP9X
SASS6	SAS-6 Centriolar Assembly Protein	Protein Coding	Q6UVJ0	50	GC01M100083	14.0198	https://www.genecards.org/cgi-bin/carddisp.pl?gene=SASS6
AHSG	Alpha 2-HS Glycoprotein	Protein Coding	P02765	58	GC03P186658	14.0179	https://www.genecards.org/cgi-bin/carddisp.pl?gene=AHSG
KCTD17	Potassium Channel Tetramerization Domain Containing 17	Protein Coding	Q8N5Z5	52	GC22P037051	14.0123	https://www.genecards.org/cgi-bin/carddisp.pl?gene=KCTD17
FLII	FLII Actin Remodeling Protein	Protein Coding	Q13045	56	GC17M018244	14.0094	https://www.genecards.org/cgi-bin/carddisp.pl?gene=FLII
UNC13D	Unc-13 Homolog D	Protein Coding	Q70J99	56	GC17M075827	14.0084	https://www.genecards.org/cgi-bin/carddisp.pl?gene=UNC13D
THAP1	THAP Domain Containing 1	Protein Coding	Q9NVV9	51	GC08M042836	14.005	https://www.genecards.org/cgi-bin/carddisp.pl?gene=THAP1
PEX12	Peroxisomal Biogenesis Factor 12	Protein Coding	O00623	51	GC17M035574	14.0024	https://www.genecards.org/cgi-bin/carddisp.pl?gene=PEX12
CLTC	Clathrin Heavy Chain	Protein Coding	Q00610	58	GC17P059619	13.9885	https://www.genecards.org/cgi-bin/carddisp.pl?gene=CLTC
GRIN3A	Glutamate Ionotropic Receptor NMDA Type Subunit 3A	Protein Coding	Q8TCU5	51	GC09M101569	13.987	https://www.genecards.org/cgi-bin/carddisp.pl?gene=GRIN3A
NDUFAF4	NADH:Ubiquinone Oxidoreductase Complex Assembly Factor 4	Protein Coding	Q9P032	55	GC06M096889	13.9861	https://www.genecards.org/cgi-bin/carddisp.pl?gene=NDUFAF4
MIR23A	MicroRNA 23a	RNA Gene		30	GC19M096312	13.9848	https://www.genecards.org/cgi-bin/carddisp.pl?gene=MIR23A
OGT	O-Linked N-Acetylglucosamine (GlcNAc) Transferase	Protein Coding	O15294	59	GC0XP071800	13.9786	https://www.genecards.org/cgi-bin/carddisp.pl?gene=OGT
GOSR2	Golgi SNAP Receptor Complex Member 2	Protein Coding	O14653	55	GC17P123231	13.9744	https://www.genecards.org/cgi-bin/carddisp.pl?gene=GOSR2
NDUFS2	NADH:Ubiquinone Oxidoreductase Core Subunit S2	Protein Coding	O75306	57	GC01P161197	13.9744	https://www.genecards.org/cgi-bin/carddisp.pl?gene=NDUFS2
CDH11	Cadherin 11	Protein Coding	P55287	60	GC16M064943	13.9688	https://www.genecards.org/cgi-bin/carddisp.pl?gene=CDH11
SLC46A1	Solute Carrier Family 46 Member 1	Protein Coding	Q96NT5	55	GC17M084697	13.9664	https://www.genecards.org/cgi-bin/carddisp.pl?gene=SLC46A1
TMEM63A	Transmembrane Protein 63A	Protein Coding	O94886	51	GC01M226877	13.9649	https://www.genecards.org/cgi-bin/carddisp.pl?gene=TMEM63A
ADARB1	Adenosine Deaminase RNA Specific B1	Protein Coding	P78563	58	GC21P045073	13.9626	https://www.genecards.org/cgi-bin/carddisp.pl?gene=ADARB1
ROBO3	Roundabout Guidance Receptor 3	Protein Coding	Q96MS0	56	GC11P124865	13.9615	https://www.genecards.org/cgi-bin/carddisp.pl?gene=ROBO3
ARF1	ADP Ribosylation Factor 1	Protein Coding	P84077	58	GC01P228082	13.9569	https://www.genecards.org/cgi-bin/carddisp.pl?gene=ARF1
HCCS	Holocytochrome C Synthase	Protein Coding	P53701	55	GC0XP011111	13.9537	https://www.genecards.org/cgi-bin/carddisp.pl?gene=HCCS
SLC33A1	Solute Carrier Family 33 Member 1	Protein Coding	O00400	55	GC03M155821	13.9458	https://www.genecards.org/cgi-bin/carddisp.pl?gene=SLC33A1
NDUFS8	NADH:Ubiquinone Oxidoreductase Core Subunit S8	Protein Coding	O00217	57	GC11P068030	13.9431	https://www.genecards.org/cgi-bin/carddisp.pl?gene=NDUFS8
VCAN	Versican	Protein Coding	P13611	60	GC05P083471	13.9372	https://www.genecards.org/cgi-bin/carddisp.pl?gene=VCAN
C5	Complement C5	Protein Coding	P01031	60	GC09M120933	13.9352	https://www.genecards.org/cgi-bin/carddisp.pl?gene=C5
GABRA6	Gamma-Aminobutyric Acid Type A Receptor Subunit Alpha6	Protein Coding	Q16445	58	GC05P161547	13.9351	https://www.genecards.org/cgi-bin/carddisp.pl?gene=GABRA6
RASA1	RAS P21 Protein Activator 1	Protein Coding	P20936	59	GC05P087267	13.9256	https://www.genecards.org/cgi-bin/carddisp.pl?gene=RASA1
COG2	Component Of Oligomeric Golgi Complex 2	Protein Coding	Q14746	52	GC01P230642	13.9227	https://www.genecards.org/cgi-bin/carddisp.pl?gene=COG2
PLK4	Polo Like Kinase 4	Protein Coding	O00444	60	GC04P127880	13.9201	https://www.genecards.org/cgi-bin/carddisp.pl?gene=PLK4
ELOVL4	ELOVL Fatty Acid Elongase 4	Protein Coding	Q9GZR5	58	GC06M079914	13.9174	https://www.genecards.org/cgi-bin/carddisp.pl?gene=ELOVL4
ERCC4	ERCC Excision Repair 4, Endonuclease Catalytic Subunit	Protein Coding	Q92889	58	GC16P013920	13.9116	https://www.genecards.org/cgi-bin/carddisp.pl?gene=ERCC4
KIAA0586	KIAA0586	Protein Coding	Q9BVV6	47	GC14P058427	13.9084	https://www.genecards.org/cgi-bin/carddisp.pl?gene=KIAA0586
MUC1	Mucin 1, Cell Surface Associated	Protein Coding	P15941	61	GC01M155185	13.9031	https://www.genecards.org/cgi-bin/carddisp.pl?gene=MUC1
PIGT	Phosphatidylinositol Glycan Anchor Biosynthesis Class T	Protein Coding	Q969N2	54	GC20P045416	13.9006	https://www.genecards.org/cgi-bin/carddisp.pl?gene=PIGT
SHOC2	SHOC2 Leucine Rich Repeat Scaffold Protein	Protein Coding	Q9UQ13	54	GC10P110919	13.8987	https://www.genecards.org/cgi-bin/carddisp.pl?gene=SHOC2
PRKCZ	Protein Kinase C Zeta	Protein Coding	Q05513	61	GC01P050679	13.8875	https://www.genecards.org/cgi-bin/carddisp.pl?gene=PRKCZ
DHDDS	Dehydrodolichyl Diphosphate Synthase Subunit	Protein Coding	Q86SQ9	54	GC01P026432	13.8836	https://www.genecards.org/cgi-bin/carddisp.pl?gene=DHDDS
RETREG1	Reticulophagy Regulator 1	Protein Coding	Q9H6L5	51	GC05M016591	13.8789	https://www.genecards.org/cgi-bin/carddisp.pl?gene=RETREG1
TPK1	Thiamin Pyrophosphokinase 1	Protein Coding	Q9H3S4	57	GC07M144451	13.8776	https://www.genecards.org/cgi-bin/carddisp.pl?gene=TPK1
HMGCR	3-Hydroxy-3-Methylglutaryl-CoA Reductase	Protein Coding	P04035	61	GC05P075336	13.8722	https://www.genecards.org/cgi-bin/carddisp.pl?gene=HMGCR
ARVCF	ARVCF Delta Catenin Family Member	Protein Coding	O00192	50	GC22M020204	13.8568	https://www.genecards.org/cgi-bin/carddisp.pl?gene=ARVCF
FTSJ1	FtsJ RNA 2'-O-Methyltransferase 1	Protein Coding	Q9UET6	54	GC0XP048476	13.8529	https://www.genecards.org/cgi-bin/carddisp.pl?gene=FTSJ1
MIR27A	MicroRNA 27a	RNA Gene		32	GC19M096311	13.8441	https://www.genecards.org/cgi-bin/carddisp.pl?gene=MIR27A
CHGA	Chromogranin A	Protein Coding	P10645	56	GC14P093363	13.8397	https://www.genecards.org/cgi-bin/carddisp.pl?gene=CHGA
PCDH12	Protocadherin 12	Protein Coding	Q9NPG4	52	GC05M141943	13.8351	https://www.genecards.org/cgi-bin/carddisp.pl?gene=PCDH12
XPNPEP3	X-Prolyl Aminopeptidase 3	Protein Coding	Q9NQH7	54	GC22P040857	13.8289	https://www.genecards.org/cgi-bin/carddisp.pl?gene=XPNPEP3
XPC	XPC Complex Subunit, DNA Damage Recognition And Repair Factor	Protein Coding	Q01831	59	GC03M026797	13.8197	https://www.genecards.org/cgi-bin/carddisp.pl?gene=XPC
NIN	Ninein	Protein Coding	Q8N4C6	55	GC14M050719	13.8188	https://www.genecards.org/cgi-bin/carddisp.pl?gene=NIN
KPTN	Kaptin, Actin Binding Protein	Protein Coding	Q9Y664	50	GC19M047475	13.818	https://www.genecards.org/cgi-bin/carddisp.pl?gene=KPTN
ADK	Adenosine Kinase	Protein Coding	P55263	63	GC10P074941	13.8168	https://www.genecards.org/cgi-bin/carddisp.pl?gene=ADK
ANKH	ANKH Inorganic Pyrophosphate Transport Regulator	Protein Coding	Q9HCJ1	52	GC05M014824	13.8165	https://www.genecards.org/cgi-bin/carddisp.pl?gene=ANKH
RBPJ	Recombination Signal Binding Protein For Immunoglobulin Kappa J Region	Protein Coding	Q06330	59	GC04P026105	13.8094	https://www.genecards.org/cgi-bin/carddisp.pl?gene=RBPJ
ANKRD11	Ankyrin Repeat Domain Containing 11	Protein Coding	Q6UB99	51	GC16M089267	13.8087	https://www.genecards.org/cgi-bin/carddisp.pl?gene=ANKRD11
DMBX1	Diencephalon/Mesencephalon Homeobox 1	Protein Coding	Q8NFW5	44	GC01P046489	13.807	https://www.genecards.org/cgi-bin/carddisp.pl?gene=DMBX1
COX10	Cytochrome C Oxidase Assembly Factor Heme A:Farnesyltransferase COX10	Protein Coding	Q12887	55	GC17P014069	13.8063	https://www.genecards.org/cgi-bin/carddisp.pl?gene=COX10
CEP104	Centrosomal Protein 104	Protein Coding	O60308	50	GC01M003812	13.8003	https://www.genecards.org/cgi-bin/carddisp.pl?gene=CEP104
TGFB3	Transforming Growth Factor Beta 3	Protein Coding	P10600	61	GC14M075958	13.7953	https://www.genecards.org/cgi-bin/carddisp.pl?gene=TGFB3
SDHAF2	Succinate Dehydrogenase Complex Assembly Factor 2	Protein Coding	Q9NX18	55	GC11P061430	13.7951	https://www.genecards.org/cgi-bin/carddisp.pl?gene=SDHAF2
ALG6	ALG6 Alpha-1,3-Glucosyltransferase	Protein Coding	Q9Y672	53	GC01P063367	13.7839	https://www.genecards.org/cgi-bin/carddisp.pl?gene=ALG6
CARS2	Cysteinyl-TRNA Synthetase 2, Mitochondrial	Protein Coding	Q9HA77	52	GC13M110641	13.7832	https://www.genecards.org/cgi-bin/carddisp.pl?gene=CARS2
OPRM1	Opioid Receptor Mu 1	Protein Coding	P35372	62	GC06P155971	13.7822	https://www.genecards.org/cgi-bin/carddisp.pl?gene=OPRM1
ST8SIA2	ST8 Alpha-N-Acetyl-Neuraminide Alpha-2,8-Sialyltransferase 2	Protein Coding	Q92186	54	GC15P092393	13.7817	https://www.genecards.org/cgi-bin/carddisp.pl?gene=ST8SIA2
SLC26A1	Solute Carrier Family 26 Member 1	Protein Coding	Q9H2B4	51	GC04M005234	13.7747	https://www.genecards.org/cgi-bin/carddisp.pl?gene=SLC26A1
MIR30A	MicroRNA 30a	RNA Gene		28	GC06M071403	13.7747	https://www.genecards.org/cgi-bin/carddisp.pl?gene=MIR30A
UMPS	Uridine Monophosphate Synthetase	Protein Coding	P11172	59	GC03P124730	13.7697	https://www.genecards.org/cgi-bin/carddisp.pl?gene=UMPS
TRPS1	Transcriptional Repressor GATA Binding 1	Protein Coding	Q9UHF7	57	GC08M115408	13.7679	https://www.genecards.org/cgi-bin/carddisp.pl?gene=TRPS1
NONO	Non-POU Domain Containing Octamer Binding	Protein Coding	Q15233	58	GC0XP071262	13.7659	https://www.genecards.org/cgi-bin/carddisp.pl?gene=NONO
GLRB	Glycine Receptor Beta	Protein Coding	P48167	59	GC04P157076	13.7521	https://www.genecards.org/cgi-bin/carddisp.pl?gene=GLRB
CTNNA1	Catenin Alpha 1	Protein Coding	P35221	59	GC05P138710	13.7493	https://www.genecards.org/cgi-bin/carddisp.pl?gene=CTNNA1
ALDH18A1	Aldehyde Dehydrogenase 18 Family Member A1	Protein Coding	P54886	58	GC10M095605	13.7477	https://www.genecards.org/cgi-bin/carddisp.pl?gene=ALDH18A1
DNM3	Dynamin 3	Protein Coding	Q9UQ16	56	GC01P171945	13.7466	https://www.genecards.org/cgi-bin/carddisp.pl?gene=DNM3
GK	Glycerol Kinase	Protein Coding	P32189	59	GC0XP031472	13.7434	https://www.genecards.org/cgi-bin/carddisp.pl?gene=GK
MTO1	Mitochondrial TRNA Translation Optimization 1	Protein Coding	Q9Y2Z2	56	GC06P073461	13.7419	https://www.genecards.org/cgi-bin/carddisp.pl?gene=MTO1
MIR34C	MicroRNA 34c	RNA Gene		31	GC11P112585	13.7377	https://www.genecards.org/cgi-bin/carddisp.pl?gene=MIR34C
DES	Desmin	Protein Coding	P17661	60	GC02P219418	13.7366	https://www.genecards.org/cgi-bin/carddisp.pl?gene=DES
PEX14	Peroxisomal Biogenesis Factor 14	Protein Coding	O75381	56	GC01P010472	13.7284	https://www.genecards.org/cgi-bin/carddisp.pl?gene=PEX14
SMS	Spermine Synthase	Protein Coding	P52788	57	GC0XP021958	13.7245	https://www.genecards.org/cgi-bin/carddisp.pl?gene=SMS
GALT	Galactose-1-Phosphate Uridylyltransferase	Protein Coding	P07902	59	GC09P058537	13.7181	https://www.genecards.org/cgi-bin/carddisp.pl?gene=GALT
DRD1	Dopamine Receptor D1	Protein Coding	P21728	58	GC05M175440	13.7179	https://www.genecards.org/cgi-bin/carddisp.pl?gene=DRD1
PPIL1	Peptidylprolyl Isomerase Like 1	Protein Coding	Q9Y3C6	55	GC06M036854	13.7178	https://www.genecards.org/cgi-bin/carddisp.pl?gene=PPIL1
BGLAP	Bone Gamma-Carboxyglutamate Protein	Protein Coding	P02818	53	GC01P156242	13.7163	https://www.genecards.org/cgi-bin/carddisp.pl?gene=BGLAP
PRDX1	Peroxiredoxin 1	Protein Coding	Q06830	62	GC01M045790	13.7073	https://www.genecards.org/cgi-bin/carddisp.pl?gene=PRDX1
IL1R1	Interleukin 1 Receptor Type 1	Protein Coding	P14778	60	GC02P102136	13.706	https://www.genecards.org/cgi-bin/carddisp.pl?gene=IL1R1
GABRA3	Gamma-Aminobutyric Acid Type A Receptor Subunit Alpha3	Protein Coding	P34903	59	GC0XM152166	13.7059	https://www.genecards.org/cgi-bin/carddisp.pl?gene=GABRA3
UBE3B	Ubiquitin Protein Ligase E3B	Protein Coding	Q7Z3V4	52	GC12P109477	13.7035	https://www.genecards.org/cgi-bin/carddisp.pl?gene=UBE3B
TMEM216	Transmembrane Protein 216	Protein Coding	Q9P0N5	47	GC11P093478	13.7013	https://www.genecards.org/cgi-bin/carddisp.pl?gene=TMEM216
CSNK2B	Casein Kinase 2 Beta	Protein Coding	P67870	61	GC06P144767	13.7013	https://www.genecards.org/cgi-bin/carddisp.pl?gene=CSNK2B
STAMBP	STAM Binding Protein	Protein Coding	O95630	58	GC02P073828	13.696	https://www.genecards.org/cgi-bin/carddisp.pl?gene=STAMBP
FRMPD4	FERM And PDZ Domain Containing 4	Protein Coding	Q14CM0	50	GC0XP011822	13.6958	https://www.genecards.org/cgi-bin/carddisp.pl?gene=FRMPD4
SCO1	Synthesis Of Cytochrome C Oxidase 1	Protein Coding	O75880	58	GC17M010672	13.6957	https://www.genecards.org/cgi-bin/carddisp.pl?gene=SCO1
CC2D1A	Coiled-Coil And C2 Domain Containing 1A	Protein Coding	Q6P1N0	55	GC19P122495	13.6936	https://www.genecards.org/cgi-bin/carddisp.pl?gene=CC2D1A
ACTA2	Actin Alpha 2, Smooth Muscle	Protein Coding	P62736	60	GC10M088935	13.6935	https://www.genecards.org/cgi-bin/carddisp.pl?gene=ACTA2
CYP2C9	Cytochrome P450 Family 2 Subfamily C Member 9	Protein Coding	P11712	59	GC10P094938	13.6931	https://www.genecards.org/cgi-bin/carddisp.pl?gene=CYP2C9
SIN3A	SIN3 Transcription Regulator Family Member A	Protein Coding	Q96ST3	60	GC15M075369	13.6855	https://www.genecards.org/cgi-bin/carddisp.pl?gene=SIN3A
ATIC	5-Aminoimidazole-4-Carboxamide Ribonucleotide Formyltransferase/IMP Cyclohydrolase	Protein Coding	P31939	59	GC02P215311	13.6849	https://www.genecards.org/cgi-bin/carddisp.pl?gene=ATIC
BCKDHA	Branched Chain Keto Acid Dehydrogenase E1 Subunit Alpha	Protein Coding	P12694	56	GC19P123113	13.6841	https://www.genecards.org/cgi-bin/carddisp.pl?gene=BCKDHA
FGF14	Fibroblast Growth Factor 14	Protein Coding	Q92915	55	GC13M101710	13.6801	https://www.genecards.org/cgi-bin/carddisp.pl?gene=FGF14
COX15	Cytochrome C Oxidase Assembly Homolog COX15	Protein Coding	Q7KZN9	55	GC10M099696	13.6733	https://www.genecards.org/cgi-bin/carddisp.pl?gene=COX15
ERCC5	ERCC Excision Repair 5, Endonuclease	Protein Coding	P28715	58	GC13P102845	13.6727	https://www.genecards.org/cgi-bin/carddisp.pl?gene=ERCC5
ATAD3A	ATPase Family AAA Domain Containing 3A	Protein Coding	Q9NVI7	54	GC01P050655	13.6597	https://www.genecards.org/cgi-bin/carddisp.pl?gene=ATAD3A
MMP1	Matrix Metallopeptidase 1	Protein Coding	P03956	63	GC11M129720	13.656	https://www.genecards.org/cgi-bin/carddisp.pl?gene=MMP1
ADRA2B	Adrenoceptor Alpha 2B	Protein Coding	P18089	56	GC02M096112	13.6537	https://www.genecards.org/cgi-bin/carddisp.pl?gene=ADRA2B
CXCR2	C-X-C Motif Chemokine Receptor 2	Protein Coding	P25025	63	GC02P218125	13.6517	https://www.genecards.org/cgi-bin/carddisp.pl?gene=CXCR2
NEFH	Neurofilament Heavy Chain	Protein Coding	P12036	58	GC22P029480	13.6495	https://www.genecards.org/cgi-bin/carddisp.pl?gene=NEFH
PHC1	Polyhomeotic Homolog 1	Protein Coding	P78364	52	GC12P008913	13.6475	https://www.genecards.org/cgi-bin/carddisp.pl?gene=PHC1
TFAP2A	Transcription Factor AP-2 Alpha	Protein Coding	P05549	60	GC06M010393	13.6354	https://www.genecards.org/cgi-bin/carddisp.pl?gene=TFAP2A
TMEM70	Transmembrane Protein 70	Protein Coding	Q9BUB7	51	GC08P073972	13.6291	https://www.genecards.org/cgi-bin/carddisp.pl?gene=TMEM70
TNFRSF11B	TNF Receptor Superfamily Member 11b	Protein Coding	O00300	60	GC08M118923	13.6291	https://www.genecards.org/cgi-bin/carddisp.pl?gene=TNFRSF11B
INF2	Inverted Formin 2	Protein Coding	Q27J81	53	GC14P116977	13.6158	https://www.genecards.org/cgi-bin/carddisp.pl?gene=INF2
MYD88	MYD88 Innate Immune Signal Transduction Adaptor	Protein Coding	Q99836	62	GC03P038324	13.6075	https://www.genecards.org/cgi-bin/carddisp.pl?gene=MYD88
ALOX5	Arachidonate 5-Lipoxygenase	Protein Coding	P09917	62	GC10P045374	13.6039	https://www.genecards.org/cgi-bin/carddisp.pl?gene=ALOX5
NSUN2	NOP2/Sun RNA Methyltransferase 2	Protein Coding	Q08J23	56	GC05M006599	13.6028	https://www.genecards.org/cgi-bin/carddisp.pl?gene=NSUN2
CPLANE1	Ciliogenesis And Planar Polarity Effector Complex Subunit 1	Protein Coding	Q9H799	46	GC05M038497	13.5999	https://www.genecards.org/cgi-bin/carddisp.pl?gene=CPLANE1
WDR19	WD Repeat Domain 19	Protein Coding	Q8NEZ3	51	GC04P039184	13.5986	https://www.genecards.org/cgi-bin/carddisp.pl?gene=WDR19
ARHGEF6	Rac/Cdc42 Guanine Nucleotide Exchange Factor 6	Protein Coding	Q15052	56	GC0XM136665	13.5961	https://www.genecards.org/cgi-bin/carddisp.pl?gene=ARHGEF6
LHX1	LIM Homeobox 1	Protein Coding	P48742	53	GC17P122792	13.5939	https://www.genecards.org/cgi-bin/carddisp.pl?gene=LHX1
KATNIP	Katanin Interacting Protein	Protein Coding	O60303	45	GC16P096460	13.5939	https://www.genecards.org/cgi-bin/carddisp.pl?gene=KATNIP
LOC126806658	BRD4-Independent Group 4 Enhancer GRCh37_chr3:41265899-41267098	Functional Element		11	GC03P041224	13.5906	https://www.genecards.org/cgi-bin/carddisp.pl?gene=LOC126806658
UGP2	UDP-Glucose Pyrophosphorylase 2	Protein Coding	Q16851	56	GC02P063840	13.5856	https://www.genecards.org/cgi-bin/carddisp.pl?gene=UGP2
LRP4	LDL Receptor Related Protein 4	Protein Coding	O75096	56	GC11M128604	13.5853	https://www.genecards.org/cgi-bin/carddisp.pl?gene=LRP4
GNB5	G Protein Subunit Beta 5	Protein Coding	O14775	57	GC15M152664	13.585	https://www.genecards.org/cgi-bin/carddisp.pl?gene=GNB5
GABRG3	Gamma-Aminobutyric Acid Type A Receptor Subunit Gamma3	Protein Coding	Q99928	56	GC15P026971	13.5829	https://www.genecards.org/cgi-bin/carddisp.pl?gene=GABRG3
PRDM8	PR/SET Domain 8	Protein Coding	Q9NQV8	48	GC04P080183	13.5793	https://www.genecards.org/cgi-bin/carddisp.pl?gene=PRDM8
GNA11	G Protein Subunit Alpha 11	Protein Coding	P29992	60	GC19P003094	13.5775	https://www.genecards.org/cgi-bin/carddisp.pl?gene=GNA11
LOC110806262	Solute Carrier Family 6 Member 4 Gene Promoter	Functional Element		8	GC17P030235	13.5772	https://www.genecards.org/cgi-bin/carddisp.pl?gene=LOC110806262
NUS1	NUS1 Dehydrodolichyl Diphosphate Synthase Subunit	Protein Coding	Q96E22	51	GC06P117675	13.57	https://www.genecards.org/cgi-bin/carddisp.pl?gene=NUS1
ASNS	Asparagine Synthetase (Glutamine-Hydrolyzing)	Protein Coding	P08243	59	GC07M097854	13.5625	https://www.genecards.org/cgi-bin/carddisp.pl?gene=ASNS
PDSS2	Decaprenyl Diphosphate Synthase Subunit 2	Protein Coding	Q86YH6	54	GC06M107152	13.5562	https://www.genecards.org/cgi-bin/carddisp.pl?gene=PDSS2
NR4A1	Nuclear Receptor Subfamily 4 Group A Member 1	Protein Coding	P22736	60	GC12P052022	13.5548	https://www.genecards.org/cgi-bin/carddisp.pl?gene=NR4A1
TACR3	Tachykinin Receptor 3	Protein Coding	P29371	62	GC04M103586	13.5536	https://www.genecards.org/cgi-bin/carddisp.pl?gene=TACR3
ASL	Argininosuccinate Lyase	Protein Coding	P04424	57	GC07P066075	13.5498	https://www.genecards.org/cgi-bin/carddisp.pl?gene=ASL
CTSK	Cathepsin K	Protein Coding	P43235	63	GC01M163792	13.5433	https://www.genecards.org/cgi-bin/carddisp.pl?gene=CTSK
SMARCC2	SWI/SNF Related, Matrix Associated, Actin Dependent Regulator Of Chromatin Subfamily C Member 2	Protein Coding	Q8TAQ2	57	GC12M059557	13.5425	https://www.genecards.org/cgi-bin/carddisp.pl?gene=SMARCC2
TSHR	Thyroid Stimulating Hormone Receptor	Protein Coding	P16473	61	GC14P080954	13.5377	https://www.genecards.org/cgi-bin/carddisp.pl?gene=TSHR
PNPT1	Polyribonucleotide Nucleotidyltransferase 1	Protein Coding	Q8TCS8	56	GC02M055634	13.5351	https://www.genecards.org/cgi-bin/carddisp.pl?gene=PNPT1
GCG	Glucagon	Protein Coding	P01275	55	GC02M162142	13.53	https://www.genecards.org/cgi-bin/carddisp.pl?gene=GCG
ATPAF2	ATP Synthase Mitochondrial F1 Complex Assembly Factor 2	Protein Coding	Q8N5M1	51	GC17M017977	13.5283	https://www.genecards.org/cgi-bin/carddisp.pl?gene=ATPAF2
ATP2B3	ATPase Plasma Membrane Ca2+ Transporting 3	Protein Coding	Q16720	58	GC0XP153517	13.5265	https://www.genecards.org/cgi-bin/carddisp.pl?gene=ATP2B3
OPTN	Optineurin	Protein Coding	Q96CV9	56	GC10P013099	13.5201	https://www.genecards.org/cgi-bin/carddisp.pl?gene=OPTN
LMX1B	LIM Homeobox Transcription Factor 1 Beta	Protein Coding	O60663	56	GC09P143337	13.518	https://www.genecards.org/cgi-bin/carddisp.pl?gene=LMX1B
NFU1	NFU1 Iron-Sulfur Cluster Scaffold	Protein Coding	Q9UMS0	55	GC02M069395	13.5172	https://www.genecards.org/cgi-bin/carddisp.pl?gene=NFU1
ALDOB	Aldolase, Fructose-Bisphosphate B	Protein Coding	P05062	59	GC09M101420	13.5172	https://www.genecards.org/cgi-bin/carddisp.pl?gene=ALDOB
MIR326	MicroRNA 326	RNA Gene		30	GC11M075335	13.515	https://www.genecards.org/cgi-bin/carddisp.pl?gene=MIR326
UBA5	Ubiquitin Like Modifier Activating Enzyme 5	Protein Coding	Q9GZZ9	52	GC03P132654	13.5135	https://www.genecards.org/cgi-bin/carddisp.pl?gene=UBA5
HNRNPL	Heterogeneous Nuclear Ribonucleoprotein L	Protein Coding	P14866	52	GC19M038836	13.507	https://www.genecards.org/cgi-bin/carddisp.pl?gene=HNRNPL
ATP6AP1	ATPase H+ Transporting Accessory Protein 1	Protein Coding	Q15904	57	GC0XP154428	13.5061	https://www.genecards.org/cgi-bin/carddisp.pl?gene=ATP6AP1
GH1	Growth Hormone 1	Protein Coding	P01241	56	GC17M063917	13.5057	https://www.genecards.org/cgi-bin/carddisp.pl?gene=GH1
TACO1	Translational Activator Of Cytochrome C Oxidase I	Protein Coding	Q9BSH4	52	GC17P063600	13.5057	https://www.genecards.org/cgi-bin/carddisp.pl?gene=TACO1
KAT6A	Lysine Acetyltransferase 6A	Protein Coding	Q92794	58	GC08M041929	13.4994	https://www.genecards.org/cgi-bin/carddisp.pl?gene=KAT6A
SMCHD1	Structural Maintenance Of Chromosomes Flexible Hinge Domain Containing 1	Protein Coding	A6NHR9	53	GC18P002655	13.4981	https://www.genecards.org/cgi-bin/carddisp.pl?gene=SMCHD1
OSGEP	O-Sialoglycoprotein Endopeptidase	Protein Coding	Q9NPF4	54	GC14M020446	13.4972	https://www.genecards.org/cgi-bin/carddisp.pl?gene=OSGEP
MYORG	Myogenesis Regulating Glycosidase (Putative)	Protein Coding	Q6NSJ0	48	GC09M034366	13.4933	https://www.genecards.org/cgi-bin/carddisp.pl?gene=MYORG
SLC25A19	Solute Carrier Family 25 Member 19	Protein Coding	Q9HC21	56	GC17M086214	13.4833	https://www.genecards.org/cgi-bin/carddisp.pl?gene=SLC25A19
MIR199A1	MicroRNA 199a-1	RNA Gene		28	GC19M010817	13.4792	https://www.genecards.org/cgi-bin/carddisp.pl?gene=MIR199A1
ITGB2	Integrin Subunit Beta 2	Protein Coding	P05107	63	GC21M044885	13.4792	https://www.genecards.org/cgi-bin/carddisp.pl?gene=ITGB2
PET100	PET100 Cytochrome C Oxidase Chaperone	Protein Coding	P0DJ07	41	GC19P122129	13.478	https://www.genecards.org/cgi-bin/carddisp.pl?gene=PET100
GSN	Gelsolin	Protein Coding	P06396	62	GC09P121201	13.468	https://www.genecards.org/cgi-bin/carddisp.pl?gene=GSN
SCN3B	Sodium Voltage-Gated Channel Beta Subunit 3	Protein Coding	Q9NY72	58	GC11M123629	13.4608	https://www.genecards.org/cgi-bin/carddisp.pl?gene=SCN3B
PTK2B	Protein Tyrosine Kinase 2 Beta	Protein Coding	Q14289	63	GC08P027311	13.4507	https://www.genecards.org/cgi-bin/carddisp.pl?gene=PTK2B
F9	Coagulation Factor IX	Protein Coding	P00740	60	GC0XP139530	13.4468	https://www.genecards.org/cgi-bin/carddisp.pl?gene=F9
THY1	Thy-1 Cell Surface Antigen	Protein Coding	P04216	56	GC11M130208	13.4464	https://www.genecards.org/cgi-bin/carddisp.pl?gene=THY1
ETFB	Electron Transfer Flavoprotein Subunit Beta	Protein Coding	P38117	57	GC19M051345	13.4406	https://www.genecards.org/cgi-bin/carddisp.pl?gene=ETFB
TUFM	Tu Translation Elongation Factor, Mitochondrial	Protein Coding	P49411	57	GC16M044746	13.4364	https://www.genecards.org/cgi-bin/carddisp.pl?gene=TUFM
TAFAZZIN	Tafazzin, Phospholipid-Lysophospholipid Transacylase	Protein Coding	Q16635	54	GC0XP154881	13.4349	https://www.genecards.org/cgi-bin/carddisp.pl?gene=TAFAZZIN
NAGA	Alpha-N-Acetylgalactosaminidase	Protein Coding	P17050	58	GC22M042058	13.4347	https://www.genecards.org/cgi-bin/carddisp.pl?gene=NAGA
DLGAP2	DLG Associated Protein 2	Protein Coding	Q9P1A6	50	GC08P000771	13.4317	https://www.genecards.org/cgi-bin/carddisp.pl?gene=DLGAP2
IL3	Interleukin 3	Protein Coding	P08700	58	GC05P132060	13.4297	https://www.genecards.org/cgi-bin/carddisp.pl?gene=IL3
ACADSB	Acyl-CoA Dehydrogenase Short/Branched Chain	Protein Coding	P45954	57	GC10P123008	13.4261	https://www.genecards.org/cgi-bin/carddisp.pl?gene=ACADSB
RTEL1	Regulator Of Telomere Elongation Helicase 1	Protein Coding	Q9NZ71	54	GC20P067548	13.4191	https://www.genecards.org/cgi-bin/carddisp.pl?gene=RTEL1
ARV1	ARV1 Homolog, Fatty Acid Homeostasis Modulator	Protein Coding	Q9H2C2	47	GC01P230978	13.4187	https://www.genecards.org/cgi-bin/carddisp.pl?gene=ARV1
ZC4H2	Zinc Finger C4H2-Type Containing	Protein Coding	Q9NQZ6	50	GC0XM064915	13.4179	https://www.genecards.org/cgi-bin/carddisp.pl?gene=ZC4H2
NDUFA1	NADH:Ubiquinone Oxidoreductase Subunit A1	Protein Coding	O15239	56	GC0XP119871	13.4135	https://www.genecards.org/cgi-bin/carddisp.pl?gene=NDUFA1
FAM111A	FAM111 Trypsin Like Peptidase A	Protein Coding	Q96PZ2	50	GC11P059142	13.4073	https://www.genecards.org/cgi-bin/carddisp.pl?gene=FAM111A
CYP2U1	Cytochrome P450 Family 2 Subfamily U Member 1	Protein Coding	Q7Z449	55	GC04P107931	13.4052	https://www.genecards.org/cgi-bin/carddisp.pl?gene=CYP2U1
HDAC6	Histone Deacetylase 6	Protein Coding	Q9UBN7	66	GC0XP048801	13.4037	https://www.genecards.org/cgi-bin/carddisp.pl?gene=HDAC6
NDUFAF2	NADH:Ubiquinone Oxidoreductase Complex Assembly Factor 2	Protein Coding	Q8N183	54	GC05P060945	13.4023	https://www.genecards.org/cgi-bin/carddisp.pl?gene=NDUFAF2
CUX1	Cut Like Homeobox 1	Protein Coding	Q13948	58	GC07P101815	13.4016	https://www.genecards.org/cgi-bin/carddisp.pl?gene=CUX1
GSS	Glutathione Synthetase	Protein Coding	P48637	59	GC20M034928	13.401	https://www.genecards.org/cgi-bin/carddisp.pl?gene=GSS
GOT2	Glutamic-Oxaloacetic Transaminase 2	Protein Coding	P00505	60	GC16M058707	13.3998	https://www.genecards.org/cgi-bin/carddisp.pl?gene=GOT2
ADPRS	ADP-Ribosylserine Hydrolase	Protein Coding	Q9NX46	50	GC01P053858	13.3908	https://www.genecards.org/cgi-bin/carddisp.pl?gene=ADPRS
ZDHHC15	Zinc Finger DHHC-Type Palmitoyltransferase 15	Protein Coding	Q96MV8	51	GC0XM075368	13.3897	https://www.genecards.org/cgi-bin/carddisp.pl?gene=ZDHHC15
ERBB3	Erb-B2 Receptor Tyrosine Kinase 3	Protein Coding	P21860	67	GC12P061993	13.3819	https://www.genecards.org/cgi-bin/carddisp.pl?gene=ERBB3
FLNB	Filamin B	Protein Coding	O75369	60	GC03P058008	13.3798	https://www.genecards.org/cgi-bin/carddisp.pl?gene=FLNB
AR	Androgen Receptor	Protein Coding	P10275	64	GC0XP067544	13.3784	https://www.genecards.org/cgi-bin/carddisp.pl?gene=AR
AQP1	Aquaporin 1 (Colton Blood Group)	Protein Coding	P29972	60	GC07P030911	13.3772	https://www.genecards.org/cgi-bin/carddisp.pl?gene=AQP1
CD44	CD44 Molecule (IN Blood Group)	Protein Coding	P16070	62	GC11P035139	13.3733	https://www.genecards.org/cgi-bin/carddisp.pl?gene=CD44
MIR18A	MicroRNA 18a	RNA Gene		28	GC13P091701	13.3729	https://www.genecards.org/cgi-bin/carddisp.pl?gene=MIR18A
FLRT3	Fibronectin Leucine Rich Transmembrane Protein 3	Protein Coding	Q9NZU0	58	GC20M014322	13.3704	https://www.genecards.org/cgi-bin/carddisp.pl?gene=FLRT3
CEP63	Centrosomal Protein 63	Protein Coding	Q96MT8	53	GC03P134485	13.3602	https://www.genecards.org/cgi-bin/carddisp.pl?gene=CEP63
PPOX	Protoporphyrinogen Oxidase	Protein Coding	P50336	56	GC01P167678	13.3595	https://www.genecards.org/cgi-bin/carddisp.pl?gene=PPOX
NPHP3	Nephrocystin 3	Protein Coding	Q7Z494	51	GC03M132683	13.3592	https://www.genecards.org/cgi-bin/carddisp.pl?gene=NPHP3
PNP	Purine Nucleoside Phosphorylase	Protein Coding	P00491	62	GC14P047738	13.3591	https://www.genecards.org/cgi-bin/carddisp.pl?gene=PNP
NDUFA10	NADH:Ubiquinone Oxidoreductase Subunit A10	Protein Coding	O95299	55	GC02M239893	13.3588	https://www.genecards.org/cgi-bin/carddisp.pl?gene=NDUFA10
TRA-TGC7-1	TRNA-Ala (Anticodon TGC) 7-1	RNA Gene		15	GC06M096896	13.346	https://www.genecards.org/cgi-bin/carddisp.pl?gene=TRA-TGC7-1
AVPR2	Arginine Vasopressin Receptor 2	Protein Coding	P30518	59	GC0XP153902	13.3442	https://www.genecards.org/cgi-bin/carddisp.pl?gene=AVPR2
EDC3	Enhancer Of MRNA Decapping 3	Protein Coding	Q96F86	54	GC15M151869	13.3402	https://www.genecards.org/cgi-bin/carddisp.pl?gene=EDC3
CHD4	Chromodomain Helicase DNA Binding Protein 4	Protein Coding	Q14839	58	GC12M006570	13.3337	https://www.genecards.org/cgi-bin/carddisp.pl?gene=CHD4
MAP4K4	Mitogen-Activated Protein Kinase Kinase Kinase Kinase 4	Protein Coding	O95819	59	GC02P101696	13.307	https://www.genecards.org/cgi-bin/carddisp.pl?gene=MAP4K4
HYLS1	HYLS1 Centriolar And Ciliogenesis Associated	Protein Coding	Q96M11	50	GC11P125883	13.3016	https://www.genecards.org/cgi-bin/carddisp.pl?gene=HYLS1
MAPK8IP2	Mitogen-Activated Protein Kinase 8 Interacting Protein 2	Protein Coding	Q13387	47	GC22P050600	13.2961	https://www.genecards.org/cgi-bin/carddisp.pl?gene=MAPK8IP2
RBBP8	RB Binding Protein 8, Endonuclease	Protein Coding	Q99708	56	GC18P022798	13.2943	https://www.genecards.org/cgi-bin/carddisp.pl?gene=RBBP8
FAR1	Fatty Acyl-CoA Reductase 1	Protein Coding	Q8WVX9	54	GC11P013668	13.2922	https://www.genecards.org/cgi-bin/carddisp.pl?gene=FAR1
HTR3A	5-Hydroxytryptamine Receptor 3A	Protein Coding	P46098	58	GC11P113975	13.2918	https://www.genecards.org/cgi-bin/carddisp.pl?gene=HTR3A
CDH15	Cadherin 15	Protein Coding	P55291	58	GC16P089171	13.284	https://www.genecards.org/cgi-bin/carddisp.pl?gene=CDH15
PROP1	PROP Paired-Like Homeobox 1	Protein Coding	O75360	51	GC05M177992	13.2825	https://www.genecards.org/cgi-bin/carddisp.pl?gene=PROP1
ENTPD1	Ectonucleoside Triphosphate Diphosphohydrolase 1	Protein Coding	P49961	63	GC10P112752	13.2787	https://www.genecards.org/cgi-bin/carddisp.pl?gene=ENTPD1
TUBGCP4	Tubulin Gamma Complex Component 4	Protein Coding	Q9UGJ1	52	GC15P043369	13.2785	https://www.genecards.org/cgi-bin/carddisp.pl?gene=TUBGCP4
LIAS	Lipoic Acid Synthetase	Protein Coding	O43766	56	GC04P039547	13.2777	https://www.genecards.org/cgi-bin/carddisp.pl?gene=LIAS
SERPINA1	Serpin Family A Member 1	Protein Coding	P01009	62	GC14M094376	13.2769	https://www.genecards.org/cgi-bin/carddisp.pl?gene=SERPINA1
TEK	TEK Receptor Tyrosine Kinase	Protein Coding	Q02763	64	GC09P027109	13.2745	https://www.genecards.org/cgi-bin/carddisp.pl?gene=TEK
PVALB	Parvalbumin	Protein Coding	P20472	53	GC22M036800	13.2709	https://www.genecards.org/cgi-bin/carddisp.pl?gene=PVALB
NDUFAF6	NADH:Ubiquinone Oxidoreductase Complex Assembly Factor 6	Protein Coding	Q330K2	48	GC08P094895	13.2704	https://www.genecards.org/cgi-bin/carddisp.pl?gene=NDUFAF6
MIR324	MicroRNA 324	RNA Gene		30	GC17M007223	13.2702	https://www.genecards.org/cgi-bin/carddisp.pl?gene=MIR324
CA2	Carbonic Anhydrase 2	Protein Coding	P00918	64	GC08P085463	13.2606	https://www.genecards.org/cgi-bin/carddisp.pl?gene=CA2
SOS1	SOS Ras/Rac Guanine Nucleotide Exchange Factor 1	Protein Coding	Q07889	64	GC02M039300	13.2575	https://www.genecards.org/cgi-bin/carddisp.pl?gene=SOS1
NFKBIA	NFKB Inhibitor Alpha	Protein Coding	P25963	64	GC14M035401	13.2552	https://www.genecards.org/cgi-bin/carddisp.pl?gene=NFKBIA
PRKCD	Protein Kinase C Delta	Protein Coding	Q05655	66	GC03P053156	13.2548	https://www.genecards.org/cgi-bin/carddisp.pl?gene=PRKCD
HNRNPA1	Heterogeneous Nuclear Ribonucleoprotein A1	Protein Coding	P09651	60	GC12P054280	13.2538	https://www.genecards.org/cgi-bin/carddisp.pl?gene=HNRNPA1
SPRED1	Sprouty Related EVH1 Domain Containing 1	Protein Coding	Q7Z699	56	GC15P038252	13.2502	https://www.genecards.org/cgi-bin/carddisp.pl?gene=SPRED1
MIR494	MicroRNA 494	RNA Gene		26	GC14P117924	13.2386	https://www.genecards.org/cgi-bin/carddisp.pl?gene=MIR494
IFNA1	Interferon Alpha 1	Protein Coding	P01562	51	GC09P021798	13.2386	https://www.genecards.org/cgi-bin/carddisp.pl?gene=IFNA1
WDR26	WD Repeat Domain 26	Protein Coding	Q9H7D7	54	GC01M224385	13.2251	https://www.genecards.org/cgi-bin/carddisp.pl?gene=WDR26
ATXN3	Ataxin 3	Protein Coding	P54252	59	GC14M120874	13.2211	https://www.genecards.org/cgi-bin/carddisp.pl?gene=ATXN3
DLG2	Discs Large MAGUK Scaffold Protein 2	Protein Coding	Q15700	55	GC11M083455	13.2193	https://www.genecards.org/cgi-bin/carddisp.pl?gene=DLG2
NOTCH2	Notch Receptor 2	Protein Coding	Q04721	64	GC01M119911	13.2182	https://www.genecards.org/cgi-bin/carddisp.pl?gene=NOTCH2
ARL13B	ADP Ribosylation Factor Like GTPase 13B	Protein Coding	Q3SXY8	51	GC03P093980	13.2163	https://www.genecards.org/cgi-bin/carddisp.pl?gene=ARL13B
EPG5	Ectopic P-Granules 5 Autophagy Tethering Factor	Protein Coding	Q9HCE0	51	GC18M045800	13.2161	https://www.genecards.org/cgi-bin/carddisp.pl?gene=EPG5
MYOCD	Myocardin	Protein Coding	Q8IZQ8	55	GC17P012665	13.2157	https://www.genecards.org/cgi-bin/carddisp.pl?gene=MYOCD
ZBTB16	Zinc Finger And BTB Domain Containing 16	Protein Coding	Q05516	56	GC11P114059	13.215	https://www.genecards.org/cgi-bin/carddisp.pl?gene=ZBTB16
MRI1	Methylthioribose-1-Phosphate Isomerase 1	Protein Coding	Q9BV20	50	GC19P013764	13.215	https://www.genecards.org/cgi-bin/carddisp.pl?gene=MRI1
PHF6	PHD Finger Protein 6	Protein Coding	Q8IWS0	52	GC0XP134373	13.2148	https://www.genecards.org/cgi-bin/carddisp.pl?gene=PHF6
TG	Thyroglobulin	Protein Coding	P01266	58	GC08P132866	13.2136	https://www.genecards.org/cgi-bin/carddisp.pl?gene=TG
DHPS	Deoxyhypusine Synthase	Protein Coding	P49366	56	GC19M096269	13.2115	https://www.genecards.org/cgi-bin/carddisp.pl?gene=DHPS
DIS3L2	DIS3 Like 3'-5' Exoribonuclease 2	Protein Coding	Q8IYB7	55	GC02P231961	13.2092	https://www.genecards.org/cgi-bin/carddisp.pl?gene=DIS3L2
PDPN	Podoplanin	Protein Coding	Q86YL7	54	GC01P013583	13.2082	https://www.genecards.org/cgi-bin/carddisp.pl?gene=PDPN
LYST	Lysosomal Trafficking Regulator	Protein Coding	Q99698	51	GC01M235661	13.2017	https://www.genecards.org/cgi-bin/carddisp.pl?gene=LYST
HNRNPA2B1	Heterogeneous Nuclear Ribonucleoprotein A2/B1	Protein Coding	P22626	59	GC07M026174	13.199	https://www.genecards.org/cgi-bin/carddisp.pl?gene=HNRNPA2B1
NCDN	Neurochondrin	Protein Coding	Q9UBB6	50	GC01P035557	13.1985	https://www.genecards.org/cgi-bin/carddisp.pl?gene=NCDN
SCN10A	Sodium Voltage-Gated Channel Alpha Subunit 10	Protein Coding	Q9Y5Y9	62	GC03M038747	13.1965	https://www.genecards.org/cgi-bin/carddisp.pl?gene=SCN10A
CNPY3	Canopy FGF Signaling Regulator 3	Protein Coding	Q9BT09	53	GC06P144963	13.194	https://www.genecards.org/cgi-bin/carddisp.pl?gene=CNPY3
SLC4A4	Solute Carrier Family 4 Member 4	Protein Coding	Q9Y6R1	59	GC04P071063	13.1925	https://www.genecards.org/cgi-bin/carddisp.pl?gene=SLC4A4
CLCNKB	Chloride Voltage-Gated Channel Kb	Protein Coding	P51801	55	GC01P051565	13.1861	https://www.genecards.org/cgi-bin/carddisp.pl?gene=CLCNKB
UPF3B	UPF3B Regulator Of Nonsense Mediated MRNA Decay	Protein Coding	Q9BZI7	52	GC0XM119805	13.1854	https://www.genecards.org/cgi-bin/carddisp.pl?gene=UPF3B
TMEM231	Transmembrane Protein 231	Protein Coding	Q9H6L2	50	GC16M075536	13.1839	https://www.genecards.org/cgi-bin/carddisp.pl?gene=TMEM231
MITF	Melanocyte Inducing Transcription Factor	Protein Coding	O75030	61	GC03P069740	13.1833	https://www.genecards.org/cgi-bin/carddisp.pl?gene=MITF
NODAL	Nodal Growth Differentiation Factor	Protein Coding	Q96S42	55	GC10M070431	13.1817	https://www.genecards.org/cgi-bin/carddisp.pl?gene=NODAL
RAB27A	RAB27A, Member RAS Oncogene Family	Protein Coding	P51159	60	GC15M055202	13.1682	https://www.genecards.org/cgi-bin/carddisp.pl?gene=RAB27A
AVP	Arginine Vasopressin	Protein Coding	P01185	58	GC20M003082	13.1625	https://www.genecards.org/cgi-bin/carddisp.pl?gene=AVP
GFER	Growth Factor, Augmenter Of Liver Regeneration	Protein Coding	P55789	58	GC16P001984	13.1563	https://www.genecards.org/cgi-bin/carddisp.pl?gene=GFER
SLCO1C1	Solute Carrier Organic Anion Transporter Family Member 1C1	Protein Coding	Q9NYB5	53	GC12P020695	13.1562	https://www.genecards.org/cgi-bin/carddisp.pl?gene=SLCO1C1
DAB1	DAB Adaptor Protein 1	Protein Coding	O75553	55	GC01M056994	13.1553	https://www.genecards.org/cgi-bin/carddisp.pl?gene=DAB1
STXBP2	Syntaxin Binding Protein 2	Protein Coding	Q15833	57	GC19P122131	13.1545	https://www.genecards.org/cgi-bin/carddisp.pl?gene=STXBP2
NPPC	Natriuretic Peptide C	Protein Coding	P23582	54	GC02M231921	13.1517	https://www.genecards.org/cgi-bin/carddisp.pl?gene=NPPC
SGSH	N-Sulfoglucosamine Sulfohydrolase	Protein Coding	P51688	60	GC17M086382	13.1485	https://www.genecards.org/cgi-bin/carddisp.pl?gene=SGSH
FBXW7	F-Box And WD Repeat Domain Containing 7	Protein Coding	Q969H0	59	GC04M152321	13.1481	https://www.genecards.org/cgi-bin/carddisp.pl?gene=FBXW7
MIR486-1	MicroRNA 486-1	RNA Gene		28	GC08M041660	13.1479	https://www.genecards.org/cgi-bin/carddisp.pl?gene=MIR486-1
MORC2	MORC Family CW-Type Zinc Finger 2	Protein Coding	Q9Y6X9	52	GC22M030925	13.1432	https://www.genecards.org/cgi-bin/carddisp.pl?gene=MORC2
PPARGC1A	PPARG Coactivator 1 Alpha	Protein Coding	Q9UBK2	60	GC04M023755	13.1351	https://www.genecards.org/cgi-bin/carddisp.pl?gene=PPARGC1A
SC5D	Sterol-C5-Desaturase	Protein Coding	O75845	53	GC11P121292	13.1288	https://www.genecards.org/cgi-bin/carddisp.pl?gene=SC5D
UGDH	UDP-Glucose 6-Dehydrogenase	Protein Coding	O60701	58	GC04M039502	13.128	https://www.genecards.org/cgi-bin/carddisp.pl?gene=UGDH
DNM2	Dynamin 2	Protein Coding	P50570	63	GC19P010718	13.1227	https://www.genecards.org/cgi-bin/carddisp.pl?gene=DNM2
RALGAPA1	Ral GTPase Activating Protein Catalytic Subunit Alpha 1	Protein Coding	Q6GYQ0	54	GC14M035538	13.1189	https://www.genecards.org/cgi-bin/carddisp.pl?gene=RALGAPA1
COX5A	Cytochrome C Oxidase Subunit 5A	Protein Coding	P20674	56	GC15M074919	13.116	https://www.genecards.org/cgi-bin/carddisp.pl?gene=COX5A
KCNK9	Potassium Two Pore Domain Channel Subfamily K Member 9	Protein Coding	Q9NPC2	59	GC08M139585	13.1055	https://www.genecards.org/cgi-bin/carddisp.pl?gene=KCNK9
CDK19	Cyclin Dependent Kinase 19	Protein Coding	Q9BWU1	56	GC06M110609	13.1024	https://www.genecards.org/cgi-bin/carddisp.pl?gene=CDK19
MED23	Mediator Complex Subunit 23	Protein Coding	Q9ULK4	55	GC06M131573	13.0992	https://www.genecards.org/cgi-bin/carddisp.pl?gene=MED23
TGFBR1	Transforming Growth Factor Beta Receptor 1	Protein Coding	P36897	67	GC09P102398	13.0894	https://www.genecards.org/cgi-bin/carddisp.pl?gene=TGFBR1
ARHGAP31	Rho GTPase Activating Protein 31	Protein Coding	Q2M1Z3	54	GC03P119294	13.0879	https://www.genecards.org/cgi-bin/carddisp.pl?gene=ARHGAP31
DENND5A	DENN Domain Containing 5A	Protein Coding	Q6IQ26	52	GC11M012891	13.0859	https://www.genecards.org/cgi-bin/carddisp.pl?gene=DENND5A
RECQL4	RecQ Like Helicase 4	Protein Coding	O94761	53	GC08M146813	13.0833	https://www.genecards.org/cgi-bin/carddisp.pl?gene=RECQL4
STAR	Steroidogenic Acute Regulatory Protein	Protein Coding	P49675	58	GC08M038333	13.0828	https://www.genecards.org/cgi-bin/carddisp.pl?gene=STAR
FTCD	Formimidoyltransferase Cyclodeaminase	Protein Coding	O95954	54	GC21M053911	13.081	https://www.genecards.org/cgi-bin/carddisp.pl?gene=FTCD
SEMA6B	Semaphorin 6B	Protein Coding	Q9H3T3	49	GC19M004542	13.0742	https://www.genecards.org/cgi-bin/carddisp.pl?gene=SEMA6B
PGAP3	Post-GPI Attachment To Proteins Phospholipase 3	Protein Coding	Q96FM1	52	GC17M085117	13.0709	https://www.genecards.org/cgi-bin/carddisp.pl?gene=PGAP3
TAC1	Tachykinin Precursor 1	Protein Coding	P20366	53	GC07P097734	13.0672	https://www.genecards.org/cgi-bin/carddisp.pl?gene=TAC1
LARS1	Leucyl-TRNA Synthetase 1	Protein Coding	Q9P2J5	57	GC05M146114	13.0658	https://www.genecards.org/cgi-bin/carddisp.pl?gene=LARS1
FGF13	Fibroblast Growth Factor 13	Protein Coding	Q92913	55	GC0XM138615	13.0648	https://www.genecards.org/cgi-bin/carddisp.pl?gene=FGF13
KLHL15	Kelch Like Family Member 15	Protein Coding	Q96M94	51	GC0XM023983	13.0639	https://www.genecards.org/cgi-bin/carddisp.pl?gene=KLHL15
CLP1	Cleavage Factor Polyribonucleotide Kinase Subunit 1	Protein Coding	Q92989	54	GC11P057648	13.0638	https://www.genecards.org/cgi-bin/carddisp.pl?gene=CLP1
KIAA0753	KIAA0753	Protein Coding	Q2KHM9	47	GC17M006578	13.0634	https://www.genecards.org/cgi-bin/carddisp.pl?gene=KIAA0753
ESR2	Estrogen Receptor 2	Protein Coding	Q92731	61	GC14M064084	13.063	https://www.genecards.org/cgi-bin/carddisp.pl?gene=ESR2
PLXND1	Plexin D1	Protein Coding	Q9Y4D7	55	GC03M129555	13.063	https://www.genecards.org/cgi-bin/carddisp.pl?gene=PLXND1
MRPS22	Mitochondrial Ribosomal Protein S22	Protein Coding	P82650	54	GC03P139005	13.0541	https://www.genecards.org/cgi-bin/carddisp.pl?gene=MRPS22
CD8A	CD8 Subunit Alpha	Protein Coding	P01732	60	GC02M086784	13.0473	https://www.genecards.org/cgi-bin/carddisp.pl?gene=CD8A
TCTN3	Tectonic Family Member 3	Protein Coding	Q6NUS6	52	GC10M095663	13.0435	https://www.genecards.org/cgi-bin/carddisp.pl?gene=TCTN3
SNORD15A	Small Nucleolar RNA, C/D Box 15A	RNA Gene		24	GC11P075400	13.0328	https://www.genecards.org/cgi-bin/carddisp.pl?gene=SNORD15A
MYH7	Myosin Heavy Chain 7	Protein Coding	P12883	60	GC14M023412	13.0315	https://www.genecards.org/cgi-bin/carddisp.pl?gene=MYH7
MPI	Mannose Phosphate Isomerase	Protein Coding	P34949	57	GC15P074890	13.0314	https://www.genecards.org/cgi-bin/carddisp.pl?gene=MPI
ABCC2	ATP Binding Cassette Subfamily C Member 2	Protein Coding	Q92887	62	GC10P099782	13.0242	https://www.genecards.org/cgi-bin/carddisp.pl?gene=ABCC2
NDUFA13	NADH:Ubiquinone Oxidoreductase Subunit A13	Protein Coding	Q9P0J0	56	GC19P019515	13.0227	https://www.genecards.org/cgi-bin/carddisp.pl?gene=NDUFA13
B3GLCT	Beta 3-Glucosyltransferase	Protein Coding	Q6Y288	51	GC13P031215	13.0225	https://www.genecards.org/cgi-bin/carddisp.pl?gene=B3GLCT
RMRP	RNA Component Of Mitochondrial RNA Processing Endoribonuclease	RNA Gene		33	GC09M035655	13.0219	https://www.genecards.org/cgi-bin/carddisp.pl?gene=RMRP
BSN	Bassoon Presynaptic Cytomatrix Protein	Protein Coding	Q9UPA5	48	GC03P049554	13.0173	https://www.genecards.org/cgi-bin/carddisp.pl?gene=BSN
MTM1	Myotubularin 1	Protein Coding	Q13496	56	GC0XP150562	13.0095	https://www.genecards.org/cgi-bin/carddisp.pl?gene=MTM1
GLYCTK	Glycerate Kinase	Protein Coding	Q8IVS8	54	GC03P059983	13.0089	https://www.genecards.org/cgi-bin/carddisp.pl?gene=GLYCTK
SYN2	Synapsin II	Protein Coding	Q92777	52	GC03P022831	13.0032	https://www.genecards.org/cgi-bin/carddisp.pl?gene=SYN2
KCNJ13	Potassium Inwardly Rectifying Channel Subfamily J Member 13	Protein Coding	O60928	54	GC02M232765	12.9957	https://www.genecards.org/cgi-bin/carddisp.pl?gene=KCNJ13
GATA2	GATA Binding Protein 2	Protein Coding	P23769	62	GC03M128479	12.9773	https://www.genecards.org/cgi-bin/carddisp.pl?gene=GATA2
MPDU1	Mannose-P-Dolichol Utilization Defect 1	Protein Coding	O75352	55	GC17P007583	12.9773	https://www.genecards.org/cgi-bin/carddisp.pl?gene=MPDU1
TMEM138	Transmembrane Protein 138	Protein Coding	Q9NPI0	50	GC11P093480	12.9772	https://www.genecards.org/cgi-bin/carddisp.pl?gene=TMEM138
RUSC2	RUN And SH3 Domain Containing 2	Protein Coding	Q8N2Y8	51	GC09P035490	12.9725	https://www.genecards.org/cgi-bin/carddisp.pl?gene=RUSC2
DPYSL2	Dihydropyrimidinase Like 2	Protein Coding	Q16555	58	GC08P026514	12.9702	https://www.genecards.org/cgi-bin/carddisp.pl?gene=DPYSL2
MYH3	Myosin Heavy Chain 3	Protein Coding	P11055	57	GC17M010628	12.9682	https://www.genecards.org/cgi-bin/carddisp.pl?gene=MYH3
FXN	Frataxin	Protein Coding	Q16595	60	GC09P069035	12.9608	https://www.genecards.org/cgi-bin/carddisp.pl?gene=FXN
CDK10	Cyclin Dependent Kinase 10	Protein Coding	Q15131	58	GC16P089680	12.9596	https://www.genecards.org/cgi-bin/carddisp.pl?gene=CDK10
SLC19A2	Solute Carrier Family 19 Member 2	Protein Coding	O60779	58	GC01M169463	12.9581	https://www.genecards.org/cgi-bin/carddisp.pl?gene=SLC19A2
LONP1	Lon Peptidase 1, Mitochondrial	Protein Coding	P36776	58	GC19M005691	12.9567	https://www.genecards.org/cgi-bin/carddisp.pl?gene=LONP1
EXT2	Exostosin Glycosyltransferase 2	Protein Coding	Q93063	57	GC11P044095	12.9498	https://www.genecards.org/cgi-bin/carddisp.pl?gene=EXT2
NFASC	Neurofascin	Protein Coding	O94856	56	GC01P204828	12.9496	https://www.genecards.org/cgi-bin/carddisp.pl?gene=NFASC
NQO1	NAD(P)H Quinone Dehydrogenase 1	Protein Coding	P15559	60	GC16M069706	12.9486	https://www.genecards.org/cgi-bin/carddisp.pl?gene=NQO1
COLGALT1	Collagen Beta(1-O)Galactosyltransferase 1	Protein Coding	Q8NBJ5	51	GC19P017555	12.9412	https://www.genecards.org/cgi-bin/carddisp.pl?gene=COLGALT1
PIGG	Phosphatidylinositol Glycan Anchor Biosynthesis Class G (EMM Blood Group)	Protein Coding	Q5H8A4	51	GC04P004652	12.9406	https://www.genecards.org/cgi-bin/carddisp.pl?gene=PIGG
GUCY1A1	Guanylate Cyclase 1 Soluble Subunit Alpha 1	Protein Coding	Q02108	56	GC04P155667	12.9405	https://www.genecards.org/cgi-bin/carddisp.pl?gene=GUCY1A1
PIEZO2	Piezo Type Mechanosensitive Ion Channel Component 2	Protein Coding	Q9H5I5	50	GC18M010699	12.9279	https://www.genecards.org/cgi-bin/carddisp.pl?gene=PIEZO2
THBS1	Thrombospondin 1	Protein Coding	P07996	59	GC15P039581	12.9255	https://www.genecards.org/cgi-bin/carddisp.pl?gene=THBS1
CAMK4	Calcium/Calmodulin Dependent Protein Kinase IV	Protein Coding	Q16566	59	GC05P111223	12.9196	https://www.genecards.org/cgi-bin/carddisp.pl?gene=CAMK4
HPDL	4-Hydroxyphenylpyruvate Dioxygenase Like	Protein Coding	Q96IR7	47	GC01P045326	12.9121	https://www.genecards.org/cgi-bin/carddisp.pl?gene=HPDL
ASCL1	Achaete-Scute Family BHLH Transcription Factor 1	Protein Coding	P50553	55	GC12P102957	12.9113	https://www.genecards.org/cgi-bin/carddisp.pl?gene=ASCL1
DOCK6	Dedicator Of Cytokinesis 6	Protein Coding	Q96HP0	56	GC19M011199	12.9108	https://www.genecards.org/cgi-bin/carddisp.pl?gene=DOCK6
REPS1	RALBP1 Associated Eps Domain Containing 1	Protein Coding	Q96D71	50	GC06M138903	12.9038	https://www.genecards.org/cgi-bin/carddisp.pl?gene=REPS1
HLA-A	Major Histocompatibility Complex, Class I, A	Protein Coding	P04439	59	GC06P144720	12.9028	https://www.genecards.org/cgi-bin/carddisp.pl?gene=HLA-A
AASS	Aminoadipate-Semialdehyde Synthase	Protein Coding	Q9UDR5	54	GC07M122073	12.8954	https://www.genecards.org/cgi-bin/carddisp.pl?gene=AASS
ANG	Angiogenin	Protein Coding	P03950	58	GC14P047774	12.8949	https://www.genecards.org/cgi-bin/carddisp.pl?gene=ANG
CXCL2	C-X-C Motif Chemokine Ligand 2	Protein Coding	P19875	52	GC04M074097	12.8939	https://www.genecards.org/cgi-bin/carddisp.pl?gene=CXCL2
COG4	Component Of Oligomeric Golgi Complex 4	Protein Coding	Q9H9E3	52	GC16M073547	12.8883	https://www.genecards.org/cgi-bin/carddisp.pl?gene=COG4
CTSA	Cathepsin A	Protein Coding	P10619	60	GC20P045890	12.8876	https://www.genecards.org/cgi-bin/carddisp.pl?gene=CTSA
TCIRG1	T Cell Immune Regulator 1, ATPase H+ Transporting V0 Subunit A3	Protein Coding	Q13488	58	GC11P094842	12.8872	https://www.genecards.org/cgi-bin/carddisp.pl?gene=TCIRG1
WASHC4	WASH Complex Subunit 4	Protein Coding	Q2M389	49	GC12P105108	12.887	https://www.genecards.org/cgi-bin/carddisp.pl?gene=WASHC4
DNA2	DNA Replication Helicase/Nuclease 2	Protein Coding	P51530	53	GC10M068414	12.8862	https://www.genecards.org/cgi-bin/carddisp.pl?gene=DNA2
HARS2	Histidyl-TRNA Synthetase 2, Mitochondrial	Protein Coding	P49590	56	GC05P153939	12.8837	https://www.genecards.org/cgi-bin/carddisp.pl?gene=HARS2
PRIMA1	Proline Rich Membrane Anchor 1	Protein Coding	Q86XR5	44	GC14M093718	12.8816	https://www.genecards.org/cgi-bin/carddisp.pl?gene=PRIMA1
EXTL3	Exostosin Like Glycosyltransferase 3	Protein Coding	O43909	55	GC08P031397	12.8814	https://www.genecards.org/cgi-bin/carddisp.pl?gene=EXTL3
TIMM50	Translocase Of Inner Mitochondrial Membrane 50	Protein Coding	Q3ZCQ8	52	GC19P039480	12.8793	https://www.genecards.org/cgi-bin/carddisp.pl?gene=TIMM50
AIMP2	Aminoacyl TRNA Synthetase Complex Interacting Multifunctional Protein 2	Protein Coding	Q13155	56	GC07P013863	12.8753	https://www.genecards.org/cgi-bin/carddisp.pl?gene=AIMP2
SYNPO	Synaptopodin	Protein Coding	Q8N3V7	52	GC05P153802	12.8667	https://www.genecards.org/cgi-bin/carddisp.pl?gene=SYNPO
FOXO3	Forkhead Box O3	Protein Coding	O43524	60	GC06P108559	12.8661	https://www.genecards.org/cgi-bin/carddisp.pl?gene=FOXO3
AAAS	Aladin WD Repeat Nucleoporin	Protein Coding	Q9NRG9	53	GC12M053307	12.8603	https://www.genecards.org/cgi-bin/carddisp.pl?gene=AAAS
NDUFB9	NADH:Ubiquinone Oxidoreductase Subunit B9	Protein Coding	Q9Y6M9	56	GC08P124539	12.8558	https://www.genecards.org/cgi-bin/carddisp.pl?gene=NDUFB9
SLC32A1	Solute Carrier Family 32 Member 1	Protein Coding	Q9H598	55	GC20P038724	12.855	https://www.genecards.org/cgi-bin/carddisp.pl?gene=SLC32A1
GSTM3	Glutathione S-Transferase Mu 3	Protein Coding	P21266	58	GC01M109733	12.8521	https://www.genecards.org/cgi-bin/carddisp.pl?gene=GSTM3
NUBPL	NUBP Iron-Sulfur Cluster Assembly Factor, Mitochondrial	Protein Coding	Q8TB37	52	GC14P031489	12.8521	https://www.genecards.org/cgi-bin/carddisp.pl?gene=NUBPL
COA8	Cytochrome C Oxidase Assembly Factor 8	Protein Coding	Q96IL0	43	GC14P117034	12.8418	https://www.genecards.org/cgi-bin/carddisp.pl?gene=COA8
CHAMP1	Chromosome Alignment Maintaining Phosphoprotein 1	Protein Coding	Q96JM3	52	GC13P114314	12.837	https://www.genecards.org/cgi-bin/carddisp.pl?gene=CHAMP1
COQ6	Coenzyme Q6, Monooxygenase	Protein Coding	Q9Y2Z9	56	GC14P073949	12.8366	https://www.genecards.org/cgi-bin/carddisp.pl?gene=COQ6
PIGH	Phosphatidylinositol Glycan Anchor Biosynthesis Class H	Protein Coding	Q14442	50	GC14M067581	12.8356	https://www.genecards.org/cgi-bin/carddisp.pl?gene=PIGH
NHEJ1	Non-Homologous End Joining Factor 1	Protein Coding	Q9H9Q4	55	GC02M219175	12.8327	https://www.genecards.org/cgi-bin/carddisp.pl?gene=NHEJ1
COX20	Cytochrome C Oxidase Assembly Factor COX20	Protein Coding	Q5RI15	53	GC01P244856	12.8326	https://www.genecards.org/cgi-bin/carddisp.pl?gene=COX20
ADCYAP1	Adenylate Cyclase Activating Polypeptide 1	Protein Coding	P18509	55	GC18P000895	12.8286	https://www.genecards.org/cgi-bin/carddisp.pl?gene=ADCYAP1
CX3CL1	C-X3-C Motif Chemokine Ligand 1	Protein Coding	P78423	56	GC16P057372	12.8264	https://www.genecards.org/cgi-bin/carddisp.pl?gene=CX3CL1
NANS	N-Acetylneuraminate Synthase	Protein Coding	Q9NR45	55	GC09P098056	12.8241	https://www.genecards.org/cgi-bin/carddisp.pl?gene=NANS
HPD	4-Hydroxyphenylpyruvate Dioxygenase	Protein Coding	P32754	59	GC12M121839	12.8237	https://www.genecards.org/cgi-bin/carddisp.pl?gene=HPD
GRM3	Glutamate Metabotropic Receptor 3	Protein Coding	Q14832	58	GC07P086643	12.8155	https://www.genecards.org/cgi-bin/carddisp.pl?gene=GRM3
BUB1B	BUB1 Mitotic Checkpoint Serine/Threonine Kinase B	Protein Coding	O60566	63	GC15P040161	12.809	https://www.genecards.org/cgi-bin/carddisp.pl?gene=BUB1B
DPF2	Double PHD Fingers 2	Protein Coding	Q92785	56	GC11P094619	12.8085	https://www.genecards.org/cgi-bin/carddisp.pl?gene=DPF2
AP4E1	Adaptor Related Protein Complex 4 Subunit Epsilon 1	Protein Coding	Q9UPM8	48	GC15P166361	12.8075	https://www.genecards.org/cgi-bin/carddisp.pl?gene=AP4E1
TP53RK	TP53 Regulating Kinase	Protein Coding	Q96S44	54	GC20M046684	12.8069	https://www.genecards.org/cgi-bin/carddisp.pl?gene=TP53RK
CCBE1	Collagen And Calcium Binding EGF Domains 1	Protein Coding	Q6UXH8	52	GC18M059430	12.8031	https://www.genecards.org/cgi-bin/carddisp.pl?gene=CCBE1
BCKDK	Branched Chain Keto Acid Dehydrogenase Kinase	Protein Coding	O14874	58	GC16P096767	12.7885	https://www.genecards.org/cgi-bin/carddisp.pl?gene=BCKDK
ASXL2	ASXL Transcriptional Regulator 2	Protein Coding	Q76L83	50	GC02M025733	12.7825	https://www.genecards.org/cgi-bin/carddisp.pl?gene=ASXL2
SLC6A5	Solute Carrier Family 6 Member 5	Protein Coding	Q9Y345	58	GC11P020599	12.7804	https://www.genecards.org/cgi-bin/carddisp.pl?gene=SLC6A5
SCN4B	Sodium Voltage-Gated Channel Beta Subunit 4	Protein Coding	Q8IWT1	56	GC11M130124	12.775	https://www.genecards.org/cgi-bin/carddisp.pl?gene=SCN4B
NSD2	Nuclear Receptor Binding SET Domain Protein 2	Protein Coding	O96028	58	GC04P004731	12.7695	https://www.genecards.org/cgi-bin/carddisp.pl?gene=NSD2
ANOS1	Anosmin 1	Protein Coding	P23352	52	GC0XM008528	12.769	https://www.genecards.org/cgi-bin/carddisp.pl?gene=ANOS1
MOG	Myelin Oligodendrocyte Glycoprotein	Protein Coding	Q16653	58	GC06P144702	12.7624	https://www.genecards.org/cgi-bin/carddisp.pl?gene=MOG
TSEN34	TRNA Splicing Endonuclease Subunit 34	Protein Coding	Q9BSV6	50	GC19P131722	12.7596	https://www.genecards.org/cgi-bin/carddisp.pl?gene=TSEN34
GCM2	Glial Cells Missing Transcription Factor 2	Protein Coding	O75603	53	GC06M010873	12.7579	https://www.genecards.org/cgi-bin/carddisp.pl?gene=GCM2
MIR7-3HG	MIR7-3 Host Gene	RNA Gene	Q8N6C7	35	GC19P122009	12.7521	https://www.genecards.org/cgi-bin/carddisp.pl?gene=MIR7-3HG
PCDH7	Protocadherin 7	Protein Coding	O60245	50	GC04P030722	12.7515	https://www.genecards.org/cgi-bin/carddisp.pl?gene=PCDH7
LOX	Lysyl Oxidase	Protein Coding	P28300	60	GC05M122063	12.7447	https://www.genecards.org/cgi-bin/carddisp.pl?gene=LOX
AMER1	APC Membrane Recruitment Protein 1	Protein Coding	Q5JTC6	50	GC0XM064185	12.7416	https://www.genecards.org/cgi-bin/carddisp.pl?gene=AMER1
TTC21B	Tetratricopeptide Repeat Domain 21B	Protein Coding	Q7Z4L5	53	GC02M165905	12.7369	https://www.genecards.org/cgi-bin/carddisp.pl?gene=TTC21B
XK	X-Linked Kx Blood Group Antigen, Kell And VPS13A Binding Protein	Protein Coding	P51811	53	GC0XP037685	12.7341	https://www.genecards.org/cgi-bin/carddisp.pl?gene=XK
ACP5	Acid Phosphatase 5, Tartrate Resistant	Protein Coding	P13686	59	GC19M011574	12.7337	https://www.genecards.org/cgi-bin/carddisp.pl?gene=ACP5
PDHX	Pyruvate Dehydrogenase Complex Component X	Protein Coding	O00330	58	GC11P034894	12.73	https://www.genecards.org/cgi-bin/carddisp.pl?gene=PDHX
ZNF711	Zinc Finger Protein 711	Protein Coding	Q9Y462	51	GC0XP085243	12.7277	https://www.genecards.org/cgi-bin/carddisp.pl?gene=ZNF711
SLC6A2	Solute Carrier Family 6 Member 2	Protein Coding	P23975	59	GC16P097304	12.7259	https://www.genecards.org/cgi-bin/carddisp.pl?gene=SLC6A2
BOLA3	BolA Family Member 3	Protein Coding	Q53S33	51	GC02M074136	12.7224	https://www.genecards.org/cgi-bin/carddisp.pl?gene=BOLA3
FDFT1	Farnesyl-Diphosphate Farnesyltransferase 1	Protein Coding	P37268	58	GC08P011795	12.7181	https://www.genecards.org/cgi-bin/carddisp.pl?gene=FDFT1
AP4S1	Adaptor Related Protein Complex 4 Subunit Sigma 1	Protein Coding	Q9Y587	50	GC14P031025	12.7165	https://www.genecards.org/cgi-bin/carddisp.pl?gene=AP4S1
HLA-DQA1	Major Histocompatibility Complex, Class II, DQ Alpha 1	Protein Coding	P01909	55	GC06P144795	12.7156	https://www.genecards.org/cgi-bin/carddisp.pl?gene=HLA-DQA1
GAS1	Growth Arrest Specific 1	Protein Coding	P54826	54	GC09M086944	12.7149	https://www.genecards.org/cgi-bin/carddisp.pl?gene=GAS1
NID1	Nidogen 1	Protein Coding	P14543	56	GC01M235975	12.7106	https://www.genecards.org/cgi-bin/carddisp.pl?gene=NID1
DISP1	Dispatched RND Transporter Family Member 1	Protein Coding	Q96F81	52	GC01P222837	12.71	https://www.genecards.org/cgi-bin/carddisp.pl?gene=DISP1
PRMT7	Protein Arginine Methyltransferase 7	Protein Coding	Q9NVM4	56	GC16P097697	12.7062	https://www.genecards.org/cgi-bin/carddisp.pl?gene=PRMT7
SH2B1	SH2B Adaptor Protein 1	Protein Coding	Q9NRF2	54	GC16P096578	12.7046	https://www.genecards.org/cgi-bin/carddisp.pl?gene=SH2B1
WARS2	Tryptophanyl TRNA Synthetase 2, Mitochondrial	Protein Coding	Q9UGM6	57	GC01M119031	12.7032	https://www.genecards.org/cgi-bin/carddisp.pl?gene=WARS2
MIR151A	MicroRNA 151a	RNA Gene		28	GC08M140954	12.7006	https://www.genecards.org/cgi-bin/carddisp.pl?gene=MIR151A
TNK2	Tyrosine Kinase Non Receptor 2	Protein Coding	Q07912	60	GC03M195863	12.6956	https://www.genecards.org/cgi-bin/carddisp.pl?gene=TNK2
CRADD	CASP2 And RIPK1 Domain Containing Adaptor With Death Domain	Protein Coding	P78560	57	GC12P093677	12.694	https://www.genecards.org/cgi-bin/carddisp.pl?gene=CRADD
DSCAM	DS Cell Adhesion Molecule	Protein Coding	O60469	54	GC21M040010	12.6894	https://www.genecards.org/cgi-bin/carddisp.pl?gene=DSCAM
GATA6	GATA Binding Protein 6	Protein Coding	Q92908	60	GC18P022169	12.6797	https://www.genecards.org/cgi-bin/carddisp.pl?gene=GATA6
MIR320A	MicroRNA 320a	RNA Gene		31	GC08M022339	12.6783	https://www.genecards.org/cgi-bin/carddisp.pl?gene=MIR320A
SNX10	Sorting Nexin 10	Protein Coding	Q9Y5X0	52	GC07P026291	12.6766	https://www.genecards.org/cgi-bin/carddisp.pl?gene=SNX10
NEK9	NIMA Related Kinase 9	Protein Coding	Q8TD19	58	GC14M075079	12.662	https://www.genecards.org/cgi-bin/carddisp.pl?gene=NEK9
PLPBP	Pyridoxal Phosphate Binding Protein	Protein Coding	O94903	51	GC08P040401	12.6614	https://www.genecards.org/cgi-bin/carddisp.pl?gene=PLPBP
HIC1	HIC ZBTB Transcriptional Repressor 1	Protein Coding	Q14526	54	GC17P002054	12.6589	https://www.genecards.org/cgi-bin/carddisp.pl?gene=HIC1
SYT14	Synaptotagmin 14	Protein Coding	Q8NB59	48	GC01P209900	12.6568	https://www.genecards.org/cgi-bin/carddisp.pl?gene=SYT14
PIGL	Phosphatidylinositol Glycan Anchor Biosynthesis Class L	Protein Coding	Q9Y2B2	51	GC17P016217	12.6486	https://www.genecards.org/cgi-bin/carddisp.pl?gene=PIGL
WAC	WW Domain Containing Adaptor With Coiled-Coil	Protein Coding	Q9BTA9	51	GC10P028545	12.6469	https://www.genecards.org/cgi-bin/carddisp.pl?gene=WAC
COG8	Component Of Oligomeric Golgi Complex 8	Protein Coding	Q96MW5	51	GC16M069320	12.6458	https://www.genecards.org/cgi-bin/carddisp.pl?gene=COG8
MIR451A	MicroRNA 451a	RNA Gene		26	GC17M028861	12.643	https://www.genecards.org/cgi-bin/carddisp.pl?gene=MIR451A
B9D1	B9 Domain Containing 1	Protein Coding	Q9UPM9	47	GC17M019334	12.6424	https://www.genecards.org/cgi-bin/carddisp.pl?gene=B9D1
UFC1	Ubiquitin-Fold Modifier Conjugating Enzyme 1	Protein Coding	Q9Y3C8	51	GC01P161152	12.6365	https://www.genecards.org/cgi-bin/carddisp.pl?gene=UFC1
TKT	Transketolase	Protein Coding	P29401	59	GC03M053224	12.6335	https://www.genecards.org/cgi-bin/carddisp.pl?gene=TKT
SARS2	Seryl-TRNA Synthetase 2, Mitochondrial	Protein Coding	Q9NP81	57	GC19M096849	12.6329	https://www.genecards.org/cgi-bin/carddisp.pl?gene=SARS2
LPL	Lipoprotein Lipase	Protein Coding	P06858	63	GC08P019901	12.631	https://www.genecards.org/cgi-bin/carddisp.pl?gene=LPL
KIF7	Kinesin Family Member 7	Protein Coding	Q2M1P5	51	GC15M089608	12.6304	https://www.genecards.org/cgi-bin/carddisp.pl?gene=KIF7
SLC22A8	Solute Carrier Family 22 Member 8	Protein Coding	Q8TCC7	54	GC11M128882	12.6299	https://www.genecards.org/cgi-bin/carddisp.pl?gene=SLC22A8
RREB1	Ras Responsive Element Binding Protein 1	Protein Coding	Q92766	54	GC06P007107	12.6297	https://www.genecards.org/cgi-bin/carddisp.pl?gene=RREB1
CHL1	Cell Adhesion Molecule L1 Like	Protein Coding	O00533	56	GC03P000213	12.6296	https://www.genecards.org/cgi-bin/carddisp.pl?gene=CHL1
FBXO31	F-Box Protein 31	Protein Coding	Q5XUX0	49	GC16M087326	12.6246	https://www.genecards.org/cgi-bin/carddisp.pl?gene=FBXO31
CPA6	Carboxypeptidase A6	Protein Coding	Q8N4T0	55	GC08M067422	12.6237	https://www.genecards.org/cgi-bin/carddisp.pl?gene=CPA6
MIR132	MicroRNA 132	RNA Gene		31	GC17M002049	12.6213	https://www.genecards.org/cgi-bin/carddisp.pl?gene=MIR132
NDUFAF1	NADH:Ubiquinone Oxidoreductase Complex Assembly Factor 1	Protein Coding	Q9Y375	54	GC15M041387	12.6212	https://www.genecards.org/cgi-bin/carddisp.pl?gene=NDUFAF1
WDR4	WD Repeat Domain 4	Protein Coding	P57081	50	GC21M042843	12.6212	https://www.genecards.org/cgi-bin/carddisp.pl?gene=WDR4
MED13L	Mediator Complex Subunit 13L	Protein Coding	Q71F56	51	GC12M115953	12.6183	https://www.genecards.org/cgi-bin/carddisp.pl?gene=MED13L
ACTN4	Actinin Alpha 4	Protein Coding	O43707	60	GC19P038647	12.6159	https://www.genecards.org/cgi-bin/carddisp.pl?gene=ACTN4
PLOD1	Procollagen-Lysine,2-Oxoglutarate 5-Dioxygenase 1	Protein Coding	Q02809	58	GC01P011934	12.6103	https://www.genecards.org/cgi-bin/carddisp.pl?gene=PLOD1
CIZ1	CDKN1A Interacting Zinc Finger Protein 1	Protein Coding	Q9ULV3	49	GC09M130449	12.6087	https://www.genecards.org/cgi-bin/carddisp.pl?gene=CIZ1
SOST	Sclerostin	Protein Coding	Q9BQB4	56	GC17M043753	12.5994	https://www.genecards.org/cgi-bin/carddisp.pl?gene=SOST
TMEM126B	Transmembrane Protein 126B	Protein Coding	Q8IUX1	50	GC11P085628	12.5975	https://www.genecards.org/cgi-bin/carddisp.pl?gene=TMEM126B
ATXN1	Ataxin 1	Protein Coding	P54253	57	GC06M016299	12.5962	https://www.genecards.org/cgi-bin/carddisp.pl?gene=ATXN1
DBT	Dihydrolipoamide Branched Chain Transacylase E2	Protein Coding	P11182	55	GC01M100186	12.594	https://www.genecards.org/cgi-bin/carddisp.pl?gene=DBT
ADM	Adrenomedullin	Protein Coding	P35318	57	GC11P012779	12.5921	https://www.genecards.org/cgi-bin/carddisp.pl?gene=ADM
HADHA	Hydroxyacyl-CoA Dehydrogenase Trifunctional Multienzyme Complex Subunit Alpha	Protein Coding	P40939	60	GC02M026190	12.5921	https://www.genecards.org/cgi-bin/carddisp.pl?gene=HADHA
UQCRC2	Ubiquinol-Cytochrome C Reductase Core Protein 2	Protein Coding	P22695	58	GC16P096351	12.5909	https://www.genecards.org/cgi-bin/carddisp.pl?gene=UQCRC2
ECHS1	Enoyl-CoA Hydratase, Short Chain 1	Protein Coding	P30084	58	GC10M133362	12.5889	https://www.genecards.org/cgi-bin/carddisp.pl?gene=ECHS1
DOCK7	Dedicator Of Cytokinesis 7	Protein Coding	Q96N67	54	GC01M062454	12.576	https://www.genecards.org/cgi-bin/carddisp.pl?gene=DOCK7
XIAP	X-Linked Inhibitor Of Apoptosis	Protein Coding	P98170	64	GC0XP123859	12.5744	https://www.genecards.org/cgi-bin/carddisp.pl?gene=XIAP
COG6	Component Of Oligomeric Golgi Complex 6	Protein Coding	Q9Y2V7	51	GC13P039655	12.5742	https://www.genecards.org/cgi-bin/carddisp.pl?gene=COG6
CXCL1	C-X-C Motif Chemokine Ligand 1	Protein Coding	P09341	56	GC04P073869	12.5647	https://www.genecards.org/cgi-bin/carddisp.pl?gene=CXCL1
CDC40	Cell Division Cycle 40	Protein Coding	O60508	51	GC06P110180	12.5619	https://www.genecards.org/cgi-bin/carddisp.pl?gene=CDC40
SCARB1	Scavenger Receptor Class B Member 1	Protein Coding	Q8WTV0	60	GC12M124776	12.5604	https://www.genecards.org/cgi-bin/carddisp.pl?gene=SCARB1
DRD3	Dopamine Receptor D3	Protein Coding	P35462	57	GC03M114128	12.5604	https://www.genecards.org/cgi-bin/carddisp.pl?gene=DRD3
NDUFA11	NADH:Ubiquinone Oxidoreductase Subunit A11	Protein Coding	Q86Y39	51	GC19M005891	12.5549	https://www.genecards.org/cgi-bin/carddisp.pl?gene=NDUFA11
ACSF3	Acyl-CoA Synthetase Family Member 3	Protein Coding	Q4G176	55	GC16P089088	12.5534	https://www.genecards.org/cgi-bin/carddisp.pl?gene=ACSF3
SPTLC1	Serine Palmitoyltransferase Long Chain Base Subunit 1	Protein Coding	O15269	58	GC09M111277	12.5524	https://www.genecards.org/cgi-bin/carddisp.pl?gene=SPTLC1
ATG7	Autophagy Related 7	Protein Coding	O95352	56	GC03P022815	12.5513	https://www.genecards.org/cgi-bin/carddisp.pl?gene=ATG7
CTCF	CCCTC-Binding Factor	Protein Coding	P49711	60	GC16P097654	12.5467	https://www.genecards.org/cgi-bin/carddisp.pl?gene=CTCF
TRAK1	Trafficking Kinesin Protein 1	Protein Coding	Q9UPV9	53	GC03P042065	12.5421	https://www.genecards.org/cgi-bin/carddisp.pl?gene=TRAK1
IARS2	Isoleucyl-TRNA Synthetase 2, Mitochondrial	Protein Coding	Q9NSE4	54	GC01P220094	12.5339	https://www.genecards.org/cgi-bin/carddisp.pl?gene=IARS2
NLGN1	Neuroligin 1	Protein Coding	Q8N2Q7	58	GC03P173399	12.5313	https://www.genecards.org/cgi-bin/carddisp.pl?gene=NLGN1
MIR106B	MicroRNA 106b	RNA Gene		31	GC07M105744	12.5287	https://www.genecards.org/cgi-bin/carddisp.pl?gene=MIR106B
PCK1	Phosphoenolpyruvate Carboxykinase 1	Protein Coding	P35558	60	GC20P057561	12.5275	https://www.genecards.org/cgi-bin/carddisp.pl?gene=PCK1
CCDC115	Coiled-Coil Domain Containing 115	Protein Coding	Q96NT0	49	GC02M137313	12.5145	https://www.genecards.org/cgi-bin/carddisp.pl?gene=CCDC115
MPL	MPL Proto-Oncogene, Thrombopoietin Receptor	Protein Coding	P40238	61	GC01P043337	12.5131	https://www.genecards.org/cgi-bin/carddisp.pl?gene=MPL
YARS2	Tyrosyl-TRNA Synthetase 2	Protein Coding	Q9Y2Z4	57	GC12M032882	12.5054	https://www.genecards.org/cgi-bin/carddisp.pl?gene=YARS2
ZDHHC9	Zinc Finger DHHC-Type Palmitoyltransferase 9	Protein Coding	Q9Y397	55	GC0XM129803	12.5051	https://www.genecards.org/cgi-bin/carddisp.pl?gene=ZDHHC9
NCAPD3	Non-SMC Condensin II Complex Subunit D3	Protein Coding	P42695	52	GC11M134150	12.505	https://www.genecards.org/cgi-bin/carddisp.pl?gene=NCAPD3
CNOT1	CCR4-NOT Transcription Complex Subunit 1	Protein Coding	A5YKK6	52	GC16M058519	12.5028	https://www.genecards.org/cgi-bin/carddisp.pl?gene=CNOT1
CLPP	Caseinolytic Mitochondrial Matrix Peptidase Proteolytic Subunit	Protein Coding	Q16740	58	GC19P122066	12.5017	https://www.genecards.org/cgi-bin/carddisp.pl?gene=CLPP
LIMK1	LIM Domain Kinase 1	Protein Coding	P53667	62	GC07P074082	12.4979	https://www.genecards.org/cgi-bin/carddisp.pl?gene=LIMK1
PPM1D	Protein Phosphatase, Mg2+/Mn2+ Dependent 1D	Protein Coding	O15297	60	GC17P060600	12.4977	https://www.genecards.org/cgi-bin/carddisp.pl?gene=PPM1D
BCHE	Butyrylcholinesterase	Protein Coding	P06276	63	GC03M165772	12.496	https://www.genecards.org/cgi-bin/carddisp.pl?gene=BCHE
IL33	Interleukin 33	Protein Coding	O95760	52	GC09P009584	12.4956	https://www.genecards.org/cgi-bin/carddisp.pl?gene=IL33
ZMYND11	Zinc Finger MYND-Type Containing 11	Protein Coding	Q15326	54	GC10P000134	12.4945	https://www.genecards.org/cgi-bin/carddisp.pl?gene=ZMYND11
TRH	Thyrotropin Releasing Hormone	Protein Coding	P20396	53	GC03P129974	12.4943	https://www.genecards.org/cgi-bin/carddisp.pl?gene=TRH
ERLIN2	ER Lipid Raft Associated 2	Protein Coding	O94905	56	GC08P037736	12.4941	https://www.genecards.org/cgi-bin/carddisp.pl?gene=ERLIN2
FGD1	FYVE, RhoGEF And PH Domain Containing 1	Protein Coding	P98174	53	GC0XM054486	12.4929	https://www.genecards.org/cgi-bin/carddisp.pl?gene=FGD1
DAO	D-Amino Acid Oxidase	Protein Coding	P14920	58	GC12P108870	12.4918	https://www.genecards.org/cgi-bin/carddisp.pl?gene=DAO
COL25A1	Collagen Type XXV Alpha 1 Chain	Protein Coding	Q9BXS0	50	GC04M108810	12.4883	https://www.genecards.org/cgi-bin/carddisp.pl?gene=COL25A1
LRFN2	Leucine Rich Repeat And Fibronectin Type III Domain Containing 2	Protein Coding	Q9ULH4	51	GC06M097284	12.4831	https://www.genecards.org/cgi-bin/carddisp.pl?gene=LRFN2
ACE2	Angiotensin Converting Enzyme 2	Protein Coding	Q9BYF1	62	GC0XM015494	12.4824	https://www.genecards.org/cgi-bin/carddisp.pl?gene=ACE2
MMAA	Metabolism Of Cobalamin Associated A	Protein Coding	Q8IVH4	51	GC04P145642	12.4784	https://www.genecards.org/cgi-bin/carddisp.pl?gene=MMAA
TMEM127	Transmembrane Protein 127	Protein Coding	O75204	51	GC02M096248	12.4752	https://www.genecards.org/cgi-bin/carddisp.pl?gene=TMEM127
RNF13	Ring Finger Protein 13	Protein Coding	O43567	54	GC03P149812	12.4741	https://www.genecards.org/cgi-bin/carddisp.pl?gene=RNF13
LIPT1	Lipoyltransferase 1	Protein Coding	Q9Y234	53	GC02P099248	12.4741	https://www.genecards.org/cgi-bin/carddisp.pl?gene=LIPT1
TRAPPC4	Trafficking Protein Particle Complex Subunit 4	Protein Coding	Q9Y296	48	GC11P119018	12.4706	https://www.genecards.org/cgi-bin/carddisp.pl?gene=TRAPPC4
HP	Haptoglobin	Protein Coding	P00738	58	GC16P097888	12.4701	https://www.genecards.org/cgi-bin/carddisp.pl?gene=HP
MT-ATP6	Mitochondrially Encoded ATP Synthase Membrane Subunit 6	Protein Coding	P00846	43	GCMTP008531	12.4696	https://www.genecards.org/cgi-bin/carddisp.pl?gene=MT-ATP6
MID2	Midline 2	Protein Coding	Q9UJV3	51	GC0XP107825	12.4681	https://www.genecards.org/cgi-bin/carddisp.pl?gene=MID2
HTR1B	5-Hydroxytryptamine Receptor 1B	Protein Coding	P28222	56	GC06M097753	12.4679	https://www.genecards.org/cgi-bin/carddisp.pl?gene=HTR1B
POU3F2	POU Class 3 Homeobox 2	Protein Coding	P20265	55	GC06P098834	12.4674	https://www.genecards.org/cgi-bin/carddisp.pl?gene=POU3F2
CLDN1	Claudin 1	Protein Coding	O95832	59	GC03M190305	12.4652	https://www.genecards.org/cgi-bin/carddisp.pl?gene=CLDN1
NDUFAF5	NADH:Ubiquinone Oxidoreductase Complex Assembly Factor 5	Protein Coding	Q5TEU4	49	GC20P014020	12.4642	https://www.genecards.org/cgi-bin/carddisp.pl?gene=NDUFAF5
SEC24D	SEC24 Homolog D, COPII Coat Complex Component	Protein Coding	O94855	56	GC04M118722	12.4593	https://www.genecards.org/cgi-bin/carddisp.pl?gene=SEC24D
GNS	Glucosamine (N-Acetyl)-6-Sulfatase	Protein Coding	P15586	58	GC12M064713	12.4584	https://www.genecards.org/cgi-bin/carddisp.pl?gene=GNS
FCGR2A	Fc Gamma Receptor IIa	Protein Coding	P12318	60	GC01P161505	12.4507	https://www.genecards.org/cgi-bin/carddisp.pl?gene=FCGR2A
RORB	RAR Related Orphan Receptor B	Protein Coding	Q92753	59	GC09P074497	12.4483	https://www.genecards.org/cgi-bin/carddisp.pl?gene=RORB
NOD2	Nucleotide Binding Oligomerization Domain Containing 2	Protein Coding	Q9HC29	60	GC16P050693	12.4386	https://www.genecards.org/cgi-bin/carddisp.pl?gene=NOD2
ARCN1	Archain 1	Protein Coding	P48444	55	GC11P118572	12.433	https://www.genecards.org/cgi-bin/carddisp.pl?gene=ARCN1
FBXO28	F-Box Protein 28	Protein Coding	Q9NVF7	49	GC01P224143	12.425	https://www.genecards.org/cgi-bin/carddisp.pl?gene=FBXO28
ITGA4	Integrin Subunit Alpha 4	Protein Coding	P13612	62	GC02P181475	12.4221	https://www.genecards.org/cgi-bin/carddisp.pl?gene=ITGA4
COL6A1	Collagen Type VI Alpha 1 Chain	Protein Coding	P12109	59	GC21P045981	12.4211	https://www.genecards.org/cgi-bin/carddisp.pl?gene=COL6A1
MIR22	MicroRNA 22	RNA Gene		31	GC17M001713	12.4209	https://www.genecards.org/cgi-bin/carddisp.pl?gene=MIR22
SMARCAL1	SWI/SNF Related, Matrix Associated, Actin Dependent Regulator Of Chromatin, Subfamily A Like 1	Protein Coding	Q9NZC9	58	GC02P216412	12.4179	https://www.genecards.org/cgi-bin/carddisp.pl?gene=SMARCAL1
IL17F	Interleukin 17F	Protein Coding	Q96PD4	54	GC06M097463	12.4155	https://www.genecards.org/cgi-bin/carddisp.pl?gene=IL17F
CYP46A1	Cytochrome P450 Family 46 Subfamily A Member 1	Protein Coding	Q9Y6A2	55	GC14P099684	12.4135	https://www.genecards.org/cgi-bin/carddisp.pl?gene=CYP46A1
STING1	Stimulator Of Interferon Response CGAMP Interactor 1	Protein Coding	Q86WV6	54	GC05M139495	12.4091	https://www.genecards.org/cgi-bin/carddisp.pl?gene=STING1
GRIN3B	Glutamate Ionotropic Receptor NMDA Type Subunit 3B	Protein Coding	O60391	55	GC19P001000	12.4067	https://www.genecards.org/cgi-bin/carddisp.pl?gene=GRIN3B
BICRA	BRD4 Interacting Chromatin Remodeling Complex Associated Protein	Protein Coding	Q9NZM4	45	GC19P123331	12.406	https://www.genecards.org/cgi-bin/carddisp.pl?gene=BICRA
FMN2	Formin 2	Protein Coding	Q9NZ56	52	GC01P240014	12.4011	https://www.genecards.org/cgi-bin/carddisp.pl?gene=FMN2
BMAL1	Basic Helix-Loop-Helix ARNT Like 1	Protein Coding	O00327	54	GC11P013282	12.3905	https://www.genecards.org/cgi-bin/carddisp.pl?gene=BMAL1
SHANK1	SH3 And Multiple Ankyrin Repeat Domains 1	Protein Coding	Q9Y566	52	GC19M050659	12.3895	https://www.genecards.org/cgi-bin/carddisp.pl?gene=SHANK1
PREPL	Prolyl Endopeptidase Like	Protein Coding	Q4J6C6	55	GC02M044316	12.3892	https://www.genecards.org/cgi-bin/carddisp.pl?gene=PREPL
NDUFS6	NADH:Ubiquinone Oxidoreductase Subunit S6	Protein Coding	O75380	56	GC05P001801	12.38	https://www.genecards.org/cgi-bin/carddisp.pl?gene=NDUFS6
NCF2	Neutrophil Cytosolic Factor 2	Protein Coding	P19878	60	GC01M186050	12.3799	https://www.genecards.org/cgi-bin/carddisp.pl?gene=NCF2
MIR29B1	MicroRNA 29b-1	RNA Gene		29	GC07M130877	12.3791	https://www.genecards.org/cgi-bin/carddisp.pl?gene=MIR29B1
ZNF592	Zinc Finger Protein 592	Protein Coding	Q92610	48	GC15P167142	12.3742	https://www.genecards.org/cgi-bin/carddisp.pl?gene=ZNF592
PUS1	Pseudouridine Synthase 1	Protein Coding	Q9Y606	56	GC12P131929	12.374	https://www.genecards.org/cgi-bin/carddisp.pl?gene=PUS1
[truncated: 9,277 more rows]

## Sheet: OMIM-Gene-Map-Retrieval
Gene Map Search - 'brain injury '
Downloaded:	September 30, 2024
Copyright (c) 1966-2024 Johns Hopkins University OMIM, data are provided for research purposes only.
Cytogenetic location	Genomic coordinates (From NCBI/GRCh38)	Gene/Locus	Gene/Locus name	Gene/Locus MIM number	Approved Symbol	Entrez Gene ID	Ensembl Gene ID	Comments	Phenotype	Phenotype MIM number	Inheritance	Pheno map key	Mouse Gene (from MGI)
1p36.33	1:1311600-1324660	INTS11, PSF3L, RC68, NEDMLOB	Integrator complex subunit 11	611354	INTS11	54973	ENSG00000127054,ENST00000435064;;;ENST00000435064		Neurodevelopmental disorder with motor and language delay, ocular defects, and brain abnormalities	620428	AR	3	Ints11
1p36.23	1:8352404-8817640	RERE, NEDBEH	Arginine-glutamic acid dipeptide repeats	605226	RERE	473	ENSG00000142599,ENST00000400908;;;ENST00000400908		Neurodevelopmental disorder with or without anomalies of the brain, eye, or heart	616975	AD	3	Rere
1p36.12	1:22710838-22921500	EPHB2, EPHT3, DRT, ERK, PCBC, CAPB, BDPLT22	eph tyrosine kinase 3 (ephrin receptor EphB2)	600997	EPHB2	2048	ENSG00000133216,ENST00000374630;;;ENST00000374630	mutation identified in 1 BDPLT22 family	?Bleeding disorder, platelet-type, 22	618462	AR	3	Ephb2
1p36.12	1:22710838-22921500	EPHB2, EPHT3, DRT, ERK, PCBC, CAPB, BDPLT22	eph tyrosine kinase 3 (ephrin receptor EphB2)	600997	EPHB2	2048	ENSG00000133216,ENST00000374630;;;ENST00000374630	mutation identified in 1 BDPLT22 family	{Prostate cancer/brain cancer susceptibility, somatic}	603688		3	Ephb2
1p36.12	1:23304688-23344284	HNRPR, HNRNPR, NEDDFSB	Heterogeneous nuclear ribonucleoprotein R	607201	HNRNPR	10236	ENSG00000125944,ENST00000302271;;;ENST00000302271		Neurodevelopmental disorder with dysmorphic facies and skeletal and brain abnormalities	620073	AD	3	Hnrnpr
1p34.2	1:39955145-39969956	MFSD2A, NEDMISBA	Major facilitator superfamily domain-containing protein 2A	614397	MFSD2A	84879	ENSG00000168389,ENST00000372811;;;ENST00000372811		Neurodevelopmental disorder with progressive microcephaly, spasticity, and brain abnormalities	616486	AR	3	Mfsd2a
1p34.1	1:45326895-45328710	HPDL, NEDSWMA, SPG83	4-hydroxyphenylpyruvate dioxygenase-like	618994	HPDL	84842	ENSG00000186603,ENST00000334815;;;ENST00000334815		Neurodevelopmental disorder with progressive spasticity and brain white matter abnormalities	619026	AR	3	Hpdl
1p34.1	1:45326895-45328710	HPDL, NEDSWMA, SPG83	4-hydroxyphenylpyruvate dioxygenase-like	618994	HPDL	84842	ENSG00000186603,ENST00000334815;;;ENST00000334815		Spastic paraplegia 83, autosomal recessive	619027	AR	3	Hpdl
1p34.1	1:46188683-46220305	POMGNT1, MEB, MDDGA3, MDDGB3, MDDGC3, RP76, LGMDR15	Protein 0-mannose beta-1,2-N-acetylglucosaminyltransferase	606822	POMGNT1	55624	ENSG00000085998,ENST00000371984;;;ENST00000371984		Muscular dystrophy-dystroglycanopathy (congenital with brain and eye anomalies), type A, 3	253280	AR	3	Pomgnt1
1p34.1	1:46188683-46220305	POMGNT1, MEB, MDDGA3, MDDGB3, MDDGC3, RP76, LGMDR15	Protein 0-mannose beta-1,2-N-acetylglucosaminyltransferase	606822	POMGNT1	55624	ENSG00000085998,ENST00000371984;;;ENST00000371984		Muscular dystrophy-dystroglycanopathy (congenital with impaired intellectual development), type B, 3	613151	AR	3	Pomgnt1
1p34.1	1:46188683-46220305	POMGNT1, MEB, MDDGA3, MDDGB3, MDDGC3, RP76, LGMDR15	Protein 0-mannose beta-1,2-N-acetylglucosaminyltransferase	606822	POMGNT1	55624	ENSG00000085998,ENST00000371984;;;ENST00000371984		Muscular dystrophy-dystroglycanopathy (limb-girdle), type C, 3	613157	AR	3	Pomgnt1
1p34.1	1:46188683-46220305	POMGNT1, MEB, MDDGA3, MDDGB3, MDDGC3, RP76, LGMDR15	Protein 0-mannose beta-1,2-N-acetylglucosaminyltransferase	606822	POMGNT1	55624	ENSG00000085998,ENST00000371984;;;ENST00000371984		Retinitis pigmentosa 76	617123	AR	3	Pomgnt1
1p32.3	1:51907956-51990700	RAB3B	Brain antigen RAB3B	179510	RAB3B	5865	ENSG00000169213,ENST00000371655;;;ENST00000371655					Rab3b
1p31.3	1:61077227-61462788	NFIA, BRMUTD	Nuclear factor I/A	600727	NFIA	4774	ENSG00000162599,ENST00000403491;;;ENST00000403491		Brain malformations with or without urinary tract defects	613735	AD	3	Nfia
1p13.3	1:109733937-109741038	GSTM3, GST5	Glutathione S-transferase M3, brain	138390	GSTM3	2947	ENSG00000134202,ENST00000361066;;;ENST00000361066					Gstm5
1q21.3	1:151008449-151035713	PRUNE1, DRES17, NMIHBA	Prune exopolyphosphatase 1	617413	PRUNE1	58497	ENSG00000143363,ENST00000271620;;;ENST00000271620		Neurodevelopmental disorder with microcephaly, hypotonia, and variable brain anomalies	617481	AR	3	Prune1
1q22	1:156591776-156594299	NAXE, APOA1BP, AIBP, PEBEL	NAD(P)HX epimerase	608862	NAXE	128240	ENSG00000163382,ENST00000368235;;;ENST00000368235		Encephalopathy, progressive, early-onset, with brain edema and/or leukoencephalopathy	617186	AR	3	Naxe
1q25.1	1:173824673-173858546	DARS2, ASPRS. LBSL	Aspartyl-tRNA synthetase 2	610956	DARS2	55157	ENSG00000117593,ENST00000649689;;;ENST00000649689		Leukoencephalopathy with brain stem and spinal cord involvement and lactate elevation	611105	AR	3	Dars2
1q42.2	1:231332753-231337852	EXOC8, EXO84, SEC84, NEDMISB	Exocyst complex component 8	615283	EXOC8	149371	ENSG00000116903,ENST00000366645;;;ENST00000366645	mutation identified in 1 NEDMISB family	?Neurodevelopmental disorder with microcephaly, seizures, and brain atrophy	619076	AR	3	Exoc8
1q42.3	1:235439796-235504452	B3GALNT2, MGC39558, MDDGA11	Beta-1,3-N-acetylgalactosaminyltransferase 2	610194	B3GALNT2	148789	ENSG00000162885,ENST00000366600;;;ENST00000366600		Muscular dystrophy-dystroglycanopathy (congenital with brain and eye anomalies), type A, 11	615181	AR	3	B3galnt2
2p25.3	2:3379694-3479565	TRAPPC12, TTC15, PEBAS	Trafficking protein particle complex, subunit 12	614139	TRAPPC12	51112	ENSG00000171853,ENST00000324266;;;ENST00000324266		Encephalopathy, progressive, early-onset, with brain atrophy and spasticity	617669	AR	3	Trappc12
2p23.2	2:27888709-28338901	BRE, BRCC4, BRCC45	Brain and reproductive organ-expressed protein	610497	BABAM2	9577	ENSG00000158019,ENST00000379624;;;ENST00000379624					Babam2
2p21	2:47335315-47335514	BCYRN1, BC200	Brain cytoplasmic RNA 1	606089	BCYRN1	618	ENSG00000236824,ENST00000418539
2p16.3	2:48440766-48515386	PPP1R21, CCDC128, KLRAQ1, NEDHFBA	Protein phosphatase 1, regulatory subunit 21	618159	PPP1R21	129285	ENSG00000162869,ENST00000294952;;;ENST00000294952		Neurodevelopmental disorder with hypotonia, facial dysmorphism, and brain abnormalities	619383	AR	3	Ppp1r21
2p12	2:79185377-80648780	CTNNA2, CAPR, CTNR, CDCBM9	Catenin, alpha-2 (cadherin-associated protein, related)	114025	CTNNA2	1496	ENSG00000066032,ENST00000402739;;;ENST00000402739		Cortical dysplasia, complex, with other brain malformations 9	618174	AR	3	Ctnna2
2q14.2	2:118842171-118847648	EN1, ENDOVESLB	Engrailed-1	131290	EN1	2019	ENSG00000163064,ENST00000295206;;;ENST00000295206	mutation identified in 1 ENDOVESLB patient	?ENDOVE syndrome, limb-brain type	619218	AR	3	En1
2q21.1	2:130151392-130181757	SMPD4, NSMASE3, KIAA1418, NEDMABA	Sphingomyelin phosphodiesterase 4, neutral membrane	610457	SMPD4	55627	ENSG00000136699,ENST00000680298;;;ENST00000680298		Neurodevelopmental disorder with microcephaly, arthrogryposis, and structural brain anomalies	618622	AR	3	Smpd4
2q23.1-q23.2	2:148875227-149026759	KIF5C, NKHC2, CDCBM2	Kinesin family member 5C	604593	KIF5C	3800	ENSG00000168280,ENST00000435030;;;ENST00000435030		Cortical dysplasia, complex, with other brain malformations 2	615282	AD	3	Kif5c
2q24.2	2:161416297-161425870	TBR1, IDDAS	T-box, brain, 1	604616	TBR1	10716	ENSG00000136535,ENST00000389554;;;ENST00000389554		Intellectual developmental disorder with autism and speech delay	606053	AD	3	Tbr1
2q24.2	2:161624416-161985270	SLC4A10, 620746	Solute carrier family 4 (sodium bicarbonate cotransporter-like), member 10	605556	SLC4A10	57282	ENSG00000144290,ENST00000446997;;;ENST00000446997		Neurodevelopmental disorder with hypotonia and characteristic brain abnormalities	620746	AR	3	Slc4a10
2q31.1	2:170813210-170861151	GAD1, SCP, DEE89	Glutamate decarboxylase-1, brain, 67kD	605363	GAD1	2571	ENSG00000128683,ENST00000358196;;;ENST00000358196		Developmental and epileptic encephalopathy 89	619124	AR	3	Gad1
2q31.1	2:171687469-171750158	DYNC1I2, DNCI2, IC2, NEDMIBA	Dynein, cytoplasmic-1, intermediate chain-2	603331	DYNC1I2	1781	ENSG00000077380,ENST00000397119;;;ENST00000397119		Neurodevelopmental disorder with microcephaly and structural brain anomalies	618492	AR	3	Dync1i2
2q33.1	2:196833004-196926707	PGAP1, NEDDSBA	Post-GPI attachment to proteins 1	611655	PGAP1	80055	ENSG00000197121,ENST00000354764;;;ENST00000354764		Neurodevelopmental disorder with dysmorphic features, spasticity, and brain abnormalities	615802	AR	3	Pgap1
2q36.1	2:222566899-222656092	FARSB, FARSLB, RILDBC1	Phenylalanine-tRNA synthetase-like, beta subunit	609690	FARSB	10056	ENSG00000116120,ENST00000281828;;;ENST00000281828		Rajab interstitial lung disease with brain calcifications 1	613658	AR	3	Farsb
2q37.2	2:236161340-236168386	GBX2	Gastrulation brain homeobox 2	601135	GBX2	2637	ENSG00000168505,ENST00000306318;;;ENST00000306318					Gbx2
3p26.1	3:6861115-7741533	GRM7, MGLUR7, NEDSHBA	Glutamate receptor, metabotropic, 7	604101	GRM7	2917	ENSG00000196277,ENST00000357716;;;ENST00000357716		Neurodevelopmental disorder with seizures, hypotonia, and brain abnormalities	618922	AR	3	Grm7
3p22.1	3:43079234-43106079	POMGNT2, GTDC2, C3orf39, AGO61, MDDGA8, MDDGC8	Protein O-mannose beta-1,2-N-acetylglucosaminyltransferase 2	614828	POMGNT2	84892	ENSG00000144647,ENST00000344697;;;ENST00000344697		Muscular dystrophy-dystroglycanopathy (congenital with brain and eye anomalies), type A, 8	614830	AR	3	Pomgnt2
3p22.1	3:43079234-43106079	POMGNT2, GTDC2, C3orf39, AGO61, MDDGA8, MDDGC8	Protein O-mannose beta-1,2-N-acetylglucosaminyltransferase 2	614828	POMGNT2	84892	ENSG00000144647,ENST00000344697;;;ENST00000344697		Muscular dystrophy-dystroglycanopathy (limb-girdle) type C, 8	618135	AR	3	Pomgnt2
3p21.31	3:47381021-47413435	PTPN23, KIAA1471, HDPTP, NEDBASS	Protein-tyrosine phosphatase, nonreceptor-type, 23	606584	PTPN23	25930	ENSG00000076201,ENST00000265562;;;ENST00000265562		Neurodevelopmental disorder and structural brain anomalies with or without seizures and spasticity	618890	AR	3	Ptpn23
3p21.31	3:49359145-49411976	RHOA, ARHA, ARH12, RHOH12, EDFAOB	Ras homolog gene family, member A (oncogene RHO H12)	165390	RHOA	387	ENSG00000067560,ENST00000418115;;;ENST00000418115		Ectodermal dysplasia with facial dysmorphism and acral, ocular, and brain anomalies, somatic mosaic	618727		3	Rhoa
3p21.31	3:49468948-49535615	DAG1, DAG, MDDGC9, MDDGA9, LGMDR16	Dystrophin-associated glycoprotein-1	128239	DAG1	1605	ENSG00000173402,ENST00000308775;;;ENST00000308775		Muscular dystrophy-dystroglycanopathy (congenital with brain and eye anomalies), type A, 9	616538	AR	3	Dag1
3p21.31	3:49468948-49535615	DAG1, DAG, MDDGC9, MDDGA9, LGMDR16	Dystrophin-associated glycoprotein-1	128239	DAG1	1605	ENSG00000173402,ENST00000308775;;;ENST00000308775		Muscular dystrophy-dystroglycanopathy (limb-girdle), type C, 9	613818	AR	3	Dag1
3p21.31	3:49719916-49723951	GMPPB, KIAA1851, MDDGA14, MDDGB14, MDDGC14, LGMDR19	GDP-mannose pyrophosphorylase B	615320	GMPPB	29925	ENSG00000173540,ENST00000308388;;;ENST00000308388		Muscular dystrophy-dystroglycanopathy (congenital with brain and eye anomalies), type A, 14	615350	AR	3	Gmppb
3p21.31	3:49719916-49723951	GMPPB, KIAA1851, MDDGA14, MDDGB14, MDDGC14, LGMDR19	GDP-mannose pyrophosphorylase B	615320	GMPPB	29925	ENSG00000173540,ENST00000308388;;;ENST00000308388		Muscular dystrophy-dystroglycanopathy (congenital with impaired intellectual development), type B, 14	615351	AR	3	Gmppb
3p21.31	3:49719916-49723951	GMPPB, KIAA1851, MDDGA14, MDDGB14, MDDGC14, LGMDR19	GDP-mannose pyrophosphorylase B	615320	GMPPB	29925	ENSG00000173540,ENST00000308388;;;ENST00000308388		Muscular dystrophy-dystroglycanopathy (limb-girdle), type C, 14	615352	AR	3	Gmppb
3q24	3:147409365-147416719	ZIC1, CRS6, BAIDCS	Zic family, member 1	600470	ZIC1	7545	ENSG00000152977,ENST00000282928;;;ENST00000282928	mutation identified in 1 CRS6 family	?Craniosynostosis 6	616602	AD	3	Zic1
3q24	3:147409365-147416719	ZIC1, CRS6, BAIDCS	Zic family, member 1	600470	ZIC1	7545	ENSG00000152977,ENST00000282928;;;ENST00000282928	mutation identified in 1 CRS6 family	Structural brain anomalies with impaired intellectual development and craniosynostosis	618736	AD	3	Zic1
3q29	3:196639694-196662004	NRROS, LRRC33, SENEBAC	Negative regulator of oxygen species	615322	NRROS	375387	ENSG00000174004,ENST00000328557;;;ENST00000328557		Seizures, early-onset, with neurodegeneration and brain calcification	618875	AR	3	Nrros
4q28.1	4:122923078-123319433	AFG2A, SPATA5, SPAF, NEDHSB	AFG2 AAA ATPase homolog A	613940	AFG2A	166378	ENSG00000145375,ENST00000274008;;;ENST00000274008		Neurodevelopmental disorder with hearing loss, seizures, and brain abnormalities	616577	AR	3	Afg2a
4q33	4:169620578-169723673	CLCN3, NEDHYBA, NEDSBA	Chloride channel-3	600580	CLCN3	1182	ENSG00000109572,ENST00000513761;;;ENST00000513761	mutation identified in 1 NEDSBA family	Neurodevelopmental disorder with hypotonia and brain abnormalities	619512	AD	3	Clcn3
4q33	4:169620578-169723673	CLCN3, NEDHYBA, NEDSBA	Chloride channel-3	600580	CLCN3	1182	ENSG00000109572,ENST00000513761;;;ENST00000513761	mutation identified in 1 NEDSBA family	Neurodevelopmental disorder with seizures and brain abnormalities	619517	AR	3	Clcn3
5p15.31	5:7396138-7830081	ADCY2	Adenylyl cyclase-2, brain	103071	ADCY2	108	ENSG00000078295,ENST00000338316;;;ENST00000338316					Adcy2
5p15.1	5:17216823-17276834	BASP1, CAP23, NAP22	Brain-abundant signal protein, membrane-attached, 1	605940	BASP1	10409	ENSG00000176788,ENST00000322611;;;ENST00000322611					Basp1
5p13.2	5:36098407-36151887	LMBRD2, DENBA	LMBR1 domain-containing protein 2	619490	LMBRD2	92255	ENSG00000164187,ENST00000296603;;;ENST00000296603		Developmental delay with variable neurologic and brain abnormalities	619694	AD	3	Lmbrd2
5q12.1	5:62306206-62391025	KIF2A, CDCBM3	Kinesin, heavy chain, 2	602591	KIF2A	3796	ENSG00000068796,ENST00000407818;;;ENST00000407818		Cortical dysplasia, complex, with other brain malformations 3	615411	AD	3	Kif2a
5q22.1	5:111223583-111494886	CAMK4	Ca(2+)-calmodulin-dependent protein kinase type IV of brain	114080	CAMK4	814	ENSG00000152495,ENST00000282356;;;ENST00000282356					Camk4
5q22.2	5:112707498-112846239	APC, GS, FPC, BTPS2, DESMD	APC regulator of WNT signaling pathway	611731	APC	324	ENSG00000134982,ENST00000257430;;;ENST00000257430	150kb distal to MCC	Adenoma, periampullary, somatic	175100		3	Apc
5q22.2	5:112707498-112846239	APC, GS, FPC, BTPS2, DESMD	APC regulator of WNT signaling pathway	611731	APC	324	ENSG00000134982,ENST00000257430;;;ENST00000257430	150kb distal to MCC	Adenomatous polyposis coli	175100	AD	3	Apc
5q22.2	5:112707498-112846239	APC, GS, FPC, BTPS2, DESMD	APC regulator of WNT signaling pathway	611731	APC	324	ENSG00000134982,ENST00000257430;;;ENST00000257430	150kb distal to MCC	Brain tumor-polyposis syndrome 2	175100	AD	3	Apc
5q22.2	5:112707498-112846239	APC, GS, FPC, BTPS2, DESMD	APC regulator of WNT signaling pathway	611731	APC	324	ENSG00000134982,ENST00000257430;;;ENST00000257430	150kb distal to MCC	Colorectal cancer, somatic	114500		3	Apc
5q22.2	5:112707498-112846239	APC, GS, FPC, BTPS2, DESMD	APC regulator of WNT signaling pathway	611731	APC	324	ENSG00000134982,ENST00000257430;;;ENST00000257430	150kb distal to MCC	Desmoid disease, hereditary	135290	AD	3	Apc
5q22.2	5:112707498-112846239	APC, GS, FPC, BTPS2, DESMD	APC regulator of WNT signaling pathway	611731	APC	324	ENSG00000134982,ENST00000257430;;;ENST00000257430	150kb distal to MCC	Gardner syndrome	175100	AD	3	Apc
5q22.2	5:112707498-112846239	APC, GS, FPC, BTPS2, DESMD	APC regulator of WNT signaling pathway	611731	APC	324	ENSG00000134982,ENST00000257430;;;ENST00000257430	150kb distal to MCC	Gastric adenocarcinoma and proximal polyposis of the stomach	619182	AD	3	Apc
5q22.2	5:112707498-112846239	APC, GS, FPC, BTPS2, DESMD	APC regulator of WNT signaling pathway	611731	APC	324	ENSG00000134982,ENST00000257430;;;ENST00000257430	150kb distal to MCC	Gastric cancer, somatic	613659		3	Apc
5q22.2	5:112707498-112846239	APC, GS, FPC, BTPS2, DESMD	APC regulator of WNT signaling pathway	611731	APC	324	ENSG00000134982,ENST00000257430;;;ENST00000257430	150kb distal to MCC	Hepatoblastoma, somatic	114550		3	Apc
5q32	5:150053295-150113365	CSF1R, FMS, HDLS1, BANDDOS	Colony-stimulating factor-1 receptor; oncogene FMS (McDonough feline sarcoma)	164770	CSF1R	1436	ENSG00000182578,ENST00000675795;;;ENST00000675795	FMS2 is 5' end	Brain abnormalities, neurodegeneration, and dysosteosclerosis	618476	AR	3	Csf1r
5q32	5:150053295-150113365	CSF1R, FMS, HDLS1, BANDDOS	Colony-stimulating factor-1 receptor; oncogene FMS (McDonough feline sarcoma)	164770	CSF1R	1436	ENSG00000182578,ENST00000675795;;;ENST00000675795	FMS2 is 5' end	Leukoencephalopathy, diffuse hereditary, with spheroids 1	221820	AD	3	Csf1r
6p25.2	6:3153666-3157544	TUBB2A, CDCBM5	Tubulin, beta-2A	615101	TUBB2A	7280	ENSG00000137267,ENST00000333628;;;ENST00000333628		Cortical dysplasia, complex, with other brain malformations 5	615763	AD	3	Tubb2a
6p25.2	6:3224277-3227653	TUBB2B, CDCBM7	Tubulin, beta-2B	612850	TUBB2B	347733	ENSG00000137285,ENST00000259818;;;ENST00000259818	TUBB2A is 70kb telomeric to TUBB2B	Cortical dysplasia, complex, with other brain malformations 7	610031	AD	3	Tubb2b
6p21.33	6:30720352-30725422	TUBB, TUBB5, M40, CDCBM6, CSCSC1	Tubulin, beta polypeptide	191130	TUBB	203068	ENSG00000196230,ENST00000327892;;;ENST00000327892		Cortical dysplasia, complex, with other brain malformations 6	615771	AD	3	Tubb5
6p21.33	6:30720352-30725422	TUBB, TUBB5, M40, CDCBM6, CSCSC1	Tubulin, beta polypeptide	191130	TUBB	203068	ENSG00000196230,ENST00000327892;;;ENST00000327892		Symmetric circumferential skin creases, congenital, 1	156610	AD	3	Tubb5
6p21.33	6:31353875-31357179	HLA-B, SPDA1	Major histocompatibility complex, class I, B	142830	HLA-B	3106	ENSG00000234745,ENST00000412585;;;ENST00000412585		{Abacavir hypersensitivity, susceptibility to}			3	H2-D1,H2-K1,H2-M1,H2-M10.1,H2-M10.2,H2-M10.3,H2-M10.4,H2-M10.5,H2-M10.6,H2-M11,H2-M2,H2-M5,H2-M9,H2-Q1,H2-Q10,H2-Q2,H2-Q4,H2-Q6,H2-Q7,H2-T10,H2-T22,H2-T3
6p21.33	6:31353875-31357179	HLA-B, SPDA1	Major histocompatibility complex, class I, B	142830	HLA-B	3106	ENSG00000234745,ENST00000412585;;;ENST00000412585		{Drug-induced liver injury due to flucloxacillin}			3	H2-D1,H2-K1,H2-M1,H2-M10.1,H2-M10.2,H2-M10.3,H2-M10.4,H2-M10.5,H2-M10.6,H2-M11,H2-M2,H2-M5,H2-M9,H2-Q1,H2-Q10,H2-Q2,H2-Q4,H2-Q6,H2-Q7,H2-T10,H2-T22,H2-T3
6p21.33	6:31353875-31357179	HLA-B, SPDA1	Major histocompatibility complex, class I, B	142830	HLA-B	3106	ENSG00000234745,ENST00000412585;;;ENST00000412585		{Spondyloarthropathy, susceptibility to, 1}	106300	Mu	3	H2-D1,H2-K1,H2-M1,H2-M10.1,H2-M10.2,H2-M10.3,H2-M10.4,H2-M10.5,H2-M10.6,H2-M11,H2-M2,H2-M5,H2-M9,H2-Q1,H2-Q10,H2-Q2,H2-Q4,H2-Q6,H2-Q7,H2-T10,H2-T22,H2-T3
6p21.33	6:31353875-31357179	HLA-B, SPDA1	Major histocompatibility complex, class I, B	142830	HLA-B	3106	ENSG00000234745,ENST00000412585;;;ENST00000412585		{Stevens-Johnson syndrome, susceptibility to}	608579		3	H2-D1,H2-K1,H2-M1,H2-M10.1,H2-M10.2,H2-M10.3,H2-M10.4,H2-M10.5,H2-M10.6,H2-M11,H2-M2,H2-M5,H2-M9,H2-Q1,H2-Q10,H2-Q2,H2-Q4,H2-Q6,H2-Q7,H2-T10,H2-T22,H2-T3
6p21.33	6:31353875-31357179	HLA-B, SPDA1	Major histocompatibility complex, class I, B	142830	HLA-B	3106	ENSG00000234745,ENST00000412585;;;ENST00000412585		{Synovitis, chronic, susceptibility to}			3	H2-D1,H2-K1,H2-M1,H2-M10.1,H2-M10.2,H2-M10.3,H2-M10.4,H2-M10.5,H2-M10.6,H2-M11,H2-M2,H2-M5,H2-M9,H2-Q1,H2-Q10,H2-Q2,H2-Q4,H2-Q6,H2-Q7,H2-T10,H2-T22,H2-T3
6p21.33	6:31353875-31357179	HLA-B, SPDA1	Major histocompatibility complex, class I, B	142830	HLA-B	3106	ENSG00000234745,ENST00000412585;;;ENST00000412585		{Toxic epidermal necrolysis, susceptibility to}	608579		3	H2-D1,H2-K1,H2-M1,H2-M10.1,H2-M10.2,H2-M10.3,H2-M10.4,H2-M10.5,H2-M10.6,H2-M11,H2-M2,H2-M5,H2-M9,H2-Q1,H2-Q10,H2-Q2,H2-Q4,H2-Q6,H2-Q7,H2-T10,H2-T22,H2-T3
6p21.1	6:42050524-42087462	TAF8, TBN, NEDMLHB	TATA-box binding protein-associated factor 8	609514	TAF8	129685	ENSG00000137413,ENST00000372977;;;ENST00000372977		Neurodevelopmental disorder with severe motor impairment, absent language, cerebral hypomyelination, and brain atrophy	619972	AR	3	Taf8
6q15	6:88139864-88167349	CNR1	Cannabinoid receptor-1, brain	114610	CNR1	1268	ENSG00000118432,ENST00000369501;;;ENST00000369501					Cnr1
6q24.1	6:138903493-138988253	REPS1, NBIA7	RALBP1-associated EPS domain-containing protein 1	614825	REPS1	85021	ENSG00000135597,ENST00000450536;;;ENST00000450536	mutation identified in 1 NBIA7 family	?Neurodegeneration with brain iron accumulation 7	617916	AR	3	Reps1
6q27	6:170282206-170291078	DLL1, DELTA1, NEDBAS	Delta-like canonical Notch ligand 1	606582	DLL1	28514	ENSG00000198719,ENST00000366756;;;ENST00000366756		Neurodevelopmental disorder with nonspecific brain abnormalities and with or without seizures	618709	AD	3	Dll1
7p21.2	7:16087525-16421538	CRPPA, ISPD, MDDGA7, MDDGC7, LGMDR20	CDP-L-ribitol pyrophosphorylase A	614631	CRPPA	729920	ENSG00000214960,ENST00000407010;;;ENST00000407010		Muscular dystrophy-dystroglycanopathy (congenital with brain and eye anomalies), type A, 7	614643	AR	3	Crppa
7p21.2	7:16087525-16421538	CRPPA, ISPD, MDDGA7, MDDGC7, LGMDR20	CDP-L-ribitol pyrophosphorylase A	614631	CRPPA	729920	ENSG00000214960,ENST00000407010;;;ENST00000407010		Muscular dystrophy-dystroglycanopathy (limb-girdle), type C, 7	616052	AR	3	Crppa
7p15.3	7:22727200-22731998	IL6, IFNB2, BSF2, HSF, HGF	Interleukin-6 (interferon, beta-2)	147620	IL6	3569	ENSG00000136244,ENST00000258743;;;ENST00000258743		{Crohn disease-associated growth failure}	266600	Mu	3	Il6
7p15.3	7:22727200-22731998	IL6, IFNB2, BSF2, HSF, HGF	Interleukin-6 (interferon, beta-2)	147620	IL6	3569	ENSG00000136244,ENST00000258743;;;ENST00000258743		{Intracranial hemorrhage in brain cerebrovascular malformations, susceptibility to}	108010	SMu	3	Il6
7p15.3	7:22727200-22731998	IL6, IFNB2, BSF2, HSF, HGF	Interleukin-6 (interferon, beta-2)	147620	IL6	3569	ENSG00000136244,ENST00000258743;;;ENST00000258743		{Kaposi sarcoma in HIV+, susceptibility to}	148000	AD	3	Il6
7p15.3	7:22727200-22731998	IL6, IFNB2, BSF2, HSF, HGF	Interleukin-6 (interferon, beta-2)	147620	IL6	3569	ENSG00000136244,ENST00000258743;;;ENST00000258743		{Rheumatoid arthritis, systemic juvenile}	604302		3	Il6
7p15.3	7:22727200-22731998	IL6, IFNB2, BSF2, HSF, HGF	Interleukin-6 (interferon, beta-2)	147620	IL6	3569	ENSG00000136244,ENST00000258743;;;ENST00000258743		{Type 1 diabetes mellitus}	222100	AR	3	Il6
7p15.3	7:22727200-22731998	IL6, IFNB2, BSF2, HSF, HGF	Interleukin-6 (interferon, beta-2)	147620	IL6	3569	ENSG00000136244,ENST00000258743;;;ENST00000258743		{Type 2 diabetes mellitus}	125853	AD	3	Il6
7p12.3	7:45574140-45723116	ADCY1, DFNB44	Adenylate cyclase-1, brain	103072	ADCY1	107	ENSG00000164742,ENST00000297323;;;ENST00000297323	mutation identified in 1 DFNB44 family	?Deafness, autosomal recessive 44	610154	AR	3	Adcy1
7q11.23	7:73699210-73719669	STX1A, STX1	Syntaxin 1A, brain	186590	STX1A	6804	ENSG00000106089,ENST00000222812;;;ENST00000222812					Stx1a
7q21.3	7:98281686-98323430	BRI3	Brain protein I3	615628	BRI3	25798	ENSG00000164713,ENST00000297290;;;ENST00000297290					Bri3
7q36.1	7:151148009-151167694	GBX1	Gastrulation brain homeobox 1	603354	GBX1	2636	ENSG00000164900,ENST00000297537;;;ENST00000297537					Gbx1
7q36.1	7:151466012-151519895	RHEB, RHEB2	Ras homolog enriched in brain	601293	RHEB	6009	ENSG00000106615,ENST00000262187;;;ENST00000262187					Rheb
8p11.21	8:43093515-43123434	POMK, SGK196, MDDGA12, MDDGC12	Protein-O-mannose kinase	615247	POMK	84197	ENSG00000185900,ENST00000331373;;;ENST00000331373	mutation in 1 MDDGC12 family has been reported	?Muscular dystrophy-dystroglycanopathy (limb-girdle), type C, 12	616094	AR	3	Pomk
8p11.21	8:43093515-43123434	POMK, SGK196, MDDGA12, MDDGC12	Protein-O-mannose kinase	615247	POMK	84197	ENSG00000185900,ENST00000331373;;;ENST00000331373	mutation in 1 MDDGC12 family has been reported	Muscular dystrophy-dystroglycanopathy (congenital with brain and eye anomalies), type A, 12	615249	AR	3	Pomk
8q22.3	8:103140725-103230305	BAALC	Brain and acute leukemia gene, cytoplasmic	606602	BAALC	79870	ENSG00000164929,ENST00000309982;;;ENST00000309982					Baalc
8q24.22	8:130780301-131040909	ADCY8, ADCY3	Adenylyl cyclase-8, brain	103070	ADCY8	114	ENSG00000155897,ENST00000286355;;;ENST00000286355					Adcy8
9p23	9:13105707-13279692	MPDZ, MUPP1, HYC2	Multiple PDZ domain protein	603785	MPDZ	8777	ENSG00000107186,ENST00000319217;;;ENST00000319217		Hydrocephalus, congenital, 2, with or without brain or eye anomalies	615219	AR	3	Mpdz
9p21.2	9:26903372-26947242	PLAA, PLAP, NDMSBA	Phospholipase A2-activating protein	603873	PLAA	9373	ENSG00000137055,ENST00000397292;;;ENST00000397292		Neurodevelopmental disorder with progressive microcephaly, spasticity, and brain anomalies	617527	AR	3	Plaa
9q31.2	9:105558130-105641118	FKTN, FCMD, CMD1X, LGMDR13, MDDGA4, MDDGB4, MDDGC4	Fukutin	607440	FKTN	2218	ENSG00000106692,ENST00000357998;;;ENST00000357998		Cardiomyopathy, dilated, 1X	611615	AR	3	Fktn
9q31.2	9:105558130-105641118	FKTN, FCMD, CMD1X, LGMDR13, MDDGA4, MDDGB4, MDDGC4	Fukutin	607440	FKTN	2218	ENSG00000106692,ENST00000357998;;;ENST00000357998		Muscular dystrophy-dystroglycanopathy (congenital with brain and eye anomalies), type A, 4	253800	AR	3	Fktn
9q31.2	9:105558130-105641118	FKTN, FCMD, CMD1X, LGMDR13, MDDGA4, MDDGB4, MDDGC4	Fukutin	607440	FKTN	2218	ENSG00000106692,ENST00000357998;;;ENST00000357998		Muscular dystrophy-dystroglycanopathy (congenital without impaired intellectual development), type B, 4	613152	AR	3	Fktn
9q31.2	9:105558130-105641118	FKTN, FCMD, CMD1X, LGMDR13, MDDGA4, MDDGB4, MDDGC4	Fukutin	607440	FKTN	2218	ENSG00000106692,ENST00000357998;;;ENST00000357998		Muscular dystrophy-dystroglycanopathy (limb-girdle), type C, 4	611588	AR	3	Fktn
9q34.11	9:128255829-128276007	GOLGA2, GM130, DEDHMB	Golgin A2	602580	GOLGA2	2801	ENSG00000167110,ENST00000611957;;;ENST00000611957		Developmental delay with hypotonia, myopathy, and brain abnormalities	620240	AR	3	Golga2
9q34.11	9:129094794-129110793	CRAT, CAT1, NBIA8	Carnitine acetyltransferase	600184	CRAT	1384	ENSG00000095321,ENST00000318080;;;ENST00000318080	mutation identified in 1 NBIA8 patient	?Neurodegeneration with brain iron accumulation 8	617917	AR	3	Crat
9q34.13	9:131502918-131523799	POMT1, MDDGA1, MDDGB1, MDDGC1, LGMDR11	Protein O-mannosyltransferase 1	607423	POMT1	10585	ENSG00000130714,ENST00000402686;;;ENST00000402686		Muscular dystrophy-dystroglycanopathy (congenital with brain and eye anomalies), type A, 1	236670	AR	3	Pomt1
9q34.13	9:131502918-131523799	POMT1, MDDGA1, MDDGB1, MDDGC1, LGMDR11	Protein O-mannosyltransferase 1	607423	POMT1	10585	ENSG00000130714,ENST00000402686;;;ENST00000402686		Muscular dystrophy-dystroglycanopathy (congenital with impaired intellectual development), type B, 1	613155	AR	3	Pomt1
9q34.13	9:131502918-131523799	POMT1, MDDGA1, MDDGB1, MDDGC1, LGMDR11	Protein O-mannosyltransferase 1	607423	POMT1	10585	ENSG00000130714,ENST00000402686;;;ENST00000402686		Muscular dystrophy-dystroglycanopathy (limb-girdle), type C, 1	609308	AR	3	Pomt1
9q34.3	9:135808487-135907546	CAMSAP1, CDCBM12	Calmodulin-regulated spectrin-associated protein 1	613774	CAMSAP1	157922	ENSG00000130559,ENST00000389532;;;ENST00000389532		Cortical dysplasia, complex, with other brain malformations 12	620316	AR	3	Camsap1
9q34.3	9:136977504-136981742	PTGDS	Prostaglandin D2 synthase (21kD, brain)	176803	PTGDS	5730	ENSG00000107317,ENST00000371625;;;ENST00000371625	distal to ABL				Ptgds
10q22.1	10:69270000-69401882	HK1, HKD, HMSNR, RP79, NEDVIBA	Hexokinase-1	142600	HK1	3098	ENSG00000156515,ENST00000359426;;;ENST00000359426		Hemolytic anemia due to hexokinase deficiency	235700	AR	3	Hk1
10q22.1	10:69270000-69401882	HK1, HKD, HMSNR, RP79, NEDVIBA	Hexokinase-1	142600	HK1	3098	ENSG00000156515,ENST00000359426;;;ENST00000359426		Neurodevelopmental disorder with visual defects and brain anomalies	618547	AD	3	Hk1
10q22.1	10:69270000-69401882	HK1, HKD, HMSNR, RP79, NEDVIBA	Hexokinase-1	142600	HK1	3098	ENSG00000156515,ENST00000359426;;;ENST00000359426		Neuropathy, hereditary motor and sensory, Russe type	605285	AR	3	Hk1
10q22.1	10:69270000-69401882	HK1, HKD, HMSNR, RP79, NEDVIBA	Hexokinase-1	142600	HK1	3098	ENSG00000156515,ENST00000359426;;;ENST00000359426		Retinitis pigmentosa 79	617460	AD	3	Hk1
10q22.3	10:80150889-80205808	ANXA11, ANX11, ALS23, IBMWMA	Annexin A11 (annexin XI)	602572	ANXA11	311	ENSG00000122359,ENST00000422982;;;ENST00000422982		Amyotrophic lateral sclerosis 23	617839	AD	3	Anxa11
10q22.3	10:80150889-80205808	ANXA11, ANX11, ALS23, IBMWMA	Annexin A11 (annexin XI)	602572	ANXA11	311	ENSG00000122359,ENST00000422982;;;ENST00000422982		Inclusion body myopathy and brain white matter abnormalities	619733	AD	3	Anxa11
10q24.2	10:97640671-97676434	PI4K2A, NEDMSB	Phosphatidylinositol 4-kinase type 2 alpha	609763	PI4K2A	55361	ENSG00000155252,ENST00000370631;;;ENST00000370631		Neurodevelopmental disorder with hyperkinetic movements, seizures and structural brain abnormalities	620732	AR	3	Pi4k2a
10q26.13	10:122560754-122643736	DMBT1	Deleted in malignant brain tumors 1	601969	DMBT1	1755	ENSG00000187908,ENST00000338354;;;ENST00000338354					Dmbt1
11p15.1	11:20156155-20160475	DBX1, HLX1	Developing brain homeobox 1	619830	DBX1	120237	ENSG00000109851,ENST00000524983;;;ENST00000524983					Dbx1
11p14.1	11:27654893-27722030	BDNF	Brain-derived neurotrophic factor	113505	BDNF	627	ENSG00000176697,ENST00000356660;;;ENST00000356660	homeology with NRF3 on 12p; at p14 boundary				Bdnf
11q12.3	11:61964285-61967634	FTH1, FTHL6, HFE5, NBIA9	Ferritin, heavy polypeptide 1	134770	FTH1	2495	ENSG00000167996,ENST00000273550;;;ENST00000273550	mutation identified in 1 HFE5 family	?Hemochromatosis, type 5	615517	AD	3	Fth1
11q12.3	11:61964285-61967634	FTH1, FTHL6, HFE5, NBIA9	Ferritin, heavy polypeptide 1	134770	FTH1	2495	ENSG00000167996,ENST00000273550;;;ENST00000273550	mutation identified in 1 HFE5 family	Neurodegeneration with brain iron accumulation 9	620669	AD	3	Fth1
11q13.1	11:65712018-65719604	KAT5, HTATIP, TIP60, ESA1, PLIP, NEDFASB	Lysine acetyltransferase 5	601409	KAT5	10524	ENSG00000172977,ENST00000341318;;;ENST00000341318		Neurodevelopmental disorder with dysmorphic facies, sleep disturbance, and brain abnormalities	619103	AD	3	Kat5
11q13.2	11:66345374-66347629	B4GAT1, B3GNT1, IGNT, IGAT, MDDGA13	Beta-1,4glucuronyltransferase 1	605517	B4GAT1	11041	ENSG00000174684,ENST00000311181;;;ENST00000311181		Muscular dystrophy-dystroglycanopathy (congenital with brain and eye anomalies), type A, 13	615287	AR	3	B4gat1
11q13.4	11:74490519-74493724	LIPT2	Lipoyl(octanoyl) transferase 2	617659	LIPT2	387787	ENSG00000175536,ENST00000310109;;;ENST00000310109		Encephalopathy, neonatal severe, with lactic acidosis and brain abnormalities	617668	AR	3	Lipt2
11q21	11:93784282-93814963	MED17, CRSP6, CRSP77, TRAP80, DRIP80	Mediator complex subunit 17	603810	MED17	9440	ENSG00000042429,ENST00000251871;;;ENST00000251871		Microcephaly, postnatal progressive, with seizures and brain atrophy	613668	AR	3	Med17
11q23.3	11:119018766-119024134	TRAPPC4, NEDESBA	Trafficking protein particle complex, subunit 4 (synbindin)	610971	TRAPPC4	51399	ENSG00000196655,ENST00000533632;;;ENST00000533632		Neurodevelopmental disorder with epilepsy, spasticity, and brain atrophy	618741	AR	3	Trappc4
11q24.1	11:122977570-122981834	BSX1	Brain-specific homeobox, mouse, homolog of	611074	BSX	390259	ENSG00000188909,ENST00000343035;;;ENST00000343035					Bsx
11q25	11:134069072-134152001	JAM3	Junctional adhesion molecule 3	606871	JAM3	83700	ENSG00000166086,ENST00000299106;;;ENST00000299106		Hemorrhagic destruction of the brain, subependymal calcification, and cataracts	613730	AR	3	Jam3
12p13.33	12:564296-663445	NINJ2	Nerve injury-induced protein 2	607297	NINJ2	4815	ENSG00000171840,ENST00000305108;;;ENST00000305108					Ninj2
12p12.3	12:16548372-16610174	LMO3, RBTNL2, RHOM3	LIM domain only 3 (rhombotin-like 2)	180386	LMO3	55885	ENSG00000048540,ENST00000537304;;;ENST00000537304	expressed mainly in brain				Lmo3
12p12.1	12:25205246-25250929	KRAS, KRAS2, RASK2, NS, CFC2, RALD, OES	KRAS protooncogene, GTPase	190070	KRAS	3845	ENSG00000133703,ENST00000311936;;;ENST00000311936	pseudogene KRAS1P on 6p12-p11	Arteriovenous malformation of the brain, somatic	108010		3	Kras
12p12.1	12:25205246-25250929	KRAS, KRAS2, RASK2, NS, CFC2, RALD, OES	KRAS protooncogene, GTPase	190070	KRAS	3845	ENSG00000133703,ENST00000311936;;;ENST00000311936	pseudogene KRAS1P on 6p12-p11	Bladder cancer, somatic	109800		3	Kras
12p12.1	12:25205246-25250929	KRAS, KRAS2, RASK2, NS, CFC2, RALD, OES	KRAS protooncogene, GTPase	190070	KRAS	3845	ENSG00000133703,ENST00000311936;;;ENST00000311936	pseudogene KRAS1P on 6p12-p11	Breast cancer, somatic	114480		3	Kras
12p12.1	12:25205246-25250929	KRAS, KRAS2, RASK2, NS, CFC2, RALD, OES	KRAS protooncogene, GTPase	190070	KRAS	3845	ENSG00000133703,ENST00000311936;;;ENST00000311936	pseudogene KRAS1P on 6p12-p11	Cardiofaciocutaneous syndrome 2	615278	AD	3	Kras
12p12.1	12:25205246-25250929	KRAS, KRAS2, RASK2, NS, CFC2, RALD, OES	KRAS protooncogene, GTPase	190070	KRAS	3845	ENSG00000133703,ENST00000311936;;;ENST00000311936	pseudogene KRAS1P on 6p12-p11	Gastric cancer, somatic	613659		3	Kras
12p12.1	12:25205246-25250929	KRAS, KRAS2, RASK2, NS, CFC2, RALD, OES	KRAS protooncogene, GTPase	190070	KRAS	3845	ENSG00000133703,ENST00000311936;;;ENST00000311936	pseudogene KRAS1P on 6p12-p11	Leukemia, acute myeloid, somatic	601626		3	Kras
12p12.1	12:25205246-25250929	KRAS, KRAS2, RASK2, NS, CFC2, RALD, OES	KRAS protooncogene, GTPase	190070	KRAS	3845	ENSG00000133703,ENST00000311936;;;ENST00000311936	pseudogene KRAS1P on 6p12-p11	Lung cancer, somatic	211980		3	Kras
12p12.1	12:25205246-25250929	KRAS, KRAS2, RASK2, NS, CFC2, RALD, OES	KRAS protooncogene, GTPase	190070	KRAS	3845	ENSG00000133703,ENST00000311936;;;ENST00000311936	pseudogene KRAS1P on 6p12-p11	Noonan syndrome 3	609942	AD	3	Kras
12p12.1	12:25205246-25250929	KRAS, KRAS2, RASK2, NS, CFC2, RALD, OES	KRAS protooncogene, GTPase	190070	KRAS	3845	ENSG00000133703,ENST00000311936;;;ENST00000311936	pseudogene KRAS1P on 6p12-p11	Oculoectodermal syndrome, somatic	600268		3	Kras
12p12.1	12:25205246-25250929	KRAS, KRAS2, RASK2, NS, CFC2, RALD, OES	KRAS protooncogene, GTPase	190070	KRAS	3845	ENSG00000133703,ENST00000311936;;;ENST00000311936	pseudogene KRAS1P on 6p12-p11	Pancreatic carcinoma, somatic	260350		3	Kras
12p12.1	12:25205246-25250929	KRAS, KRAS2, RASK2, NS, CFC2, RALD, OES	KRAS protooncogene, GTPase	190070	KRAS	3845	ENSG00000133703,ENST00000311936;;;ENST00000311936	pseudogene KRAS1P on 6p12-p11	RAS-associated autoimmune leukoproliferative disorder	614470	AD	3	Kras
12p12.1	12:25205246-25250929	KRAS, KRAS2, RASK2, NS, CFC2, RALD, OES	KRAS protooncogene, GTPase	190070	KRAS	3845	ENSG00000133703,ENST00000311936;;;ENST00000311936	pseudogene KRAS1P on 6p12-p11	Schimmelpenning-Feuerstein-Mims syndrome, somatic mosaic	163200		3	Kras
12p11.23-p11.22	12:27524206-27695564	PPFIBP1, NEDSMBA	PPFIA-binding protein 1	603141	PPFIBP1	8496	ENSG00000110841,ENST00000228425;;;ENST00000228425		Neurodevelopmental disorder with seizures, microcephaly, and brain abnormalities	620024	AR	3	Ppfibp1
12q12	12:45014672-45051099	DBX2	Developing brain homeobox 2	620706	DBX2	440097	ENSG00000185610,ENST00000332700;;;ENST00000332700					Dbx2
12q13.3	12:57229711-57234935	SHMT2, GLYA, NEDCASB	Serine hydroxymethyltransferase	138450	SHMT2	6472	ENSG00000182199,ENST00000328923;;;ENST00000328923	glycine A auxotroph	Neurodevelopmental disorder with cardiomyopathy, spasticity, and brain abnormalities	619121	AR	3	Shmt2
12q14.2	12:63779909-63809562	RXYLT1, TMEM5, MDDGA10	Ribitol xylosyltransferase 1	605862	RXYLT1	10329	ENSG00000118600,ENST00000261234;;;ENST00000261234		Muscular dystrophy-dystroglycanopathy (congenital with brain and eye anomalies), type A, 10	615041	AR	3	Rxylt1
12q21.2-q21.31	12:79773563-79935460	PPP1R12A, MYPT1, GUBS	Protein phosphatase 1, regulatory subunit 12A (myosin phosphatase target subunit 1)	602021	PPP1R12A	4659	ENSG00000058272,ENST00000450142;;;ENST00000450142		Genitourinary and/or/brain malformation syndrome	618820	AD	3	Ppp1r12a
12q24.31	12:124946826-124989131	DHX37, KIAA1517, NEDBAVC, SRXY11	DEAH-box helicase 37	617362	DHX37	57647	ENSG00000150990,ENST00000308736;;;ENST00000308736		46XY sex reversal 11	273250	AD	3	Dhx37
12q24.31	12:124946826-124989131	DHX37, KIAA1517, NEDBAVC, SRXY11	DEAH-box helicase 37	617362	DHX37	57647	ENSG00000150990,ENST00000308736;;;ENST00000308736		Neurodevelopmental disorder with brain anomalies and with or without vertebral or cardiac anomalies	618731	AR	3	Dhx37
13q14.11	13:41061509-41084006	WBP4, FBP21, NEDHFDB	WW domain-containing binding protein 4	604981	WBP4	11193	ENSG00000120688,ENST00000379487;;;ENST00000379487		Neurodevelopemental disorder with hypotonia, feeding difficulties, facial dysmorphism, and brain abnormalities	620852	AR	3	Wbp4
13q34	13:110148963-110307157	COL4A1, BSVD1, HANAC, ICH, BSVD, RATOR, PADMAL	Collagen IV, alpha-1 polypeptide	120130	COL4A1	1282	ENSG00000187498,ENST00000375820;;;ENST00000375820	mutation identified in 1 RATOR family	?Retinal arteries, tortuosity of	180000	AD	3	Col4a1
13q34	13:110148963-110307157	COL4A1, BSVD1, HANAC, ICH, BSVD, RATOR, PADMAL	Collagen IV, alpha-1 polypeptide	120130	COL4A1	1282	ENSG00000187498,ENST00000375820;;;ENST00000375820	mutation identified in 1 RATOR family	{Hemorrhage, intracerebral, susceptibility to}	614519		3	Col4a1
13q34	13:110148963-110307157	COL4A1, BSVD1, HANAC, ICH, BSVD, RATOR, PADMAL	Collagen IV, alpha-1 polypeptide	120130	COL4A1	1282	ENSG00000187498,ENST00000375820;;;ENST00000375820	mutation identified in 1 RATOR family	Angiopathy, hereditary, with nephropathy, aneurysms, and muscle cramps	611773	AD	3	Col4a1
13q34	13:110148963-110307157	COL4A1, BSVD1, HANAC, ICH, BSVD, RATOR, PADMAL	Collagen IV, alpha-1 polypeptide	120130	COL4A1	1282	ENSG00000187498,ENST00000375820;;;ENST00000375820	mutation identified in 1 RATOR family	Brain small vessel disease with or without ocular anomalies	175780	AD	3	Col4a1
13q34	13:110148963-110307157	COL4A1, BSVD1, HANAC, ICH, BSVD, RATOR, PADMAL	Collagen IV, alpha-1 polypeptide	120130	COL4A1	1282	ENSG00000187498,ENST00000375820;;;ENST00000375820	mutation identified in 1 RATOR family	Microangiopathy and leukoencephalopathy, pontine, autosomal dominant	618564	AD	3	Col4a1
13q34	13:110307284-110513209	COL4A2, BSVD2, ICH	Collagen IV, alpha-2 polypeptide	120090	COL4A2	1284	ENSG00000134871,ENST00000360467;;;ENST00000360467		{Hemorrhage, intracerebral, susceptibility to}	614519		3	Col4a2
13q34	13:110307284-110513209	COL4A2, BSVD2, ICH	Collagen IV, alpha-2 polypeptide	120090	COL4A2	1284	ENSG00000134871,ENST00000360467;;;ENST00000360467		Brain small vessel disease 2	614483	AD	3	Col4a2
13q34	13:110615460-110639996	NAXD, CARKD, PEBEL2	NAD(P)HX dehydratase	615910	NAXD	55739	ENSG00000213995,ENST00000680254;;;ENST00000680254		Encephalopathy, progressive, early-onset, with brain edema and/or leukoencephalopathy, 2	618321	AR	3	Naxd
14q21.1	14:39147814-39170333	TRAPPC6B, TPC6, NEDMEBA	Trafficking protein particle complex, subunit 6B	610397	TRAPPC6B	122553	ENSG00000182400,ENST00000330149;;;ENST00000330149		Neurodevelopmental disorder with microcephaly, epilepsy, and brain atrophy	617862	AR	3	Trappc6b
14q24.3	14:77274956-77320883	POMT2, MDDGA2, MDDGB2, MDDGC2, LGMDR14	Putative protein O-mannosyltransferase 2	607439	POMT2	29954	ENSG00000009830,ENST00000261534;;;ENST00000261534		Muscular dystrophy-dystroglycanopathy (congenital with brain and eye anomalies), type A, 2	613150	AR	3	Pomt2
14q24.3	14:77274956-77320883	POMT2, MDDGA2, MDDGB2, MDDGC2, LGMDR14	Putative protein O-mannosyltransferase 2	607439	POMT2	29954	ENSG00000009830,ENST00000261534;;;ENST00000261534		Muscular dystrophy-dystroglycanopathy (congenital with impaired intellectual development), type B, 2	613156	AR	3	Pomt2
14q24.3	14:77274956-77320883	POMT2, MDDGA2, MDDGB2, MDDGC2, LGMDR14	Putative protein O-mannosyltransferase 2	607439	POMT2	29954	ENSG00000009830,ENST00000261534;;;ENST00000261534		Muscular dystrophy-dystroglycanopathy (limb-girdle), type C, 2	613158	AR	3	Pomt2
14q32	14:89300001-107043718	CKBE	Creatine kinase, ectopic expression	123270	CKBE	1156		linked to IGH, PI; ?same locus as CKBB	[Creatine kinase, brain type, ectopic expression of]	123270		2
14q32.2	14:100333790-100376327	WARS1, WARS, HMND9, NEDMSBA	Tryptophanyl-tRNA synthetase 1	191050	WARS1	7453	ENSG00000140105,ENST00000392882;;;ENST00000392882		Neurodevelopmental disorder with microcephaly and speech delay, with or without brain abnormalities	620317	AR	3	Wars1
14q32.2	14:100333790-100376327	WARS1, WARS, HMND9, NEDMSBA	Tryptophanyl-tRNA synthetase 1	191050	WARS1	7453	ENSG00000140105,ENST00000392882;;;ENST00000392882		Neuronopathy, distal hereditary motor, autosomal dominant 9	617721	AD	3	Wars1
14q32.2	14:100537147-100587417	BEGAIN	Brain-enriched guanylate kinase-associated protein	618597	BEGAIN	57596	ENSG00000183092,ENST00000554140;;;ENST00000554140					Begain
14q32.31	14:101964573-102056443	DYNC1H1, DNCL, DNECL, CMT2O, SMALED1, CDCBM13	Dynein, cytoplasmic-1, heavy chain-1	600112	DYNC1H1	1778	ENSG00000197102,ENST00000360184;;;ENST00000360184		Charcot-Marie-Tooth disease, axonal, type 2O	614228	AD	3	Dync1h1
14q32.31	14:101964573-102056443	DYNC1H1, DNCL, DNECL, CMT2O, SMALED1, CDCBM13	Dynein, cytoplasmic-1, heavy chain-1	600112	DYNC1H1	1778	ENSG00000197102,ENST00000360184;;;ENST00000360184		Cortical dysplasia, complex, with other brain malformations 13	614563	AD	3	Dync1h1
14q32.31	14:101964573-102056443	DYNC1H1, DNCL, DNECL, CMT2O, SMALED1, CDCBM13	Dynein, cytoplasmic-1, heavy chain-1	600112	DYNC1H1	1778	ENSG00000197102,ENST00000360184;;;ENST00000360184		Spinal muscular atrophy, lower extremity-predominant 1, AD	158600	AD	3	Dync1h1
14q32.33	14:103519667-103522830	CKB, CKBB, BCK	Creatine kinase, brain type	123280	CKB	1152	ENSG00000166165,ENST00000348956;;;ENST00000348956	distal to PI and AACT; closely linked to AKT1 and IGH; proximal to IGH				Ckb
14q32.33	14:104138587-104180894	KIF26A, KIAA1236, CDCBM11	Kinesin family member 26A	613231	KIF26A	26153	ENSG00000066735,ENST00000423312;;;ENST00000423312		Cortical dysplasia, complex, with other brain malformations 11	620156	AR	3	Kif26a
16p13.3	16:1706195-1770351	MAPK8IP3, SYD2, JSAP1, JIP3, NEDBA	Mitogen-activated protein kinase 8-interacting protein 3	605431	MAPK8IP3	23162	ENSG00000138834,ENST00000610761;;;ENST00000610761		Neurodevelopmental disorder with or without variable brain abnormalities	618443	AD	3	Mapk8ip3
16q21	16:57619738-57665567	ADGRG1, GPR56, TM7XN1, CDCBM15A, CDCBM14B	Adhesion G protein-coupled receptor G1	604110	ADGRG1	9289	ENSG00000205336,ENST00000562631;;;ENST00000562631		Cortical dysplasia, complex, with other brain malformations 14A, (bilateral frontoparietal)	606854	AR	3	Adgrg1
16q21	16:57619738-57665567	ADGRG1, GPR56, TM7XN1, CDCBM15A, CDCBM14B	Adhesion G protein-coupled receptor G1	604110	ADGRG1	9289	ENSG00000205336,ENST00000562631;;;ENST00000562631		Cortical dysplasia, complex, with other brain malformations 14B, (bilateral perisylvian)	615752		3	Adgrg1
16q21	16:66427295-66495288	BEAN1, BEAN, SCA31	Brain-expressed, associated with NEDD4	612051	BEAN1	146227	ENSG00000166546,ENST00000536005;;;ENST00000536005		Spinocerebellar ataxia 31	117210	AD	3	Bean1
16q24.3	16:89921925-89936097	TUBB3, TUBB4, CFEOM3A, CDCBM1	Tubulin, beta-3	602661	TUBB3	10381	ENSG00000258947,ENST00000315491;;;ENST00000315491		Cortical dysplasia, complex, with other brain malformations 1	614039	AD	3	Tubb3
16q24.3	16:89921925-89936097	TUBB3, TUBB4, CFEOM3A, CDCBM1	Tubulin, beta-3	602661	TUBB3	10381	ENSG00000258947,ENST00000315491;;;ENST00000315491		Fibrosis of extraocular muscles, congenital, 3A	600638	AD	3	Tubb3
17p13.3	17:1716523-1738585	WDR81, CAMRQ2, HYC3	WD repeat-containing protein 81	614218	WDR81	124997	ENSG00000167716,ENST00000409644;;;ENST00000409644		Cerebellar ataxia, impaired intellectual development, and dysquilibrium syndrome 2	610185	AR	3	Wdr81
17p13.3	17:1716523-1738585	WDR81, CAMRQ2, HYC3	WD repeat-containing protein 81	614218	WDR81	124997	ENSG00000167716,ENST00000409644;;;ENST00000409644		Hydrocephalus, congenital, 3, with brain anomalies	617967	AR	3	Wdr81
17p13.2	17:4731428-4733607	MED11, NDDRSB	Mediator complex subunit 11	612383	MED11	400569	ENSG00000161920,ENST00000293777;;;ENST00000293777		Neurodegeneration with developmental delay, early respiratory failure, myoclonic seizures, and brain abnormalities	620327	AR	3	Med11
17p13.1	17:8173452-8173588	SNORD118, LCC	Small nucleolar RNA, C/D box, 118	616663	SNORD118	727676	ENSG00000200463,ENST00000363593		Leukoencephalopathy, brain calcifications, and cysts	614561	AR	3
17q11.2	17:28363506-28365199	SEBOX, OG9	Skin-, embryo-, brain-, and oocyte-specific homeobox	610975	SEBOX	645832	ENSG00000274529,ENST00000536498;;;ENST00000536498					Sebox
17q11.2	17:30116816-30186475	NSRP1, NSRP70, CCDC55, NEDSSBA	Nuclear speckle splicing regulatory protein 1	616173	NSRP1	84081	ENSG00000126653,ENST00000247026;;;ENST00000247026		Neurodevelopmental disorder with spasticity, seizures, and brain abnormalities	620001	AR	3	Nsrp1
17q21.2	17:42458878-42522579	ATP6V0A1, ATP6N1A, VPP1, DEE104, NEDEBA	ATPase, H+ transporting, V0 subunit A1	192130	ATP6V0A1	535	ENSG00000033627,ENST00000343619;;;ENST00000343619		Developmental and epileptic encephalopathy 104	619970	AD	3	Atp6v0a1
17q21.2	17:42458878-42522579	ATP6V0A1, ATP6N1A, VPP1, DEE104, NEDEBA	ATPase, H+ transporting, V0 subunit A1	192130	ATP6V0A1	535	ENSG00000033627,ENST00000343619;;;ENST00000343619		Neurodevelopmental disorder with epilepsy and brain atrophy	619971	AR	3	Atp6v0a1
17q21.2	17:42562148-42566277	COASY, NBIA6, PCH12	Coenzyme A synthase	609855	COASY	80347	ENSG00000068120,ENST00000393818;;;ENST00000393818		Neurodegeneration with brain iron accumulation 6	615643	AR	3	Coasy
17q21.2	17:42562148-42566277	COASY, NBIA6, PCH12	Coenzyme A synthase	609855	COASY	80347	ENSG00000068120,ENST00000393818;;;ENST00000393818		Pontocerebellar hypoplasia, type 12	618266	AR	3	Coasy
17q21.2	17:42609683-42615238	TUBG1, CDCBM4	Tubulin, gamma 1	191135	TUBG1	7283	ENSG00000131462,ENST00000251413;;;ENST00000251413		Cortical dysplasia, complex, with other brain malformations 4	615412	AD	3	Tubg1
17q21.31	17:44205040-44221304	UBTF, UBF, CONDBA	Upstream binding transcription factor, RNA polymerase I	600673	UBTF	7343	ENSG00000108312,ENST00000436088;;;ENST00000436088		Neurodegeneration, childhood-onset, with brain atrophy	617672	AD	3	Ubtf
17q25.1	17:76081016-76103787	EXOC7, EX070, KIAA1067, NEDSEBA	Exocyst complex component 7	608163	EXOC7	23265	ENSG00000182473,ENST00000589210;;;ENST00000589210		Neurodevelopmental disorder with seizures and brain atrophy	619072	AR	3	Exoc7
17q25.3	17:82031678-82034204	RAC3	Rac family small GTPase 3	602050	RAC3	5881	ENSG00000169750,ENST00000306897;;;ENST00000306897		Neurodevelopmental disorder with structural brain anomalies and dysmorphic facies	618577	AD	3	Rac3
17q25.3	17:82614562-82648444	WDR45B, WIPI3, WDR45L, NEDSBAS	WD repeat domain 45B	609226	WDR45B	56270	ENSG00000141580,ENST00000392325;;;ENST00000392325		Neurodevelopmental disorder with spastic quadriplegia and brain abnormalities with or without seizures	617977	AR	3	Wdr45b
17q25.3	17:82752065-82945914	TBCD, PEBAT	Tubulin-specific chaperone D	604649	TBCD	6904	ENSG00000141556,ENST00000355528;;;ENST00000355528		Encephalopathy, progressive, early-onset, with brain atrophy and thin corpus callosum	617193	AR	3	Tbcd
19p13.3	19:1446230-1473244	APC2, APCL, MRT74	APC regulator of WNT signaling pathway 2	612034	APC2	10297	ENSG00000115266,ENST00000590469;;;ENST00000590469	mutation identified in 1 MRT74 family	Cortical dysplasia, complex, with other brain malformations 10	618677	AR	3	Apc2
19p13.3	19:1446230-1473244	APC2, APCL, MRT74	APC regulator of WNT signaling pathway 2	612034	APC2	10297	ENSG00000115266,ENST00000590469;;;ENST00000590469	mutation identified in 1 MRT74 family	Intellectual developmental disorder, autosomal recessive 74	617169	AR	3	Apc2
19p13.3	19:1905399-1913447	ADAT3, TAD3, NEDBGF	Adenosine deaminase, tRNA-specific, 3	615302	ADAT3	113179	ENSG00000213638,ENST00000329478;;;ENST00000329478		Neurodevelopmental disorder with brain abnormalities, poor growth, and dysmorphic facies	615286	AR	3	Adat3
19p13.13	19:12922479-12933711	FARSA, CML33, RILDBC2	Phenylalanine-tRNA synthetase, alpha subunit	602918	FARSA	2193	ENSG00000179115,ENST00000314606;;;ENST00000314606	mutation identified in 1 RILDBC2	?Rajab interstitial lung disease with brain calcifications 2	619013	AR	3	Farsa
19p13.13	19:13116852-13141147	NACC1, BTBD14B, NECFM	Nucleus accumbens-associated protein 1, BEN and BTB/POZ domains-containing	610672	NACC1	112939	ENSG00000160877,ENST00000292431;;;ENST00000292431		Neurodevelopmental disorder with epilepsy, cataracts, feeding difficulties, and delayed brain myelination	617393	AD	3	Nacc1
19p13.11	19:17555649-17583157	COLGALT1, GLT25D1, BSVD3	Collagen beta(1-0)galactosyltransferase 1	617531	COLGALT1	79709	ENSG00000130309,ENST00000252599;;;ENST00000252599		Brain small vessel disease 3	618360	AR	3	Colgalt1
19q12	19:29698886-29715789	C19orf12, NBIA4, SPG43	Chromosome 19 open reading frame 12	614297	C19orf12	83636	ENSG00000131943,ENST00000323670;;;ENST00000323670	mutation identified in 1 SPG43 family	?Spastic paraplegia 43, autosomal recessive	615043	AR	3	1600014C10Rik
19q12	19:29698886-29715789	C19orf12, NBIA4, SPG43	Chromosome 19 open reading frame 12	614297	C19orf12	83636	ENSG00000131943,ENST00000323670;;;ENST00000323670	mutation identified in 1 SPG43 family	Neurodegeneration with brain iron accumulation 4	614298	AD, AR	3	1600014C10Rik
19q13.2	19:41386374-41397359	EXOSC5, RRP46, CABAC	Exosome component 5	606492	EXOSC5	56915	ENSG00000077348,ENST00000221233;;;ENST00000221233		Cerebellar ataxia, brain abnormalities, and cardiac conduction defects	619576	AR	3	Exosc5
19q13.31	19:43727983-43754962	SMG9, C19orf61, HBMS, NEDITPO	SMG9 nonsense mediated mRNA decay factor	613176	SMG9	56006	ENSG00000105771,ENST00000270066;;;ENST00000270066		Heart and brain malformation syndrome	616920	AR	3	Smg9
19q13.31	19:43727983-43754962	SMG9, C19orf61, HBMS, NEDITPO	SMG9 nonsense mediated mRNA decay factor	613176	SMG9	56006	ENSG00000105771,ENST00000270066;;;ENST00000270066		Neurodevelopmental disorder with intention tremor, pyramidal signs, dyspraxia, and ocular anomalies	619995	AR	3	Smg9
19q13.32	19:45212370-45245407	EXOC3L2, XTP7, BMRS	Exocyst complex component 3-like 2	616927	EXOC3L2	90332	ENSG00000283632,ENST00000413988;;;ENST00000413988		Brain malformation renal syndrome	620943		3	Exoc3l2
19q13.32	19:45933734-45973865	NOVA2, ANOVA, NEDASB	NOVA alternative splicing regulator 2	601991	NOVA2	4858	ENSG00000104967,ENST00000263257;;;ENST00000263257		Neurodevelopmental disorder with or without autistic features and/or structural brain abnormalities	618859	AD	3	Nova2
19q13.32	19:46744760-46758575	FKRP, MDC1C, LGMDR9, MDDGA5, MDDGB5, MDDGC5	Fukutin-related protein	606596	FKRP	79147	ENSG00000181027,ENST00000318584;;;ENST00000318584		Muscular dystrophy-dystroglycanopathy (congenital with brain and eye anomalies), type A, 5	613153	AR	3	Fkrp
19q13.32	19:46744760-46758575	FKRP, MDC1C, LGMDR9, MDDGA5, MDDGB5, MDDGC5	Fukutin-related protein	606596	FKRP	79147	ENSG00000181027,ENST00000318584;;;ENST00000318584		Muscular dystrophy-dystroglycanopathy (congenital with or without impaired intellectual development), type B, 5	606612	AR	3	Fkrp
19q13.32	19:46744760-46758575	FKRP, MDC1C, LGMDR9, MDDGA5, MDDGB5, MDDGC5	Fukutin-related protein	606596	FKRP	79147	ENSG00000181027,ENST00000318584;;;ENST00000318584		Muscular dystrophy-dystroglycanopathy (limb-girdle), type C, 5	607155	AR	3	Fkrp
19q13.33	19:48965309-48966879	FTL, NBIA3, LFTD	Ferritin, light chain	134790	FTL	2512	ENSG00000087086,ENST00000331825;;;ENST00000331825		Hyperferritinemia-cataract syndrome	600886	AD	3	Ftl1,Ftl1-ps2,Ftl2-ps
19q13.33	19:48965309-48966879	FTL, NBIA3, LFTD	Ferritin, light chain	134790	FTL	2512	ENSG00000087086,ENST00000331825;;;ENST00000331825		L-ferritin deficiency, dominant and recessive	615604	AD, AR	3	Ftl1,Ftl1-ps2,Ftl2-ps
19q13.33	19:48965309-48966879	FTL, NBIA3, LFTD	Ferritin, light chain	134790	FTL	2512	ENSG00000087086,ENST00000331825;;;ENST00000331825		Neurodegeneration with brain iron accumulation 3	606159	AD	3	Ftl1,Ftl1-ps2,Ftl2-ps
19q13.42	19:55655035-55674716	U2AF2, U2AF65, DEVDFB	U2 small nuclear RNA auxiliary factor 2	191318	U2AF2	11338	ENSG00000063244,ENST00000308924;;;ENST00000308924		Developmental delay, dysmorphic facies, and brain anomalies	620535	AD	3	U2af2
20p13	20:3888781-3929887	PANK2, NBIA1, PKAN	Pantothenate kinase 2	606157	PANK2	80025	ENSG00000125779,ENST00000610179;;;ENST00000610179		Neurodegeneration with brain iron accumulation 1	234200	AR	3	Pank2
20p11.21	20:25248085-25298012	PYGB	Phosphorylase, glycogen, brain	138550	PYGB	5834	ENSG00000100994,ENST00000216962;;;ENST00000216962					Pygb
20q11.22	20:34560542-34677092	PIGU, CDC91L1, GPIBD21, NEDBSS	Phosphatidylinositol glycan anchor biosynthesis class U protein	608528	PIGU	128869	ENSG00000101464,ENST00000217446;;;ENST00000217446		Neurodevelopmental disorder with brain anomalies, seizures, and scoliosis	618590	AR	3	Pigu
20q13.2	20:53943541-54070594	BCAS1, NABC1	Brain-enriched myelin-associated protein 1	602968	BCAS1	8537	ENSG00000064787,ENST00000688948;;;ENST00000688948					Bcas1
21q22.3	21:42843094-42892998	WDR4, MIGSB, GAMOS6	WD repeat-containing protein 4	605924	WDR4	10785	ENSG00000160193,ENST00000398208;;;ENST00000398208		Galloway-Mowat syndrome 6	618347	AR	3	Wdr4
21q22.3	21:42843094-42892998	WDR4, MIGSB, GAMOS6	WD repeat-containing protein 4	605924	WDR4	10785	ENSG00000160193,ENST00000398208;;;ENST00000398208		Microcephaly, growth deficiency, seizures, and brain malformations	618346	AR	3	Wdr4
22q12.3	22:33066663-33922824	LARGE, KIAA0609, MDC1D, MDDGA6, MDDGB6	Acetylglucosaminyltransferase-like protein	603590	LARGE1	9215	ENSG00000133424,ENST00000397394;;;ENST00000397394		Muscular dystrophy-dystroglycanopathy (congenital with brain and eye anomalies), type A, 6	613154	AR	3	Large1
22q12.3	22:33066663-33922824	LARGE, KIAA0609, MDC1D, MDDGA6, MDDGB6	Acetylglucosaminyltransferase-like protein	603590	LARGE1	9215	ENSG00000133424,ENST00000397394;;;ENST00000397394		Muscular dystrophy-dystroglycanopathy (congenital with impaired intellectual development), type B, 6	608840	AR	3	Large1
22q13.1	22:38111495-38181830	PLA2G6, IPLA2, INAD1, NBIA2B, NBIA2A, PARK14	Phospholipase A2, group VI	603604	PLA2G6	8398	ENSG00000184381,ENST00000332509;;;ENST00000332509		Infantile neuroaxonal dystrophy 1	256600	AR	3	Pla2g6
22q13.1	22:38111495-38181830	PLA2G6, IPLA2, INAD1, NBIA2B, NBIA2A, PARK14	Phospholipase A2, group VI	603604	PLA2G6	8398	ENSG00000184381,ENST00000332509;;;ENST00000332509		Neurodegeneration with brain iron accumulation 2B	610217	AR	3	Pla2g6
22q13.1	22:38111495-38181830	PLA2G6, IPLA2, INAD1, NBIA2B, NBIA2A, PARK14	Phospholipase A2, group VI	603604	PLA2G6	8398	ENSG00000184381,ENST00000332509;;;ENST00000332509		Parkinson disease 14, autosomal recessive	612953	AR	3	Pla2g6
Xp11.23	X:49074442-49101178	WDR45, WIPI4, NBIA5	WD repeat-containing protein 45	300526	WDR45	11152	ENSG00000196998,ENST00000376372;;;ENST00000376372	?pseudogene on 4q31.3	Neurodegeneration with brain iron accumulation 5	300894	XLD	3	Wdr45
Xp11.22	X:53374149-53422728	SMC1A, SMC1L1, SMC1, DXS423E, KIAA0178, CDLS2, DEE85	Segregation of mitotic chromosomes 1 (SMC1, yeast, homolog of; DXS423E; SB1.8)	300040	SMC1A	8243	ENSG00000072501,ENST00000322213;;;ENST00000322213	escapes lyonization	Cornelia de Lange syndrome 2	300590	XLD	3	Smc1a
Xp11.22	X:53374149-53422728	SMC1A, SMC1L1, SMC1, DXS423E, KIAA0178, CDLS2, DEE85	Segregation of mitotic chromosomes 1 (SMC1, yeast, homolog of; DXS423E; SB1.8)	300040	SMC1A	8243	ENSG00000072501,ENST00000322213;;;ENST00000322213	escapes lyonization	Developmental and epileptic encephalopathy 85, with or without midline brain defects	301044	XLD	3	Smc1a
Xq22.1	X:103062651-103064171	BEX1	Brain-expressed X-linked gene 1	300690	BEX1	55859	ENSG00000133169,ENST00000372728;;;ENST00000372728					Bex1,Bex2
Xq22.2	X:103309346-103310990	BEX2	Brain-expressed X-linked gene 2	300691	BEX2	84707	ENSG00000133134,ENST00000372677;;;ENST00000372677					Bex1

## Sheet: TTD
HDAC1
PPP3CA
GCPII
OPRS1
PDGFRB
CACNA1B
APP
GLP1R
NMDAR2B
TACR1
BDKRB2
DAT
NOS3
NOS3
MME
NMDAR
ECE
