# Supplementary material for: Study on the Mechanism of DNHP's Effects on Brain Damage Based on Network Toxicology
Source: Research Square preprint supplement (doi:10.21203/rs.3.rs-7966294/v1), 2025-12-01
Supplement: Supplementary file 3 [file 2149eec02adc44f822596401.xlsx]

## Sheet: Sheet1
category	subcategory	ID	Description	GeneRatio	BgRatio	RichFactor	FoldEnrichment	zScore	pvalue	p.adjust	qvalue	geneID	Count
Human Diseases	Substance dependence	hsa05033	Nicotine addiction	12/121	41/9434	0.292683	22.8196	15.9591	6.57076e-14	1.70183e-11	6.70909e-12	GRIN2B/GRIN1/GRIN3A/CACNA1B/GRIN2D/GRIN2A/GABRB3/GABRA3/GABRG2/GABRA1/GABRA5/GABRA2	12
Metabolism	Amino acid metabolism	hsa00310	Lysine degradation	13/121	63/9434	0.206349	16.0884	13.696	8.05146e-13	1.04266e-10	4.11048e-11	KMT2D/NSD2/PRDM16/EZH2/EHMT1/KMT2E/SETD2/KMT2A/SETD1A/NSD1/ASH1L/SETD1B/KMT2C	13
Environmental Information Processing	Signal transduction	hsa04015	Rap1 signaling pathway	20/121	212/9434	0.0943396	7.35537	10.6677	2.11266e-12	1.82393e-10	7.19044e-11	NRAS/GRIN2B/GRIN1/KRAS/HRAS/FGFR1/ACTB/VEGFA/GRIN2A/FGF23/F2R/FLT1/PDGFRB/KIT/EGFR/PRKCA/ADORA2A/MAPK14/MAP2K1/RAF1	20
Environmental Information Processing	Signal transduction	hsa04020	Calcium signaling pathway	21/121	254/9434	0.0826772	6.44609	10.0289	7.28329e-12	4.71593e-10	1.85915e-10	GRIN2B/GRIN1/NOS1/GRIN3A/CACNA1B/FGFR1/GRIN2D/VEGFA/GRIN2A/FGF23/F2R/FLT1/PDGFRB/GRM5/EGFR/PRKCA/ADORA2A/OXTR/HTR2C/HTR2A/P2RX7	21
Human Diseases	Endocrine and metabolic disease	hsa04933	AGE-RAGE signaling pathway in diabetic complications	14/121	101/9434	0.138614	10.8073	11.2946	3.05127e-11	1.58056e-09	6.23101e-10	NRAS/KRAS/MAPK8/HRAS/TNF/MAPK10/VEGFA/PRKCD/CASP3/PRKCA/MAPK14/JAK2/CCND1/CDK4	14
NA	NA	hsa04082	Neuroactive ligand signaling	18/121	199/9434	0.0904523	7.05229	9.83559	6.02205e-11	2.59952e-09	1.02481e-09	GRIN2B/GRIN1/GRIN3A/GRIN2D/GRIN2A/GABRB3/GABRA3/GABRG2/GABRA1/GABRA5/GABRA2/GRM5/SLC6A9/PRKCA/ADORA1/ADORA2A/HTR2C/HTR2A	18
Organismal Systems	Endocrine system	hsa04917	Prolactin signaling pathway	12/121	71/9434	0.169014	13.1775	11.7396	7.71418e-11	2.85425e-09	1.12523e-09	NRAS/KRAS/MAPK8/HRAS/MAPK10/MAPK14/JAK2/MAP2K1/CCND1/CCND2/RAF1/GCK	12
Environmental Information Processing	Signal transduction	hsa04014	Ras signaling pathway	19/121	238/9434	0.0798319	6.22425	9.30435	1.48404e-10	4.80458e-09	1.8941e-09	NRAS/GRIN2B/GRIN1/KRAS/MAPK8/HRAS/FGFR1/MAPK10/VEGFA/GRIN2A/FGF23/FLT1/PDGFRB/KIT/EGFR/PRKCA/MAP2K1/RAF1/ABL1	19
Organismal Systems	Nervous system	hsa04720	Long-term potentiation	11/121	67/9434	0.164179	12.8005	11.0487	6.84338e-10	1.96937e-08	7.76383e-09	NRAS/GRIN2B/GRIN1/KRAS/HRAS/GRIN2D/GRIN2A/GRM5/PRKCA/MAP2K1/RAF1	11
Human Diseases	Cancer: overview	hsa05205	Proteoglycans in cancer	17/121	204/9434	0.0833333	6.49725	9.04757	7.76308e-10	2.01064e-08	7.92652e-09	NRAS/SHH/KRAS/HRAS/FGFR1/TNF/ACTB/VEGFA/SMO/HIF1A/EGFR/CASP3/PRKCA/MAPK14/MAP2K1/CCND1/RAF1	17
Human Diseases	Cancer: overview	hsa05230	Central carbon metabolism in cancer	11/121	71/9434	0.15493	12.0794	10.681	1.30608e-09	2.90223e-08	1.14414e-08	NRAS/KRAS/HRAS/FGFR1/PDGFRB/KIT/HIF1A/EGFR/MAP2K1/RAF1/GCK	11
Environmental Information Processing	Signaling molecules and interaction	hsa04080	Neuroactive ligand-receptor interaction	22/121	370/9434	0.0594595	4.63587	8.13247	1.34466e-09	2.90223e-08	1.14414e-08	GRIN2B/GRIN1/GRIN3A/GRIN2D/ADM/GRIN2A/F2R/GABRB3/GABRA3/GABRG2/GABRA1/GABRA5/GABRA2/GRM5/ADORA1/ADORA2A/OXTR/HTR2C/HTR2A/TSPO/P2RX7/CRHR1	22
Human Diseases	Substance dependence	hsa05032	Morphine addiction	12/121	91/9434	0.131868	10.2814	10.1406	1.53299e-09	3.05419e-08	1.20405e-08	CACNA1B/PDE10A/GABRB3/GABRA3/GABRG2/GABRA1/GABRA5/GABRA2/PRKCA/ADORA1/PDE4A/PDE4B	12
Human Diseases	Cancer: specific types	hsa05219	Bladder cancer	9/121	41/9434	0.219512	17.1147	11.7865	1.72668e-09	3.0673e-08	1.20922e-08	NRAS/KRAS/HRAS/VEGFA/EGFR/MAP2K1/CCND1/CDK4/RAF1	9
Human Diseases	Cancer: specific types	hsa05218	Melanoma	11/121	73/9434	0.150685	11.7484	10.508	1.77643e-09	3.0673e-08	1.20922e-08	NRAS/KRAS/HRAS/FGFR1/FGF23/PDGFRB/EGFR/MAP2K1/CCND1/CDK4/RAF1	11
Environmental Information Processing	Signal transduction	hsa04024	cAMP signaling pathway	17/121	226/9434	0.0752212	5.86477	8.43736	3.75341e-09	6.07583e-08	2.39527e-08	GRIN2B/GRIN1/GRIN3A/MAPK8/GRIN2D/MAPK10/GRIN2A/F2R/PDE10A/ADORA1/ADORA2A/MAP2K1/OXTR/PDE4A/PDE4B/RAF1/CRHR1	17
Environmental Information Processing	Signal transduction	hsa04071	Sphingolipid signaling pathway	13/121	122/9434	0.106557	8.30795	9.26034	4.48361e-09	6.83091e-08	2.69294e-08	NRAS/CERS1/KRAS/ASAH1/MAPK8/HRAS/TNF/MAPK10/PRKCA/ADORA1/MAPK14/MAP2K1/RAF1	13
Environmental Information Processing	Signal transduction	hsa04010	MAPK signaling pathway	19/121	300/9434	0.0633333	4.93791	7.90075	7.34236e-09	1.05648e-07	4.16496e-08	NRAS/KRAS/CACNA1B/MAPK8/HRAS/FGFR1/TNF/MAPK10/VEGFA/FGF23/FLT1/PDGFRB/KIT/EGFR/CASP3/PRKCA/MAPK14/MAP2K1/RAF1	19
Human Diseases	Cancer: specific types	hsa05215	Prostate cancer	12/121	106/9434	0.113208	8.82645	9.23626	9.09905e-09	1.24034e-07	4.88979e-08	NRAS/KRAS/FOLH1/HRAS/FGFR1/PDGFRB/GRM5/AR/EGFR/MAP2K1/CCND1/RAF1	12
Organismal Systems	Immune system	hsa04664	Fc epsilon RI signaling pathway	10/121	69/9434	0.144928	11.2996	9.78728	1.48832e-08	1.92737e-07	7.59827e-08	NRAS/KRAS/MAPK8/HRAS/TNF/MAPK10/PRKCA/MAPK14/MAP2K1/RAF1	10
Cellular Processes	Cell growth and death	hsa04210	Apoptosis	13/121	137/9434	0.0948905	7.39832	8.5986	1.85696e-08	2.29025e-07	9.02884e-08	NRAS/KRAS/MAPK8/HRAS/TNF/ACTB/MAPK10/PARP1/CTSK/CASP3/MAP2K1/RAF1/CTSB	13
Cellular Processes	Cellular community - eukaryotes	hsa04540	Gap junction	11/121	92/9434	0.119565	9.32213	9.14285	2.18672e-08	2.57437e-07	1.01489e-07	NRAS/KRAS/HRAS/PDGFRB/GRM5/EGFR/PRKCA/MAP2K1/HTR2C/HTR2A/RAF1	11
Organismal Systems	Nervous system	hsa04726	Serotonergic synapse	12/121	115/9434	0.104348	8.13568	8.77551	2.31406e-08	2.60583e-07	1.02729e-07	NRAS/KRAS/CACNA1B/HRAS/APP/GABRB3/CASP3/PRKCA/MAP2K1/HTR2C/HTR2A/RAF1	12
Organismal Systems	Endocrine system	hsa04912	GnRH signaling pathway	11/121	93/9434	0.11828	9.2219	9.08217	2.45349e-08	2.64772e-07	1.04381e-07	NRAS/KRAS/MAPK8/HRAS/MAPK10/PRKCD/EGFR/PRKCA/MAPK14/MAP2K1/RAF1	11
Human Diseases	Cancer: specific types	hsa05214	Glioma	10/121	76/9434	0.131579	10.2588	9.23726	3.87466e-08	4.01414e-07	1.58249e-07	NRAS/KRAS/HRAS/PDGFRB/EGFR/PRKCA/MAP2K1/CCND1/CDK4/RAF1	10
Human Diseases	Drug resistance: antineoplastic	hsa01522	Endocrine resistance	11/121	99/9434	0.111111	8.66299	8.73638	4.75543e-08	4.56169e-07	1.79835e-07	NRAS/KRAS/MAPK8/HRAS/MAPK10/EGFR/MAPK14/MAP2K1/CCND1/CDK4/RAF1	11
Human Diseases	Cancer: overview	hsa05231	Choline metabolism in cancer	11/121	99/9434	0.111111	8.66299	8.73638	4.75543e-08	4.56169e-07	1.79835e-07	NRAS/KRAS/MAPK8/HRAS/MAPK10/PDGFRB/HIF1A/EGFR/PRKCA/MAP2K1/RAF1	11
Human Diseases	Drug resistance: antineoplastic	hsa01521	EGFR tyrosine kinase inhibitor resistance	10/121	80/9434	0.125	9.74587	8.9541	6.40179e-08	5.92166e-07	2.33449e-07	NRAS/KRAS/HRAS/VEGFA/PDGFRB/EGFR/PRKCA/JAK2/MAP2K1/RAF1	10
Organismal Systems	Endocrine system	hsa04926	Relaxin signaling pathway	12/121	130/9434	0.0923077	7.19695	8.10938	9.20167e-08	8.21804e-07	3.23979e-07	NRAS/NOS1/KRAS/MAPK8/HRAS/MAPK10/VEGFA/EGFR/PRKCA/MAPK14/MAP2K1/RAF1	12
Environmental Information Processing	Signal transduction	hsa04012	ErbB signaling pathway	10/121	86/9434	0.116279	9.06592	8.56479	1.29063e-07	1.11424e-06	4.39267e-07	NRAS/KRAS/MAPK8/HRAS/MAPK10/EGFR/PRKCA/MAP2K1/RAF1/ABL1	10
Human Diseases	Cancer: specific types	hsa05210	Colorectal cancer	10/121	87/9434	0.114943	8.96172	8.5036	1.44263e-07	1.20529e-06	4.75161e-07	NRAS/KRAS/MAPK8/HRAS/MAPK10/EGFR/CASP3/MAP2K1/CCND1/RAF1	10
Environmental Information Processing	Signal transduction	hsa04151	PI3K-Akt signaling pathway	19/121	362/9434	0.0524862	4.09219	6.83819	1.49722e-07	1.21182e-06	4.77732e-07	NRAS/KRAS/HRAS/FGFR1/YWHAG/VEGFA/FGF23/F2R/FLT1/PDGFRB/KIT/EGFR/PRKCA/JAK2/MAP2K1/CCND1/CDK4/CCND2/RAF1	19
Human Diseases	Neurodegenerative disease	hsa05022	Pathways of neurodegeneration - multiple diseases	22/121	483/9434	0.0455487	3.55129	6.561	1.6915e-07	1.32757e-06	5.23367e-07	NRAS/GRIN2B/GRIN1/NOS1/KRAS/HTT/CACNA1B/MAPK8/HRAS/GRIN2D/TNF/MAPK10/APP/GRIN2A/GRM5/CASP3/PRKCA/VCP/MAPK14/MAP2K1/RAF1/LRRK2	22
Human Diseases	Infectious disease: viral	hsa05167	Kaposi sarcoma-associated herpesvirus infection	14/121	196/9434	0.0714286	5.56907	7.36783	1.89073e-07	1.44029e-06	5.67803e-07	NRAS/KRAS/MAPK8/HRAS/MAPK10/VEGFA/HIF1A/CASP3/MAPK14/JAK2/MAP2K1/CCND1/CDK4/RAF1	14
Human Diseases	Cancer: specific types	hsa05223	Non-small cell lung cancer	9/121	73/9434	0.123288	9.61236	8.41968	3.39276e-07	2.51065e-06	9.89769e-07	NRAS/KRAS/HRAS/EGFR/PRKCA/MAP2K1/CCND1/CDK4/RAF1	9
Organismal Systems	Nervous system	hsa04723	Retrograde endocannabinoid signaling	12/121	149/9434	0.0805369	6.27922	7.40363	4.12719e-07	2.96929e-06	1.17058e-06	CACNA1B/MAPK8/MAPK10/GABRB3/GABRA3/GABRG2/GABRA1/GABRA5/GABRA2/GRM5/PRKCA/MAPK14	12
Human Diseases	Cancer: specific types	hsa05212	Pancreatic cancer	9/121	77/9434	0.116883	9.11302	8.14765	5.40077e-07	3.78054e-06	1.4904e-06	KRAS/MAPK8/MAPK10/VEGFA/EGFR/MAP2K1/CCND1/CDK4/RAF1	9
Environmental Information Processing	Signal transduction	hsa04370	VEGF signaling pathway	8/121	60/9434	0.133333	10.3956	8.32166	8.50555e-07	5.5491e-06	2.18762e-06	NRAS/KRAS/HRAS/VEGFA/PRKCA/MAPK14/MAP2K1/RAF1	8
Organismal Systems	Nervous system	hsa04730	Long-term depression	8/121	60/9434	0.133333	10.3956	8.32166	8.50555e-07	5.5491e-06	2.18762e-06	NRAS/NOS1/KRAS/HRAS/PRKCA/MAP2K1/RAF1/CRHR1	8
Organismal Systems	Immune system	hsa04625	C-type lectin receptor signaling pathway	10/121	105/9434	0.0952381	7.42542	7.54661	8.57004e-07	5.5491e-06	2.18762e-06	NRAS/KRAS/MAPK8/HRAS/TNF/MAPK10/PRKCD/MAPK14/CASP1/RAF1	10
Environmental Information Processing	Signal transduction	hsa04068	FoxO signaling pathway	11/121	133/9434	0.0827068	6.44839	7.21277	9.86806e-07	6.23373e-06	2.45751e-06	NRAS/KRAS/MAPK8/HRAS/MAPK10/EGFR/MAPK14/MAP2K1/CCND1/CCND2/RAF1	11
Human Diseases	Infectious disease: viral	hsa05161	Hepatitis B	12/121	163/9434	0.0736196	5.7399	6.95781	1.08525e-06	6.6924e-06	2.63834e-06	NRAS/KRAS/MAPK8/HRAS/TNF/MAPK10/CASP3/PRKCA/MAPK14/JAK2/MAP2K1/RAF1	12
Cellular Processes	Cellular community - eukaryotes	hsa04510	Focal adhesion	13/121	203/9434	0.0640394	4.99296	6.55528	1.84119e-06	1.10118e-05	4.34119e-06	MAPK8/HRAS/ACTB/MAPK10/VEGFA/FLT1/PDGFRB/EGFR/PRKCA/MAP2K1/CCND1/CCND2/RAF1	13
Organismal Systems	Nervous system	hsa04727	GABAergic synapse	9/121	89/9434	0.101124	7.8843	7.43769	1.87074e-06	1.10118e-05	4.34119e-06	ABAT/CACNA1B/GABRB3/GABRA3/GABRG2/GABRA1/GABRA5/GABRA2/PRKCA	9
Human Diseases	Cancer: overview	hsa05235	PD-L1 expression and PD-1 checkpoint pathway in cancer	9/121	90/9434	0.1	7.79669	7.38457	2.05641e-06	1.18358e-05	4.666e-06	NRAS/KRAS/HRAS/HIF1A/EGFR/MAPK14/JAK2/MAP2K1/RAF1	9
Human Diseases	Cancer: specific types	hsa05224	Breast cancer	11/121	148/9434	0.0743243	5.79484	6.70137	2.84253e-06	1.60047e-05	6.3095e-06	NRAS/KRAS/HRAS/FGFR1/FGF23/KIT/EGFR/MAP2K1/CCND1/CDK4/RAF1	11
Organismal Systems	Nervous system	hsa04722	Neurotrophin signaling pathway	10/121	120/9434	0.0833333	6.49725	6.90781	2.93399e-06	1.61681e-05	6.37394e-06	NRAS/KRAS/MAPK8/HRAS/MAPK10/PRKCD/MAPK14/MAP2K1/RAF1/ABL1	10
Environmental Information Processing	Signal transduction	hsa04072	Phospholipase D signaling pathway	11/121	149/9434	0.0738255	5.75595	6.66979	3.03621e-06	1.63829e-05	6.4586e-06	NRAS/KRAS/HRAS/F2R/PDGFRB/KIT/GRM5/EGFR/PRKCA/MAP2K1/RAF1	11
Organismal Systems	Immune system	hsa04660	T cell receptor signaling pathway	10/121	122/9434	0.0819672	6.39073	6.83092	3.40969e-06	1.76622e-05	6.96294e-06	NRAS/KRAS/MAPK8/HRAS/TNF/MAPK10/MAPK14/MAP2K1/CDK4/RAF1	10
Organismal Systems	Endocrine system	hsa04935	Growth hormone synthesis, secretion and action	10/121	122/9434	0.0819672	6.39073	6.83092	3.40969e-06	1.76622e-05	6.96294e-06	NRAS/KRAS/MAPK8/HRAS/MAPK10/PRKCA/MAPK14/JAK2/MAP2K1/RAF1	10
Human Diseases	Infectious disease: viral	hsa05160	Hepatitis C	11/121	159/9434	0.0691824	5.39394	6.36896	5.70707e-06	2.89829e-05	1.14259e-05	NRAS/KRAS/HRAS/YWHAG/TNF/EGFR/CASP3/MAP2K1/CCND1/CDK4/RAF1	11
Human Diseases	Cancer: specific types	hsa05220	Chronic myeloid leukemia	8/121	77/9434	0.103896	8.10046	7.13077	5.83335e-06	2.90546e-05	1.14542e-05	NRAS/KRAS/HRAS/MAP2K1/CCND1/CDK4/RAF1/ABL1	8
Human Diseases	Infectious disease: viral	hsa05163	Human cytomegalovirus infection	13/121	226/9434	0.0575221	4.48482	6.04401	6.04076e-06	2.952e-05	1.16376e-05	NRAS/KRAS/HRAS/TNF/VEGFA/EGFR/CASP3/PRKCA/MAPK14/MAP2K1/CCND1/CDK4/RAF1	13
Human Diseases	Cancer: overview	hsa05208	Chemical carcinogenesis - reactive oxygen species	13/121	227/9434	0.0572687	4.46507	6.02335	6.33903e-06	3.04038e-05	1.19861e-05	NRAS/KRAS/MAPK8/HRAS/MAPK10/VEGFA/PRKCD/HIF1A/EGFR/MAPK14/MAP2K1/RAF1/ABL1	13
Human Diseases	Cancer: specific types	hsa05213	Endometrial cancer	7/121	59/9434	0.118644	9.25032	7.24576	9.41996e-06	4.43595e-05	1.74878e-05	NRAS/KRAS/HRAS/EGFR/MAP2K1/CCND1/RAF1	7
Human Diseases	Cancer: specific types	hsa05225	Hepatocellular carcinoma	11/121	170/9434	0.0647059	5.04492	6.06608	1.08306e-05	5.00917e-05	1.97476e-05	NRAS/KRAS/HRAS/ACTB/EGFR/PRKCA/MAP2K1/CCND1/CDK4/RAF1/TERT	11
Human Diseases	Cancer: overview	hsa05207	Chemical carcinogenesis - receptor activation	12/121	217/9434	0.0552995	4.31154	5.62519	2.08733e-05	9.48456e-05	3.73909e-05	NRAS/KRAS/CACNA1B/HRAS/VEGFA/AR/EGFR/PRKCA/JAK2/MAP2K1/CCND1/RAF1	12
Human Diseases	Cancer: specific types	hsa05226	Gastric cancer	10/121	150/9434	0.0666667	5.1978	5.90707	2.14082e-05	9.55988e-05	3.76878e-05	NRAS/SHH/KRAS/HRAS/FGF23/EGFR/MAP2K1/CCND1/RAF1/TERT	10
Human Diseases	Cancer: specific types	hsa05221	Acute myeloid leukemia	7/121	68/9434	0.102941	8.02601	6.62764	2.43361e-05	0.000106831	4.2116e-05	NRAS/KRAS/HRAS/KIT/MAP2K1/CCND1/RAF1	7
Organismal Systems	Endocrine system	hsa04919	Thyroid hormone signaling pathway	9/121	122/9434	0.0737705	5.75166	6.02111	2.51944e-05	0.000108756	4.28746e-05	NRAS/KRAS/HRAS/ACTB/HIF1A/PRKCA/MAP2K1/CCND1/RAF1	9
Human Diseases	Endocrine and metabolic disease	hsa04930	Type II diabetes mellitus	6/121	47/9434	0.12766	9.95323	7.01355	2.74676e-05	0.000116625	4.59769e-05	CACNA1B/MAPK8/TNF/MAPK10/PRKCD/GCK	6
Organismal Systems	Endocrine system	hsa04921	Oxytocin signaling pathway	10/121	155/9434	0.0645161	5.03013	5.76642	2.84456e-05	0.000117625	4.63712e-05	NRAS/KRAS/HRAS/ACTB/EGFR/PRKCA/MAP2K1/OXTR/CCND1/RAF1	10
Human Diseases	Infectious disease: viral	hsa05166	Human T-cell leukemia virus 1 infection	12/121	224/9434	0.0535714	4.1768	5.48475	2.86115e-05	0.000117625	4.63712e-05	NRAS/KRAS/MAPK8/HRAS/TNF/MAPK10/MAP2K1/TSPO/CCND1/CDK4/CCND2/TERT	12
Human Diseases	Cancer: specific types	hsa05211	Renal cell carcinoma	7/121	70/9434	0.1	7.79669	6.50562	2.94629e-05	0.000119233	4.7005e-05	NRAS/KRAS/HRAS/VEGFA/HIF1A/MAP2K1/RAF1	7
Human Diseases	Substance dependence	hsa05034	Alcoholism	11/121	191/9434	0.0575916	4.49024	5.55442	3.22758e-05	0.000128607	5.07005e-05	NRAS/GRIN2B/GRIN1/KRAS/GRIN3A/HRAS/GRIN2D/GRIN2A/ADORA2A/MAP2K1/RAF1	11
Human Diseases	Neurodegenerative disease	hsa05010	Alzheimer disease	16/121	391/9434	0.0409207	3.19046	5.04244	3.69262e-05	0.000144907	5.71266e-05	NRAS/GRIN2B/GRIN1/NOS1/KRAS/MAPK8/HRAS/GRIN2D/TNF/MAPK10/APP/GRIN2A/GRM5/CASP3/MAP2K1/RAF1	16
Cellular Processes	Transport and catabolism	hsa04142	Lysosome	9/121	133/9434	0.0676692	5.27596	5.66066	4.99598e-05	0.000193128	7.61366e-05	ASAH1/NEU1/NAGLU/GBA1/NAGA/HEXA/HEXB/CTSK/CTSB	9
Human Diseases	Neurodegenerative disease	hsa05020	Prion disease	13/121	278/9434	0.0467626	3.64594	5.10413	5.44153e-05	0.000207258	8.17072e-05	GRIN2B/GRIN1/GRIN3A/CACNA1B/MAPK8/GRIN2D/NCAM1/TNF/MAPK10/GRIN2A/PRKCD/CASP3/MAPK14	13
Human Diseases	Cancer: overview	hsa05206	MicroRNAs in cancer	14/121	319/9434	0.0438871	3.42175	5.01555	5.54232e-05	0.000208038	8.20145e-05	NRAS/EZH2/KRAS/HRAS/VEGFA/PDGFRB/EGFR/CASP3/PRKCA/MAP2K1/CCND1/CCND2/RAF1/ABL1	14
Cellular Processes	Transport and catabolism	hsa04140	Autophagy - animal	10/121	169/9434	0.0591716	4.61343	5.40273	5.95735e-05	0.000220422	8.68967e-05	NRAS/KRAS/MAPK8/HRAS/MAPK10/PRKCD/HIF1A/MAP2K1/RAF1/CTSB	10
Metabolism	Lipid metabolism	hsa00600	Sphingolipid metabolism	6/121	55/9434	0.109091	8.50548	6.36289	6.82134e-05	0.000246637	9.72313e-05	CERS1/ASAH1/NEU1/GBA1/HEXA/HEXB	6
Metabolism	Glycan biosynthesis and metabolism	hsa00511	Other glycan degradation	4/121	18/9434	0.222222	17.326	7.90233	6.85631e-05	0.000246637	9.72313e-05	NEU1/GBA1/HEXA/HEXB	4
Human Diseases	Infectious disease: viral	hsa05170	Human immunodeficiency virus 1 infection	11/121	213/9434	0.0516432	4.02646	5.09224	8.71208e-05	0.000308088	0.000121457	NRAS/KRAS/MAPK8/HRAS/TNF/MAPK10/CASP3/PRKCA/MAPK14/MAP2K1/RAF1	11
Human Diseases	Infectious disease: viral	hsa05165	Human papillomavirus infection	14/121	333/9434	0.042042	3.27789	4.82373	8.80251e-05	0.000308088	0.000121457	NRAS/KRAS/HRAS/TNF/VEGFA/PDGFRB/EGFR/CASP3/MAP2K1/CCND1/CDK4/CCND2/RAF1/TERT	14
Human Diseases	Neurodegenerative disease	hsa05017	Spinocerebellar ataxia	9/121	144/9434	0.0625	4.87293	5.33809	9.27691e-05	0.000320362	0.000126296	GRIN2B/GRIN1/GRIN3A/MAPK8/GRIN2D/MAPK10/GRIN2A/PRKCA/RORA	9
Human Diseases	Cardiovascular disease	hsa05417	Lipid and atherosclerosis	11/121	216/9434	0.0509259	3.97054	5.03404	9.8744e-05	0.000336509	0.000132662	NRAS/KRAS/MAPK8/HRAS/TNF/MAPK10/CASP3/PRKCA/MAPK14/JAK2/CASP1	11
Human Diseases	Cancer: specific types	hsa05216	Thyroid cancer	5/121	37/9434	0.135135	10.5361	6.62443	0.000100279	0.000337301	0.000132974	NRAS/KRAS/HRAS/MAP2K1/CCND1	5
Organismal Systems	Endocrine system	hsa04928	Parathyroid hormone synthesis, secretion and action	8/121	115/9434	0.0695652	5.42379	5.44041	0.000109343	0.000363074	0.000143134	FGFR1/FGF23/EGFR/PRKCA/MAP2K1/PDE4A/PDE4B/RAF1	8
Metabolism	Carbohydrate metabolism	hsa00520	Amino sugar and nucleotide sugar metabolism	5/121	38/9434	0.131579	10.2588	6.51851	0.000114297	0.00037472	0.000147725	HEXA/HEXB/GNE/MPI/GCK	5
Organismal Systems	Endocrine system	hsa04929	GnRH secretion	6/121	65/9434	0.0923077	7.19695	5.71427	0.000175107	0.000566908	0.000223492	NRAS/KRAS/HRAS/PRKCA/MAP2K1/RAF1	6
Cellular Processes	Cell growth and death	hsa04218	Cellular senescence	9/121	157/9434	0.0573248	4.46944	4.99665	0.000179527	0.000574044	0.000226305	NRAS/KRAS/HRAS/MAPK14/MAP2K1/CCND1/CDK4/CCND2/RAF1	9
Cellular Processes	Cell motility	hsa04810	Regulation of actin cytoskeleton	11/121	232/9434	0.0474138	3.69671	4.74034	0.000185741	0.000586669	0.000231282	NRAS/KRAS/HRAS/FGFR1/ACTB/FGF23/F2R/PDGFRB/EGFR/MAP2K1/RAF1	11
Metabolism	Glycan biosynthesis and metabolism	hsa00513	Various types of N-glycan biosynthesis	5/121	43/9434	0.116279	9.06592	6.04234	0.000208267	0.000649893	0.000256206	MGAT2/ST3GAL3/B4GALT1/HEXA/HEXB	5
Human Diseases	Substance dependence	hsa05031	Amphetamine addiction	6/121	69/9434	0.0869565	6.77973	5.49226	0.000243763	0.000751603	0.000296303	GRIN2B/GRIN1/GRIN3A/GRIN2D/GRIN2A/PRKCA	6
Organismal Systems	Sensory system	hsa04750	Inflammatory mediator regulation of TRP channels	7/121	99/9434	0.0707071	5.51281	5.14494	0.000269349	0.000820721	0.000323552	MAPK8/MAPK10/PRKCD/PRKCA/MAPK14/HTR2C/HTR2A	7
Organismal Systems	Endocrine system	hsa04916	Melanogenesis	7/121	101/9434	0.0693069	5.40365	5.07149	0.000304696	0.000917631	0.000361757	NRAS/KRAS/HRAS/KIT/PRKCA/MAP2K1/RAF1	7
Organismal Systems	Immune system	hsa04650	Natural killer cell mediated cytotoxicity	8/121	134/9434	0.0597015	4.65474	4.85669	0.000314674	0.000936787	0.000369309	NRAS/KRAS/HRAS/TNF/CASP3/PRKCA/MAP2K1/RAF1	8
Human Diseases	Infectious disease: viral	hsa05164	Influenza A	9/121	173/9434	0.0520231	4.05608	4.62415	0.000370375	0.00109008	0.000429741	TNF/ACTB/CASP3/PRKCA/JAK2/MAP2K1/CASP1/CDK4/RAF1	9
Organismal Systems	Endocrine system	hsa04910	Insulin signaling pathway	8/121	138/9434	0.057971	4.51982	4.74772	0.000383987	0.00110445	0.000435406	NRAS/KRAS/MAPK8/HRAS/MAPK10/MAP2K1/RAF1/GCK	8
Cellular Processes	Transport and catabolism	hsa04137	Mitophagy - animal	7/121	105/9434	0.0666667	5.1978	4.93028	0.000386565	0.00110445	0.000435406	NRAS/KRAS/MAPK8/HRAS/MAPK10/HIF1A/VCP	7
Human Diseases	Substance dependence	hsa05030	Cocaine addiction	5/121	49/9434	0.102041	7.95581	5.56418	0.00038805	0.00110445	0.000435406	GRIN2B/GRIN1/GRIN3A/GRIN2D/GRIN2A	5
Human Diseases	Infectious disease: bacterial	hsa05133	Pertussis	6/121	78/9434	0.0769231	5.99746	5.05154	0.000475592	0.0013389	0.000527831	MAPK8/TNF/MAPK10/CASP3/MAPK14/CASP1	6
Cellular Processes	Cellular community - eukaryotes	hsa04550	Signaling pathways regulating pluripotency of stem cells	8/121	144/9434	0.0555556	4.3315	4.59183	0.000510855	0.0014227	0.00056087	NRAS/KRAS/HRAS/FGFR1/MAPK14/JAK2/MAP2K1/RAF1	8
Organismal Systems	Development and regeneration	hsa04360	Axon guidance	9/121	184/9434	0.048913	3.8136	4.39312	0.000580889	0.00160053	0.000630977	L1CAM/NRAS/SHH/KRAS/HRAS/SMO/PRKCA/RAF1/ABL1	9
Organismal Systems	Nervous system	hsa04724	Glutamatergic synapse	7/121	116/9434	0.0603448	4.7049	4.57633	0.000705292	0.00190282	0.000750146	GRIN2B/GRIN1/GRIN3A/GRIN2D/GRIN2A/GRM5/PRKCA	7
Organismal Systems	Nervous system	hsa04725	Cholinergic synapse	7/121	116/9434	0.0603448	4.7049	4.57633	0.000705292	0.00190282	0.000750146	NRAS/KRAS/CACNA1B/HRAS/PRKCA/JAK2/MAP2K1	7
Metabolism	Glycan biosynthesis and metabolism	hsa00603	Glycosphingolipid biosynthesis - globo and isoglobo series	3/121	16/9434	0.1875	14.6188	6.2143	0.00102023	0.00272413	0.00107393	NAGA/HEXA/HEXB	3
Human Diseases	Infectious disease: bacterial	hsa05130	Pathogenic Escherichia coli infection	9/121	203/9434	0.044335	3.45666	4.03313	0.00117018	0.00309261	0.0012192	MAPK8/TNF/ACTB/MAPK10/F2R/CASP3/MAPK14/CASP1/ABL1	9
Human Diseases	Infectious disease: viral	hsa05169	Epstein-Barr virus infection	9/121	204/9434	0.0441176	3.43972	4.01538	0.00121119	0.00316866	0.00124918	MAPK8/NCOR2/TNF/MAPK10/CASP3/MAPK14/CCND1/CDK4/CCND2	9
Human Diseases	Infectious disease: bacterial	hsa05132	Salmonella infection	10/121	251/9434	0.0398406	3.10625	3.85503	0.001411	0.00365448	0.0014407	MAPK8/HRAS/TNF/ACTB/MAPK10/CASP3/MAPK14/MAP2K1/CASP1/RAF1	10
Organismal Systems	Environmental adaptation	hsa04713	Circadian entrainment	6/121	97/9434	0.0618557	4.8227	4.31345	0.00150216	0.00382563	0.00150818	GRIN2B/GRIN1/NOS1/GRIN2D/GRIN2A/PRKCA	6
Organismal Systems	Nervous system	hsa04728	Dopaminergic synapse	7/121	132/9434	0.0530303	4.13461	4.13385	0.00150662	0.00382563	0.00150818	GRIN2B/CACNA1B/MAPK8/MAPK10/GRIN2A/PRKCA/MAPK14	7
Metabolism	Glycan biosynthesis and metabolism	hsa00531	Glycosaminoglycan degradation	3/121	19/9434	0.157895	12.3106	5.62502	0.00171651	0.00431628	0.0017016	NAGLU/HEXA/HEXB	3
Human Diseases	Infectious disease: bacterial	hsa05135	Yersinia infection	7/121	138/9434	0.0507246	3.95484	3.98565	0.00194486	0.00484344	0.00190942	MAPK8/TNF/ACTB/MAPK10/MAPK14/MAP2K1/CASP1	7
Human Diseases	Cardiovascular disease	hsa05416	Viral myocarditis	5/121	70/9434	0.0714286	5.56907	4.37339	0.00198896	0.00490609	0.00193412	NOS1/ACTB/CASP3/CCND1/ABL1	5
Organismal Systems	Endocrine system	hsa04915	Estrogen signaling pathway	7/121	139/9434	0.0503597	3.92639	3.96176	0.00202662	0.00495183	0.00195215	NRAS/KRAS/HRAS/PRKCD/EGFR/MAP2K1/RAF1	7
Environmental Information Processing	Signal transduction	hsa04371	Apelin signaling pathway	7/121	140/9434	0.05	3.89835	3.93809	0.00211101	0.00507934	0.00200242	NRAS/NOS1/KRAS/HRAS/MAP2K1/CCND1/RAF1	7
Human Diseases	Infectious disease: bacterial	hsa05120	Epithelial cell signaling in Helicobacter pylori infection	5/121	71/9434	0.0704225	5.49063	4.32914	0.00211803	0.00507934	0.00200242	MAPK8/MAPK10/EGFR/CASP3/MAPK14	5
Organismal Systems	Immune system	hsa04620	Toll-like receptor signaling pathway	6/121	109/9434	0.0550459	4.29176	3.93994	0.00271869	0.00640128	0.00252357	MAPK8/TNF/MAPK10/CTSK/MAPK14/MAP2K1	6
Organismal Systems	Immune system	hsa04659	Th17 cell differentiation	6/121	109/9434	0.0550459	4.29176	3.93994	0.00271869	0.00640128	0.00252357	MAPK8/MAPK10/HIF1A/RORA/MAPK14/JAK2	6
Human Diseases	Neurodegenerative disease	hsa05014	Amyotrophic lateral sclerosis	12/121	371/9434	0.032345	2.52184	3.40874	0.00281671	0.00657233	0.002591	GRIN2B/GRIN1/NOS1/HNRNPA1/GRIN2D/TNF/ACTB/GRIN2A/CASP3/VCP/MAPK14/CASP1	12
Environmental Information Processing	Signal transduction	hsa04066	HIF-1 signaling pathway	6/121	110/9434	0.0545455	4.25274	3.91127	0.00284596	0.00658128	0.00259453	VEGFA/FLT1/HIF1A/EGFR/PRKCA/MAP2K1	6
Organismal Systems	Immune system	hsa04621	NOD-like receptor signaling pathway	8/121	189/9434	0.042328	3.30019	3.64094	0.0029283	0.00671176	0.00264597	MAPK8/TNF/MAPK10/PRKCD/MAPK14/CASP1/P2RX7/CTSB	8
Organismal Systems	Endocrine system	hsa04914	Progesterone-mediated oocyte maturation	6/121	111/9434	0.0540541	4.21443	3.88294	0.00297764	0.00674787	0.0026602	KRAS/MAPK8/MAPK10/MAPK14/MAP2K1/RAF1	6
Metabolism	Glycan biosynthesis and metabolism	hsa00514	Other types of O-glycan biosynthesis	4/121	47/9434	0.0851064	6.63548	4.41458	0.003001	0.00674787	0.0026602	OGT/ST3GAL3/GALNT2/B4GALT1	4
Metabolism	Glycan biosynthesis and metabolism	hsa00515	Mannose type O-glycan biosynthesis	3/121	23/9434	0.130435	10.1696	5.01845	0.00302221	0.00674787	0.0026602	ST3GAL3/POMGNT1/B4GALT1	3
Human Diseases	Infectious disease: parasitic	hsa05145	Toxoplasmosis	6/121	112/9434	0.0535714	4.1768	3.85494	0.00311384	0.00689302	0.00271743	MAPK8/TNF/MAPK10/CASP3/MAPK14/JAK2	6
Human Diseases	Endocrine and metabolic disease	hsa04934	Cushing syndrome	7/121	155/9434	0.0451613	3.52109	3.60725	0.00373371	0.00819517	0.00323077	KMT2D/KMT2A/EGFR/MAP2K1/CCND1/CDK4/CRHR1	7
Environmental Information Processing	Signal transduction	hsa04150	mTOR signaling pathway	7/121	158/9434	0.0443038	3.45423	3.54598	0.00414888	0.0090299	0.00355985	NRAS/KRAS/HRAS/TNF/PRKCA/MAP2K1/RAF1	7
Environmental Information Processing	Signal transduction	hsa04668	TNF signaling pathway	6/121	119/9434	0.0504202	3.93111	3.66764	0.00420151	0.00906826	0.00357497	MAPK8/TNF/MAPK10/CASP3/MAPK14/MAP2K1	6
Human Diseases	Cancer: overview	hsa05203	Viral carcinogenesis	8/121	205/9434	0.0390244	3.04261	3.37022	0.00479349	0.0102604	0.00404496	NRAS/KRAS/HRAS/YWHAG/CASP3/CCND1/CDK4/CCND2	8
Environmental Information Processing	Signal transduction	hsa04340	Hedgehog signaling pathway	4/121	56/9434	0.0714286	5.56907	3.90876	0.00565755	0.0119131	0.00469647	SHH/SMO/CCND1/CCND2	4
Human Diseases	Infectious disease: bacterial	hsa05134	Legionellosis	4/121	56/9434	0.0714286	5.56907	3.90876	0.00565755	0.0119131	0.00469647	TNF/CASP3/VCP/CASP1	4
Environmental Information Processing	Signal transduction	hsa04630	JAK-STAT signaling pathway	7/121	168/9434	0.0416667	3.24862	3.35195	0.00578913	0.0120918	0.00476694	HRAS/PDGFRB/EGFR/JAK2/CCND1/CCND2/RAF1	7
Organismal Systems	Immune system	hsa04662	B cell receptor signaling pathway	5/121	91/9434	0.0549451	4.2839	3.5879	0.00617877	0.0128024	0.00504708	NRAS/KRAS/HRAS/MAP2K1/RAF1	5
Human Diseases	Drug resistance: antineoplastic	hsa01523	Antifolate resistance	3/121	30/9434	0.1	7.79669	4.24986	0.00649148	0.0133436	0.00526043	ATIC/TNF/ABCG2	3
Organismal Systems	Immune system	hsa04657	IL-17 signaling pathway	5/121	95/9434	0.0526316	4.10352	3.46529	0.00739375	0.0150668	0.00593976	MAPK8/TNF/MAPK10/CASP3/MAPK14	5
Organismal Systems	Circulatory system	hsa04270	Vascular smooth muscle contraction	6/121	134/9434	0.0447761	3.49106	3.3103	0.00744614	0.0150668	0.00593976	ADM/PRKCD/PRKCA/ADORA2A/MAP2K1/RAF1	6
Cellular Processes	Cell growth and death	hsa04215	Apoptosis - multiple species	3/121	32/9434	0.09375	7.3094	4.07498	0.00778464	0.0156296	0.00616165	MAPK8/MAPK10/CASP3	3
Human Diseases	Infectious disease: bacterial	hsa05152	Tuberculosis	7/121	182/9434	0.0384615	2.99873	3.10345	0.00884645	0.0174938	0.00689658	MAPK8/TNF/MAPK10/CASP3/MAPK14/JAK2/RAF1	7
Human Diseases	Infectious disease: viral	hsa05162	Measles	6/121	139/9434	0.0431655	3.36548	3.20239	0.00884824	0.0174938	0.00689658	MAPK8/MAPK10/CASP3/CCND1/CDK4/CCND2	6
Human Diseases	Cardiovascular disease	hsa05418	Fluid shear stress and atherosclerosis	6/121	142/9434	0.0422535	3.29438	3.13998	0.00977523	0.0191802	0.00756139	MAPK8/TNF/ACTB/MAPK10/VEGFA/MAPK14	6
Organismal Systems	Development and regeneration	hsa04380	Osteoclast differentiation	6/121	143/9434	0.041958	3.27134	3.11955	0.0100991	0.0196666	0.00775316	MAPK8/TNF/MAPK10/CTSK/MAPK14/MAP2K1	6
Human Diseases	Endocrine and metabolic disease	hsa04936	Alcoholic liver disease	6/121	144/9434	0.0416667	3.24862	3.09929	0.0104305	0.0201605	0.00794784	MAPK8/TNF/MAPK10/CASP3/MAPK14/CCND1	6
Metabolism	Global and overview maps	hsa01250	Biosynthesis of nucleotide sugars	3/121	37/9434	0.0810811	6.32164	3.69679	0.0116431	0.0223375	0.00880609	GNE/MPI/GCK	3
Organismal Systems	Immune system	hsa04062	Chemokine signaling pathway	7/121	193/9434	0.0362694	2.82782	2.92432	0.0119766	0.0228083	0.00899169	NRAS/KRAS/HRAS/PRKCD/JAK2/MAP2K1/RAF1	7
Organismal Systems	Endocrine system	hsa04920	Adipocytokine signaling pathway	4/121	70/9434	0.0571429	4.45525	3.30728	0.012319	0.0232892	0.00918129	MAPK8/TNF/MAPK10/JAK2	4
Human Diseases	Endocrine and metabolic disease	hsa04931	Insulin resistance	5/121	109/9434	0.0458716	3.57647	3.0838	0.0129494	0.0241375	0.00951571	OGT/MAPK8/TNF/MAPK10/PRKCD	5
Organismal Systems	Immune system	hsa04613	Neutrophil extracellular trap formation	7/121	196/9434	0.0357143	2.78453	2.87764	0.0129541	0.0241375	0.00951571	ACTB/ELANE/PRKCA/MAPK14/MAP2K1/CASP1/RAF1	7
Metabolism	Glycan biosynthesis and metabolism	hsa00533	Glycosaminoglycan biosynthesis - keratan sulfate	2/121	14/9434	0.142857	11.1381	4.32683	0.013424	0.0248344	0.00979045	ST3GAL3/B4GALT1	2
Organismal Systems	Immune system	hsa04622	RIG-I-like receptor signaling pathway	4/121	72/9434	0.0555556	4.3315	3.2344	0.013556	0.0249007	0.00981657	MAPK8/TNF/MAPK10/MAPK14	4
Metabolism	Glycan biosynthesis and metabolism	hsa00604	Glycosphingolipid biosynthesis - ganglio series	2/121	15/9434	0.133333	10.3956	4.15088	0.0153605	0.0279777	0.0110296	HEXA/HEXB	2
Cellular Processes	Transport and catabolism	hsa04148	Efferocytosis	6/121	157/9434	0.0382166	2.97963	2.85103	0.0154697	0.0279777	0.0110296	HIF1A/CASP3/MAPK14/JAK2/MAP2K1/CASP1	6
Cellular Processes	Cell growth and death	hsa04115	p53 signaling pathway	4/121	75/9434	0.0533333	4.15824	3.12992	0.0155552	0.0279777	0.0110296	CASP3/CCND1/CDK4/CCND2	4
Cellular Processes	Cell growth and death	hsa04110	Cell cycle	6/121	158/9434	0.0379747	2.96077	2.83301	0.0159166	0.0283469	0.0111752	YWHAG/RAD21/CCND1/CDK4/CCND2/ABL1	6
Human Diseases	Infectious disease: bacterial	hsa05131	Shigellosis	8/121	253/9434	0.0316206	2.46536	2.69297	0.0159793	0.0283469	0.0111752	MAPK8/TNF/ACTB/MAPK10/PRKCD/EGFR/MAPK14/CASP1	8
Cellular Processes	Cell growth and death	hsa04217	Necroptosis	6/121	159/9434	0.0377358	2.94215	2.81512	0.0163724	0.0288466	0.0113721	MAPK8/TNF/MAPK10/PARP1/JAK2/CASP1	6
Environmental Information Processing	Signal transduction	hsa04310	Wnt signaling pathway	6/121	174/9434	0.0344828	2.68852	2.5624	0.024327	0.0424632	0.0167402	PORCN/MAPK8/MAPK10/PRKCA/CCND1/CCND2	6
Organismal Systems	Sensory system	hsa04742	Taste transduction	4/121	86/9434	0.0465116	3.62637	2.78881	0.0244286	0.0424632	0.0167402	GABRA3/GABRA1/GABRA5/GABRA2	4
Organismal Systems	Aging	hsa04211	Longevity regulating pathway	4/121	90/9434	0.0444444	3.4652	2.67842	0.0282798	0.0488297	0.0192501	NRAS/KRAS/EHMT1/HRAS	4
