# Supplementary material for: Study on the Mechanism of DNHP's Effects on Brain Damage Based on Network Toxicology
Source: Research Square preprint supplement (doi:10.21203/rs.3.rs-7966294/v1), 2025-12-01
Supplement: Supplementary file 4 [file 2b28b7d0ae3833c0a6ab5d13.xlsx]

## Sheet: ChEMBL.result
Symbol	ChEMBL ID	Name	UniProt Accessions	Type	Organism	Compounds	Activities	Tax ID	Species Group Flag
NA	CHEMBL2364037	N-acetylmuramic acid	NA	SMALL MOLECULE	Bacteria	NA	NA	2	TRUE
UPB1	CHEMBL3430874	Beta-ureidopropionase	Q9UBR1	SINGLE PROTEIN	Homo sapiens	NA	NA	9606	FALSE
NA	CHEMBL2364038	N-acetylglucosamine	NA	SMALL MOLECULE	Bacteria	NA	NA	2	TRUE
NAA16	CHEMBL3430873	N-alpha-acetyltransferase 16, NatA auxiliary subunit	Q6N069	SINGLE PROTEIN	Homo sapiens	NA	NA	9606	FALSE
NA|NA|NA	CHEMBL3885653	Voltage-dependent L-type calcium channel subunit beta-1/alpha-1B/alpha-2/delta-1	P54290|Q02294|P54283	PROTEIN COMPLEX	Rattus norvegicus	25	26	10116	FALSE
FKBP4	CHEMBL4050	FK506 binding protein 4	Q02790	SINGLE PROTEIN	Homo sapiens	225	279	9606	FALSE
FUT3	CHEMBL3269	Galactoside 3(4)-L-fucosyltransferase	P21217	SINGLE PROTEIN	Homo sapiens	5	5	9606	FALSE
NA	CHEMBL1075208	UDP-N-acetylglucosamine 1-carboxyvinyltransferase	Q9HVW7	SINGLE PROTEIN	Pseudomonas aeruginosa (strain ATCC 15692 / PAO1 / 1C / PRS 101 / LMG12228)	9	11	208964	FALSE
NEU2	CHEMBL3200	Sialidase 2	Q9Y3R4	SINGLE PROTEIN	Homo sapiens	233	382	9606	FALSE
NA	CHEMBL5169099	Serine/threonine-protein kinase 3	O54748	SINGLE PROTEIN	Rattus norvegicus	1	12	10116	FALSE
SMYD3	CHEMBL2321643	Histone-lysine N-methyltransferase SMYD3	Q9H7B4	SINGLE PROTEIN	Homo sapiens	162	323	9606	FALSE
ENGASE	CHEMBL5172	Endo-beta-N-acetylglucosaminidase	Q8NFI3	SINGLE PROTEIN	Homo sapiens	51	63	9606	FALSE
HEXB|HEXA	CHEMBL3038485	Beta-N-acetyl-D-hexosaminidase-A/B	P07686|P06865	PROTEIN FAMILY	Homo sapiens	50	71	9606	FALSE
METTL21A	CHEMBL3588741	Protein N-lysine methyltransferase METTL21A	Q8WXB1	SINGLE PROTEIN	Homo sapiens	29	30	9606	FALSE
EIF2A	CHEMBL4295938	Eukaryotic translation initiation factor 2A	Q9BY44	SINGLE PROTEIN	Homo sapiens	1	1	9606	FALSE
VEGFA|KDR	CHEMBL5482997	VEGFR2-VEGA	P15692|P35968	PROTEIN COMPLEX	Homo sapiens	2	2	9606	FALSE
L1CAM	CHEMBL5169129	Neural cell adhesion molecule L1	P32004	SINGLE PROTEIN	Homo sapiens	1	1	9606	FALSE
DOT1L	CHEMBL1795117	Histone-lysine N-methyltransferase, H3 lysine-79 specific	Q8TEK3	SINGLE PROTEIN	Homo sapiens	410	671	9606	FALSE
PKN1|RHOA	CHEMBL4523644	Serine/threonine-protein kinase N1/Transforming protein RhoA	Q16512|P61586	PROTEIN COMPLEX	Homo sapiens	1	1	9606	FALSE
TYMS|ATIC	CHEMBL3885527	Thymidylate synthase/AICAR transformylase	P04818|P31939	PROTEIN FAMILY	Homo sapiens	5	5	9606	FALSE
CERS4	CHEMBL5291570	Ceramide synthase 4	Q9HA82	SINGLE PROTEIN	Homo sapiens	1	1	9606	FALSE
NA|NA|NA|NA|NA|NA|NA|NA|GRID1|NA|NA|NA|NA|NA|NA|NA|NA|GRID2	CHEMBL4524129	Glutamate (NMDA/AMPA/Kainate)	P35439|Q00959|Q00960|Q00961|Q62645|Q8VHN2|Q9R1M7|P22756|Q9ULK0|Q01812|P19491|P19492|P19493|P42260|P42264|P19490|Q63273|O43424	PROTEIN COMPLEX GROUP	Rattus norvegicus	1	1	10116	FALSE
NA	CHEMBL4739840	Histone-lysine N-methyltransferase EZH2	B5DFE2	SINGLE PROTEIN	Rattus norvegicus	1	1	10116	FALSE
NA	CHEMBL2658	Neuronal acetylcholine receptor subunit beta-4	P12392	SINGLE PROTEIN	Rattus norvegicus	8	8	10116	FALSE
NA	CHEMBL5291518	Ceramide synthase 2	Q924Z4	SINGLE PROTEIN	Mus musculus	1	1	10090	FALSE
FGFR1|VHL	CHEMBL5291688	VHL/FGFR1	P11362|P40337	PROTEIN-PROTEIN INTERACTION	Homo sapiens	6	21	9606	FALSE
NA	CHEMBL3407315	Formyl peptide receptor-related sequence 1	O08790	SINGLE PROTEIN	Mus musculus	15	29	10090	FALSE
FMO3|FMO2|FMO4|FMO5|FMO1	CHEMBL3542432	Flavin-containing monooxygenase	P31513|Q99518|P31512|P49326|Q01740	PROTEIN FAMILY	Homo sapiens	1	1	9606	FALSE
KMT2D	CHEMBL2189114	Histone-lysine N-methyltransferase MLL2	O14686	SINGLE PROTEIN	Homo sapiens	16	17	9606	FALSE
SUV39H2	CHEMBL1795177	Histone-lysine N-methyltransferase SUV39H2	Q9H5I1	SINGLE PROTEIN	Homo sapiens	524	537	9606	FALSE
NSD2	CHEMBL3108645	Histone-lysine N-methyltransferase NSD2	O96028	SINGLE PROTEIN	Homo sapiens	813	932	9606	FALSE
NA	CHEMBL5691	Poly [ADP-ribose] polymerase 1	P18493	SINGLE PROTEIN	Bos taurus	4	5	9913	FALSE
NA	CHEMBL2366061	CPC-N	NA	CELL-LINE	Homo sapiens	77	78	9606	FALSE
NA	CHEMBL2052030	Phosphoethanolamine N-methyltransferase	Q8IDQ9	SINGLE PROTEIN	Plasmodium falciparum	7	8	5833	FALSE
NA	CHEMBL1293297	Bifunctional protein glmU	P9WMN3	SINGLE PROTEIN	Mycobacterium tuberculosis	125	126	1773	FALSE
NA	CHEMBL5538	Histone-arginine methyltransferase CARM1	Q9WVG6	SINGLE PROTEIN	Mus musculus	51	53	10090	FALSE
STK4|STK3	CHEMBL4523663	Serine/threonine-protein kinase 3/4	Q13043|Q13188	PROTEIN FAMILY	Homo sapiens	1	3	9606	FALSE
NA	CHEMBL2331070	Acid ceramidase	Q6P7S1	SINGLE PROTEIN	Rattus norvegicus	48	68	10116	FALSE
NA	CHEMBL5452	Serotonin N-acetyltransferase	Q29495	SINGLE PROTEIN	Ovis aries	45	120	9940	FALSE
NA	CHEMBL5244	UDP-3-O-acyl-GlcNAc deacetylase	P0A725	SINGLE PROTEIN	Escherichia coli K-12	330	457	83333	FALSE
NA	CHEMBL5291575	tRNA (guanine-N(1)-)-methyltransferase	P0A873	SINGLE PROTEIN	Escherichia coli (strain K12)	38	44	83333	FALSE
NRAS	CHEMBL2079845	GTPase NRas	P01111	SINGLE PROTEIN	Homo sapiens	4	8	9606	FALSE
RAF1|KRAS	CHEMBL5291977	GTPase KRas/RAF1	P04049|P01116	PROTEIN-PROTEIN INTERACTION	Homo sapiens	4	4	9606	FALSE
NA	CHEMBL4879456	Alpha-1,6-mannosyl-glycoprotein 2-beta-N-acetylglucosaminyltransferase	Q09326	SINGLE PROTEIN	Rattus norvegicus	3	3	10116	FALSE
PRMT8	CHEMBL3108648	Protein arginine N-methyltransferase 8	Q9NR22	SINGLE PROTEIN	Homo sapiens	121	143	9606	FALSE
NA	CHEMBL3528	Neutral sphingomyelinase	Q9ET64	SINGLE PROTEIN	Rattus norvegicus	50	61	10116	FALSE
MGAT3	CHEMBL2375206	Beta-1,4-mannosyl-glycoprotein 4-beta-N-acetylglucosaminyltransferase	Q09327	SINGLE PROTEIN	Homo sapiens	24	40	9606	FALSE
KMT5B	CHEMBL2321645	Histone-lysine N-methyltransferase SUV420H1	Q4FZB7	SINGLE PROTEIN	Homo sapiens	50	61	9606	FALSE
NOS1|NOS2	CHEMBL2096621	Nitric oxide sythases; iNOS & nNOS	P29475|P35228	SELECTIVITY GROUP	Homo sapiens	609	702	9606	FALSE
NA	CHEMBL2266	Gamma-amino-N-butyrate transaminase	P80147	SINGLE PROTEIN	Sus scrofa	57	192	9823	FALSE
NTMT2	CHEMBL4630834	Alpha N-terminal protein methyltransferase 1B	Q5VVY1	SINGLE PROTEIN	Homo sapiens	8	8	9606	FALSE
CACNA1B|APBA1	CHEMBL2097170	Voltage-gated N-type calcium channel alpha-1B subunit/Amyloid beta A4 precursor protein-binding family A member 1	Q00975|Q02410	PROTEIN-PROTEIN INTERACTION	Homo sapiens	451	925	9606	FALSE
GRIN2B	CHEMBL1904	Glutamate [NMDA] receptor subunit epsilon 2	Q13224	SINGLE PROTEIN	Homo sapiens	334	507	9606	FALSE
PRDM9	CHEMBL3588737	Histone-lysine N-methyltransferase PRDM9	Q9NQV7	SINGLE PROTEIN	Homo sapiens	45	57	9606	FALSE
NA|NA	CHEMBL4106165	N+/K+ ATPase alpha-4/beta-1	Q64541|P07340	PROTEIN COMPLEX	Rattus norvegicus	23	23	10116	FALSE
NA	CHEMBL4296287	Glycylpeptide N-tetradecanoyltransferase	A5K1A2	SINGLE PROTEIN	Plasmodium vivax (strain Salvador I)	3	3	126793	FALSE
NA	CHEMBL3241	Histamine N-methyltransferase	Q01984	SINGLE PROTEIN	Rattus norvegicus	36	36	10116	FALSE
NA	CHEMBL4523949	Protein arginine N-methyltransferase 7	Q582G4	SINGLE PROTEIN	Trypanosoma brucei brucei (strain 927/4 GUTat10.1)	1	1	185431	FALSE
NA	CHEMBL4295614	Peptidoglycan-N-acetylglucosamine deacetylase BC_1974	Q81EJ6	SINGLE PROTEIN	Bacillus cereus (strain ATCC 14579 / DSM 31 / JCM 2152 / NBRC 15305 /NCIMB 9373 / NRRL B-3711)	1	4	226900	FALSE
CERS5	CHEMBL5291585	Ceramide synthase 5	Q8N5B7	SINGLE PROTEIN	Homo sapiens	1	1	9606	FALSE
AK2	CHEMBL4938	Adenylate kinase 2	P54819	SINGLE PROTEIN	Homo sapiens	252	264	9606	FALSE
NTHL1	CHEMBL4523264	Endonuclease III-like protein 1	P78549	SINGLE PROTEIN	Homo sapiens	20	51	9606	FALSE
NA|NA	CHEMBL4662932	Shiga toxin 2	P09385|P09386	PROTEIN COMPLEX	Escherichia coli O157:H7	8523	8579	83334	FALSE
NA	CHEMBL3957	Phospho-N-acetylmuramoyl-pentapeptide-transferase	P0A6W3	SINGLE PROTEIN	Escherichia coli K-12	146	152	83333	FALSE
MEP1A	CHEMBL4105775	Meprin A subunit alpha	Q16819	SINGLE PROTEIN	Homo sapiens	9	11	9606	FALSE
MEP1B	CHEMBL4105879	Meprin A subunit beta	Q16820	SINGLE PROTEIN	Homo sapiens	90	94	9606	FALSE
MYOC	CHEMBL4105967	Myocilin	Q99972	SINGLE PROTEIN	Homo sapiens	12	24	9606	FALSE
B3GNT2	CHEMBL5465363	N-acetyllactosaminide beta-1,3-N-acetylglucosaminyltransferase 2	Q9NY97	SINGLE PROTEIN	Homo sapiens	42	42	9606	FALSE
NA	CHEMBL5291538	Ceramide synthase 1	P27545	SINGLE PROTEIN	Mus musculus	1	1	10090	FALSE
GNMT	CHEMBL4523295	Glycine N-methyltransferase	Q14749	SINGLE PROTEIN	Homo sapiens	42	70	9606	FALSE
NA|NA|NA	CHEMBL4888451	c-Jun N-terminal kinase	Q91Y86|Q9WTU6|Q61831	PROTEIN FAMILY	Mus musculus	19	21	10090	FALSE
NA	CHEMBL4879522	Unconventional myosin-XVIIIa	Q9JMH9	SINGLE PROTEIN	Mus musculus	1	1	10090	FALSE
ATIC	CHEMBL2518	AICAR transformylase	P31939	SINGLE PROTEIN	Homo sapiens	206	259	9606	FALSE
CHST4	CHEMBL2239	Carbohydrate (N-acetylglucosamine 6-O) sulfotransferase 4	Q8NCG5	SINGLE PROTEIN	Homo sapiens	2	4	9606	FALSE
PRDM16	CHEMBL5214855	Histone-lysine N-methyltransferase PRDM16	Q9HAZ2	SINGLE PROTEIN	Homo sapiens	1	1	9606	FALSE
NSD3|VHL	CHEMBL5465523	VHL/NSD3	Q9BZ95|P40337	PROTEIN-PROTEIN INTERACTION	Homo sapiens	2	3	9606	FALSE
CERS2	CHEMBL5291553	Ceramide synthase 2	Q96G23	SINGLE PROTEIN	Homo sapiens	2	3	9606	FALSE
NA	CHEMBL5291555	Ceramide synthase 5	Q9D6K9	SINGLE PROTEIN	Mus musculus	1	1	10090	FALSE
PEF1	CHEMBL4105771	Peflin	Q9UBV8	SINGLE PROTEIN	Homo sapiens	2	2	9606	FALSE
NA	CHEMBL5291605	Sphingomyelin phosphodiesterase 2	O70572	SINGLE PROTEIN	Mus musculus	5	5	10090	FALSE
NA	CHEMBL1075578	SK-N-AS	NA	CELL-LINE	Homo sapiens	178	244	9606	FALSE
VHL|BANF1	CHEMBL5169063	VHL/BANF1	P40337|O75531	PROTEIN-PROTEIN INTERACTION	Homo sapiens	1	2	9606	FALSE
NA	CHEMBL342	Glutamate [NMDA] receptor subunit 3A	Q9R1M7	SINGLE PROTEIN	Rattus norvegicus	20	29	10116	FALSE
B3GALT1	CHEMBL2321634	Beta-1,3-galactosyltransferase 1	Q9Y5Z6	SINGLE PROTEIN	Homo sapiens	3	5	9606	FALSE
OGT	CHEMBL5955	UDP-N-acetylglucosamine--peptide N-acetylglucosaminyltransferase 110 kDa subunit	O15294	SINGLE PROTEIN	Homo sapiens	121	206	9606	FALSE
MAP2K7	CHEMBL3530	Dual specificity mitogen-activated protein kinase kinase 7	O14733	SINGLE PROTEIN	Homo sapiens	911	1180	9606	FALSE
NA	CHEMBL5169120	GTPase HRas	P20171	SINGLE PROTEIN	Rattus norvegicus	1	1	10116	FALSE
NA	CHEMBL3740	Poly [ADP-ribose] polymerase-1	P11103	SINGLE PROTEIN	Mus musculus	126	176	10090	FALSE
MGAT2	CHEMBL2321630	Alpha-1,6-mannosyl-glycoprotein 2-beta-N-acetylglucosaminyltransferase	Q10469	SINGLE PROTEIN	Homo sapiens	527	722	9606	FALSE
GRIN1	CHEMBL2015	Glutamate (NMDA) receptor subunit zeta 1	Q05586	SINGLE PROTEIN	Homo sapiens	83	126	9606	FALSE
NA	CHEMBL2396510	RocR	Q9HX69	SINGLE PROTEIN	Pseudomonas aeruginosa (strain ATCC 15692 / PAO1 / 1C / PRS 101 / LMG12228)	4	6	208964	FALSE
NA	CHEMBL303	Glutamate [NMDA] receptor subunit epsilon 4	Q62645	SINGLE PROTEIN	Rattus norvegicus	102	130	10116	FALSE
CACNA2D1|CACNA1B|CACNB3	CHEMBL3430901	Voltage-dependent N-type calcium channel subunit alpha-1B/Voltage-dependent calcium channel subunit alpha-2/delta-1/Voltage-dependent L-type calcium channel subunit beta-3	P54289|Q00975|P54284	PROTEIN COMPLEX	Homo sapiens	1	2	9606	FALSE
CDC37	CHEMBL1795123	Hsp90 co-chaperone Cdc37	Q16543	SINGLE PROTEIN	Homo sapiens	10	21	9606	FALSE
NA	CHEMBL5655	Alpha-N-acetylgalactosaminidase	Q90744	SINGLE PROTEIN	Gallus gallus	22	22	9031	FALSE
ACER2	CHEMBL2331067	Alkaline ceramidase 2	Q5QJU3	SINGLE PROTEIN	Homo sapiens	1	1	9606	FALSE
NA|NA	CHEMBL4523607	Neuronal acetylcholine receptor subunit alpha-6/beta-4	P12392|P43143	PROTEIN COMPLEX	Rattus norvegicus	5	6	10116	FALSE
NA	CHEMBL4105793	Nucleoprotein	P03418	SINGLE PROTEIN	Human respiratory syncytial virus A (strain A2)	1	2	11259	FALSE
NA	CHEMBL2169718	Histone-lysine N-methyltransferase EHMT2	Q9Z148	SINGLE PROTEIN	Mus musculus	8	20	10090	FALSE
NA	CHEMBL2169717	Histone-lysine N-methyltransferase pr-set7	Q9VFK6	SINGLE PROTEIN	Drosophila melanogaster	1	2	7227	FALSE
NA	CHEMBL4325	Aminopeptidase N	P04825	SINGLE PROTEIN	Escherichia coli K-12	5	5	83333	FALSE
NA	CHEMBL4295568	rRNA adenine N-6-methyltransferase	P0A0H2	SINGLE PROTEIN	Staphylococcus aureus (strain N315)	49	103	158879	FALSE
RIOK1|PRMT5	CHEMBL5483002	PRMT5-Riok1	Q9BRS2|O14744	PROTEIN-PROTEIN INTERACTION	Homo sapiens	2	4	9606	FALSE
PRMT6	CHEMBL1275221	Protein arginine N-methyltransferase 6	Q96LA8	SINGLE PROTEIN	Homo sapiens	258	392	9606	FALSE
PRMT7	CHEMBL3562175	Protein arginine N-methyltransferase 7	Q9NVM4	SINGLE PROTEIN	Homo sapiens	86	120	9606	FALSE
MAPK9	CHEMBL4179	c-Jun N-terminal kinase 2	P45984	SINGLE PROTEIN	Homo sapiens	3716	4887	9606	FALSE
NA|NA|NA	CHEMBL4296071	Sialidase 2/3/4	Q9JMH7|Q8BZL1|Q9JMH3	PROTEIN FAMILY	Mus musculus	2	2	10090	FALSE
NA	CHEMBL1932901	Undecaprenyl-phosphate alpha-N-acetylglucosaminyl 1-phosphate transferase	Q9X1N5	SINGLE PROTEIN	Thermotoga maritima (strain ATCC 43589 / MSB8 / DSM 3109 / JCM 10099)	4	4	243274	FALSE
ASAH2	CHEMBL2021754	Neutral ceramidase	Q9NR71	SINGLE PROTEIN	Homo sapiens	51	95	9606	FALSE
DDAH1	CHEMBL6036	N(G),N(G)-dimethylarginine dimethylaminohydrolase 1	O94760	SINGLE PROTEIN	Homo sapiens	90	275	9606	FALSE
PARP1|VHL	CHEMBL4748223	VHL/PARP1	P09874|P40337	PROTEIN-PROTEIN INTERACTION	Homo sapiens	14	21	9606	FALSE
ATIC|GART	CHEMBL3430882	GAR transformylase/AICAR transformylase	P31939|P22102	PROTEIN FAMILY	Homo sapiens	16	35	9606	FALSE
NA	CHEMBL310	Glutamate [NMDA] receptor subunit epsilon 1	Q00959	SINGLE PROTEIN	Rattus norvegicus	130	166	10116	FALSE
NA	CHEMBL2366107	KP-N-RT-BM-1	NA	CELL-LINE	Homo sapiens	25	25	9606	FALSE
SMYD2	CHEMBL2169716	N-lysine methyltransferase SMYD2	Q9NRG4	SINGLE PROTEIN	Homo sapiens	188	410	9606	FALSE
NOS1	CHEMBL3568	Nitric-oxide synthase, brain	P29475	SINGLE PROTEIN	Homo sapiens	1560	1833	9606	FALSE
EHMT2	CHEMBL6032	Histone-lysine N-methyltransferase, H3 lysine-9 specific 3	Q96KQ7	SINGLE PROTEIN	Homo sapiens	91188	93144	9606	FALSE
USP1|WDR48	CHEMBL3430885	Ubiquitin carboxyl-terminal hydrolase 1/WD repeat-containing protein 48	O94782|Q8TAF3	PROTEIN COMPLEX	Homo sapiens	93	106	9606	FALSE
NMT1	CHEMBL2593	Peptide N-myristoyltransferase 1	P30419	SINGLE PROTEIN	Homo sapiens	512	643	9606	FALSE
NA|NA	CHEMBL1907590	Neuronal acetylcholine receptor; alpha2/beta4	P12389|P12392	PROTEIN COMPLEX	Rattus norvegicus	199	232	10116	FALSE
NA	CHEMBL5079	Alpha-galactosidase B	Q58DH9	SINGLE PROTEIN	Bos taurus	4	4	9913	FALSE
NA	CHEMBL3621029	Protein Sirt6	A6K863	SINGLE PROTEIN	Rattus norvegicus	4	8	10116	FALSE
MAPK8|MAPK9	CHEMBL4296098	Mitogen-activated protein kinase 8/9	P45983|P45984	PROTEIN FAMILY	Homo sapiens	7	11	9606	FALSE
ACER1	CHEMBL3351194	Alkaline ceramidase 1	Q8TDN7	SINGLE PROTEIN	Homo sapiens	2	5	9606	FALSE
ST3GAL1	CHEMBL3596074	CMP-N-acetylneuraminate-beta-galactosamide-alpha-2,3-sialyltransferase 1	Q11201	SINGLE PROTEIN	Homo sapiens	11	15	9606	FALSE
GPR18	CHEMBL2384898	N-arachidonyl glycine receptor	Q14330	SINGLE PROTEIN	Homo sapiens	143	433	9606	FALSE
NA	CHEMBL5387	Sonic hedgehog protein	Q62226	SINGLE PROTEIN	Mus musculus	246	356	10090	FALSE
ACOT13	CHEMBL4295957	Acyl-coenzyme A thioesterase 13	Q9NPJ3	SINGLE PROTEIN	Homo sapiens	1	1	9606	FALSE
GAMT	CHEMBL4523290	Guanidinoacetate N-methyltransferase	Q14353	SINGLE PROTEIN	Homo sapiens	1	2	9606	FALSE
TYMS|ATIC|GART	CHEMBL3885528	Thymidylate synthase/GAR transformylase/AICAR transformylase	P04818|P31939|P22102	PROTEIN FAMILY	Homo sapiens	9	14	9606	FALSE
FMO3	CHEMBL3430864	Dimethylaniline monooxygenase [N-oxide-forming] 3	P31513	SINGLE PROTEIN	Homo sapiens	4	9	9606	FALSE
NA	CHEMBL4845621	c-di-GMP G-quadruplex	NA	NUCLEIC-ACID	Pseudomonas aeruginosa	34	84	287	FALSE
NA|NA	CHEMBL3885618	Phospho-N-acetylmuramoyl-pentapeptide-transferase/UDP-N-acetylglucosamine--N-acetylmuramyl-(pentapeptide) pyrophosphoryl-undecaprenol N-acetylglucosamine transferase	P0A6W3|P17443	PROTEIN FAMILY	Escherichia coli K-12	4	4	83333	FALSE
NA	CHEMBL2479	N-acetyllactosaminide alpha-1,3-galactosyltransferase	P23336	SINGLE PROTEIN	Mus musculus	3	6	10090	FALSE
SHH	CHEMBL5602	Sonic hedgehog protein	Q15465	SINGLE PROTEIN	Homo sapiens	34	71	9606	FALSE
NA	CHEMBL5291527	Aminodeoxyfutalosine nucleosidase	Q9ZMY2	SINGLE PROTEIN	Helicobacter pylori (strain J99 / ATCC 700824) (Campylobacter pylori J99)	3	5	85963	FALSE
NA	CHEMBL4295666	Nicotinamide N-methyltransferase	O55239	SINGLE PROTEIN	Mus musculus	32	36	10090	FALSE
NA	CHEMBL4739845	Vesicle-fusing ATPase	P18708	SINGLE PROTEIN	Cricetulus griseus	1	1	10029	FALSE
NA|NA	CHEMBL3038506	Ionotropic glutamate receptor NMDA 1/2D	P35439|Q62645	PROTEIN COMPLEX	Rattus norvegicus	513	870	10116	FALSE
OGA	CHEMBL5921	Bifunctional protein NCOAT	O60502	SINGLE PROTEIN	Homo sapiens	332	460	9606	FALSE
CERS1	CHEMBL5291526	Ceramide synthase 1	P27544	SINGLE PROTEIN	Homo sapiens	4	4	9606	FALSE
SETDB1	CHEMBL2321646	Histone-lysine N-methyltransferase SETDB1	Q15047	SINGLE PROTEIN	Homo sapiens	89	104	9606	FALSE
NA	CHEMBL401	Glutamate [NMDA] receptor subunit epsilon 3	Q00961	SINGLE PROTEIN	Rattus norvegicus	290	367	10116	FALSE
NA	CHEMBL5107	Voltage-gated N-type calcium channel alpha-1B subunit	Q02294	SINGLE PROTEIN	Rattus norvegicus	423	472	10116	FALSE
PORCN	CHEMBL1255163	Probable protein-cysteine N-palmitoyltransferase porcupine	Q9H237	SINGLE PROTEIN	Homo sapiens	95	135	9606	FALSE
EZH2	CHEMBL2189110	Histone-lysine N-methyltransferase EZH2	Q15910	SINGLE PROTEIN	Homo sapiens	1071	2179	9606	FALSE
ABAT	CHEMBL2044	Gamma-amino-N-butyrate transaminase	P80404	SINGLE PROTEIN	Homo sapiens	101	155	9606	FALSE
NA	CHEMBL3708053	Aminoglycoside 2'-N-acetyltransferase	P9WQG9	SINGLE PROTEIN	Mycobacterium tuberculosis (strain ATCC 25618 / H37Rv)	7	7	83332	FALSE
GRIN1|GRIN2A|GRIN2B|GRIN2D|GRIN3B|GRIN2C|GRIN3A	CHEMBL2094124	Glutamate [NMDA] receptor	Q05586|Q12879|Q13224|O15399|O60391|Q14957|Q8TCU5	PROTEIN COMPLEX GROUP	Homo sapiens	671	939	9606	FALSE
NA	CHEMBL2375203	Alpha-1,6-mannosyl-glycoprotein 2-beta-N-acetylglucosaminyltransferase	Q921V5	SINGLE PROTEIN	Mus musculus	83	88	10090	FALSE
NA|NA|NA	CHEMBL3988639	Voltage-dependent N-type calcium channel alpha1B/alpha2b/beta1b	Q8CFG6|Q02294|P54283	PROTEIN COMPLEX	Rattus norvegicus	6	6	10116	FALSE
NA	CHEMBL2590	Aminopeptidase N	P15145	SINGLE PROTEIN	Sus scrofa	1449	1645	9823	FALSE
FGFR3|FGFR1|FGFR4|FGFR2	CHEMBL2095217	Fibroblast growth factor receptor	P22607|P11362|P22455|P21802	PROTEIN FAMILY	Homo sapiens	276	356	9606	FALSE
NA|NA|NA|NA	CHEMBL3137275	Nicotinic acetylcholine receptor alpha6/alpha3/beta2/beta3	P04757|P12390|P12391|P43143	PROTEIN COMPLEX	Rattus norvegicus	62	101	10116	FALSE
KRAS	CHEMBL2189121	GTPase KRas	P01116	SINGLE PROTEIN	Homo sapiens	888	2145	9606	FALSE
NA	CHEMBL4523258	4-aminobutyrate aminotransferase, mitochondrial	P61922	SINGLE PROTEIN	Mus musculus	4	4	10090	FALSE
PCIF1	CHEMBL5465357	mRNA (2'-O-methyladenosine-N(6)-)-methyltransferase	Q9H4Z3	SINGLE PROTEIN	Homo sapiens	4	4	9606	FALSE
NA	CHEMBL3211	CMP-N-acetylneuraminate-beta-1,4-galactoside alpha-2,3-sialyltransferase	Q02734	SINGLE PROTEIN	Rattus norvegicus	29	29	10116	FALSE
NA	CHEMBL4756	Ricin	P02879	SINGLE PROTEIN	Ricinus communis	84	144	3988	FALSE
HTT	CHEMBL5514	Huntingtin	P42858	SINGLE PROTEIN	Homo sapiens	18833	19236	9606	FALSE
NA	CHEMBL4879471	Host cell factor 1	Q61191	SINGLE PROTEIN	Mus musculus	1	1	10090	FALSE
SMYD1	CHEMBL5465333	Histone-lysine N-methyltransferase SMYD1	Q8NB12	SINGLE PROTEIN	Homo sapiens	1	1	9606	FALSE
ASAH1	CHEMBL5463	Acid ceramidase	Q13510	SINGLE PROTEIN	Homo sapiens	285	411	9606	FALSE
NA|NA	CHEMBL1907595	Neuronal acetylcholine receptor; alpha4/beta4	P09483|P12392	PROTEIN COMPLEX	Rattus norvegicus	394	604	10116	FALSE
NA	CHEMBL2034805	N-acylethanolamine-hydrolyzing acid amidase	Q5KTC7	SINGLE PROTEIN	Rattus norvegicus	227	372	10116	FALSE
NA	CHEMBL3048	Nitric-oxide synthase, brain	P29476	SINGLE PROTEIN	Rattus norvegicus	1861	3009	10116	FALSE
NA	CHEMBL4524036	Alpha-1,3-mannosyl-glycoprotein 2-beta-N-acetylglucosaminyltransferase	P27808	SINGLE PROTEIN	Mus musculus	3	3	10090	FALSE
EHMT1	CHEMBL6031	Histone-lysine N-methyltransferase, H3 lysine-9 specific 5	Q9H9B1	SINGLE PROTEIN	Homo sapiens	257	440	9606	FALSE
HNRNPA1	CHEMBL1955709	Heterogeneous nuclear ribonucleoprotein A1	P09651	SINGLE PROTEIN	Homo sapiens	3	8	9606	FALSE
GRIN1|GRIN2C	CHEMBL3038504	Ionotropic glutamate receptor NMDA 1/2C	Q05586|Q14957	PROTEIN COMPLEX	Homo sapiens	13	19	9606	FALSE
NA	CHEMBL3559674	Bifunctional protein GlmU	C3SLB7	SINGLE PROTEIN	Escherichia coli	27	27	562	FALSE
NAT1	CHEMBL5101	Arylamine N-acetyltransferase 1	P18440	SINGLE PROTEIN	Homo sapiens	52	60	9606	FALSE
MAPK10|MAPK9	CHEMBL3038502	JNK2/JNK3	P53779|P45984	PROTEIN FAMILY	Homo sapiens	1	1	9606	FALSE
ADGRG1	CHEMBL4523929	Adhesion G-protein coupled receptor G1	Q9Y653	SINGLE PROTEIN	Homo sapiens	1	1	9606	FALSE
SAT1	CHEMBL4286	Spermidine/spermine N(1)-acetyltransferase 1	P21673	SINGLE PROTEIN	Homo sapiens	37	61	9606	FALSE
ST3GAL3	CHEMBL3596076	CMP-N-acetylneuraminate-beta-1,4-galactoside alpha-2,3-sialyltransferase	Q11203	SINGLE PROTEIN	Homo sapiens	4	4	9606	FALSE
EZH1|EED|SUZ12|AEBP2|RBBP4	CHEMBL3137287	EZH1/SUZ12/EED/AEBP2/RBBP4 complex	Q92800|O75530|Q15022|Q6ZN18|Q09028	PROTEIN COMPLEX	Homo sapiens	29	29	9606	FALSE
KIF3B	CHEMBL6109	Kinesin-like protein KIF3B	O15066	SINGLE PROTEIN	Homo sapiens	35	36	9606	FALSE
NA	CHEMBL2163172	N-acyl-phosphatidylethanolamine-hydrolyzing phospholipase D	Q8BH82	SINGLE PROTEIN	Mus musculus	16	16	10090	FALSE
NA	CHEMBL2034797	Mitogen-activated protein kinase 9	Q9WTU6	SINGLE PROTEIN	Mus musculus	10	10	10090	FALSE
NA|NA|NA	CHEMBL4106156	Ionotropic glutamate receptor NMDA1/2A/2B	P35439|Q00959|Q00960	PROTEIN COMPLEX	Rattus norvegicus	1	1	10116	FALSE
NA|NA|NA	CHEMBL4106146	NIcotinic acetylcholine receptor alpha-3/beta-4/alpha-5	P04757|P12392|P20420	PROTEIN COMPLEX	Rattus norvegicus	2	2	10116	FALSE
NA	CHEMBL5170	beta-actin	O93400	SINGLE PROTEIN	Xenopus laevis	5	5	8355	FALSE
NA	CHEMBL3232681	Nucleoprotein	P33469	SINGLE PROTEIN	Human coronavirus OC43	2	4	31631	FALSE
NA	CHEMBL3309032	UDP-N-acetylmuramoyl-L-alanyl-D-glutamate--2,6-diaminopimelate ligase	P22188	SINGLE PROTEIN	Escherichia coli (strain K12)	17	17	83333	FALSE
NA	CHEMBL2069158	N-acetyllactosaminide alpha-1,3-galactosyltransferase	P14769	SINGLE PROTEIN	Bos taurus	8	17	9913	FALSE
NA|NA	CHEMBL1907596	Neuronal acetylcholine receptor; alpha4/beta2	P09483|P12390	PROTEIN COMPLEX	Rattus norvegicus	2364	3568	10116	FALSE
NA	CHEMBL311	Glutamate [NMDA] receptor subunit epsilon 2	Q00960	SINGLE PROTEIN	Rattus norvegicus	676	939	10116	FALSE
NANP	CHEMBL2401602	N-acylneuraminate-9-phosphatase	Q8TBE9	SINGLE PROTEIN	Homo sapiens	4	4	9606	FALSE
NA	CHEMBL3351213	Protein O-GlcNAcase	Q8VIJ5	SINGLE PROTEIN	Rattus norvegicus	30	31	10116	FALSE
NA	CHEMBL2331057	Mitogen-activated protein kinase 10	Q61831	SINGLE PROTEIN	Mus musculus	1	1	10090	FALSE
NA	CHEMBL5131	Trypanothione reductase	P28593	SINGLE PROTEIN	Trypanosoma cruzi	560	965	5693	FALSE
NA	CHEMBL1075096	UDP-galactofuranosyl transferase GlfT2	O53585	SINGLE PROTEIN	Mycobacterium tuberculosis	49	50	1773	FALSE
CRBN|ADGRG1	CHEMBL4742327	Cereblon/Adhesion G-protein coupled receptor G1	Q96SW2|Q9Y653	PROTEIN-PROTEIN INTERACTION	Homo sapiens	1	1	9606	FALSE
NA	CHEMBL3611964	Alpha-ketoglutarate-dependent dioxygenase FTO	Q8BGW1	SINGLE PROTEIN	Mus musculus	1	1	10090	FALSE
NA	CHEMBL3227915	Indolethylamine N-methyltransferase	O97972	SINGLE PROTEIN	Oryctolagus cuniculus	82	82	9986	FALSE
GRIN3A	CHEMBL4787	Glutamate [NMDA] receptor subunit 3A	Q8TCU5	SINGLE PROTEIN	Homo sapiens	19	19	9606	FALSE
SLC25A5	CHEMBL3709670	ADP/ATP translocase 2	P05141	SINGLE PROTEIN	Homo sapiens	246	249	9606	FALSE
NA	CHEMBL1075192	Succinyl-diaminopimelate desuccinylase	P44514	SINGLE PROTEIN	Haemophilus influenzae (strain ATCC 51907 / DSM 11121 / KW20 / Rd)	33	53	71421	FALSE
GALNT6	CHEMBL4523400	Polypeptide N-acetylgalactosaminyltransferase 6	Q8NCL4	SINGLE PROTEIN	Homo sapiens	1	1	9606	FALSE
EZH2|EED|SUZ12	CHEMBL3137286	EZH2/SUZ12/EED complex	Q15910|O75530|Q15022	PROTEIN COMPLEX	Homo sapiens	12	20	9606	FALSE
NA|NA|NA|NA|NA|NA|NA|NA|NA|NA|NA	CHEMBL2096669	Glutamate receptors; NMDA/AMPA	P35439|Q00959|Q00960|Q00961|Q62645|Q8VHN2|Q9R1M7|P19491|P19492|P19493|P19490	PROTEIN COMPLEX GROUP	Rattus norvegicus	101	104	10116	FALSE
KMT5A	CHEMBL1795176	N-lysine methyltransferase SETD8	Q9NQR1	SINGLE PROTEIN	Homo sapiens	163	221	9606	FALSE
NA	CHEMBL2331	Phenylethanolamine N-methyltransferase	P10938	SINGLE PROTEIN	Bos taurus	404	752	9913	FALSE
STK24	CHEMBL5082	Serine/threonine-protein kinase 24	Q9Y6E0	SINGLE PROTEIN	Homo sapiens	714	1046	9606	FALSE
DNPH1	CHEMBL3351218	2'-deoxynucleoside 5'-phosphate N-hydrolase 1	O43598	SINGLE PROTEIN	Homo sapiens	25	25	9606	FALSE
HSP90AA1|CDC37	CHEMBL4296080	Heat shock protein HSP 90-alpha/Hsp90 co-chaperone Cdc37	P07900|Q16543	PROTEIN COMPLEX	Homo sapiens	1	1	9606	FALSE
NA	CHEMBL4775	Spermidine/spermine N(1)-acetyltransferase 1	P48026	SINGLE PROTEIN	Mus musculus	11	20	10090	FALSE
NEU1	CHEMBL2726	Sialidase 1	Q99519	SINGLE PROTEIN	Homo sapiens	127	236	9606	FALSE
NA	CHEMBL5291591	Decaprenyl-phosphate N-acetylglucosaminephosphotransferase	A0R211	SINGLE PROTEIN	Mycolicibacterium smegmatis (strain ATCC 700084 / mc(2)155) (Mycobacteriumsmegmatis)	1	1	246196	FALSE
NA	CHEMBL1932892	Lysozyme C	P00698	SINGLE PROTEIN	Gallus gallus	21	158	9031	FALSE
NA	CHEMBL1944500	Trypanothione reductase	A5JV95	SINGLE PROTEIN	Leishmania amazonensis	4	4	5659	FALSE
SETD7	CHEMBL5523	Histone-lysine N-methyltransferase SETD7	Q8WTS6	SINGLE PROTEIN	Homo sapiens	302	405	9606	FALSE
MAPK10|RIPK1	CHEMBL3885602	Mitogen-activated protein kinase 10/Receptor-interacting serine/threonine-protein kinase 1	P53779|Q13546	PROTEIN FAMILY	Homo sapiens	32	33	9606	FALSE
INMT	CHEMBL2131	Indolethylamine N-methyltransferase	O95050	SINGLE PROTEIN	Homo sapiens	71	112	9606	FALSE
NA	CHEMBL4879550	Acyl-[acyl-carrier-protein]--UDP-N-acetylglucosamine O-acyltransferase	P0A722	SINGLE PROTEIN	Escherichia coli	1	1	562	FALSE
MPG	CHEMBL3396943	DNA-3-methyladenine glycosylase	P29372	SINGLE PROTEIN	Homo sapiens	16	29	9606	FALSE
NA	CHEMBL5098	Glutamate carboxypeptidase II	P70627	SINGLE PROTEIN	Rattus norvegicus	59	69	10116	FALSE
NA	CHEMBL4313	Aminoglycoside acetyltransferase	Q70E71	SINGLE PROTEIN	Enterococcus durans	17	17	53345	FALSE
NA	CHEMBL3794	Spermidine/spermine N(1)-acetyltransferase 2	Q6P8J2	SINGLE PROTEIN	Mus musculus	1	1	10090	FALSE
NA	CHEMBL4092	c-Jun N-terminal kinase 3	P49187	SINGLE PROTEIN	Rattus norvegicus	133	144	10116	FALSE
NA	CHEMBL5168	UDP-N-acetylmuramate--L-alanine ligase	P17952	SINGLE PROTEIN	Escherichia coli K-12	45	45	83333	FALSE
VEGFA|NRP2	CHEMBL5482995	NRP2-VEGA	P15692|O60462	PROTEIN COMPLEX	Homo sapiens	2	4	9606	FALSE
NA	CHEMBL5169241	Ribosomal RNA small subunit methyltransferase A	Q9I5U5	SINGLE PROTEIN	Pseudomonas aeruginosa	7	7	287	FALSE
NA	CHEMBL3706556	Nucleoprotein	P15682	SINGLE PROTEIN	Influenza A virus (strain A/Wilson-Smith/1933 H1N1)	2	23	381518	FALSE
NA	CHEMBL5795	Arylamine N-acetyltransferase	Q9HUY3	SINGLE PROTEIN	Pseudomonas aeruginosa (strain ATCC 15692 / PAO1 / 1C / PRS 101 / LMG12228)	17	20	208964	FALSE
FOLH1	CHEMBL1892	Glutamate carboxypeptidase II	Q04609	SINGLE PROTEIN	Homo sapiens	467	734	9606	FALSE
NTMT1	CHEMBL4523442	N-terminal Xaa-Pro-Lys N-methyltransferase 1	Q9BV86	SINGLE PROTEIN	Homo sapiens	123	306	9606	FALSE
PITPNM1	CHEMBL1764937	Membrane-associated phosphatidylinositol transfer protein 1	O00562	SINGLE PROTEIN	Homo sapiens	2	2	9606	FALSE
NA	CHEMBL4319	UDP-N-acetylmuramoylalanine-D-glutamyl-lysine-D-alanyl-D-alanine ligase	Q8DNV6	SINGLE PROTEIN	Streptococcus pneumoniae R6	46	72	171101	FALSE
NAT10	CHEMBL4105935	RNA cytidine acetyltransferase	Q9H0A0	SINGLE PROTEIN	Homo sapiens	246	254	9606	FALSE
NA	CHEMBL1795154	Beta 1,3 N-acetylglucosaminyltransferase	Q8KHG4	SINGLE PROTEIN	Neisseria meningitidis	6	20	487	FALSE
NA	CHEMBL4295549	Voltage-dependent N-type calcium channel subunit alpha	G3X7Z2	SINGLE PROTEIN	Bos taurus	2	2	9913	FALSE
NA	CHEMBL2757	rRNA adenine N-6-methyltransferase	P21236	SINGLE PROTEIN	Streptococcus pneumoniae	34	35	1313	FALSE
FPR1|FPR2	CHEMBL3038479	fMet-Leu-Phe receptor 1/2	P21462|P25090	PROTEIN FAMILY	Homo sapiens	26	66	9606	FALSE
PRDM6	CHEMBL5214858	Putative histone-lysine N-methyltransferase PRDM6	Q9NQX0	SINGLE PROTEIN	Homo sapiens	1	1	9606	FALSE
PRDM7	CHEMBL5214861	Histone-lysine N-methyltransferase PRDM7	Q9NQW5	SINGLE PROTEIN	Homo sapiens	1	1	9606	FALSE
HDAC3|NCOR1	CHEMBL3038484	Histone deacetylase 3/NCoR1	O15379|O75376	PROTEIN COMPLEX	Homo sapiens	84	106	9606	FALSE
USP1	CHEMBL1795087	Ubiquitin carboxyl-terminal hydrolase 1	O94782	SINGLE PROTEIN	Homo sapiens	22317	22556	9606	FALSE
GALNT13	CHEMBL4523392	Polypeptide N-acetylgalactosaminyltransferase 13	Q8IUC8	SINGLE PROTEIN	Homo sapiens	1	1	9606	FALSE
NA	CHEMBL4523437	Histone-lysine N-methyltransferase ASH1L	Q99MY8	SINGLE PROTEIN	Mus musculus	3	11	10090	FALSE
B3GNT3	CHEMBL3325305	N-acetyllactosaminide beta-1,3-N-acetylglucosaminyltransferase 3	Q9Y2A9	SINGLE PROTEIN	Homo sapiens	4	8	9606	FALSE
HNRNPF	CHEMBL4523238	Heterogeneous nuclear ribonucleoprotein F	P52597	SINGLE PROTEIN	Homo sapiens	1	1	9606	FALSE
FPR1	CHEMBL3359	Formyl peptide receptor 1	P21462	SINGLE PROTEIN	Homo sapiens	1014	1453	9606	FALSE
STK4	CHEMBL4598	Serine/threonine-protein kinase MST1	Q13043	SINGLE PROTEIN	Homo sapiens	1626	2689	9606	FALSE
GRIN1|GRIN2D	CHEMBL3038505	Ionotropic glutamate receptor NMDA 1/2D	Q05586|O15399	PROTEIN COMPLEX	Homo sapiens	13	23	9606	FALSE
WDR5|KMT2A|ASH2L|RBBP5	CHEMBL3137282	MLL1/ASH2L/RBBP5/WDR5 complex	P61964|Q03164|Q9UBL3|Q15291	PROTEIN COMPLEX	Homo sapiens	10	16	9606	FALSE
CACNA1B	CHEMBL4478	Voltage-gated N-type calcium channel alpha-1B subunit	Q00975	SINGLE PROTEIN	Homo sapiens	677	820	9606	FALSE
CACNA1H|CACNA2D1|CACNA1C|CACNA2D3|CACNA1S|CACNA2D2|CACNA1D|CACNA1A|CACNA1B|CACNA1G|CACNA2D4|CACNA1I|CACNA1F|CACNA1E|CACNB4|CACNB2|CACNB1|CACNB3|CACNG7|CACNG5|CACNG2|CACNG4|CACNG8|CACNG3|CACNG6|CACNG1	CHEMBL2363032	Voltage-gated calcium channel	O95180|P54289|Q13936|Q8IZS8|Q13698|Q9NY47|Q01668|O00555|Q00975|O43497|Q7Z3S7|Q9P0X4|O60840|Q15878|O00305|Q08289|Q02641|P54284|P62955|Q9UF02|Q9Y698|Q9UBN1|Q8WXS5|O60359|Q9BXT2|Q06432	PROTEIN COMPLEX GROUP	Homo sapiens	129	146	9606	FALSE
NA	CHEMBL4523449	Protein O-GlcNAcase	Q9EQQ9	SINGLE PROTEIN	Mus musculus	3	3	10090	FALSE
PRMT3	CHEMBL5891	Protein arginine N-methyltransferase 3	O60678	SINGLE PROTEIN	Homo sapiens	179	240	9606	FALSE
SAE1|UBA2|UBE2I	CHEMBL3137290	SUMO E1/E2	Q9UBE0|Q9UBT2|P63279	PROTEIN COMPLEX	Homo sapiens	112	116	9606	FALSE
GSTA1	CHEMBL3409	Glutathione S-transferase A1	P08263	SINGLE PROTEIN	Homo sapiens	81	122	9606	FALSE
ABO	CHEMBL2321639	Histo-blood group ABO system transferase	P16442	SINGLE PROTEIN	Homo sapiens	4	13	9606	FALSE
AMDHD2	CHEMBL3217376	Putative N-acetylglucosamine-6-phosphate deacetylase	Q9Y303	SINGLE PROTEIN	Homo sapiens	1	1	9606	FALSE
CARM1	CHEMBL5406	Histone-arginine methyltransferase CARM1	Q86X55	SINGLE PROTEIN	Homo sapiens	386	618	9606	FALSE
LRRC59	CHEMBL2216743	Leucine-rich repeat-containing protein 59	Q96AG4	SINGLE PROTEIN	Homo sapiens	2	3	9606	FALSE
GBA1|GBA2	CHEMBL4106172	Glucocerebrosidase GBA1/GBA2	P04062|Q9HCG7	PROTEIN FAMILY	Homo sapiens	2	3	9606	FALSE
NA|NA	CHEMBL2096666	Glutamate NMDA receptor; Grin1/Grin2b	P35439|Q00960	PROTEIN COMPLEX	Rattus norvegicus	797	1028	10116	FALSE
NA	CHEMBL2321638	Poly [ADP-ribose] polymerase 1	Q9R152	SINGLE PROTEIN	Cricetulus griseus	3	8	10029	FALSE
PNMT	CHEMBL4617	Phenylethanolamine N-methyltransferase	P11086	SINGLE PROTEIN	Homo sapiens	291	541	9606	FALSE
KMT2E	CHEMBL4523393	Inactive histone-lysine N-methyltransferase 2E	Q8IZD2	SINGLE PROTEIN	Homo sapiens	1	1	9606	FALSE
CARM1|VHL	CHEMBL5465233	VHL/Histone-arginine methyltransferase CARM1	Q86X55|P40337	PROTEIN-PROTEIN INTERACTION	Homo sapiens	7	19	9606	FALSE
MAPK8	CHEMBL2276	c-Jun N-terminal kinase 1	P45983	SINGLE PROTEIN	Homo sapiens	4206	5378	9606	FALSE
GRIN1|GRIN2B	CHEMBL1907603	Glutamate NMDA receptor; GRIN1/GRIN2B	Q05586|Q13224	PROTEIN COMPLEX	Homo sapiens	520	775	9606	FALSE
NA	CHEMBL4630870	DNA repair protein RecN	P05824	SINGLE PROTEIN	Escherichia coli	10	10	562	FALSE
NA	CHEMBL1944501	Trypanothione reductase	A4HSF7	SINGLE PROTEIN	Leishmania infantum	129	267	5671	FALSE
NA	CHEMBL330	Glutamate (NMDA) receptor subunit zeta 1	P35439	SINGLE PROTEIN	Rattus norvegicus	1959	2167	10116	FALSE
NA	CHEMBL6081	N(G),N(G)-dimethylarginine dimethylaminohydrolase 1	P56965	SINGLE PROTEIN	Bos taurus	1	3	9913	FALSE
NA	CHEMBL2366280	KP-N-YN	NA	CELL-LINE	Homo sapiens	96	96	9606	FALSE
NA	CHEMBL4196	Dimethylarginine dimethylaminohydrolase 1	O08557	SINGLE PROTEIN	Rattus norvegicus	3	7	10116	FALSE
NA|NA	CHEMBL2096680	Glutamate NMDA receptor; Grin1/Grin2a	P35439|Q00959	PROTEIN COMPLEX	Rattus norvegicus	653	798	10116	FALSE
NCOR2	CHEMBL5949	Nuclear receptor corepressor 2	Q9Y618	SINGLE PROTEIN	Homo sapiens	3	3	9606	FALSE
WDR5|KMT2A	CHEMBL3883320	Histone-lysine N-methyltransferase 2A/WDR5	P61964|Q03164	PROTEIN-PROTEIN INTERACTION	Homo sapiens	77	102	9606	FALSE
HHAT	CHEMBL4296243	Protein-cysteine N-palmitoyltransferase HHAT	Q5VTY9	SINGLE PROTEIN	Homo sapiens	59	159	9606	FALSE
NA	CHEMBL3259464	Arylamine N-acetyltransferase 2	P50293	SINGLE PROTEIN	Mesocricetus auratus	1	1	10036	FALSE
WDR5|KMT2A|ASH2L|RBBP5|DPY30	CHEMBL4106124	MLL1-ASH2L/RbBP5/WDR5/DPY30	P61964|Q03164|Q9UBL3|Q15291|Q9C005	PROTEIN-PROTEIN INTERACTION	Homo sapiens	42	42	9606	FALSE
NSF	CHEMBL2311231	Vesicle-fusing ATPase	P46459	SINGLE PROTEIN	Homo sapiens	5	5	9606	FALSE
NA	CHEMBL3937	Bovine viral diarrhoea virus polyprotein	Q96662	SINGLE PROTEIN	Bovine viral diarrhea virus (strain CP7) (BVDV) (Mucosal diseasevirus)	2	2	268305	FALSE
NA	CHEMBL614924	SK-N-SH	NA	CELL-LINE	Homo sapiens	958	1514	9606	FALSE
NA	CHEMBL5484	Glycylpeptide N-tetradecanoyltransferase	P14743	SINGLE PROTEIN	Saccharomyces cerevisiae S288c	3	44	559292	FALSE
PLA2G4E	CHEMBL3831242	Cytosolic phospholipase A2 epsilon	Q3MJ16	SINGLE PROTEIN	Homo sapiens	1	1	9606	FALSE
NA	CHEMBL3638362	CMP-N-acetylneuraminate-beta-galactosamide-alpha-2,3-sialyltransferase 2	Q11205	SINGLE PROTEIN	Rattus norvegicus	16	16	10116	FALSE
NA	CHEMBL5724	Arylamine N-acetyltransferase 2	P50295	SINGLE PROTEIN	Mus musculus	68	71	10090	FALSE
NAT2	CHEMBL2194	Arylamine N-acetyltransferase 2	P11245	SINGLE PROTEIN	Homo sapiens	3	3	9606	FALSE
XNDC1N	CHEMBL3721310	Putative short transient receptor potential channel 2-like protein	Q6ZNB5	SINGLE PROTEIN	Homo sapiens	1	1	9606	FALSE
RPA1	CHEMBL1764940	Replication protein A 70 kDa DNA-binding subunit	P27694	SINGLE PROTEIN	Homo sapiens	151	185	9606	FALSE
NA	CHEMBL3637936	Voltage-dependent N-type calcium channel subunit alpha-1B	O55017	SINGLE PROTEIN	Mus musculus	1	1	10090	FALSE
GSDMD	CHEMBL4523247	Gasdermin-D	P57764	SINGLE PROTEIN	Homo sapiens	6	6	9606	FALSE
NA	CHEMBL1075211	UDP-N-acetylmuramoyl-tripeptide--D-alanyl-D-alanine ligase	Q9EY48	SINGLE PROTEIN	Pseudomonas aeruginosa	11	22	287	FALSE
FUT9	CHEMBL4985	Fucosyltransferase 9	Q9Y231	SINGLE PROTEIN	Homo sapiens	13	24	9606	FALSE
STK3	CHEMBL4708	Serine/threonine-protein kinase MST2	Q13188	SINGLE PROTEIN	Homo sapiens	2217	3144	9606	FALSE
NA	CHEMBL4623	UDP-N-acetylmuramate--L-alanine ligase	O31211	SINGLE PROTEIN	Staphylococcus aureus	25	25	1280	FALSE
NA	CHEMBL4841	UDP-N-acetylmuramoylalanine-D-glutamate ligase	P0A091	SINGLE PROTEIN	Staphylococcus aureus	26	26	1280	FALSE
NA	CHEMBL1795141	Chitinase-3-like protein 3	O35744	SINGLE PROTEIN	Mus musculus	2	4	10090	FALSE
NA	CHEMBL1667674	Beta-hexosaminidase	Q9HZK0	SINGLE PROTEIN	Pseudomonas aeruginosa (strain ATCC 15692 / PAO1 / 1C / PRS 101 / LMG12228)	6	11	208964	FALSE
NA|NA|NA|NA|NA|NA|NA|NA|NA|NA|NA	CHEMBL2094110	Neuronal acetylcholine receptor	P04757|P09483|P12389|P12390|P12392|P43144|Q9JLB5|P12391|P43143|P20420|Q05941	PROTEIN COMPLEX GROUP	Rattus norvegicus	456	756	10116	FALSE
NAA60	CHEMBL4630856	N-alpha-acetyltransferase 60	Q9H7X0	SINGLE PROTEIN	Homo sapiens	2	2	9606	FALSE
NA	CHEMBL5154	Trypanothione reductase	Q389T8	SINGLE PROTEIN	Trypanosoma brucei brucei (strain 927/4 GUTat10.1)	19	19	999953	FALSE
NA	CHEMBL4984	TNF-alpha	P06804	SINGLE PROTEIN	Mus musculus	48	82	10090	FALSE
NA	CHEMBL3001	Neuronal acetylcholine receptor protein beta-2 subunit	P12390	SINGLE PROTEIN	Rattus norvegicus	1	1	10116	FALSE
ALDH9A1	CHEMBL2542	Aldehyde dehydrogenase 9A1	P49189	SINGLE PROTEIN	Homo sapiens	2	4	9606	FALSE
NA|NA	CHEMBL2095183	Shiga toxin	Q7WZI6|Q7WZI7	PROTEIN COMPLEX	Escherichia coli O157:H7	417	517	83334	FALSE
NA	CHEMBL3721301	N-terminal kinase-like protein	Q9EQC5	SINGLE PROTEIN	Mus musculus	13	54	10090	FALSE
NA	CHEMBL2163170	UDP-3-O-acyl-N-acetylglucosamine deacetylase	B5ATN6	SINGLE PROTEIN	Pseudomonas aeruginosa	32	32	287	FALSE
NA	CHEMBL3408	Polyamine oxidase	Q8C0L6	SINGLE PROTEIN	Mus musculus	5	16	10090	FALSE
NLRP1	CHEMBL1741214	NACHT, LRR and PYD domains-containing protein 1	Q9C000	SINGLE PROTEIN	Homo sapiens	41	41	9606	FALSE
EZH1	CHEMBL2189116	Histone-lysine N-methyltransferase EZH1	Q92800	SINGLE PROTEIN	Homo sapiens	103	123	9606	FALSE
NAGLU	CHEMBL5465292	Alpha-N-acetylglucosaminidase	P54802	SINGLE PROTEIN	Homo sapiens	4	12	9606	FALSE
NAA10	CHEMBL4630819	N-alpha-acetyltransferase 10	P41227	SINGLE PROTEIN	Homo sapiens	2	2	9606	FALSE
NA	CHEMBL3774296	Neural Wiskott-Aldrich syndrome protein	O08816	SINGLE PROTEIN	Rattus norvegicus	2	2	10116	FALSE
PRMT5|VHL	CHEMBL4748215	VHL/Protein arginine N-methyltransferase 5	O14744|P40337	PROTEIN-PROTEIN INTERACTION	Homo sapiens	9	24	9606	FALSE
NA	CHEMBL4664	Poly [ADP-ribose] polymerase 1	P27008	SINGLE PROTEIN	Rattus norvegicus	64	88	10116	FALSE
NA|NA	CHEMBL2111376	Spermidine/spermine N(1)-acetyltransferase (SAT)	Q6P8J2|P48026	PROTEIN FAMILY	Mus musculus	52	56	10090	FALSE
FUT6	CHEMBL4443	Fucosyltransferase 6	P51993	SINGLE PROTEIN	Homo sapiens	14	19	9606	FALSE
NA	CHEMBL2942	N-acetyllactosaminide alpha-1,3-galactosyltransferase	P50127	SINGLE PROTEIN	Sus scrofa	11	11	9823	FALSE
SMPD2	CHEMBL4712	Neutral sphingomyelinase	O60906	SINGLE PROTEIN	Homo sapiens	28	40	9606	FALSE
NA	CHEMBL3855	UDP-3-O-acyl-GlcNAc deacetylase	P47205	SINGLE PROTEIN	Pseudomonas aeruginosa (strain ATCC 15692 / PAO1 / 1C / PRS 101 / LMG12228)	651	700	208964	FALSE
NA	CHEMBL1795174	Mitogen-activated protein kinase 8	Q91Y86	SINGLE PROTEIN	Mus musculus	25	28	10090	FALSE
NA|NA	CHEMBL3885603	Mitogen-activated protein kinase 9/10	Q9WTU6|Q61831	PROTEIN FAMILY	Mus musculus	1	2	10090	FALSE
EZH2|EED|SUZ12|RBBP4|RBBP7	CHEMBL3301388	EZH2/SUZ12/EED/RBBP7/RBBP4	Q15910|O75530|Q15022|Q09028|Q16576	PROTEIN COMPLEX	Homo sapiens	7	11	9606	FALSE
NA	CHEMBL1255164	Probable protein-cysteine N-palmitoyltransferase porcupine	Q9JJJ7	SINGLE PROTEIN	Mus musculus	157	165	10090	FALSE
B3GNT6	CHEMBL2321631	UDP-GlcNAc:betaGal beta-1,3-N-acetylglucosaminyltransferase 6	Q6ZMB0	SINGLE PROTEIN	Homo sapiens	3	3	9606	FALSE
NA	CHEMBL4802009	Sialyltransferase ST3Gal-I	Q6H8N0	SINGLE PROTEIN	Rattus norvegicus	19	24	10116	FALSE
NA	CHEMBL1075035	Beta-hexosaminidase	Q9KU37	SINGLE PROTEIN	Vibrio cholerae serotype O1 (strain ATCC 39315 / El Tor Inaba N16961)	11	11	243277	FALSE
PAOX	CHEMBL2105	Polyamine oxidase	Q6QHF9	SINGLE PROTEIN	Homo sapiens	51	84	9606	FALSE
ANPEP	CHEMBL1907	Aminopeptidase N	P15144	SINGLE PROTEIN	Homo sapiens	701	863	9606	FALSE
NA	CHEMBL4276	CMP-N-acetylneuraminate-beta-galactosamide-alpha-2,6-sialyltransferase	P13721	SINGLE PROTEIN	Rattus norvegicus	30	61	10116	FALSE
FUT5	CHEMBL3146	Fucosyltransferase 5	Q11128	SINGLE PROTEIN	Homo sapiens	10	13	9606	FALSE
NA|NA	CHEMBL3038501	JNK1/JNK2	Q91Y86|Q9WTU6	PROTEIN FAMILY	Mus musculus	3	6	10090	FALSE
HDAC3|NCOR2	CHEMBL2111363	Histone deacetylase 3/Nuclear receptor corepressor 2 (HDAC3/NCoR2)	O15379|Q9Y618	PROTEIN COMPLEX	Homo sapiens	570	765	9606	FALSE
NA	CHEMBL614163	SK-N-MC	NA	CELL-LINE	Homo sapiens	420	815	9606	FALSE
NA	CHEMBL5718	Mitogen-activated protein kinase 8	P49185	SINGLE PROTEIN	Rattus norvegicus	26	32	10116	FALSE
HSP90AB1|CDC37	CHEMBL4296081	Heat shock protein HSP 90-beta/Hsp90 co-chaperone Cdc37	P08238|Q16543	PROTEIN COMPLEX	Homo sapiens	55	85	9606	FALSE
HRAS	CHEMBL2167	Transforming protein p21/H-Ras-1	P01112	SINGLE PROTEIN	Homo sapiens	108	139	9606	FALSE
NA	CHEMBL2278	Beta-glucocerebrosidase	P17439	SINGLE PROTEIN	Mus musculus	36	36	10090	FALSE
EZH2|CRBN	CHEMBL5169086	CRBN/EZH2	Q15910|Q96SW2	PROTEIN-PROTEIN INTERACTION	Homo sapiens	4	7	9606	FALSE
NA	CHEMBL3879870	N-acetyltransferase Eis	P9WFK7	SINGLE PROTEIN	Mycobacterium tuberculosis (strain ATCC 25618 / H37Rv)	106	117	83332	FALSE
NA	CHEMBL1075466	HO-1-N-1	NA	CELL-LINE	Homo sapiens	98	99	9606	FALSE
DPAGT1	CHEMBL4739704	UDP-N-acetylglucosamine--dolichyl-phosphate N-acetylglucosaminephosphotransferase	Q9H3H5	SINGLE PROTEIN	Homo sapiens	11	17	9606	FALSE
NAA50	CHEMBL4630854	N-alpha-acetyltransferase 50	Q9GZZ1	SINGLE PROTEIN	Homo sapiens	22	57	9606	FALSE
NA	CHEMBL2010632	Aminopeptidase N	P79098	SINGLE PROTEIN	Bos taurus	1	1	9913	FALSE
NA	CHEMBL2366120	SK-N-FI	NA	CELL-LINE	Homo sapiens	162	180	9606	FALSE
NA	CHEMBL4295617	Peptidoglycan-N-acetylglucosamine deacetylase	Q8DP63	SINGLE PROTEIN	Streptococcus pneumoniae (strain ATCC BAA-255 / R6)	15	31	171101	FALSE
NA|NA|NA|NA|NA|NA|NA	CHEMBL1907608	Glutamate NMDA receptor	P35439|Q00959|Q00960|Q00961|Q62645|Q8VHN2|Q9R1M7	PROTEIN COMPLEX GROUP	Rattus norvegicus	3910	6489	10116	FALSE
NA	CHEMBL1075077	Translation initiation factor IF-3	P0A707	SINGLE PROTEIN	Escherichia coli K-12	1	2	83333	FALSE
NSD3	CHEMBL3108646	Histone-lysine N-methyltransferase NSD3	Q9BZ95	SINGLE PROTEIN	Homo sapiens	105	172	9606	FALSE
ALKBH1	CHEMBL5169151	Nucleic acid dioxygenase ALKBH1	Q13686	SINGLE PROTEIN	Homo sapiens	1	2	9606	FALSE
EHMT1|EHMT2	CHEMBL3885593	Histone-lysine N-methyltransferase EHMT1/EHMT2	Q9H9B1|Q96KQ7	PROTEIN FAMILY	Homo sapiens	7	8	9606	FALSE
PRMT9	CHEMBL4105724	Protein arginine N-methyltransferase 9	Q6P2P2	SINGLE PROTEIN	Homo sapiens	31	57	9606	FALSE
NA	CHEMBL2297	Lysozyme C	P00697	SINGLE PROTEIN	Rattus norvegicus	11	11	10116	FALSE
NA	CHEMBL1770037	fMet-Leu-Phe receptor	P33766	SINGLE PROTEIN	Mus musculus	6	7	10090	FALSE
NA	CHEMBL4359	UDP-N-acetylmuramoylalanine--D-glutamate ligase	Q97RU8	SINGLE PROTEIN	Streptococcus pneumoniae serotype 4 (strain ATCC BAA-334 / TIGR4)	1	1	170187	FALSE
GALNT14	CHEMBL4523427	Polypeptide N-acetylgalactosaminyltransferase 14	Q96FL9	SINGLE PROTEIN	Homo sapiens	1	1	9606	FALSE
PRMT5|WDR77	CHEMBL3137261	PRMT5/MEP50 complex	O14744|Q9BQA1	PROTEIN COMPLEX	Homo sapiens	1034	1125	9606	FALSE
NSD2|VHL	CHEMBL5169064	VHL/NSD2	O96028|P40337	PROTEIN-PROTEIN INTERACTION	Homo sapiens	4	7	9606	FALSE
NA	CHEMBL4105798	UDP-N-acetylbacillosamine N-acetyltransferase	Q0P9D1	SINGLE PROTEIN	Campylobacter jejuni subsp. jejuni serotype O:2 (strain ATCC 700819 /NCTC 11168)	43	87	192222	FALSE
MECOM	CHEMBL5214865	Histone-lysine N-methyltransferase MECOM	Q03112	SINGLE PROTEIN	Homo sapiens	1	1	9606	FALSE
NA	CHEMBL1075242	Serotonin N-acetyltransferase	Q64666	SINGLE PROTEIN	Rattus norvegicus	1	4	10116	FALSE
PDE6D|KRAS	CHEMBL4523623	PDE6D/KRAS	O43924|P01116	PROTEIN-PROTEIN INTERACTION	Homo sapiens	7	21	9606	FALSE
GALNT1	CHEMBL4523282	Polypeptide N-acetylgalactosaminyltransferase 1	Q10472	SINGLE PROTEIN	Homo sapiens	1	1	9606	FALSE
GALNT2	CHEMBL3713355	Polypeptide N-acetylgalactosaminyltransferase 2	Q10471	SINGLE PROTEIN	Homo sapiens	8	34	9606	FALSE
TP53|RPA1	CHEMBL3885545	Cellular tumor antigen p53/Replication protein A 70 kDa DNA-binding subunit	P04637|P27694	PROTEIN-PROTEIN INTERACTION	Homo sapiens	1	1	9606	FALSE
FPR3	CHEMBL5646	N-formyl peptide receptor 3	P25089	SINGLE PROTEIN	Homo sapiens	548	561	9606	FALSE
POMGNT1	CHEMBL2321629	Protein O-linked-mannose beta-1,2-N-acetylglucosaminyltransferase 1	Q8WZA1	SINGLE PROTEIN	Homo sapiens	3	3	9606	FALSE
NA	CHEMBL3751651	Eukaryotic initiation factor 4A-III	Q91VC3	SINGLE PROTEIN	Mus musculus	2	2	10090	FALSE
NA	CHEMBL4523942	Amyloid-beta A4 protein	P12023	SINGLE PROTEIN	Mus musculus	2	5	10090	FALSE
NA	CHEMBL4296494	SK-N-BE(2)-M17	NA	CELL-LINE	Homo sapiens	35	195	9606	FALSE
NT5C3B	CHEMBL4295921	7-methylguanosine phosphate-specific 5'-nucleotidase	Q969T7	SINGLE PROTEIN	Homo sapiens	5	28	9606	FALSE
NA	CHEMBL1255153	Protein-cysteine N-palmitoyltransferase HHAT	Q8BMT9	SINGLE PROTEIN	Mus musculus	1	1	10090	FALSE
NAPEPLD	CHEMBL4630839	N-acyl-phosphatidylethanolamine-hydrolyzing phospholipase D	Q6IQ20	SINGLE PROTEIN	Homo sapiens	114	115	9606	FALSE
NA	CHEMBL2201	Dual specificity mitogen-activated protein kinase kinase 4	P47809	SINGLE PROTEIN	Mus musculus	95	99	10090	FALSE
NA|NA	CHEMBL1907592	Neuronal acetylcholine receptor; alpha2/beta2	P12389|P12390	PROTEIN COMPLEX	Rattus norvegicus	174	207	10116	FALSE
HNMT	CHEMBL2190	Histamine N-methyltransferase	P50135	SINGLE PROTEIN	Homo sapiens	10	15	9606	FALSE
NA	CHEMBL4295563	rRNA adenine N-6-methyltransferase	P02979	SINGLE PROTEIN	Staphylococcus aureus	1	1	1280	FALSE
NA	CHEMBL1770035	Phospho-N-acetylmuramoyl-pentapeptide-transferase	P0C1R8	SINGLE PROTEIN	Staphylococcus aureus	73	78	1280	FALSE
EZH2|VHL	CHEMBL5169073	VHL/EZH2	Q15910|P40337	PROTEIN-PROTEIN INTERACTION	Homo sapiens	1	3	9606	FALSE
FGFR1	CHEMBL3650	Fibroblast growth factor receptor 1	P11362	SINGLE PROTEIN	Homo sapiens	6364	9272	9606	FALSE
NA|NA	CHEMBL3885583	Glutamate receptor ionotropic, NMDA 1/NMDA 2B	P35438|Q01097	PROTEIN COMPLEX	Mus musculus	1	2	10090	FALSE
NA	CHEMBL5169223	Nucleoprotein	P0DTC9	SINGLE PROTEIN	Severe acute respiratory syndrome coronavirus 2	2	2	2697049	FALSE
H4C1	CHEMBL5876	Histone H4	P62805	SINGLE PROTEIN	Homo sapiens	67	68	9606	FALSE
NA	CHEMBL1075083	Cytosolic endo-beta-N-acetylglucosaminidase	P0C7A1	SINGLE PROTEIN	Gallus gallus	8	8	9031	FALSE
NA	CHEMBL4523932	tRNA (guanine-N(1)-)-methyltransferase	Q9HXQ1	SINGLE PROTEIN	Pseudomonas aeruginosa (strain ATCC 15692 / DSM 22644 / CIP 104116 / JCM14847 / LMG 12228 / 1C / PRS 101 / PAO1)	35	63	208964	FALSE
NA	CHEMBL4523385	Dual specificity mitogen-activated protein kinase kinase 7	Q8CE90	SINGLE PROTEIN	Mus musculus	2	4	10090	FALSE
NA	CHEMBL3148	Gamma-amino-N-butyrate transaminase	P50554	SINGLE PROTEIN	Rattus norvegicus	67	95	10116	FALSE
CRBN|DDB1|CUL4A|RBX1	CHEMBL3833061	CRL4(CRBN) E3 ubiquitin ligase	Q96SW2|Q16531|Q13619|P62877	PROTEIN COMPLEX	Homo sapiens	NA	NA	9606	FALSE
NA	CHEMBL4523583	RNA-directed RNA polymerase L	P31352	SINGLE PROTEIN	Lake Victoria marburgvirus (strain Musoke-80) (MARV) (Marburg virus (strainKenya/Musoke/1980))	NA	NA	33727	FALSE
MYCN	CHEMBL4523165	N-myc proto-oncogene protein	P04198	SINGLE PROTEIN	Homo sapiens	33	36	9606	FALSE
NA	CHEMBL4523436	N-acylneuraminate cytidylyltransferase	Q99KK2	SINGLE PROTEIN	Mus musculus	4	4	10090	FALSE
NA	CHEMBL3988596	Glycylpeptide N-tetradecanoyltransferase	Q388H8	SINGLE PROTEIN	Trypanosoma brucei brucei (strain 927/4 GUTat10.1)	504	506	185431	FALSE
NA|NA|NA|NA|NA|NA|NA|NA|NA|NA|NA|NA	CHEMBL2364696	Envelope glycoprotein	P10211|P10228|Q69091|P04488|P06484|P06477|P06487|P06480|P68331|P10185|P04288|O09800	PROTEIN FAMILY	Human herpesvirus 1	NA	NA	10298	FALSE
SOS1|KRAS	CHEMBL5465393	SOS1-KRAS	Q07889|P01116	PROTEIN COMPLEX	Homo sapiens	85	121	9606	FALSE
NA	CHEMBL2169720	Histone-lysine N-methyltransferase Su(var)3-9	P45975	SINGLE PROTEIN	Drosophila melanogaster	1	16	7227	FALSE
SETD2	CHEMBL3108647	Histone-lysine N-methyltransferase SETD2	Q9BYW2	SINGLE PROTEIN	Homo sapiens	96	132	9606	FALSE
ARSB	CHEMBL2399	N-acetylgalactosamine-4-sulfatase	P15848	SINGLE PROTEIN	Homo sapiens	1	1	9606	FALSE
NA	CHEMBL4296297	UDP-3-O-acyl-N-acetylglucosamine deacetylase	C6ARS9	SINGLE PROTEIN	Rhizobium leguminosarum bv. trifolii (strain WSM1325)	3	12	395491	FALSE
NA	CHEMBL2169719	Histone-lysine N-methyltransferase E(z)	P42124	SINGLE PROTEIN	Drosophila melanogaster	1	2	7227	FALSE
HDAC1|NCOR2	CHEMBL3885590	Histone deacetylase 1/Nuclear receptor corepressor 2	Q13547|Q9Y618	PROTEIN COMPLEX	Homo sapiens	6	6	9606	FALSE
NA	CHEMBL3548	Peptide N-myristoyltransferase 1	P30418	SINGLE PROTEIN	Candida albicans (strain SC5314 / ATCC MYA-2876) (Yeast)	115	193	237561	FALSE
NA	CHEMBL4310	Serine/threonine-protein kinase MST2	Q9JI10	SINGLE PROTEIN	Mus musculus	20	20	10090	FALSE
AGRN	CHEMBL4295648	Agrin	O00468	SINGLE PROTEIN	Homo sapiens	1	1	9606	FALSE
HNRNPH2	CHEMBL4296005	Heterogeneous nuclear ribonucleoprotein H2	P55795	SINGLE PROTEIN	Homo sapiens	1	2	9606	FALSE
NA	CHEMBL2198	Alpha-N-acetylgalactosaminide alpha-2,6-sialyltransferase III	Q64686	SINGLE PROTEIN	Rattus norvegicus	2	2	10116	FALSE
NA	CHEMBL1250362	Huntingtin	P42859	SINGLE PROTEIN	Mus musculus	3	8	10090	FALSE
GRIN2D	CHEMBL2591	Glutamate [NMDA] receptor subunit epsilon 4	O15399	SINGLE PROTEIN	Homo sapiens	24	29	9606	FALSE
MEN1|KMT2A	CHEMBL2093861	Menin/Histone-lysine N-methyltransferase MLL	O00255|Q03164	PROTEIN-PROTEIN INTERACTION	Homo sapiens	44370	48161	9606	FALSE
NA	CHEMBL4541	UDP-N-acetylglucosamine 1-carboxyvinyltransferase 1	P84058	SINGLE PROTEIN	Staphylococcus aureus subsp. aureus N315	2	6	158879	FALSE
VHL|NTMT1	CHEMBL5291694	VHL/NTMT1	P40337|Q9BV86	PROTEIN-PROTEIN INTERACTION	Homo sapiens	4	25	9606	FALSE
FPR2	CHEMBL4227	Lipoxin A4 receptor	P25090	SINGLE PROTEIN	Homo sapiens	1471	3499	9606	FALSE
NAA40	CHEMBL4523373	N-alpha-acetyltransferase 40	Q86UY6	SINGLE PROTEIN	Homo sapiens	12	38	9606	FALSE
NA	CHEMBL3641	UDP-N-acetylmuramoyl-tripeptide--D-alanyl-D-alanine ligase	Q5HMD9	SINGLE PROTEIN	Staphylococcus epidermidis (strain ATCC 35984 / RP62A)	21	21	176279	FALSE
NA	CHEMBL5394	Trypanothione reductase	P39040	SINGLE PROTEIN	Crithidia fasciculata	2	4	5656	FALSE
NA	CHEMBL5723	Arylamine N-acetyltransferase 1	P50294	SINGLE PROTEIN	Mus musculus	1	1	10090	FALSE
UBE2N	CHEMBL6089	Ubiquitin-conjugating enzyme E2 N	P61088	SINGLE PROTEIN	Homo sapiens	1216	1570	9606	FALSE
NA	CHEMBL6060	Arylamine N-acetyltransferase	O86309	SINGLE PROTEIN	Mycobacterium smegmatis	3	5	1772	FALSE
NA	CHEMBL3559642	Phospho-N-acetylmuramoyl-pentapeptide-transferase	E2QF15	SINGLE PROTEIN	Escherichia coli	23	27	562	FALSE
NA	CHEMBL1075052	Beta-hexosaminidase subunit alpha	Q0V8R6	SINGLE PROTEIN	Bos taurus	1	1	9913	FALSE
GRIN2C	CHEMBL4109	Glutamate [NMDA] receptor subunit epsilon 3	Q14957	SINGLE PROTEIN	Homo sapiens	47	50	9606	FALSE
UBR4	CHEMBL4295851	E3 ubiquitin-protein ligase UBR4	Q5T4S7	SINGLE PROTEIN	Homo sapiens	1	2	9606	FALSE
KMT2A	CHEMBL1293299	Histone-lysine N-methyltransferase MLL	Q03164	SINGLE PROTEIN	Homo sapiens	17301	17348	9606	FALSE
NA|NA	CHEMBL4106155	Ionotropic glutamate receptor NMDA1/2B	P35439|Q01097	PROTEIN COMPLEX	Rattus norvegicus	1	1	10116	FALSE
NA	CHEMBL4295542	L-ornithine N(5)-monooxygenase	E9QYP0	SINGLE PROTEIN	Neosartorya fumigata (strain ATCC MYA-4609 / Af293 / CBS 101355 / FGSCA1100) (Aspergillus fumigatus)	1	2	330879	FALSE
UBE2V1|UBE2N	CHEMBL3883289	Ubiquitin-conjugating enzyme E2 N/Ubiquitin-conjugating enzyme E2 variant 1	Q13404|P61088	PROTEIN-PROTEIN INTERACTION	Homo sapiens	10	12	9606	FALSE
NA	CHEMBL3259	Aminopeptidase N	P15684	SINGLE PROTEIN	Rattus norvegicus	61	61	10116	FALSE
NA	CHEMBL1293245	Ion channel NompC	Q7T1G6	SINGLE PROTEIN	Danio rerio	265	277	7955	FALSE
NCOR2|BCL6	CHEMBL4523673	BCL-6/NCOR2	Q9Y618|P41182	PROTEIN-PROTEIN INTERACTION	Homo sapiens	37	49	9606	FALSE
NA|NA	CHEMBL3883327	Menin/Histone-lysine N-methyltransferase 2A	O88559|P55200	PROTEIN-PROTEIN INTERACTION	Mus musculus	1	6	10090	FALSE
NA	CHEMBL5169138	Actin, cytoplasmic 1	P60710	SINGLE PROTEIN	Mus musculus	1	2	10090	FALSE
NA	CHEMBL1949487	Bifunctional protein GlmU	Q97R46	SINGLE PROTEIN	Streptococcus pneumoniae serotype 4 (strain ATCC BAA-334 / TIGR4)	38	38	170187	FALSE
NA|NA|NA	CHEMBL3137276	Nicotinic acetylcholine receptor alpha6/alpha3/beta4	P04757|P12392|P43143	PROTEIN COMPLEX	Rattus norvegicus	165	333	10116	FALSE
GALNT3	CHEMBL4523291	Polypeptide N-acetylgalactosaminyltransferase 3	Q14435	SINGLE PROTEIN	Homo sapiens	1	1	9606	FALSE
NA	CHEMBL1949483	Glycylpeptide N-tetradecanoyltransferase	Q4Q5S8	SINGLE PROTEIN	Leishmania major	80	109	5664	FALSE
NOS1|NOS2|NOS3	CHEMBL4630725	Nitric oxide synthase	P29475|P35228|P29474	PROTEIN FAMILY	Homo sapiens	NA	NA	9606	FALSE
NA	CHEMBL4295582	Poly-beta-1,6-N-acetyl-D-glucosamine N-deacetylase	P75906	SINGLE PROTEIN	Escherichia coli (strain K12)	13	23	83333	FALSE
SLC25A6	CHEMBL4105854	ADP/ATP translocase 3	P12236	SINGLE PROTEIN	Homo sapiens	241	241	9606	FALSE
PRDM2	CHEMBL5214862	PR domain zinc finger protein 2	Q13029	SINGLE PROTEIN	Homo sapiens	1	1	9606	FALSE
NA	CHEMBL4739842	Formyl peptide receptor 2	O88536	SINGLE PROTEIN	Mus musculus	6	9	10090	FALSE
PPARG|NCOR2	CHEMBL2096976	Peroxisome proliferator-activated receptor gamma/Nuclear receptor corepressor 2	P37231|Q9Y618	PROTEIN-PROTEIN INTERACTION	Homo sapiens	239	239	9606	FALSE
NA	CHEMBL3596078	UDP-N-acetylglucosamine--N-acetylmuramyl-(pentapeptide) pyrophosphoryl-undecaprenol N-acetylglucosamine transferase	P17443	SINGLE PROTEIN	Escherichia coli (strain K12)	10	12	83333	FALSE
DIO1|DIO2|DIO3	CHEMBL3542431	Deiodinase	P49895|Q92813|P55073	PROTEIN FAMILY	Homo sapiens	NA	NA	9606	FALSE
ALDH5A1|ALDH2|ALDH9A1|ALDH3B2|ALDH1A1|ALDH3A1|ALDH1A3|ALDH3B1|ALDH1B1|ALDH1A2|ALDH4A1	CHEMBL3542434	Aldehyde dehydrogenase	P51649|P05091|P49189|P48448|P00352|P30838|P47895|P43353|P30837|O94788|P30038	PROTEIN FAMILY	Homo sapiens	NA	NA	9606	FALSE
ANPEP|NPEPPS|RNPEP|METAP1|LNPEP|DNPEP|ENPEP|XPNPEP1|LAP3|METAP2|XPNPEP2|ERAP2|ERAP1|LVRN|AOPEP|METAP1D|NPEPL1|RNPEPL1|XPNPEP3	CHEMBL3831223	Aminopeptidase	P15144|P55786|Q9H4A4|P53582|Q9UIQ6|Q9ULA0|Q07075|Q9NQW7|P28838|P50579|O43895|Q6P179|Q9NZ08|Q6Q4G3|Q8N6M6|Q6UB28|Q8NDH3|Q9HAU8|Q9NQH7	PROTEIN FAMILY	Homo sapiens	1	1	9606	FALSE
PKN1	CHEMBL3384	Protein kinase N1	Q16512	SINGLE PROTEIN	Homo sapiens	653	837	9606	FALSE
NA|NA	CHEMBL1907587	Neuronal acetylcholine receptor; alpha3/beta2	P04757|P12390	PROTEIN COMPLEX	Rattus norvegicus	330	431	10116	FALSE
NA	CHEMBL4630897	RNA-directed RNA polymerase L	P28887	SINGLE PROTEIN	Human respiratory syncytial virus A	NA	NA	208893	FALSE
NA	CHEMBL4303062	RNA-directed RNA polymerase L	Q05318	SINGLE PROTEIN	Zaire ebolavirus (strain Mayinga-76) (ZEBOV) (Zaire Ebola virus)	NA	NA	128952	FALSE
PRMT1	CHEMBL5524	Protein-arginine N-methyltransferase 1	Q99873	SINGLE PROTEIN	Homo sapiens	571	921	9606	FALSE
B3GALT5	CHEMBL2321635	Beta-1,3-galactosyltransferase 5	Q9Y2C3	SINGLE PROTEIN	Homo sapiens	26	26	9606	FALSE
NA	CHEMBL1075042	Endo-beta-N-acetylglucosaminidase	Q9ZB22	SINGLE PROTEIN	Arthrobacter protophormiae	4	4	37930	FALSE
NA	CHEMBL1795132	Alpha-1,6-mannosylglycoprotein 6-beta-N-acetylglucosaminyltransferase A	Q08834	SINGLE PROTEIN	Rattus norvegicus	1	9	10116	FALSE
NA|NA	CHEMBL4296086	Cacna1b/Cacnb3	Q02294|P54287	PROTEIN COMPLEX	Rattus norvegicus	1	1	10116	FALSE
CRBN|PRDM16	CHEMBL4742318	Cereblon/Histone-lysine N-methyltransferase PRDM16	Q96SW2|Q9HAZ2	PROTEIN-PROTEIN INTERACTION	Homo sapiens	1	1	9606	FALSE
NA|NA	CHEMBL1907593	Neuronal acetylcholine receptor; alpha3/beta4	P04757|P12392	PROTEIN COMPLEX	Rattus norvegicus	760	1383	10116	FALSE
NA	CHEMBL3309062	Histone-lysine N-methyltransferase, H3 lysine-9 specific dim-5 (EC 2.1.1.43) (Histone H3-K9 methyltransferase dim-5) (H3-K9-HMTase dim-5) (HKMT)	Q8X225	SINGLE PROTEIN	Neurospora crassa	1	1	367110	FALSE
NA	CHEMBL2366074	GI-ME-N	NA	CELL-LINE	Homo sapiens	137	139	9606	FALSE
PPIA	CHEMBL1949	Cyclophilin A	P62937	SINGLE PROTEIN	Homo sapiens	386	674	9606	FALSE
NCAM1	CHEMBL3712938	Neural cell adhesion molecule 1	P13591	SINGLE PROTEIN	Homo sapiens	1	2	9606	FALSE
GBA1	CHEMBL2179	Beta-glucocerebrosidase	P04062	SINGLE PROTEIN	Homo sapiens	12477	14768	9606	FALSE
NA	CHEMBL4719	Nitric-oxide synthase, brain	Q9Z0J4	SINGLE PROTEIN	Mus musculus	31	35	10090	FALSE
VCPKMT	CHEMBL3588742	Protein-lysine methyltransferase METTL21D	Q9H867	SINGLE PROTEIN	Homo sapiens	26	26	9606	FALSE
NA	CHEMBL2780	Cyclophilin A	P10111	SINGLE PROTEIN	Rattus norvegicus	49	61	10116	FALSE
NA	CHEMBL1615343	Shiga toxin 1 variant A subunit	Q7WZI7	SINGLE PROTEIN	Escherichia coli O157:H7	25	37	83334	FALSE
NA	CHEMBL3137	Methylenetetrahydrofolate dehydrogenase	Q922D8	SINGLE PROTEIN	Mus musculus	2	4	10090	FALSE
POU3F2	CHEMBL4189	Homeobox protein Brn-2	P20265	SINGLE PROTEIN	Homo sapiens	4	4	9606	FALSE
NAALAD2	CHEMBL2609	NAALADase II	Q9Y3Q0	SINGLE PROTEIN	Homo sapiens	20	20	9606	FALSE
NA|NA	CHEMBL4106181	Sialidase NEU3/NEU4	Q9JMH7|Q8BZL1	PROTEIN FAMILY	Mus musculus	2	2	10090	FALSE
MGAT5	CHEMBL1795131	Alpha-1,6-mannosylglycoprotein 6-beta-N-acetylglucosaminyltransferase A	Q09328	SINGLE PROTEIN	Homo sapiens	1	2	9606	FALSE
NMT1|NMT2	CHEMBL2096973	Peptide N-myristoyltransferase	P30419|O60551	PROTEIN FAMILY	Homo sapiens	101	241	9606	FALSE
NA	CHEMBL4251	Erythromycin resistance protein	P13956	SINGLE PROTEIN	Bacillus subtilis	30	32	1423	FALSE
B4GALT1	CHEMBL4384	Beta-1,4-galactosyltransferase 1	P15291	SINGLE PROTEIN	Homo sapiens	36	37	9606	FALSE
NA	CHEMBL2146344	Neutral ceramidase	Q9JHE3	SINGLE PROTEIN	Mus musculus	5	6	10090	FALSE
NA	CHEMBL4485	Histamine N-methyltransferase	Q9EST2	SINGLE PROTEIN	Cavia porcellus	26	58	10141	FALSE
NA	CHEMBL4117	Zinc aminopeptidase	O96935	SINGLE PROTEIN	Plasmodium falciparum FcB1/Columbia	870	902	186763	FALSE
NA	CHEMBL6067	LmbE-related protein	P9WJN3	SINGLE PROTEIN	Mycobacterium tuberculosis	31	42	1773	FALSE
GALNT10	CHEMBL4523371	Polypeptide N-acetylgalactosaminyltransferase 10	Q86SR1	SINGLE PROTEIN	Homo sapiens	1	1	9606	FALSE
CPN1	CHEMBL4713	Carboxypeptidase N, catalytic subunit	P15169	SINGLE PROTEIN	Homo sapiens	30	37	9606	FALSE
NEU4	CHEMBL4174	Sialidase 4	Q8WWR8	SINGLE PROTEIN	Homo sapiens	134	267	9606	FALSE
CSGALNACT1	CHEMBL2040705	Chondroitin sulfate N-acetylgalactosaminyltransferase 1	Q8TDX6	SINGLE PROTEIN	Homo sapiens	52	81	9606	FALSE
NA	CHEMBL4295590	Beta-hexosaminidase	Q06GJ0	SINGLE PROTEIN	Ostrinia furnacalis	16	19	93504	FALSE
YWHAB	CHEMBL3710403	14-3-3 protein beta/alpha	P31946	SINGLE PROTEIN	Homo sapiens	1	1	9606	FALSE
NA	CHEMBL1837	Trypanothione reductase	P39051	SINGLE PROTEIN	Trypanosoma brucei brucei	155	189	5702	FALSE
NA	CHEMBL4523933	tRNA (guanine-N(1)-)-methyltransferase	P9WFY7	SINGLE PROTEIN	Mycobacterium tuberculosis (strain ATCC 25618 / H37Rv)	3	13	83332	FALSE
NA	CHEMBL4295615	Peptidoglycan-N-acetylglucosamine deacetylase BC_1960	Q81EK9	SINGLE PROTEIN	Bacillus cereus (strain ATCC 14579 / DSM 31 / JCM 2152 / NBRC 15305 /NCIMB 9373 / NRRL B-3711)	1	2	226900	FALSE
NA|NA	CHEMBL2096911	Glutamate NMDA receptor; Grin1/Grin2c	P35439|Q00961	PROTEIN COMPLEX	Rattus norvegicus	637	1127	10116	FALSE
VEGFA|NRP1	CHEMBL5482974	VEGA-NRP1	P15692|O14786	PROTEIN-PROTEIN INTERACTION	Homo sapiens	19	35	9606	FALSE
VEGFA|FLT1	CHEMBL5482996	VEGFR1-VEGA	P15692|P17948	PROTEIN COMPLEX	Homo sapiens	2	2	9606	FALSE
MAP2K7|CRBN	CHEMBL4523678	Protein cereblon/MAP2K7	O14733|Q96SW2	PROTEIN-PROTEIN INTERACTION	Homo sapiens	1	2	9606	FALSE
NA|NA	CHEMBL4888457	HEXA/HEXB	Q0V8R6|H7BWW2	PROTEIN FAMILY	Bos taurus	8	9	9913	FALSE
NA|NA	CHEMBL4106166	N+/K+ ATPase alpha-4/beta-3	Q63377|Q64541	PROTEIN COMPLEX	Rattus norvegicus	1	1	10116	FALSE
FBXO11	CHEMBL4879484	F-box only protein 11	Q86XK2	SINGLE PROTEIN	Homo sapiens	3	3	9606	FALSE
GCNT1	CHEMBL2321632	Beta-1,3-galactosyl-O-glycosyl-glycoprotein beta-1,6-N-acetylglucosaminyltransferase	Q02742	SINGLE PROTEIN	Homo sapiens	3	3	9606	FALSE
NA	CHEMBL4879462	tRNA (guanine(26)-N(2))-dimethyltransferase	Q3TX08	SINGLE PROTEIN	Mus musculus	2	2	10090	FALSE
METTL16	CHEMBL5465326	RNA N6-adenosine-methyltransferase METTL16	Q86W50	SINGLE PROTEIN	Homo sapiens	3	3	9606	FALSE
NAGPA	CHEMBL5920	N-acetylglucosamine-1-phosphodiester alpha-N-acetylglucosaminidase	Q9UK23	SINGLE PROTEIN	Homo sapiens	10	10	9606	FALSE
KMT2B	CHEMBL2189112	Histone-lysine N-methyltransferase MLL4	Q9UMN6	SINGLE PROTEIN	Homo sapiens	9	11	9606	FALSE
NA|NA	CHEMBL3885526	Beta-galactosidase/Glucosylceramidase	Q58D55|Q2KHZ8	PROTEIN FAMILY	Bos taurus	5	5	9913	FALSE
NA	CHEMBL4295889	N-fatty-acyl-amino acid synthase/hydrolase PM20D1	Q8C165	SINGLE PROTEIN	Mus musculus	5	5	10090	FALSE
NAGA	CHEMBL3132	Alpha-galactosidase B	P17050	SINGLE PROTEIN	Homo sapiens	11	11	9606	FALSE
NGLY1	CHEMBL4523429	Peptide-N(4)-(N-acetyl-beta-glucosaminyl)asparagine amidase	Q96IV0	SINGLE PROTEIN	Homo sapiens	12	35	9606	FALSE
NA	CHEMBL1921665	Phospho-N-acetylmuramoyl-pentapeptide-transferase	P9WMW7	SINGLE PROTEIN	Mycobacterium tuberculosis	2	2	1773	FALSE
HEXA	CHEMBL1250415	Beta-hexosaminidase subunit alpha	P06865	SINGLE PROTEIN	Homo sapiens	22	76	9606	FALSE
HEXB	CHEMBL5877	Beta-hexosaminidase subunit beta	P07686	SINGLE PROTEIN	Homo sapiens	75	131	9606	FALSE
GRIN1|GRIN2A|GRIN2B	CHEMBL5483086	Glutamate NMDA receptor; GRIN1/GRIN2A/GRIN2B	Q05586|Q12879|Q13224	PROTEIN COMPLEX	Homo sapiens	1	1	9606	FALSE
OGG1	CHEMBL3396944	N-glycosylase/DNA lyase	O15527	SINGLE PROTEIN	Homo sapiens	27	86	9606	FALSE
NA	CHEMBL1275219	Glucosylceramidase	Q2KHZ8	SINGLE PROTEIN	Bos taurus	51	58	9913	FALSE
BIRC3|HTT	CHEMBL4296121	Baculoviral IAP repeat-containing protein 3/Huntingtin	Q13489|P42858	PROTEIN-PROTEIN INTERACTION	Homo sapiens	3	23	9606	FALSE
ADGRG6	CHEMBL4523884	Adhesion G-protein coupled receptor G6	Q86SQ4	SINGLE PROTEIN	Homo sapiens	1	1	9606	FALSE
NAGK	CHEMBL4295978	N-acetyl-D-glucosamine kinase	Q9UJ70	SINGLE PROTEIN	Homo sapiens	1	2	9606	FALSE
SETD1A	CHEMBL4105954	Histone-lysine N-methyltransferase SETD1A	O15047	SINGLE PROTEIN	Homo sapiens	1	1	9606	FALSE
PPP6C	CHEMBL4105731	Serine/threonine-protein phosphatase 6 catalytic subunit	O00743	SINGLE PROTEIN	Homo sapiens	5	5	9606	FALSE
MGAT1	CHEMBL2375207	Alpha-1,3-mannosyl-glycoprotein 2-beta-N-acetylglucosaminyltransferase	P26572	SINGLE PROTEIN	Homo sapiens	12	13	9606	FALSE
NT5C2	CHEMBL3708197	Cytosolic purine 5'-nucleotidase	P49902	SINGLE PROTEIN	Homo sapiens	44	72	9606	FALSE
NA	CHEMBL4295560	Phospho-N-acetylmuramoyl-pentapeptide-transferase	O66465	SINGLE PROTEIN	Aquifex aeolicus (strain VF5)	26	26	224324	FALSE
NA	CHEMBL4534	Putative beta-hexosaminidase	Q9RK76	SINGLE PROTEIN	Streptomyces coelicolor (strain ATCC BAA-471 / A3(2) / M145)	2	2	100226	FALSE
NA	CHEMBL4874	Phenylethanolamine N-methyltransferase	P40935	SINGLE PROTEIN	Mus musculus	3	5	10090	FALSE
GNE	CHEMBL4523504	Bifunctional UDP-N-acetylglucosamine 2-epimerase/N-acetylmannosamine kinase	Q9Y223	SINGLE PROTEIN	Homo sapiens	2	2	9606	FALSE
NDRG1	CHEMBL4295916	Protein NDRG1	Q92597	SINGLE PROTEIN	Homo sapiens	4	5	9606	FALSE
GALE	CHEMBL5843	UDP-glucose 4-epimerase	Q14376	SINGLE PROTEIN	Homo sapiens	7	7	9606	FALSE
HDAC2|NCOR2	CHEMBL3885591	Histone deacetylase 2/Nuclear receptor corepressor 2	Q92769|Q9Y618	PROTEIN COMPLEX	Homo sapiens	6	6	9606	FALSE
VHL|NTMT2	CHEMBL5291693	VHL/NTMT2	P40337|Q5VVY1	PROTEIN-PROTEIN INTERACTION	Homo sapiens	1	2	9606	FALSE
NSD1	CHEMBL3588738	Histone-lysine N-methyltransferase, H3 lysine-36 and H4 lysine-20 specific	Q96L73	SINGLE PROTEIN	Homo sapiens	76	111	9606	FALSE
NA	CHEMBL1275220	Protein arginine N-methyltransferase 1	Q63009	SINGLE PROTEIN	Rattus norvegicus	31	55	10116	FALSE
NNMT	CHEMBL2346486	Nicotinamide N-methyltransferase	P40261	SINGLE PROTEIN	Homo sapiens	360	593	9606	FALSE
NA	CHEMBL3158	Isopenicillin N synthetase	P08703	SINGLE PROTEIN	Penicillium chrysogenum	42	43	5076	FALSE
NA	CHEMBL3442	Glutamate [NMDA] receptor subunit epsilon 2	Q01097	SINGLE PROTEIN	Mus musculus	94	96	10090	FALSE
NA	CHEMBL3214	Beta-1,4-galactosyltransferase 1	P08037	SINGLE PROTEIN	Bos taurus	41	61	9913	FALSE
NA	CHEMBL3112380	UDP-N-acetylmuramoyl-tripeptide--D-alanyl-D-alanine ligase	Q9ZHC3	SINGLE PROTEIN	Streptococcus pneumoniae	39	39	1313	FALSE
NA	CHEMBL3638365	Amyloid-beta A4 protein	P08592	SINGLE PROTEIN	Rattus norvegicus	43	43	10116	FALSE
HEXD	CHEMBL5169180	Hexosaminidase D	Q8WVB3	SINGLE PROTEIN	Homo sapiens	11	11	9606	FALSE
ASH1L	CHEMBL3588739	Histone-lysine N-methyltransferase ASH1L	Q9NR48	SINGLE PROTEIN	Homo sapiens	469	485	9606	FALSE
SAE1	CHEMBL1615388	SUMO-activating enzyme subunit 1	Q9UBE0	SINGLE PROTEIN	Homo sapiens	48	97	9606	FALSE
SUV39H1	CHEMBL1795118	Histone-lysine N-methyltransferase SUV39H1	O43463	SINGLE PROTEIN	Homo sapiens	100	117	9606	FALSE
SETD1B	CHEMBL4105837	Histone-lysine N-methyltransferase SETD1B	Q9UPS6	SINGLE PROTEIN	Homo sapiens	7	8	9606	FALSE
EIF4A3	CHEMBL4105832	Eukaryotic initiation factor 4A-III	P38919	SINGLE PROTEIN	Homo sapiens	80	131	9606	FALSE
ARSG	CHEMBL2189124	Arylsulfatase G	Q96EG1	SINGLE PROTEIN	Homo sapiens	1	2	9606	FALSE
NA	CHEMBL2176840	Trypanothione reductase	P39050	SINGLE PROTEIN	Leishmania donovani	22	73	5661	FALSE
CRBN|AGRN	CHEMBL4742252	Cereblon/Agrin	Q96SW2|O00468	PROTEIN-PROTEIN INTERACTION	Homo sapiens	1	1	9606	FALSE
NA	CHEMBL2268004	Zeta-carotene desaturase, chloroplastic/chromoplastic	Q9SMJ3	SINGLE PROTEIN	Capsicum annuum	45	45	4072	FALSE
NA	CHEMBL4723	Endo-b-N-acetylglucosaminidase	Q9C1S6	SINGLE PROTEIN	Mucor hiemalis	9	15	64493	FALSE
NA	CHEMBL4732	UDP-N-acetylmuramoylalanine--D-glutamate ligase	P14900	SINGLE PROTEIN	Escherichia coli K-12	66	81	83333	FALSE
NA	CHEMBL2189140	Aminopeptidase N	P97449	SINGLE PROTEIN	Mus musculus	7	8	10090	FALSE
NA	CHEMBL4753	Beta-galactosidase	P29853	SINGLE PROTEIN	Aspergillus niger	50	64	5061	FALSE
PARP1|CRBN	CHEMBL4742271	Cereblon/PARP1	P09874|Q96SW2	PROTEIN-PROTEIN INTERACTION	Homo sapiens	27	187	9606	FALSE
SAE1|UBA2	CHEMBL2095174	SUMO-activating enzyme	Q9UBE0|Q9UBT2	PROTEIN COMPLEX	Homo sapiens	474	861	9606	FALSE
NA	CHEMBL2169722	Glycylpeptide N-tetradecanoyltransferase	Q8ILW6	SINGLE PROTEIN	Plasmodium falciparum (isolate 3D7)	117	128	36329	FALSE
NA	CHEMBL1075151	Phospho-N-acetylmuramoyl-pentapeptide-transferase	Q03521	SINGLE PROTEIN	Bacillus subtilis (strain 168)	51	67	224308	FALSE
NA	CHEMBL2439943	Huntingtin	P51111	SINGLE PROTEIN	Rattus norvegicus	4	4	10116	FALSE
NA	CHEMBL1075040	UDP-3-O-[3-hydroxymyristoyl] N-acetylglucosamine deacetylase	O67648	SINGLE PROTEIN	Aquifex aeolicus (strain VF5)	13	13	224324	FALSE
NA	CHEMBL3988621	N(G),N(G)-dimethylarginine dimethylaminohydrolase 1	Q9CWS0	SINGLE PROTEIN	Mus musculus	2	2	10090	FALSE
NA	CHEMBL3329079	2'-deoxynucleoside 5'-phosphate N-hydrolase 1	O35820	SINGLE PROTEIN	Rattus norvegicus	25	25	10116	FALSE
NA	CHEMBL3414415	Bifunctional protein GlmU	P0ACC7	SINGLE PROTEIN	Escherichia coli (strain K12)	115	174	83333	FALSE
YWHAG	CHEMBL1293296	14-3-3 protein gamma	P61981	SINGLE PROTEIN	Homo sapiens	56	58	9606	FALSE
FGFR1|CRBN	CHEMBL5291677	Cereblon/FGFR1	P11362|Q96SW2	PROTEIN-PROTEIN INTERACTION	Homo sapiens	6	8	9606	FALSE
NA	CHEMBL2540	UDP-N-acetylmuramoyl-tripeptide--D-alanyl-D-alanine ligase	P11880	SINGLE PROTEIN	Escherichia coli K-12	27	77	83333	FALSE
MTHFD1	CHEMBL2541	Methylenetetrahydrofolate dehydrogenase	P11586	SINGLE PROTEIN	Homo sapiens	57	68	9606	FALSE
KMT2C	CHEMBL2189113	Histone-lysine N-methyltransferase MLL3	Q8NEZ4	SINGLE PROTEIN	Homo sapiens	40	47	9606	FALSE
NMT2	CHEMBL2849	Peptide N-myristoyltransferase 2	O60551	SINGLE PROTEIN	Homo sapiens	44	44	9606	FALSE
NA	CHEMBL5291569	UDP-N-acetylmuramoyl-L-alanyl-D-glutamate--2,6-diaminopimelate ligase	P9WJL3	SINGLE PROTEIN	Mycobacterium tuberculosis (strain ATCC 25618 / H37Rv)	1	1	83332	FALSE
SETMAR	CHEMBL2189111	Histone-lysine N-methyltransferase SETMAR	Q53H47	SINGLE PROTEIN	Homo sapiens	3	3	9606	FALSE
C1GALT1	CHEMBL2321633	Glycoprotein-N-acetylgalactosamine 3-beta-galactosyltransferase 1	Q9NS00	SINGLE PROTEIN	Homo sapiens	3	3	9606	FALSE
CERS6	CHEMBL5291517	Ceramide synthase 6	Q6ZMG9	SINGLE PROTEIN	Homo sapiens	2	2	9606	FALSE
NA	CHEMBL4089	UDP-N-acetylmuramate dehydrogenase	P61431	SINGLE PROTEIN	Staphylococcus aureus	43	43	1280	FALSE
RNMT	CHEMBL4295662	mRNA cap guanine-N7 methyltransferase	O43148	SINGLE PROTEIN	Homo sapiens	48	65	9606	FALSE
NA	CHEMBL5291562	Trypanothione reductase	P13110	SINGLE PROTEIN	Trypanosoma congolense	3	3	5692	FALSE
KDR|FGFR1	CHEMBL2111439	VEGF-receptor 2 and Fibroblast growth factor receptor 1	P35968|P11362	PROTEIN FAMILY	Homo sapiens	50	50	9606	FALSE
NA	CHEMBL3989385	Poly-N-acetylglucosamine	NA	OLIGOSACCHARIDE	Staphylococcus aureus	NA	NA	1280	FALSE
ST6GAL1	CHEMBL3596075	Beta-galactoside alpha-2,6-sialyltransferase 1	P15907	SINGLE PROTEIN	Homo sapiens	67	179	9606	FALSE
DIO1	CHEMBL2019	Type I iodothyronine deiodinase (Type-I 5'-deiodinase) (DIOI) (Type 1 DI) (5DI)	P49895	SINGLE PROTEIN	Homo sapiens	NA	NA	9606	FALSE
FUT4	CHEMBL4996	Fucosyltransferase 4	P22083	SINGLE PROTEIN	Homo sapiens	15	41	9606	FALSE
CRBN|CSDE1	CHEMBL4742265	Cereblon/Cold shock domain-containing protein E1	Q96SW2|O75534	PROTEIN-PROTEIN INTERACTION	Homo sapiens	1	1	9606	FALSE
VHL|AGRN	CHEMBL4748214	VHL/Agrin	P40337|O00468	PROTEIN-PROTEIN INTERACTION	Homo sapiens	1	1	9606	FALSE
NA	CHEMBL3988591	Glycylpeptide N-tetradecanoyltransferase	Q9UVX3	SINGLE PROTEIN	Neosartorya fumigata (strain ATCC MYA-4609 / Af293 / CBS 101355 / FGSCA1100) (Aspergillus fumigatus)	27	27	330879	FALSE
NA	CHEMBL1075027	B-N-acetylhexosaminidase	O85361	SINGLE PROTEIN	Streptomyces plicatus	7	7	1922	FALSE
ADM	CHEMBL2062356	ADM	P35318	SINGLE PROTEIN	Homo sapiens	32	35	9606	FALSE
TNF	CHEMBL1825	TNF-alpha	P01375	SINGLE PROTEIN	Homo sapiens	1175	1907	9606	FALSE
YARS1	CHEMBL3179	Tyrosyl-tRNA synthetase	P54577	SINGLE PROTEIN	Homo sapiens	274	278	9606	FALSE
NA	CHEMBL5526	UDP-N-acetylmuramate dehydrogenase	P08373	SINGLE PROTEIN	Escherichia coli K-12	109	113	83333	FALSE
DIO3	CHEMBL3611	Type III iodothyronine deiodinase	P55073	SINGLE PROTEIN	Homo sapiens	9	17	9606	FALSE
B3GNT4	CHEMBL5465353	N-acetyllactosaminide beta-1,3-N-acetylglucosaminyltransferase 4	Q9C0J1	SINGLE PROTEIN	Homo sapiens	22	22	9606	FALSE
NA	CHEMBL4523934	tRNA (guanine-N(1)-)-methyltransferase	Q2FZ43	SINGLE PROTEIN	Staphylococcus aureus (strain NCTC 8325 / PS 47)	3	10	93061	FALSE
NOS1|NOS3	CHEMBL2111405	Nitric-oxide synthase (endothelial and brain)	P29475|P29474	SELECTIVITY GROUP	Homo sapiens	156	169	9606	FALSE
CACNA2D1|CACNA1B|CACNB1	CHEMBL4106160	N-type calcium channel alpha-1b/alpha2delta-1/beta-1b	P54289|Q00975|Q02641	PROTEIN COMPLEX	Homo sapiens	50	50	9606	FALSE
MAP2K4	CHEMBL2897	Dual specificity mitogen-activated protein kinase kinase 4	P45985	SINGLE PROTEIN	Homo sapiens	672	1105	9606	FALSE
NAAA	CHEMBL4349	N-acylsphingosine-amidohydrolase	Q02083	SINGLE PROTEIN	Homo sapiens	331	450	9606	FALSE
FTO	CHEMBL2331065	Alpha-ketoglutarate-dependent dioxygenase FTO	Q9C0B1	SINGLE PROTEIN	Homo sapiens	391	563	9606	FALSE
NA	CHEMBL4105926	Sialidase-1	O35657	SINGLE PROTEIN	Mus musculus	4	13	10090	FALSE
NA	CHEMBL4523446	Gasdermin-D	Q9D8T2	SINGLE PROTEIN	Mus musculus	6	7	10090	FALSE
ACTB	CHEMBL2062353	Actin, cytoplasmic 1	P60709	SINGLE PROTEIN	Homo sapiens	7	15	9606	FALSE
NA	CHEMBL3451	Glutamate (NMDA) receptor subunit zeta 1	O19067	SINGLE PROTEIN	Sus scrofa	3	9	9823	FALSE
NA	CHEMBL5058623	SK-N-BE(2)	NA	CELL-LINE	Homo sapiens	35	49	9606	FALSE
PLAAT5	CHEMBL4630850	Phospholipase A and acyltransferase 5	Q96KN8	SINGLE PROTEIN	Homo sapiens	56	67	9606	FALSE
KMT5C	CHEMBL2321644	Histone-lysine N-methyltransferase SUV420H2	Q86Y97	SINGLE PROTEIN	Homo sapiens	49	60	9606	FALSE
KRAS|VHL	CHEMBL5169273	VHL/KRAS	P01116|P40337	PROTEIN-PROTEIN INTERACTION	Homo sapiens	16	69	9606	FALSE
NA	CHEMBL1075579	SK-N-DZ	NA	CELL-LINE	Homo sapiens	142	144	9606	FALSE
CDH2	CHEMBL1697669	Cadherin-2	P19022	SINGLE PROTEIN	Homo sapiens	3	7	9606	FALSE
SAT2	CHEMBL3509592	Diamine acetyltransferase 2	Q96F10	SINGLE PROTEIN	Homo sapiens	6	15	9606	FALSE
FMO1	CHEMBL3430872	Dimethylaniline monooxygenase [N-oxide-forming] 1	Q01740	SINGLE PROTEIN	Homo sapiens	2	3	9606	FALSE
FMO5	CHEMBL3430871	Dimethylaniline monooxygenase [N-oxide-forming] 5	P49326	SINGLE PROTEIN	Homo sapiens	3	13	9606	FALSE
HNRNPH1	CHEMBL3797013	Heterogeneous nuclear ribonucleoprotein H	P31943	SINGLE PROTEIN	Homo sapiens	1	1	9606	FALSE
NA|NA	CHEMBL4106170	Sialidase NEU1/NEU4	O35657|Q8BZL1	PROTEIN FAMILY	Mus musculus	1	1	10090	FALSE
GALNS	CHEMBL4523218	N-acetylgalactosamine-6-sulfatase	P34059	SINGLE PROTEIN	Homo sapiens	3	25	9606	FALSE
MAPK8|MAPK10|MAPK9	CHEMBL2096667	c-Jun N-terminal kinase, JNK	P45983|P53779|P45984	PROTEIN FAMILY	Homo sapiens	555	691	9606	FALSE
MAPK10	CHEMBL2637	c-Jun N-terminal kinase 3	P53779	SINGLE PROTEIN	Homo sapiens	2916	3789	9606	FALSE
PRMT5	CHEMBL1795116	Protein arginine N-methyltransferase 5	O14744	SINGLE PROTEIN	Homo sapiens	1117	1310	9606	FALSE
NA|NA|NA|NA|NA|NA|NA	CHEMBL3832634	Glutamate NMDA receptor	P35436|Q91ZU9|Q03391|P35438|Q01097|Q01098|A2AIR5	PROTEIN COMPLEX GROUP	Mus musculus	63	82	10090	FALSE
APP	CHEMBL2487	Amyloid-beta A4 protein	P05067	SINGLE PROTEIN	Homo sapiens	4958	8968	9606	FALSE
NA	CHEMBL2366065	KP-N-YS	NA	CELL-LINE	Homo sapiens	129	130	9606	FALSE
VEGFA	CHEMBL1783	Vascular endothelial growth factor A	P15692	SINGLE PROTEIN	Homo sapiens	132	253	9606	FALSE
GRIN1|GRIN2A	CHEMBL1907604	Glutamate NMDA receptor; GRIN1/GRIN2A	Q05586|Q12879	PROTEIN COMPLEX	Homo sapiens	430	726	9606	FALSE
NA	CHEMBL614078	MDA-N	NA	CELL-LINE	Homo sapiens	27772	28205	9606	FALSE
NEU3	CHEMBL3046	Sialidase 3	Q9UQ49	SINGLE PROTEIN	Homo sapiens	252	398	9606	FALSE
NA	CHEMBL1984	UDP-N-acetylglucosamine 1-carboxyvinyltransferase	P0A749	SINGLE PROTEIN	Escherichia coli K-12	238	449	83333	FALSE
RPSA|RPS27|RPS6|RPS2|RPS3|RPS3A|RPS4X|RPS4Y1|RPS5|RPS7|RPS8|RPS9|RPS10|RPS11|RPS12|RPS13|RPS14|RPS15|RPS15A|RPS16|RPS17|RPS18|RPS19|RPS20|RPS21|RPS23|RPS24|RPS25|RPS26|RPS27A|RPS28|RPS29|FAU|RPL3|RPL4|RPL5|RPL6|RPL7|RPL7A|RPL8|RPL9|RPL10|RPL10A|RPL11|RPL12|RPL13|RPL13A|RPL14|RPL15|RPL17|RPL18|RPL18A|RPL19|RPL21|RPL22|RPL23|RPL23A|RPL24|RPL26|RPL27|RPL27A|RPL28|RPL29|RPL30|RPL31|RPL32|RPL34|RPL35|…	CHEMBL3987582	80S Ribosome	P08865|P42677|P62753|P15880|P23396|P61247|P62701|P22090|P46782|P62081|P62241|P46781|P46783|P62280|P25398|P62277|P62263|P62841|P62244|P62249|P08708|P62269|P39019|P60866|P63220|P62266|P62847|P62851|P62854|P62979|P62857|P62273|P62861|P39023|P36578|P46777|Q02878|P18124|P62424|P62917|P32969|P27635|P62906|P62913|P30050|P26373|P40429|P50914|P61313|P18621|Q07020|Q02543|P84098|P46778|P35268|P62829|P62750|…	PROTEIN NUCLEIC-ACID COMPLEX	Homo sapiens	101	239	9606	FALSE
PARP1|PARP3|PARP2	CHEMBL3390820	PARP 1, 2 and 3	P09874|Q9Y6F1|Q9UGN5	PROTEIN FAMILY	Homo sapiens	96	151	9606	FALSE
SRPK2	CHEMBL5668	Serine/threonine-protein kinase SRPK2	P78362	SINGLE PROTEIN	Homo sapiens	529	817	9606	FALSE
GRIN2A	CHEMBL1972	Glutamate [NMDA] receptor subunit epsilon 1	Q12879	SINGLE PROTEIN	Homo sapiens	84	115	9606	FALSE
HRAS|NRAS|KRAS	CHEMBL4524006	RAS	P01112|P01111|P01116	PROTEIN FAMILY	Homo sapiens	2	4	9606	FALSE
FGF23	CHEMBL3713913	Fibroblast growth factor 23	Q9GZV9	SINGLE PROTEIN	Homo sapiens	36	45	9606	FALSE
PARP1	CHEMBL3105	Poly [ADP-ribose] polymerase-1	P09874	SINGLE PROTEIN	Homo sapiens	4548	6482	9606	FALSE

## Sheet: Sheet2
#node1	node2	node1_string_internal_id	node2_string_internal_id	node1_external_id	node2_external_id	neighborhood_on_chromosome	gene_fusion	phylogenetic_cooccurrence	homology	coexpression	experimentally_determined_interaction	database_annotated	automated_textmining	prediction	combined_score
RAD21	CDCA5	1847857	1846446	9606.ENSP00000297338	9606.ENSP00000275517	0	0	0	0	0	0.912	0.9	0.602	0	0.996
CENPF	CDCA5	1854480	1846446	9606.ENSP00000355922	9606.ENSP00000275517	0	0	0	0	0.097	0	0.9	0.264	0	0.927
CENPF	RAD21	1854480	1847857	9606.ENSP00000355922	9606.ENSP00000297338	0	0	0	0	0	0	0.9	0.202	0	0.916
FOXL1	DnHP	1850817	-6786	9606.ENSP00000326272	-1.CID000006786	0	0	0	0	0	0	0	0.232	0	0.232
FOXD1	DnHP	1863735	-6786	9606.ENSP00000462795	-1.CID000006786	0	0	0	0	0	0	0	0.218	0	0.219
CENPF	DnHP	1854480	-6786	9606.ENSP00000355922	-1.CID000006786	0	0	0	0	0	0	0	0.215	0	0.216
RAD21	DnHP	1847857	-6786	9606.ENSP00000297338	-1.CID000006786	0	0	0	0	0	0	0	0.215	0	0.215
POLK	DnHP	1843597	-6786	9606.ENSP00000241436	-1.CID000006786	0	0	0	0	0	0	0	0.212	0	0.212
CDCA5	DnHP	1846446	-6786	9606.ENSP00000275517	-1.CID000006786	0	0	0	0	0	0	0	0.21	0	0.211
AMH	DnHP	1842844	-6786	9606.ENSP00000221496	-1.CID000006786	0	0	0	0	0	0	0	0.19	0	0.19
ACOT13	DnHP	1843233	-6786	9606.ENSP00000230048	-1.CID000006786	0	0	0	0	0	0	0	0.184	0	0.184
PNLIP	DnHP	1854981	-6786	9606.ENSP00000358223	-1.CID000006786	0	0	0	0	0	0	0	0.179	0	0.179

## Sheet: SwissTargetPrediction
SwissTargetPrediction
Target	Common name	Uniprot ID	ChEMBL ID	Target Class	Probability*	Known actives (3D/2D)
Protein-tyrosine phosphatase 1B	PTPN1	P18031	CHEMBL335	Phosphatase	0.104672	31 / 10
Protein farnesyltransferase	FNTA FNTB	P49354 P49356	CHEMBL2094108	Enzyme	0.104672	439 / 0
Phosphodiesterase 5A	PDE5A	O76074	CHEMBL1827	Phosphodiesterase	0.104672	306 / 0
Metabotropic glutamate receptor 2	GRM2	Q14416	CHEMBL5137	Family C G protein-coupled receptor	0.104672	88 / 0
Proteinase-activated receptor 1	F2R	P25116	CHEMBL3974	Family A G protein-coupled receptor	0.104672	52 / 0
Vascular endothelial growth factor receptor 1	FLT1	P17948	CHEMBL1868	Kinase	0.104672	136 / 0
Platelet-derived growth factor receptor beta	PDGFRB	P09619	CHEMBL1913	Kinase	0.104672	80 / 0
Stem cell growth factor receptor	KIT	P10721	CHEMBL1936	Kinase	0.104672	90 / 0
Phosphodiesterase 10A	PDE10A	Q9Y233	CHEMBL4409	Phosphodiesterase	0.104672	1532 / 0
FK506-binding protein 1A	FKBP1A	P62942	CHEMBL1902	Isomerase	0.104672	136 / 0
Smoothened homolog	SMO	Q99835	CHEMBL5971	Frizzled family G protein-coupled receptor	0.104672	180 / 0
GABA-A receptor; alpha-3/beta-3/gamma-2	GABRB3 GABRA3 GABRG2	P28472 P34903 P18507	CHEMBL2094120	Ligand-gated ion channel	0.104672	292 / 0
GABA-A receptor; alpha-1/beta-3/gamma-2	GABRB3 GABRG2 GABRA1	P28472 P18507 P14867	CHEMBL2094121	Ligand-gated ion channel	0.104672	238 / 0
GABA-A receptor; alpha-5/beta-3/gamma-2	GABRB3 GABRG2 GABRA5	P28472 P18507 P31644	CHEMBL2094122	Ligand-gated ion channel	0.104672	262 / 0
GABA-A receptor; alpha-2/beta-3/gamma-2	GABRA2 GABRB3 GABRG2	P47869 P28472 P18507	CHEMBL2094130	Ligand-gated ion channel	0.104672	252 / 0
N-arachidonyl glycine receptor	GPR18	Q14330	CHEMBL2384898	Family A G protein-coupled receptor	0.104672	9 / 0
Leukocyte elastase	ELANE	P08246	CHEMBL248	Protease	0.104672	164 / 0
Sodium channel protein type IV alpha subunit	SCN4A	P35499	CHEMBL2072	Voltage-gated ion channel	0.104672	2 / 0
Protein kinase C delta	PRKCD	Q05655	CHEMBL2996	Kinase	0.104672	27 / 9
c-Jun N-terminal kinase 3	MAPK10	P53779	CHEMBL2637	Kinase	0.104672	195 / 0
c-Jun N-terminal kinase 2	MAPK9	P45984	CHEMBL4179	Kinase	0.104672	129 / 0
G protein-coupled receptor 44	PTGDR2	Q9Y5Y4	CHEMBL5071	Family A G protein-coupled receptor	0.104672	27 / 0
Carboxypeptidase B	CPB1	P15086	CHEMBL2552	Protease	0.104672	3 / 0
Estradiol 17-beta-dehydrogenase 2	HSD17B2	P37059	CHEMBL2789	Enzyme	0.104672	39 / 0
Estradiol 17-beta-dehydrogenase 1	HSD17B1	P14061	CHEMBL3181	Enzyme	0.104672	22 / 0
Metabotropic glutamate receptor 5 (by homology)	GRM5	P41594	CHEMBL3227	Family C G protein-coupled receptor	0.104672	1112 / 0
Nuclear receptor ROR-gamma	RORC	P51449	CHEMBL1741186	Nuclear receptor	0.104672	134 / 0
Prostanoid EP1 receptor	PTGER1	P34995	CHEMBL1811	Family A G protein-coupled receptor	0.104672	79 / 0
Prostanoid FP receptor	PTGFR	P43088	CHEMBL1987	Family A G protein-coupled receptor	0.104672	1 / 0
Androgen Receptor	AR	P10275	CHEMBL1871	Nuclear receptor	0.104672	86 / 1
Cathepsin K	CTSK	P43235	CHEMBL268	Protease	0.104672	388 / 0
Cathepsin S	CTSS	P25774	CHEMBL2954	Protease	0.104672	297 / 0
Hypoxia-inducible factor 1 alpha	HIF1A	Q16665	CHEMBL4261	Transcription factor	0.104672	24 / 0
G-protein coupled bile acid receptor 1	GPBAR1	Q8TDU6	CHEMBL5409	Family A G protein-coupled receptor	0.104672	49 / 0
Epidermal growth factor receptor erbB1	EGFR	P00533	CHEMBL203	Kinase	0.104672	665 / 0
Anandamide amidohydrolase	FAAH	O00519	CHEMBL2243	Enzyme	0.104672	293 / 0
Caspase-3	CASP3	P42574	CHEMBL2334	Protease	0.104672	127 / 0
Caspase-6	CASP6	P55212	CHEMBL3308	Protease	0.104672	19 / 0
Caspase-7	CASP7	P55210	CHEMBL3468	Protease	0.104672	77 / 0
Glycine transporter 1	SLC6A9	P48067	CHEMBL2337	Electrochemical transporter	0.104672	139 / 0
Metabotropic glutamate receptor 4	GRM4	Q14833	CHEMBL2736	Family C G protein-coupled receptor	0.104672	112 / 0
Serotonin 6 (5-HT6) receptor	HTR6	P50406	CHEMBL3371	Family A G protein-coupled receptor	0.104672	218 / 0
ATP-binding cassette sub-family G member 2	ABCG2	Q9UNQ0	CHEMBL5393	Primary active transporter	0.104672	73 / 0
Protein kinase C alpha	PRKCA	P17252	CHEMBL299	Kinase	0.104672	29 / 10
Bile acid receptor FXR	NR1H4	Q96RI1	CHEMBL2047	Nuclear receptor	0.104672	53 / 0
Progesterone receptor	PGR	P06401	CHEMBL208	Nuclear receptor	0.104672	145 / 0
Nuclear receptor ROR-beta	RORB	Q92753	CHEMBL3091268	Nuclear receptor	0.104672	6 / 0
Pregnane X receptor	NR1I2	O75469	CHEMBL3401	Nuclear receptor	0.104672	16 / 0
Nuclear receptor ROR-alpha	RORA	P35398	CHEMBL5868	Nuclear receptor	0.104672	5 / 0
Transitional endoplasmic reticulum ATPase	VCP	P55072	CHEMBL1075145	Primary active transporter	0.104672	44 / 0
Steroid 5-alpha-reductase 1	SRD5A1	P18405	CHEMBL1787	Oxidoreductase	0.104672	23 / 0
Adenosine A1 receptor	ADORA1	P30542	CHEMBL226	Family A G protein-coupled receptor	0.104672	798 / 0
Adenosine A2a receptor	ADORA2A	P29274	CHEMBL251	Family A G protein-coupled receptor	0.104672	610 / 0
MAP kinase p38 alpha	MAPK14	Q16539	CHEMBL260	Kinase	0.104672	982 / 0
Tyrosine-protein kinase JAK2	JAK2	O60674	CHEMBL2971	Kinase	0.104672	323 / 0
Dual specificity mitogen-activated protein kinase kinase 1	MAP2K1	Q02750	CHEMBL3587	Kinase	0.104672	54 / 0
Toll-like receptor (TLR7/TLR9)	TLR9	Q9NR96	CHEMBL5804	Toll-like and Il-1 receptors	0.104672	31 / 0
Oxytocin receptor (by homology)	OXTR	P30559	CHEMBL2049	Family A G protein-coupled receptor	0.104672	177 / 0
Serotonin 2c (5-HT2c) receptor	HTR2C	P28335	CHEMBL225	Family A G protein-coupled receptor	0.104672	215 / 0
Poly [ADP-ribose] polymerase-1	PARP1	P09874	CHEMBL3105	Enzyme	0.104672	178 / 0
P2X purinoceptor 3	P2RX3	P56373	CHEMBL2998	Ligand-gated ion channel	0.104672	35 / 0
Potassium channel subfamily K member 2 (by homology)	KCNK2	O95069	CHEMBL2321615	Voltage-gated ion channel	0.104672	0 / 1
Serotonin 2b (5-HT2b) receptor	HTR2B	P41595	CHEMBL1833	Family A G protein-coupled receptor	0.104672	70 / 0
Thromboxane-A synthase	TBXAS1	P24557	CHEMBL1835	Cytochrome P450	0.104672	24 / 0
Serotonin 2a (5-HT2a) receptor	HTR2A	P28223	CHEMBL224	Family A G protein-coupled receptor	0.104672	273 / 0
Phosphodiesterase 4A	PDE4A	P27815	CHEMBL254	Phosphodiesterase	0.104672	113 / 0
Phosphodiesterase 4B	PDE4B	Q07343	CHEMBL275	Phosphodiesterase	0.104672	206 / 0
Phosphodiesterase 4C	PDE4C	Q08493	CHEMBL291	Phosphodiesterase	0.104672	36 / 0
5-lipoxygenase activating protein	ALOX5AP	P20292	CHEMBL4550	Other cytosolic protein	0.104672	86 / 0
Geranylgeranyl transferase type I	PGGT1B FNTA	P53609 P49354	CHEMBL2095164	Enzyme	0.104672	121 / 0
Phosphodiesterase 3	PDE3A	Q14432	CHEMBL241	Phosphodiesterase	0.104672	34 / 0
Phosphodiesterase 11A	PDE11A	Q9HCR9	CHEMBL2717	Phosphodiesterase	0.104672	13 / 0
Phosphodiesterase 3B	PDE3B	Q13370	CHEMBL290	Phosphodiesterase	0.104672	24 / 0
Phosphodiesterase 1A	PDE1A	P54750	CHEMBL3421	Phosphodiesterase	0.104672	4 / 0
MAP kinase p38 beta	MAPK11	Q15759	CHEMBL3961	Kinase	0.104672	70 / 0
Phosphodiesterase 1C	PDE1C	Q14123	CHEMBL4619	Phosphodiesterase	0.104672	10 / 0
Caspase-1	CASP1	P29466	CHEMBL4801	Protease	0.104672	18 / 0
Translocator protein	TSPO	P30536	CHEMBL5742	Membrane receptor	0.104672	483 / 0
Sodium channel protein type V alpha subunit	SCN5A	Q14524	CHEMBL1980	Voltage-gated ion channel	0.104672	33 / 0
Cyclin-dependent kinase 4/cyclin D	CCND3 CCND1 CDK4 CCND2	P30281 P24385 P11802 P30279	CHEMBL2095942	Other cytosolic protein	0.104672	34 / 0
CDC7/DBF4 (Cell division cycle 7-related protein kinase/Activator of S phase kinase)	DBF4 CDC7	Q9UBU7 O00311	CHEMBL2111377	Kinase	0.104672	26 / 0
Potassium channel subfamily K member 3	KCNK3	O14649	CHEMBL2321613	Voltage-gated ion channel	0.104672	41 / 0
Potassium channel subfamily K member 9	KCNK9	Q9NPC2	CHEMBL2321614	Voltage-gated ion channel	0.104672	30 / 0
Mannose-6-phosphate isomerase	MPI	P34949	CHEMBL2758	Isomerase	0.104672	15 / 0
P2X purinoceptor 7	P2RX7	Q99572	CHEMBL4805	Ligand-gated ion channel	0.104672	402 / 0
Serine/threonine-protein kinase RAF	RAF1	P04049	CHEMBL1906	Kinase	0.104672	61 / 0
Cytochrome P450 11B1	CYP11B1	P15538	CHEMBL1908	Cytochrome P450	0.104672	196 / 0
Cytochrome P450 11B2	CYP11B2	P19099	CHEMBL2722	Cytochrome P450	0.104672	210 / 0
Telomerase reverse transcriptase	TERT	O14746	CHEMBL2916	Enzyme	0.104672	27 / 0
Prolyl endopeptidase	PREP	P48147	CHEMBL3202	Protease	0.104672	124 / 0
LIM domain kinase 2	LIMK2	P53671	CHEMBL5932	Kinase	0.104672	57 / 0
Tyrosine-protein kinase ABL	ABL1	P00519	CHEMBL1862	Kinase	0.104672	250 / 0
Cyclophilin A	PPIA	P62937	CHEMBL1949	Isomerase	0.104672	58 / 0
Hexokinase type IV	GCK	P35557	CHEMBL3820	Enzyme	0.104672	141 / 0
Orexin receptor 2	HCRTR2	O43614	CHEMBL4792	Family A G protein-coupled receptor	0.104672	950 / 0
Orexin receptor 1	HCRTR1	O43613	CHEMBL5113	Family A G protein-coupled receptor	0.104672	801 / 0
Leucine-rich repeat serine/threonine-protein kinase 2	LRRK2	Q5S007	CHEMBL1075104	Kinase	0.104672	101 / 0
Corticotropin releasing factor receptor 1	CRHR1	P34998	CHEMBL1800	Family B G protein-coupled receptor	0.104672	397 / 0
Phosphodiesterase 7A	PDE7A	Q13946	CHEMBL3012	Phosphodiesterase	0.104672	59 / 0
Cathepsin (B and K)	CTSB	P07858	CHEMBL4072	Protease	0.104672	197 / 0
