# Supplementary material for: Study on the Mechanism of DNHP's Effects on Brain Damage Based on Network Toxicology
Source: Research Square preprint supplement (doi:10.21203/rs.3.rs-7966294/v1), 2025-12-01
Supplement: Supplementary file 5 [file be84db4ef4605d2d3697b9d2.xlsx]

## Sheet: Sheet1
UPB1
L1CAM
KMT2D
NSD2
NRAS
GRIN2B
ATIC
PRDM16
OGT
MGAT2
GRIN1
PRMT7
NOS1
GAMT
SHH
CERS1
PORCN
EZH2
ABAT
KRAS
HTT
ASAH1
EHMT1
HNRNPA1
ADGRG1
ST3GAL3
GRIN3A
NEU1
FOLH1
CACNA1B
KMT2E
MAPK8
NCOR2
NAT2
NAGLU
NAA10
HRAS
DPAGT1
GALNT2
POMGNT1
HNMT
FGFR1
MYCN
SETD2
AGRN
HNRNPH2
GRIN2D
KMT2A
NCAM1
GBA1
POU3F2
B4GALT1
FBXO11
NAGA
NGLY1
HEXA
HEXB
SETD1A
GNE
NDRG1
NSD1
ASH1L
SETD1B
YWHAG
KMT2C
ADM
TNF
FTO
ACTB
CDH2
MAPK10
APP
VEGFA
GRIN2A
FGF23
PARP1
RAD21
F2R
FLT1
PDGFRB
KIT
PDE10A
SMO
GABRB3
GABRA3
GABRG2
GABRA1
GABRA5
GABRA2
ELANE
SCN4A
PRKCD
GRM5
AR
CTSK
HIF1A
EGFR
CASP3
SLC6A9
ABCG2
PRKCA
RORB
RORA
VCP
ADORA1
ADORA2A
MAPK14
JAK2
MAP2K1
OXTR
HTR2C
HTR2A
PDE4A
PDE4B
CASP1
TSPO
SCN5A
CCND1
CDK4
CCND2
KCNK9
MPI
P2RX7
RAF1
TERT
ABL1
GCK
LRRK2
CRHR1
CTSB
