# Supplementary material for: Study on the Mechanism of DNHP's Effects on Brain Damage Based on Network Toxicology
Source: Research Square preprint supplement (doi:10.21203/rs.3.rs-7966294/v1), 2025-12-01
Supplement: Supplementary file 6 [file bf9f8f716c683f1db8152af6.xlsx]

## Sheet: Sheet1
NA
UPB1
NAA16
NA|NA|NA
FKBP4
FUT3
NEU2
SMYD3
ENGASE
HEXB|HEXA
METTL21A
EIF2A
VEGFA|KDR
L1CAM
DOT1L
PKN1|RHOA
TYMS|ATIC
CERS4
NA|NA|NA|NA|NA|NA|NA|NA|GRID1|NA|NA|NA|NA|NA|NA|NA|NA|GRID2
FGFR1|VHL
FMO3|FMO2|FMO4|FMO5|FMO1
KMT2D
SUV39H2
NSD2
STK4|STK3
NRAS
RAF1|KRAS
PRMT8
MGAT3
KMT5B
NOS1|NOS2
NTMT2
CACNA1B|APBA1
GRIN2B
PRDM9
NA|NA
CERS5
AK2
NTHL1
MEP1A
MEP1B
MYOC
B3GNT2
GNMT
ATIC
CHST4
PRDM16
NSD3|VHL
CERS2
PEF1
VHL|BANF1
B3GALT1
OGT
MAP2K7
MGAT2
GRIN1
CACNA2D1|CACNA1B|CACNB3
CDC37
ACER2
RIOK1|PRMT5
PRMT6
PRMT7
MAPK9
ASAH2
DDAH1
PARP1|VHL
ATIC|GART
SMYD2
NOS1
EHMT2
USP1|WDR48
NMT1
MAPK8|MAPK9
ACER1
ST3GAL1
GPR18
ACOT13
GAMT
TYMS|ATIC|GART
FMO3
SHH
OGA
CERS1
SETDB1
PORCN
EZH2
ABAT
GRIN1|GRIN2A|GRIN2B|GRIN2D|GRIN3B|GRIN2C|GRIN3A
FGFR3|FGFR1|FGFR4|FGFR2
NA|NA|NA|NA
KRAS
PCIF1
HTT
SMYD1
ASAH1
EHMT1
HNRNPA1
GRIN1|GRIN2C
NAT1
MAPK10|MAPK9
ADGRG1
SAT1
ST3GAL3
EZH1|EED|SUZ12|AEBP2|RBBP4
KIF3B
NANP
CRBN|ADGRG1
GRIN3A
SLC25A5
GALNT6
EZH2|EED|SUZ12
NA|NA|NA|NA|NA|NA|NA|NA|NA|NA|NA
KMT5A
STK24
DNPH1
HSP90AA1|CDC37
NEU1
SETD7
MAPK10|RIPK1
INMT
MPG
VEGFA|NRP2
FOLH1
NTMT1
PITPNM1
NAT10
FPR1|FPR2
PRDM6
PRDM7
HDAC3|NCOR1
