# Supplementary material for: Study on the Mechanism of DNHP's Effects on Brain Damage Based on Network Toxicology
Source: Research Square preprint supplement (doi:10.21203/rs.3.rs-7966294/v1), 2025-12-01
Supplement: Supplementary file 7 [file d7f72d1a629dae3b8c35294c.xlsx]

## Sheet: Sheet1
BDNF
PLA2G6
TP53
POMT2
BDNF-AS
PANK2
POMGNT1
MAPT
COL4A1
DAG1
APOE
PSEN1
B3GALNT2
CRPPA
GFAP
IL6
PIK3CA
APP
FKRP
FKTN
GMPPB
WDR45
GLUL
PTEN
TNF
SLC2A1
GAD1
EGFR
AFG2A
POMGNT2
COL4A2
POMT1
ADGRG1
CTNNB1
NPPB
COASY
LARGE1
BRAF
TSPAN1
SNCA
C19orf12
NTRK2
TUBB3
TSC2
SMARCB1
TUBB2B
DYNC1H1
IL10
POMK
CSF1R
AKT1
SMC3
FTL
TGFB1
PGAP1
TSC1
SLC6A4
B4GAT1
IFNG
MTOR
IDH1
BMP4
CACNA1A
RERE
PRKN
SMC1A
F2
TH
TUBB
KIF5C
TBCD
PTPN11
MAPK8IP3
GRIN2B
SOD1
IDH2
TUBB2A
INS
FOXG1
IL1B
IGF1
ACTB
KRAS
POLG
DARS2
COMT
FGFR1
DCX
H19
NKX2-1
CCL2
RAD21
GRIN1
TUBA1A
CASP3
JAM3
MTHFR
PDGFRB
SMAD5-AS1
PLP1
MECP2
SLC6A3
VWF
MFSD2A
MAPK1
TBR1
GCDH
PRNP
NF1
ACE
S100B
SHH
PAFAH1B1
SLC1A3
SYP
GDNF
LAMA2
PIK3R1
ENO2
SCN1A
AKT3
NGF
MBP
SOX2
NOTCH3
FMR1
TREM2
PTCH1
RELN
NOS2
SOD2-OT1
MAOA
PSAP
ABCB1
FGFR2
CKB
AQP4
MMP9
GRN
DLL1
NRAS
CBS
SMARCA4
SCN2A
UCHL1
CXCL8
GBA1
SQSTM1
GALC
GNAO1
KIF2A
TUBG1
SDHB
HK1
PI4KA
SPTAN1
PDGFB
TARDBP
TRAPPC9
TBCE
CP
SLC18A2
CDK5
SLC1A2
ALK
ICAM1
TCF4
LEP
ATP13A2
DNM1
BCL2
ZEB2
NOS3
FA2H
NAXE
HRAS
SNORD118
TLR4
VEGFA
MPO
SFTA3
CERNA3
NFIA
MPDZ
HTR1A
ALB
NTRK1
CRP
NOS1
OCLN
GRM7
ATM
TTR
PSEN2
RXYLT1
H3-3A
PDYN
LRRK2
LRP1
EGF
CDKN1B
RAC1
DNM1L
SUFU
SOX10
GLS
WDR81
CDH2
GJA1
ARID1A
LINC01672
CXCR4
MEG3
SLC17A5
HMOX1
UBE3A
MSH6
NLRP3
BACE1
BCYRN1
APC2
PAX6
CYP27A1
RHOA
NDE1
FAS
CASK
ATRX
LCN2
ASPA
MALAT1
ENG
GABRA1
DMD
DMBT1
ATP1A3
FGF2
STXBP1
STAT3
CHAT
ARX
ARSA
KCNB1
MSH2
EML1
VCP
APC
GCH1
HSPD1
CDKL5
PMS2
RAI1
RNASEH2C
SLC6A1
TREX1
MYCN
PARK7
SPAST
SPG11
MYC
GRIA3
ATP7B
KCNQ2
SMARCE1
SYNGAP1
ATP1A2
GRIN2A
DHCR7
CST3
SLC16A2
CNTN2
NPC1
OTX2
CHD7
MLC1
ABCD1
NOTCH1
TYROBP
IL4
ANK3
RB1
IL1A
HSPB1
WFS1
KIF1A
KMT2D
PAH
FLNA
SCN1B
MIR21
SCN8A
MEF2C
TERT
MLH1
DRD2
PRRT2
PCDH19
SLC12A5
ARG1
MED17
HLA-DRB1
ADAR
F5
DEPDC5
GABRG2
NAGLU
IGF1R
DARS1
HTT
PTPN23
MAG
CHRNA7
PPT1
CTNNA2
TOR1A
CRH
MED12
HLA-B
MAPK3
AARS2
CDKN2A
ARFGEF2
CNP
MAP1B
CLDN5
DNAJC6
SOX3
IL18
DDC
SLC20A2
SNAP25
SORL1
SERPINE1
GAMT
HTRA1
SCN3A
AIFM1
PTGS2
SCN9A
PIK3CG
EPCAM
GPT
LINC02605
VPS13A
CACNA1C
NIPBL
PRF1
FUS
ASXL1
MCPH1
TJP1
ALDH7A1
NF2
FOXP2
CDC42
TMX2-CTNND1
SLC1A1
CNTNAP2
CPT2
NPPA
SMPD1
SLC6A8
HGF
HEPACAM
WDR62
NFIX
CTSD
VHL
PNKP
ADAT3
SERPINI1
KCNJ10
PRUNE1
MIR142
EPO
DYRK1A
GLA
PLCB1
IQSEC2
NPC2
POMC
DICER1
NFE2L2
TBC1D24
CCND1
EP300
CRPPA-AS1
SHANK3
FABP7
GPT2
MET
HIF1A
BRCA2
DNMT3A
ACHE
PPARG
CTLA4
FGFR3
HTR2A
L1CAM
HLA-DQB1
POLR1C
KCNA1
INSR
NACC1
SDHA
MIR34A
PLAA
SRPX2
HPRT1
TUBB4A
EZH2
CREBBP
KRIT1
GRM1
LRP2
GLDC
TUG1
LMNB1
MEFV
MAP2K1
CTC1
CDK5RAP2
SETD2
GLUD1
COL18A1
ERBB4
ESR1
UBTF
PINK1
TUBGCP2
ASPM
XPR1
PHOX2B
CXCL10
PRKAR1A
ALDH5A1
HDAC4
MAP2
OTC
SDHD
PMM2
SCARB2
IFIH1
SLC25A22
APOA1
LGI1
BASP1
GNAQ
SMG9
HSPG2
KCNA2
SMAD4
CD46
CREB1
AGTR2
CDK6
ABCA7
GSK3B
MAPK10
XIST
HMGB1
PTGDS
PNKD
ABCC8
GLI2
GAS5
FOS
GLB1
GABRB3
DLG4
CDK4
SCARNA5
CNR1
MFN2
ABCG2
EDN1
ADSL
GNAS
RNASEH2A
LAMB1
SPR
SIX3
MEN1
CCDC88C
DHFR
STX1A
ABAT
MMP2
ADNP
EPHB2
ZFYVE26
TGIF1
RET
GRIK2
PRKDC
EIF2B5
GJC2
SLC4A10
PPP1R12A
NDUFS4
CD36
FH
GAL
AGT
MTRFR
MIR17
ACTG1
PPP3CA
TPP1
ANK2
IL2
LMNA
NSD1
HTRA2
BCL11A
PCNA
COL3A1
HEXA
GABBR1
HCN1
PHGDH
RNASEH2B
XDH
CLN3
SLC16A1
CACNA1G
SRC
CACNA1H
FGF8
L2HGDH
PIK3R2
NTF3
ACO2
SLC39A8
THBD
GNB1
SLC25A12
PGR-AS1
SLC19A3
PTK2
RAF1
HCRT
NEFL
DCTN1
EZR
CHRNA4
SIGMAR1
TWNK
VLDLR
ZIC1
MME
CAT
SYNJ1
SMARCA2
SZT2
EIF2B2
BMP2
JUN
RYR1
SATB2
CACNA1D
ROGDI
SLC6A9
NFKB1
KCNT1
DNMT1
CACNA1B
CLCN3
TIMM8A
OPA1
KIF5A
GATM
GATA3
CHMP2B
ACADM
SPG7
OPHN1
CALM1
PDCD10
RAC3
HEXB
TRIM8
CFH
SOX11
SAMHD1
PYCR2
STIL
ALPL
WWOX
TUBA8
CAMK2B
CCK
DBH
NEDD4L
MIR125A
ATN1
CIC
FOLR1
HSD17B10
RAB3GAP2
TSEN54
NEXMIF
ATL1
GABRD
GABRA5
C9orf72
ERBB2
CLN5
NR4A2
MIR25
NEAT1
WDR45B
FGF17
BCR
CRAT
MTR
BCOR
ST3GAL5
BSCL2
BPTF
GABRB2
CDH1
ACVR1
MVK
KAT6B
TRAPPC11
CEP290
F3
CASP8
CLN6
CYCS
AIMP1
DDX3X
DMXL2
PC
VCAM1
NES
ARHGEF9
SYNE1
AGER
CD4
GAPDH
MAPK8IP1
TXN2
FARS2
ARNT2
G6PC1
SPTBN4
KDM6A
GPHN
CSTB
GNRH1
HECW2
POLR3B
QARS1
YAP1
BCL2L1
UCP2
OFD1
CENPJ
IGF2
GABBR2
MT-TL1
KDR
KCNJ2
PAK3
MACF1
NRXN1
EPM2A
SLC9A6
CACNA1E
RAB18
SGCE
CCND2
MOCS2
SYT1
ITPR1
PRPS1
PPP2R1A
ANKLE2
ACVRL1
RTTN
HAVCR1
CAMK2A
ECE1
EIF2B1
FUCA1
ITGAM
ROBO1
MIR133B
SLC1A4
PIGU
MIR155
FTO
BAX
KATNB1
VPS11
ATP7A
ZIC2
STAT2
TMEM106B
FOXP1
AP4M1
PRODH
LAMP2
CERS1
GUSB
PLG
NAXD
ASTN2
PDHA1
LOC126863256
CSF3
AKT2
EHMT1
DYSF
CLPB
ADGRB1
KARS1
MAPK8
TECPR2
ATP6AP2
MCOLN1
ADAMTS13
MYLK
CASR
RNF216
RPS6KA3
DEAF1
FIG4
MGMT
ATP1A1
PIGA
SUOX
BRD4
CHD2
AARS1
JAK2
DPAGT1
AFF2
VDR
SERAC1
CRBN
BEX4
SLC25A13
ODC1
IL17A
SMAD2
MPC1
LDLR
COQ8A
PNPO
MIAT
PRKCA
PDCD1
MN1
ARID1B
GABRB1
MPV17
DNAJC5
MMACHC
ADCY5
NEU1
TBCK
RPGRIP1L
PCNT
PLAU
MOCS1
DLD
KCTD7
SLC25A1
CLCN2
KCNMA1
USP18
HIP1
IFT140
KMT2A
SETX
GPSM2
SIRT1
UNC80
IBA57
YWHAE
HCN2
RARS2
F7
ERCC6
RAB39B
GRIA1
SACS
SDHC
ACADS
TNFRSF1A
SMO
STX1B
PEX5
IDUA
PARP1
KAT5
ACTL6B
NCAM1
NR3C1
EXOSC3
INPP5E
HYCC1
MAGEL2
CDH5
EPRS1
GJB2
POLR3A
GNE
TYMP
GABRA2
C12orf57
SCO2
PSAT1
PDE4D
CC2D2A
CASP9
HUWE1
SOX9
EEF1A2
RAB3GAP1
EMX2
NARS2
MIR146B
CRYAB
ZSWIM6
PEX26
COL1A1
NKX6-2
GRID2
PLEKHG2
NECTIN1
MLYCD
GOLGA2
SELP
ADAM22
MEIS2
PEX1
TMEM107
REN
ASS1
VAMP2
GCK
AMPD2
RTN4
CTNND2
PEX6
IKBKG
MICU1
TRIO
TFRC
PURA
ITM2B
RYR3
MBD5
PCCB
ERCC2
PDP1
TK2
EPB41L1
LAMC3
BSX
DLAT
BCAP31
VARS1
RARS1
CRB2
KCNQ3
AHI1
RNASET2
PIGV
BTD
CALM2
ST3GAL3
CLU
SLC9A1
CSNK2A1
NPY
PCCA
HFE
TBK1
HERC2
EIF2AK3
QDPR
EARS2
SILC1
ERCC1
NDST1
PEX2
PACS2
MAPK14
EOMES
CD274
FARSB
MKS1
CHI3L1
RTN4IP1
C3
AMT
KIT
WASF1
CYP27B1
ACOX1
PECAM1
GCSH
GATAD2B
SPP1
MAF
KANK1
YWHAG
ABCC1
FGF23
HSD17B4
PVT1
MAST1
HESX1
VPS13B
TSPO
PODXL
CPT1A
CXCL12
RPS27A
MFSD8
AUTS2
SLC13A5
KCNJ11
AP3B2
PRTN3
CPS1
NRXN2
GRIN2D
TAT
HOTAIR
NHLRC1
ATP8A2
LMNB2
KCND3
ABL1
TSPAN7
VIM
RTN4R
PYGB
SYN1
NGFR
SLC6A17
PWAR1
MT-CYB
SARS1
NDN
DPYD
NLGN3
GBE1
NDP
CACNA2D2
TF
SCN5A
ANXA11
PEX10
ADD3
FAT4
CLN8
MYT1L
VRK1
ETHE1
CSF2
FASN
MIR210
SEPSECS
ALG13
ATXN2
GRIA2
SNCB
SCN11A
IL1RAPL1
CACNB4
WT1
WDFY3
TSEN2
HIBCH
PEX19
MIR223
PIK3CD
ACOT7
AIP
SERPINC1
BCL11B
NRROS
CNNM2
DCC
XRCC1
AMACR
PQBP1
PAX2
POLG2
ATP5F1A
FRRS1L
SNX14
ABCA1
NSDHL
ITGB3
NAGS
GFM1
CHRNB2
FASLG
GLI3
STAT1
DPM1
IDS
CCM2
BRCA1
PMPCA
PEX16
CCR2
SPARC
DIP2B
MT-ND1
PEX7
PPP1R15B
ACY1
SIK1
FGB
MIR146A
PPP2R5D
NLGN4X
AUH
ERCC8
TRPV4
NDUFV2
DCAF17
SUCLA2
SOD2
NTN1
TSEN15
MCCC2
CACNG2
CPLX1
RNU4ATAC
NAT8L
HDAC1
PTS
TRAPPC6B
ELANE
SNRPN
ADORA1
PDGFRA
LYRM7
BEAN1
STK11
RHEB
ABCB7
ADGRV1
GDI1
RHOBTB2
KIFBP
EIF2B3
MAP2K2
SLC39A14
ATP6V1B2
CHKB
OLIG2
AFG3L2
DNAJC19
TBX1
GSR
SRD5A3
CLCN6
COQ2
TIMP3
CHRNA2
KMT2C
ADA2
ATRIP
SLC12A2
PGK1
SURF1
MIR29A
GTPBP2
SLC25A4
SETD1A
BIN1
FTH1
CEP152
MIF
SLC25A15
CRHR1
MDM2
SLC35A2
ZNF335
DHCR24
REEP1
ADIPOQ
LBR
SV2A
TLR2
ERMARD
RBFOX1
HMGCL
FASTKD2
PEX11B
HSP90AA1
ZBTB20
PAK1
CDKN1A
IER3IP1
DANCR
ZNF423
EIF2B4
CSF1
MAPRE2
CALR
HERC1
ERF
KCNAB2
PLAT
FHL1
DLG1
IVD
MAX
PTH
NEUROD2
PDHB
ITGB1
ALDH4A1
EIF2AK2
CACNA2D1
GYS1
NDUFV1
GAP43
TGFB2
SLC12A6
NAA10
ADA
SUMF1
ALX4
AQP2
DPM2
GAA
ATXN10
HADH
PIGP
ACAD9
MIRLET7C
BCS1L
RLBP1
POGZ
MMUT
JAM2
GRIA4
KANSL1
B2M
TSFM
CDON
HIVEP2
IQSEC1
CEP164
LOC106627981
KNG1
TANGO2
ETFDH
COL2A1
GAD2
SREBF1
FBXL4
MCCC1
COL5A1
TBC1D23
KCNC1
JPH3
DPM3
CD40LG
SMAD3
HSPA4
SOX2-OT
MIR140
IL12A
KDM5C
COQ9
PPP2CA
FLCN
ANGPT1
CLCN4
TGFBR2
DKC1
NPHP1
MIR126
USP7
FN1
CCL5
KCNC3
NDUFS3
HLCS
MYO5A
GM2A
ATP2A2
CYFIP2
TMTC3
APTX
EGR1
CBL
DIAPH1
MAN2B1
ATR
DCHS1
COX6B1
AP1S2
CUL4B
SUCLG1
ZBTB18
TRAPPC12
TUBA4A
CAV1
EFTUD2
RRM2B
GNAI1
APOB
ALDH3A2
HCFC1
ITPA
IL1RN
SKI
PIK3CB
STUB1
COQ8B
NPRL3
GAN
CALM3
BTK
SLC22A5
MARS2
KCNH1
SNAP29
MID1
CUL3
MAOB
NOX4
ANGPT2
ETFA
PIGN
FGF1
PCLO
EMC1
KIF11
GLRA1
EMSLR
ABCA2
SDCCAG8
YY1
PTN
ATP6V0A1
NDUFS7
NADK2
UBQLN2
NMNAT1
ASTN1
NR2F1
OCRL
CCDC88A
TAF1
DOCK3
HBB
PDE10A
BMP6
CNTF
CHKA
ALG1
TBC1D20
PRL
DLG3
MTRR
VPS51
F8
ABCC9
FLVCR2
CDKN2B-AS1
NPAP1
H3-3B
MIR145
NECAP1
SHROOM4
ADORA2A
TMEM67
ARMC9
FANCC
TCTN2
LIG4
SETBP1
MB
ASH1L
ELN
CCR5
DPYS
NDUFS1
IL13
GPC3
PRKCG
SOX5
SETD5
NRG1
ASAH1
MSX2
SDHAF1
GRM5
KIRREL3
MIR221
GSTM1
ASXL3
RYR2
IL12B
FOXO1
SOX4
MDH2
GNPTAB
NTRK3
PEX3
PEX13
SLC37A4
LAMA1
FGA
PIGO
AGK
KCND2
MAGI2
DGUOK
OPA3
PRKRA
PPARA
MT-CO3
UBE2A
TTC19
SCP2
SLC2A3
SST
KCNJ6
SRCAP
AGTR1
MT3
CEP120
FBXO7
MMP3
SLC25A3
ATP6V0A2
GLI1
DDHD2
UBB
WDR73
KCNQ1OT1
PHACTR1
EIF4G1
ACSL4
FGF12
VPS35
CTSF
GJB1
COL4A2-AS1
EXOSC8
TIMP1
KCNQ5
ELP2
ALMS1
HDAC8
FBN1
MBTPS2
MBOAT7
BRAT1
MMADHC
CHEK2
SON
RANBP2
F10
TLR3
PHF8
HNRNPU
SLC25A20
POU1F1
NIPA1
SP1
TNNT2
CILK1
GRIP1
EDNRB
RPIA
GLRX5
FLT1
EFHC1
PGAP2
PROC
NPHP4
SHANK2
CIT
TTN
PSPH
GTPBP3
LEPR
CAMTA1
PTF1A
NALCN
ERCC3
PRSS12
LRPPRC
HCN4
KIF1B
PTCHD1
KLF13
UFM1
CCL3
ANO10
ATP6V1A
MEGF10
HNRNPH2
CEP135
BMP7
STX11
SLC25A46
AGRN
INTS11
AP4B1
FOXRED1
SLC7A5
NGLY1
MIR20A
D2HGDH
NBEA
SELE
TAC3
TNFSF11
CNTN4
LARS2
DOCK8
RPL10
SLC45A1
FADD
ITGA3
SLC6A19
TNNI3
FBP1
LOC129998005
MIR9-1
TRNT1
ECM1
CD34
TBL1XR1
CX3CR1
RBM8A
CNKSR2
CAMK2G
BCAN
RAD51
CHD8
ALAD
UPB1
TWIST1
RELA
CKM
MFF
TUSC3
CPOX
CHD3
HACE1
TIMP2
SIRPA
SNIP1
HMBS
SAMD9
TOE1
AGA
BCKDHB
IRF2BPL
HAX1
PIGQ
SLC9A9
SPTBN1
CYP2D6
RAP1A
CCR1
RBFOX3
ZMYM3
RUBCN
CFTR
TNC
TUBGCP6
TERC
BLTP1
CUX2
TAF2
COL6A2
SHMT2
KDM1A
EIF4E
MIR122
TRIM32
GHRL
DOLK
VARS2
CASP1
TMEM165
USP9X
SASS6
AHSG
KCTD17
FLII
UNC13D
THAP1
PEX12
CLTC
GRIN3A
NDUFAF4
MIR23A
OGT
GOSR2
NDUFS2
CDH11
SLC46A1
TMEM63A
ADARB1
ROBO3
ARF1
HCCS
SLC33A1
NDUFS8
VCAN
C5
GABRA6
RASA1
COG2
PLK4
ELOVL4
ERCC4
KIAA0586
MUC1
PIGT
SHOC2
PRKCZ
DHDDS
RETREG1
TPK1
HMGCR
ARVCF
FTSJ1
MIR27A
CHGA
PCDH12
XPNPEP3
XPC
NIN
KPTN
ADK
ANKH
RBPJ
ANKRD11
DMBX1
COX10
CEP104
TGFB3
SDHAF2
ALG6
CARS2
OPRM1
ST8SIA2
SLC26A1
MIR30A
UMPS
TRPS1
NONO
GLRB
CTNNA1
ALDH18A1
DNM3
GK
MTO1
MIR34C
DES
PEX14
SMS
GALT
DRD1
PPIL1
BGLAP
PRDX1
IL1R1
GABRA3
UBE3B
TMEM216
CSNK2B
STAMBP
FRMPD4
SCO1
CC2D1A
ACTA2
CYP2C9
SIN3A
ATIC
BCKDHA
FGF14
COX15
ERCC5
ATAD3A
MMP1
ADRA2B
CXCR2
NEFH
PHC1
TFAP2A
TMEM70
TNFRSF11B
INF2
MYD88
ALOX5
NSUN2
CPLANE1
WDR19
ARHGEF6
LHX1
KATNIP
LOC126806658
UGP2
LRP4
GNB5
GABRG3
PRDM8
GNA11
LOC110806262
NUS1
ASNS
PDSS2
NR4A1
TACR3
ASL
CTSK
SMARCC2
TSHR
PNPT1
GCG
ATPAF2
ATP2B3
OPTN
LMX1B
NFU1
ALDOB
MIR326
UBA5
HNRNPL
ATP6AP1
GH1
TACO1
KAT6A
SMCHD1
OSGEP
MYORG
SLC25A19
MIR199A1
ITGB2
PET100
GSN
SCN3B
PTK2B
F9
THY1
ETFB
TUFM
TAFAZZIN
NAGA
DLGAP2
IL3
ACADSB
RTEL1
ARV1
ZC4H2
NDUFA1
FAM111A
CYP2U1
HDAC6
NDUFAF2
CUX1
GSS
GOT2
ADPRS
ZDHHC15
ERBB3
FLNB
AR
AQP1
CD44
MIR18A
FLRT3
CEP63
PPOX
NPHP3
PNP
NDUFA10
TRA-TGC7-1
AVPR2
EDC3
CHD4
MAP4K4
HYLS1
MAPK8IP2
RBBP8
FAR1
HTR3A
CDH15
PROP1
ENTPD1
TUBGCP4
LIAS
SERPINA1
TEK
PVALB
NDUFAF6
MIR324
CA2
SOS1
NFKBIA
PRKCD
HNRNPA1
SPRED1
MIR494
IFNA1
WDR26
ATXN3
DLG2
NOTCH2
ARL13B
EPG5
MYOCD
ZBTB16
MRI1
PHF6
TG
DHPS
DIS3L2
PDPN
LYST
HNRNPA2B1
NCDN
SCN10A
CNPY3
SLC4A4
CLCNKB
UPF3B
TMEM231
MITF
NODAL
RAB27A
AVP
GFER
SLCO1C1
DAB1
STXBP2
NPPC
SGSH
FBXW7
MIR486-1
MORC2
PPARGC1A
SC5D
UGDH
DNM2
RALGAPA1
COX5A
KCNK9
CDK19
MED23
TGFBR1
ARHGAP31
DENND5A
RECQL4
STAR
FTCD
SEMA6B
PGAP3
TAC1
LARS1
FGF13
KLHL15
CLP1
KIAA0753
ESR2
PLXND1
MRPS22
CD8A
TCTN3
SNORD15A
MYH7
MPI
ABCC2
NDUFA13
B3GLCT
RMRP
BSN
MTM1
GLYCTK
SYN2
KCNJ13
GATA2
MPDU1
TMEM138
RUSC2
DPYSL2
MYH3
FXN
CDK10
SLC19A2
LONP1
EXT2
NFASC
NQO1
COLGALT1
PIGG
GUCY1A1
PIEZO2
THBS1
CAMK4
HPDL
ASCL1
DOCK6
REPS1
HLA-A
AASS
ANG
CXCL2
COG4
CTSA
TCIRG1
WASHC4
DNA2
HARS2
PRIMA1
EXTL3
TIMM50
AIMP2
SYNPO
FOXO3
AAAS
NDUFB9
SLC32A1
GSTM3
NUBPL
COA8
CHAMP1
COQ6
PIGH
NHEJ1
COX20
ADCYAP1
CX3CL1
NANS
HPD
GRM3
BUB1B
DPF2
AP4E1
TP53RK
CCBE1
BCKDK
ASXL2
SLC6A5
SCN4B
NSD2
ANOS1
MOG
TSEN34
GCM2
MIR7-3HG
PCDH7
LOX
AMER1
TTC21B
XK
ACP5
PDHX
ZNF711
SLC6A2
BOLA3
FDFT1
AP4S1
HLA-DQA1
GAS1
NID1
DISP1
PRMT7
SH2B1
WARS2
MIR151A
TNK2
CRADD
DSCAM
GATA6
MIR320A
SNX10
NEK9
PLPBP
HIC1
SYT14
PIGL
WAC
COG8
MIR451A
B9D1
UFC1
TKT
SARS2
LPL
KIF7
SLC22A8
RREB1
CHL1
FBXO31
CPA6
MIR132
NDUFAF1
WDR4
MED13L
ACTN4
PLOD1
CIZ1
SOST
TMEM126B
ATXN1
DBT
ADM
HADHA
UQCRC2
ECHS1
DOCK7
XIAP
COG6
CXCL1
CDC40
SCARB1
DRD3
NDUFA11
ACSF3
SPTLC1
ATG7
CTCF
TRAK1
IARS2
NLGN1
MIR106B
PCK1
CCDC115
MPL
YARS2
ZDHHC9
NCAPD3
CNOT1
CLPP
LIMK1
PPM1D
BCHE
IL33
ZMYND11
TRH
ERLIN2
FGD1
DAO
COL25A1
LRFN2
ACE2
MMAA
TMEM127
RNF13
LIPT1
TRAPPC4
HP
MT-ATP6
MID2
HTR1B
POU3F2
CLDN1
NDUFAF5
SEC24D
GNS
FCGR2A
RORB
NOD2
ARCN1
FBXO28
ITGA4
COL6A1
MIR22
SMARCAL1
IL17F
CYP46A1
STING1
GRIN3B
BICRA
FMN2
BMAL1
SHANK1
PREPL
NDUFS6
NCF2
MIR29B1
ZNF592
PUS1
STIM1
[truncated: 810 more rows]
